# Supplementary material for: Predictive network modeling in human induced pluripotent stem cells identifies key driver genes for insulin responsiveness
Source: PLoS Comput Biol. 2020 Dec 23;16(12):e1008491. doi: 10.1371/journal.pcbi.1008491 (PMC7790417; doi:10.1371/journal.pcbi.1008491)
Supplement: S3 Table — (XLSX) [file pcbi.1008491.s011.xlsx]

## Sheet: AS - IR
module	GO.ID	Term	Annotated	Significant	Expected	fold_enrichment	classic	BH
blue	GO:0006396	RNA processing	633	118	41.09	2.87174	5.6e-27	7.595e-24
blue	GO:0016071	mRNA metabolic process	594	102	38.56	2.64523	1.7e-20	8.1375e-18
blue	GO:0090304	nucleic acid metabolic process	3758	354	243.92	1.4513	1.6e-18	5.10588e-16
blue	GO:0006397	mRNA processing	390	75	25.31	2.96326	4.8e-18	1.3469e-15
blue	GO:0006139	nucleobase-containing compound metabolic...	4389	394	284.88	1.38304	1.5e-17	3.81445e-15
blue	GO:0006259	DNA metabolic process	764	112	49.59	2.25852	5.1e-17	1.20293e-14
blue	GO:0046483	heterocycle metabolic process	4505	395	292.41	1.35084	1.1e-15	1.90452e-13
blue	GO:0006725	cellular aromatic compound metabolic pro...	4506	395	292.48	1.35052	1.2e-15	2.03438e-13
blue	GO:0034641	cellular nitrogen compound metabolic pro...	4679	406	303.71	1.3368	1.6e-15	2.65714e-13
blue	GO:0022613	ribonucleoprotein complex biogenesis	251	52	16.29	3.19214	3.6e-14	4.96525e-12
blue	GO:0044260	cellular macromolecule metabolic process	5654	462	366.99	1.25889	1.1e-13	1.34605e-11
blue	GO:1901360	organic cyclic compound metabolic proces...	4644	396	301.43	1.31374	1.6e-13	1.84681e-11
blue	GO:0006974	response to DNA damage stimulus	612	89	39.72	2.24068	2.1e-13	2.37344e-11
blue	GO:0008380	RNA splicing	317	58	20.58	2.81827	3.4e-13	3.71376e-11
blue	GO:0000278	mitotic cell cycle	771	103	50.04	2.05835	5.4e-13	5.78191e-11
blue	GO:0006260	DNA replication	247	49	16.03	3.05677	1.1e-12	1.11196e-10
blue	GO:0034660	ncRNA metabolic process	289	53	18.76	2.82516	3.4e-12	3.23596e-10
blue	GO:0006807	nitrogen compound metabolic process	4965	411	322.27	1.27533	4.8e-12	4.36425e-10
blue	GO:0010467	gene expression	3722	325	241.59	1.34525	1.7e-11	1.3175e-09
blue	GO:0042254	ribosome biogenesis	151	35	9.8	3.57143	2.2e-11	1.67313e-09
blue	GO:0022403	cell cycle phase	247	46	16.03	2.86962	5.6e-11	3.97991e-09
blue	GO:0000375	RNA splicing, via transesterification re...	212	41	13.76	2.97965	1.9e-10	1.2369e-08
blue	GO:0034470	ncRNA processing	204	40	13.24	3.02115	2.1e-10	1.36165e-08
blue	GO:0051325	interphase	225	42	14.6	2.87671	3.6e-10	2.21932e-08
blue	GO:0043170	macromolecule metabolic process	6064	472	393.6	1.19919	5.8e-10	3.40776e-08
blue	GO:0006281	DNA repair	393	58	25.51	2.27362	2.5e-09	1.38393e-07
blue	GO:0022402	cell cycle process	1011	113	65.62	1.72204	3.2e-09	1.73023e-07
blue	GO:0016070	RNA metabolic process	3311	286	214.91	1.33079	3.2e-09	1.73023e-07
blue	GO:0000082	G1/S transition of mitotic cell cycle	197	37	12.79	2.89289	3.5e-09	1.87377e-07
blue	GO:0000377	RNA splicing, via transesterification re...	207	38	13.44	2.82738	4.1e-09	2.18064e-07
blue	GO:0000398	mRNA splicing, via spliceosome	207	38	13.44	2.82738	4.1e-09	2.18064e-07
blue	GO:0044772	mitotic cell cycle phase transition	373	55	24.21	2.27179	6.7e-09	3.47269e-07
blue	GO:0006310	DNA recombination	194	36	12.59	2.85941	7.9e-09	4.05591e-07
blue	GO:0051329	interphase of mitotic cell cycle	221	39	14.34	2.71967	8.2e-09	4.18354e-07
blue	GO:0051439	regulation of ubiquitin-protein ligase a...	76	21	4.93	4.25963	8.3e-09	4.19511e-07
blue	GO:0051437	positive regulation of ubiquitin-protein...	70	20	4.54	4.40529	1e-08	4.97706e-07
blue	GO:0016072	rRNA metabolic process	113	26	7.33	3.54707	1e-08	4.97706e-07
blue	GO:0051443	positive regulation of ubiquitin-protein...	78	21	5.06	4.1502	1.4e-08	6.70147e-07
blue	GO:0006364	rRNA processing	107	25	6.95	3.59712	1.4e-08	6.70147e-07
blue	GO:0044237	cellular metabolic process	7133	531	462.99	1.14689	1.5e-08	7.13816e-07
blue	GO:0031145	anaphase-promoting complex-dependent pro...	81	21	5.26	3.9924	2.9e-08	1.30021e-06
blue	GO:0051351	positive regulation of ligase activity	81	21	5.26	3.9924	2.9e-08	1.30021e-06
blue	GO:0007093	mitotic cell cycle checkpoint	136	28	8.83	3.17101	3.7e-08	1.6408e-06
blue	GO:0044770	cell cycle phase transition	436	59	28.3	2.08481	4.6e-08	2.02338e-06
blue	GO:0051438	regulation of ubiquitin-protein ligase a...	91	22	5.91	3.7225	5.3e-08	2.30635e-06
blue	GO:0007049	cell cycle	1321	133	85.74	1.5512	7.8e-08	3.34066e-06
blue	GO:0044774	mitotic DNA integrity checkpoint	79	20	5.13	3.89864	9.4e-08	3.99439e-06
blue	GO:0051340	regulation of ligase activity	94	22	6.1	3.60656	9.9e-08	4.16337e-06
blue	GO:0031570	DNA integrity checkpoint	134	27	8.7	3.10345	1e-07	4.19459e-06
blue	GO:0051436	negative regulation of ubiquitin-protein...	67	18	4.35	4.13793	1.6e-07	6.54271e-06
blue	GO:0044238	primary metabolic process	7135	525	463.12	1.13362	2.5e-07	1.00962e-05
blue	GO:1901990	regulation of mitotic cell cycle phase t...	184	32	11.94	2.68007	2.6e-07	1.03968e-05
blue	GO:0000075	cell cycle checkpoint	212	35	13.76	2.5436	2.6e-07	1.03968e-05
blue	GO:1901991	negative regulation of mitotic cell cycl...	151	28	9.8	2.85714	3.7e-07	1.44754e-05
blue	GO:0051352	negative regulation of ligase activity	71	18	4.61	3.90456	4e-07	1.55e-05
blue	GO:0051444	negative regulation of ubiquitin-protein...	71	18	4.61	3.90456	4e-07	1.55e-05
blue	GO:0000280	nuclear division	325	46	21.1	2.18009	4.1e-07	1.58122e-05
blue	GO:0007067	mitosis	325	46	21.1	2.18009	4.1e-07	1.58122e-05
blue	GO:0000077	DNA damage checkpoint	128	25	8.31	3.00842	5.7e-07	2.16746e-05
blue	GO:0048285	organelle fission	350	48	22.72	2.11268	5.8e-07	2.20035e-05
blue	GO:0044773	mitotic DNA damage checkpoint	76	18	4.93	3.65112	1.2e-06	4.38876e-05
blue	GO:1901987	regulation of cell cycle phase transitio...	257	38	16.68	2.27818	1.4e-06	5.09732e-05
blue	GO:1901988	negative regulation of cell cycle phase ...	228	35	14.8	2.36486	1.5e-06	5.425e-05
blue	GO:0071704	organic substance metabolic process	7336	532	476.17	1.11725	2.3e-06	8.10227e-05
blue	GO:0006996	organelle organization	2102	185	136.44	1.35591	2.5e-06	8.73122e-05
blue	GO:0044265	cellular macromolecule catabolic process	690	76	44.79	1.69681	2.8e-06	9.75803e-05
blue	GO:0006261	DNA-dependent DNA replication	97	20	6.3	3.1746	3.2e-06	0.000110339
blue	GO:0006521	regulation of cellular amino acid metabo...	52	14	3.38	4.14201	3.6e-06	0.000123347
blue	GO:0031397	negative regulation of protein ubiquitin...	98	20	6.36	3.14465	3.8e-06	0.000129926
blue	GO:0033554	cellular response to stress	1139	111	73.93	1.50142	5.5e-06	0.000185711
blue	GO:0008152	metabolic process	7671	550	497.91	1.10462	5.6e-06	0.000188696
blue	GO:0031398	positive regulation of protein ubiquitin...	127	23	8.24	2.79126	6.1e-06	0.000203855
blue	GO:0006403	RNA localization	136	24	8.83	2.71801	6.2e-06	0.000206773
blue	GO:0015931	nucleobase-containing compound transport	146	25	9.48	2.63713	6.9e-06	0.000228247
blue	GO:0050657	nucleic acid transport	128	23	8.31	2.76775	7e-06	0.000230152
blue	GO:0050658	RNA transport	128	23	8.31	2.76775	7e-06	0.000230152
blue	GO:0051236	establishment of RNA localization	128	23	8.31	2.76775	7e-06	0.000230152
blue	GO:0031571	mitotic G1 DNA damage checkpoint	70	16	4.54	3.52423	7.6e-06	0.000245905
blue	GO:0044783	G1 DNA damage checkpoint	70	16	4.54	3.52423	7.6e-06	0.000245905
blue	GO:0006977	DNA damage response, signal transduction...	63	15	4.09	3.66748	8.6e-06	0.000272836
blue	GO:0072413	signal transduction involved in mitotic ...	63	15	4.09	3.66748	8.6e-06	0.000272836
blue	GO:0072431	signal transduction involved in mitotic ...	63	15	4.09	3.66748	8.6e-06	0.000272836
blue	GO:0010948	negative regulation of cell cycle proces...	257	36	16.68	2.15827	9.5e-06	0.000299637
blue	GO:0007346	regulation of mitotic cell cycle	278	38	18.04	2.10643	9.6e-06	0.000302205
blue	GO:0072401	signal transduction involved in DNA inte...	64	15	4.15	3.61446	1.1e-05	0.000339063
blue	GO:0072422	signal transduction involved in DNA dama...	64	15	4.15	3.61446	1.1e-05	0.000339063
blue	GO:2000045	regulation of G1/S transition of mitotic...	105	20	6.82	2.93255	1.1e-05	0.000339063
blue	GO:0072395	signal transduction involved in cell cyc...	65	15	4.22	3.5545	1.3e-05	0.000395467
blue	GO:0044403	symbiosis, encompassing mutualism throug...	635	69	41.22	1.67394	1.3e-05	0.000395467
blue	GO:0044419	interspecies interaction between organis...	635	69	41.22	1.67394	1.3e-05	0.000395467
blue	GO:0002479	antigen processing and presentation of e...	66	15	4.28	3.50467	1.6e-05	0.000478676
blue	GO:0008033	tRNA processing	74	16	4.8	3.33333	1.6e-05	0.000478676
blue	GO:0010564	regulation of cell cycle process	394	48	25.57	1.8772	1.6e-05	0.000478676
blue	GO:0042590	antigen processing and presentation of e...	67	15	4.35	3.44828	1.9e-05	0.000561207
blue	GO:0030330	DNA damage response, signal transduction...	100	19	6.49	2.92758	1.9e-05	0.000561207
blue	GO:0007005	mitochondrion organization	258	35	16.75	2.08955	2.5e-05	0.000726562
blue	GO:0000209	protein polyubiquitination	167	26	10.84	2.39852	2.6e-05	0.000752936
blue	GO:0072655	establishment of protein localization to...	78	16	5.06	3.16206	3.3e-05	0.000935671
blue	GO:0051276	chromosome organization	643	68	41.74	1.62913	3.7e-05	0.00104544
blue	GO:0070585	protein localization to mitochondrion	79	16	5.13	3.11891	3.8e-05	0.00106813
blue	GO:0051726	regulation of cell cycle	658	69	42.71	1.61555	4.2e-05	0.00117651
blue	GO:0043632	modification-dependent macromolecule cat...	391	46	25.38	1.81245	5.9e-05	0.00157672
blue	GO:0031396	regulation of protein ubiquitination	176	26	11.42	2.27671	6.6e-05	0.0017325
blue	GO:0072331	signal transduction by p53 class mediato...	128	21	8.31	2.52708	7.1e-05	0.00183417
blue	GO:0042770	signal transduction in response to DNA d...	110	19	7.14	2.66106	7.6e-05	0.00194176
blue	GO:0071158	positive regulation of cell cycle arrest	76	15	4.93	3.0426	9.1e-05	0.00226111
blue	GO:0002474	antigen processing and presentation of p...	85	16	5.52	2.89855	9.7e-05	0.00239556
blue	GO:2000134	negative regulation of G1/S transition o...	85	16	5.52	2.89855	9.7e-05	0.00239556
blue	GO:0006399	tRNA metabolic process	122	20	7.92	2.52525	0.00011	0.00263272
blue	GO:0022618	ribonucleoprotein complex assembly	122	20	7.92	2.52525	0.00011	0.00263272
blue	GO:0033238	regulation of cellular amine metabolic p...	69	14	4.48	3.125	0.00011	0.00263272
blue	GO:0031123	RNA 3'-end processing	104	18	6.75	2.66667	0.00011	0.00263272
blue	GO:0032784	regulation of DNA-dependent transcriptio...	32	9	2.08	4.32692	0.00014	0.00328788
blue	GO:0006354	DNA-dependent transcription, elongation	107	18	6.95	2.58993	0.00017	0.003875
blue	GO:0006626	protein targeting to mitochondrion	55	12	3.57	3.36134	0.00017	0.003875
blue	GO:0031124	mRNA 3'-end processing	90	16	5.84	2.73973	0.0002	0.00447115
blue	GO:0071826	ribonucleoprotein complex subunit organi...	128	20	8.31	2.40674	0.00021	0.00465
blue	GO:0006839	mitochondrial transport	148	22	9.61	2.28928	0.00021	0.00465
blue	GO:0006302	double-strand break repair	119	19	7.72	2.46114	0.00022	0.00485821
blue	GO:0044764	multi-organism cellular process	608	62	39.46	1.57121	0.00023	0.00503802
blue	GO:0006200	ATP catabolic process	66	13	4.28	3.03738	0.00027	0.00578953
blue	GO:0009057	macromolecule catabolic process	841	80	54.59	1.46547	0.00029	0.00611367
blue	GO:0051028	mRNA transport	112	18	7.27	2.47593	0.0003	0.00627571
blue	GO:0006412	translation	455	49	29.53	1.65933	0.0003	0.00627571
blue	GO:0006301	postreplication repair	16	6	1.04	5.76923	0.00033	0.00680703
blue	GO:0002200	somatic diversification of immune recept...	43	10	2.79	3.58423	0.00034	0.00696038
blue	GO:0009126	purine nucleoside monophosphate metaboli...	123	19	7.98	2.38095	0.00035	0.00712031
blue	GO:0009167	purine ribonucleoside monophosphate meta...	123	19	7.98	2.38095	0.00035	0.00712031
blue	GO:0019941	modification-dependent protein catabolic...	387	43	25.12	1.71178	0.00036	0.00727826
blue	GO:0016032	viral process	606	61	39.33	1.55098	0.00037	0.00742509
blue	GO:0006356	regulation of transcription from RNA pol...	11	5	0.71	7.04225	0.00038	0.00755128
blue	GO:0080111	DNA demethylation	11	5	0.71	7.04225	0.00038	0.00755128
blue	GO:0071156	regulation of cell cycle arrest	86	15	5.58	2.68817	0.00038	0.00755128
blue	GO:0009161	ribonucleoside monophosphate metabolic p...	134	20	8.7	2.29885	0.00039	0.00769364
blue	GO:0071840	cellular component organization or bioge...	3845	292	249.57	1.17001	0.00039	0.00769364
blue	GO:0009128	purine nucleoside monophosphate cataboli...	70	13	4.54	2.86344	0.00049	0.00928376
blue	GO:0009158	ribonucleoside monophosphate catabolic p...	70	13	4.54	2.86344	0.00049	0.00928376
blue	GO:0009169	purine ribonucleoside monophosphate cata...	70	13	4.54	2.86344	0.00049	0.00928376
blue	GO:0043161	proteasomal ubiquitin-dependent protein ...	232	29	15.06	1.92563	0.0005	0.00946221
blue	GO:0006511	ubiquitin-dependent protein catabolic pr...	382	42	24.79	1.69423	0.00053	0.0099375
blue	GO:0051603	proteolysis involved in cellular protein...	406	44	26.35	1.66983	0.00053	0.0099375
blue	GO:0034622	cellular macromolecular complex assembly	503	52	32.65	1.59265	0.00053	0.0099375
blue	GO:0010498	proteasomal protein catabolic process	245	30	15.9	1.88679	0.00057	0.0104704
blue	GO:0090068	positive regulation of cell cycle proces...	159	22	10.32	2.13178	0.0006	0.0108984
blue	GO:0009123	nucleoside monophosphate metabolic proce...	139	20	9.02	2.21729	0.00063	0.0112921
blue	GO:0009125	nucleoside monophosphate catabolic proce...	72	13	4.67	2.78373	0.00065	0.0115741
blue	GO:0000245	spliceosomal complex assembly	39	9	2.53	3.55731	0.00071	0.0124117
blue	GO:0070647	protein modification by small protein co...	610	60	39.59	1.51553	0.00074	0.0126242
blue	GO:0006275	regulation of DNA replication	82	14	5.32	2.63158	0.00074	0.0126242
blue	GO:0006405	RNA export from nucleus	73	13	4.74	2.74262	0.00075	0.0127281
blue	GO:0000387	spliceosomal snRNP assembly	32	8	2.08	3.84615	0.00079	0.0133236
blue	GO:0044085	cellular component biogenesis	1573	132	102.1	1.29285	0.00081	0.0136467
blue	GO:0030307	positive regulation of cell growth	74	13	4.8	2.70833	0.00086	0.0143113
blue	GO:0007080	mitotic metaphase plate congression	13	5	0.84	5.95238	0.00094	0.0153599
blue	GO:0000959	mitochondrial RNA metabolic process	19	6	1.23	4.87805	0.00096	0.0156084
blue	GO:0007339	binding of sperm to zona pellucida	19	6	1.23	4.87805	0.00096	0.0156084
blue	GO:0009303	rRNA transcription	19	6	1.23	4.87805	0.00096	0.0156084
blue	GO:0008156	negative regulation of DNA replication	33	8	2.14	3.73832	0.00098	0.0158072
blue	GO:0044786	cell cycle DNA replication	33	8	2.14	3.73832	0.00098	0.0158072
blue	GO:0044257	cellular protein catabolic process	419	44	27.2	1.61765	0.00102	0.016291
blue	GO:0015682	ferric iron transport	26	7	1.69	4.14201	0.00104	0.016465
blue	GO:0033260	nuclear cell cycle DNA replication	26	7	1.69	4.14201	0.00104	0.016465
blue	GO:0033572	transferrin transport	26	7	1.69	4.14201	0.00104	0.016465
blue	GO:0070979	protein K11-linked ubiquitination	26	7	1.69	4.14201	0.00104	0.016465
blue	GO:0072512	trivalent inorganic cation transport	26	7	1.69	4.14201	0.00104	0.016465
blue	GO:0007059	chromosome segregation	145	20	9.41	2.1254	0.00108	0.0168847
blue	GO:0000724	double-strand break repair via homologou...	58	11	3.76	2.92553	0.0011	0.0171316
blue	GO:0051053	negative regulation of DNA metabolic pro...	58	11	3.76	2.92553	0.0011	0.0171316
blue	GO:0006325	chromatin organization	484	49	31.42	1.55952	0.00121	0.0184389
blue	GO:0006360	transcription from RNA polymerase I prom...	34	8	2.21	3.61991	0.00121	0.0184389
blue	GO:0000288	nuclear-transcribed mRNA catabolic proce...	59	11	3.83	2.87206	0.00127	0.0191205
blue	GO:0000725	recombinational repair	59	11	3.83	2.87206	0.00127	0.0191205
blue	GO:0051301	cell division	449	46	29.14	1.57859	0.00133	0.0198221
blue	GO:0035510	DNA dealkylation	14	5	0.91	5.49451	0.00139	0.0206219
blue	GO:0006458	'de novo' protein folding	52	10	3.38	2.95858	0.00164	0.0235995
blue	GO:0016445	somatic diversification of immunoglobuli...	36	8	2.34	3.4188	0.0018	0.0251459
blue	GO:0051052	regulation of DNA metabolic process	184	23	11.94	1.9263	0.00184	0.0256607
blue	GO:0051168	nuclear export	120	17	7.79	2.18228	0.00186	0.0258731
blue	GO:0007050	cell cycle arrest	197	24	12.79	1.87647	0.00211	0.0285455
blue	GO:0045786	negative regulation of cell cycle	290	32	18.82	1.70032	0.00221	0.0294335
blue	GO:0045333	cellular respiration	143	19	9.28	2.04741	0.00222	0.0294702
blue	GO:0035036	sperm-egg recognition	22	6	1.43	4.1958	0.00222	0.0294702
blue	GO:0006457	protein folding	176	22	11.42	1.92644	0.00229	0.0301779
blue	GO:0000723	telomere maintenance	64	11	4.15	2.6506	0.00251	0.0324466
blue	GO:0031572	G2 DNA damage checkpoint	30	7	1.95	3.58974	0.00257	0.0330646
blue	GO:0000076	DNA replication checkpoint	10	4	0.65	6.15385	0.0027	0.0342498
blue	GO:0000090	mitotic anaphase	10	4	0.65	6.15385	0.0027	0.0342498
blue	GO:0000738	DNA catabolic process, exonucleolytic	10	4	0.65	6.15385	0.0027	0.0342498
blue	GO:0034661	ncRNA catabolic process	16	5	1.04	4.80769	0.00272	0.0343696
blue	GO:0016568	chromatin modification	428	43	27.78	1.54788	0.00273	0.0344692
blue	GO:0045927	positive regulation of growth	114	16	7.4	2.16216	0.00275	0.0346679
blue	GO:0002478	antigen processing and presentation of e...	146	19	9.48	2.00422	0.00282	0.0353586
blue	GO:0032200	telomere organization	65	11	4.22	2.60664	0.00285	0.035625
blue	GO:0048002	antigen processing and presentation of p...	158	20	10.26	1.94932	0.00307	0.0377659
blue	GO:0002562	somatic diversification of immune recept...	39	8	2.53	3.16206	0.00309	0.0379545
blue	GO:0016444	somatic cell DNA recombination	39	8	2.53	3.16206	0.00309	0.0379545
blue	GO:0019884	antigen processing and presentation of e...	148	19	9.61	1.97711	0.00329	0.0394001
blue	GO:0071103	DNA conformation change	148	19	9.61	1.97711	0.00329	0.0394001
blue	GO:0051310	metaphase plate congression	17	5	1.1	4.54545	0.00365	0.0428598
blue	GO:0051701	interaction with host	349	36	22.65	1.5894	0.00383	0.0445238
yellow	GO:0007049	cell cycle	1321	102	66.83	1.52626	5.9e-06	0.000198394
yellow	GO:0000278	mitotic cell cycle	771	67	39.01	1.71751	7.6e-06	0.000245905
yellow	GO:0044260	cellular macromolecule metabolic process	5654	336	286.06	1.17458	8.7e-06	0.000275472
yellow	GO:0043412	macromolecule modification	2303	157	116.52	1.34741	1.8e-05	0.000535558
yellow	GO:0070647	protein modification by small protein co...	610	55	30.86	1.78224	1.9e-05	0.000561207
yellow	GO:0006302	double-strand break repair	119	18	6.02	2.99003	2.8e-05	0.000805124
yellow	GO:0032446	protein modification by small protein co...	545	50	27.57	1.81357	2.9e-05	0.000828026
yellow	GO:0022402	cell cycle process	1011	80	51.15	1.56403	3e-05	0.000855079
yellow	GO:0016567	protein ubiquitination	509	47	25.75	1.82524	4.3e-05	0.00119833
yellow	GO:0006464	cellular protein modification process	2200	149	111.31	1.3386	4.6e-05	0.00127105
yellow	GO:0036211	protein modification process	2200	149	111.31	1.3386	4.6e-05	0.00127105
yellow	GO:0002224	toll-like receptor signaling pathway	114	17	5.77	2.94627	5.6e-05	0.00150396
yellow	GO:0016197	endosomal transport	142	19	7.18	2.64624	9.5e-05	0.00235331
yellow	GO:0051028	mRNA transport	112	16	5.67	2.82187	0.00015	0.00349749
yellow	GO:0035666	TRIF-dependent toll-like receptor signal...	69	12	3.49	3.4384	0.00016	0.00369886
yellow	GO:0034142	toll-like receptor 4 signaling pathway	91	14	4.6	3.04348	0.00018	0.00408008
yellow	GO:0043170	macromolecule metabolic process	6064	348	306.8	1.13429	0.00019	0.00427697
yellow	GO:0006281	DNA repair	393	37	19.88	1.86117	0.00019	0.00427697
yellow	GO:0002756	MyD88-independent toll-like receptor sig...	71	12	3.59	3.34262	0.00021	0.00465
yellow	GO:0002221	pattern recognition receptor signaling p...	128	17	6.48	2.62346	0.00024	0.00522193
yellow	GO:0006996	organelle organization	2102	139	106.35	1.30701	0.00028	0.00594909
yellow	GO:0002758	innate immune response-activating signal...	130	17	6.58	2.58359	0.00029	0.00611367
yellow	GO:0045088	regulation of innate immune response	183	21	9.26	2.26782	0.00037	0.00742509
yellow	GO:0006259	DNA metabolic process	764	60	38.65	1.55239	0.0004	0.00781513
yellow	GO:0034138	toll-like receptor 3 signaling pathway	76	12	3.85	3.11688	0.0004	0.00781513
yellow	GO:0002218	activation of innate immune response	134	17	6.78	2.50737	0.00042	0.00812782
yellow	GO:0006511	ubiquitin-dependent protein catabolic pr...	382	35	19.33	1.81066	0.00047	0.00897799
yellow	GO:0006403	RNA localization	136	17	6.88	2.47093	0.00049	0.00928376
yellow	GO:0008104	protein localization	1462	101	73.97	1.36542	0.00054	0.0100211
yellow	GO:0046907	intracellular transport	1171	84	59.25	1.41772	0.00054	0.0100211
yellow	GO:0019941	modification-dependent protein catabolic...	387	35	19.58	1.78754	0.0006	0.0108984
yellow	GO:0034162	toll-like receptor 9 signaling pathway	69	11	3.49	3.15186	0.00063	0.0112921
yellow	GO:0043161	proteasomal ubiquitin-dependent protein ...	232	24	11.74	2.04429	0.00068	0.0120033
yellow	GO:0050657	nucleic acid transport	128	16	6.48	2.46914	0.00072	0.0124792
yellow	GO:0050658	RNA transport	128	16	6.48	2.46914	0.00072	0.0124792
yellow	GO:0051236	establishment of RNA localization	128	16	6.48	2.46914	0.00072	0.0124792
yellow	GO:0031123	RNA 3'-end processing	104	14	5.26	2.6616	0.00072	0.0124792
yellow	GO:0043632	modification-dependent macromolecule cat...	391	35	19.78	1.76946	0.00073	0.0125722
yellow	GO:0051603	proteolysis involved in cellular protein...	406	36	20.54	1.75268	0.00073	0.0125722
yellow	GO:0002757	immune response-activating signal transd...	247	25	12.5	2	0.00074	0.0126242
yellow	GO:2000779	regulation of double-strand break repair	23	6	1.16	5.17241	0.00079	0.0133236
yellow	GO:0006378	mRNA polyadenylation	24	6	1.21	4.95868	0.00101	0.0161789
yellow	GO:0033036	macromolecule localization	1684	112	85.2	1.31455	0.00105	0.0165589
yellow	GO:0044237	cellular metabolic process	7133	395	360.89	1.09452	0.00106	0.0166842
yellow	GO:0006999	nuclear pore organization	10	4	0.51	7.84314	0.00107	0.0168254
yellow	GO:0015931	nucleobase-containing compound transport	146	17	7.39	2.30041	0.00111	0.0172708
yellow	GO:0043631	RNA polyadenylation	25	6	1.26	4.7619	0.00127	0.0191205
yellow	GO:0044257	cellular protein catabolic process	419	36	21.2	1.69811	0.00128	0.0192177
yellow	GO:0045089	positive regulation of innate immune res...	148	17	7.49	2.26969	0.0013	0.0194462
yellow	GO:0034166	toll-like receptor 10 signaling pathway	64	10	3.24	3.08642	0.0013	0.0194462
yellow	GO:0030163	protein catabolic process	512	42	25.9	1.62162	0.0013	0.0194462
yellow	GO:0006282	regulation of DNA repair	54	9	2.73	3.2967	0.00141	0.0208237
yellow	GO:0010498	proteasomal protein catabolic process	245	24	12.4	1.93548	0.00147	0.0214953
yellow	GO:0034146	toll-like receptor 5 signaling pathway	65	10	3.29	3.03951	0.00147	0.0214953
yellow	GO:0006974	response to DNA damage stimulus	612	48	30.96	1.55039	0.00156	0.0226485
yellow	GO:0038123	toll-like receptor TLR1:TLR2 signaling p...	66	10	3.34	2.99401	0.00165	0.0236597
yellow	GO:0038124	toll-like receptor TLR6:TLR2 signaling p...	66	10	3.34	2.99401	0.00165	0.0236597
yellow	GO:0031124	mRNA 3'-end processing	90	12	4.55	2.63736	0.00185	0.025778
yellow	GO:0044238	primary metabolic process	7135	393	360.99	1.08867	0.00201	0.0274897
yellow	GO:0051641	cellular localization	1825	118	92.33	1.27802	0.00211	0.0285455
yellow	GO:0002253	activation of immune response	267	25	13.51	1.85048	0.0022	0.0294207
yellow	GO:0015031	protein transport	1124	78	56.87	1.37155	0.0022	0.0294207
yellow	GO:0007077	mitotic nuclear envelope disassembly	37	7	1.87	3.74332	0.00223	0.0295307
yellow	GO:0016024	CDP-diacylglycerol biosynthetic process	12	4	0.61	6.55738	0.00232	0.0304992
yellow	GO:0045184	establishment of protein localization	1178	81	59.6	1.35906	0.00233	0.0306059
yellow	GO:0010827	regulation of glucose transport	70	10	3.54	2.82486	0.00259	0.0332956
yellow	GO:0034134	toll-like receptor 2 signaling pathway	71	10	3.59	2.78552	0.00289	0.0360144
yellow	GO:0030397	membrane disassembly	39	7	1.97	3.5533	0.00306	0.0376998
yellow	GO:0051081	nuclear envelope disassembly	39	7	1.97	3.5533	0.00306	0.0376998
yellow	GO:0000910	cytokinesis	121	14	6.12	2.28758	0.00315	0.0384882
yellow	GO:0002755	MyD88-dependent toll-like receptor signa...	72	10	3.64	2.74725	0.0032	0.0388657
yellow	GO:0010569	regulation of double-strand break repair...	13	4	0.66	6.06061	0.00321	0.0389
yellow	GO:0010869	regulation of receptor biosynthetic proc...	13	4	0.66	6.06061	0.00321	0.0389
yellow	GO:0046341	CDP-diacylglycerol metabolic process	13	4	0.66	6.06061	0.00321	0.0389
yellow	GO:0051298	centrosome duplication	30	6	1.52	3.94737	0.00343	0.0407469
yellow	GO:0044267	cellular protein metabolic process	2902	175	146.82	1.19194	0.00361	0.0424821
yellow	GO:0032392	DNA geometric change	31	6	1.57	3.82166	0.00407	0.0466474
yellow	GO:0071704	organic substance metabolic process	7336	400	371.16	1.0777	0.00441	0.0497386
yellow	GO:0051169	nuclear transport	312	27	15.79	1.70994	0.00452	0.0508734
yellow	GO:0018105	peptidyl-serine phosphorylation	113	13	5.72	2.27273	0.00457	0.0511884
yellow	GO:0002764	immune response-regulating signaling pat...	329	28	16.65	1.68168	0.00487	0.0539913
yellow	GO:0006396	RNA processing	633	47	32.03	1.46737	0.00504	0.0555732
yellow	GO:0090304	nucleic acid metabolic process	3758	219	190.13	1.15184	0.00504	0.0555732
yellow	GO:0007595	lactation	33	6	1.67	3.59281	0.00562	0.0605331
yellow	GO:0032800	receptor biosynthetic process	15	4	0.76	5.26316	0.00566	0.0607228
yellow	GO:0033962	cytoplasmic mRNA processing body assembl...	15	4	0.76	5.26316	0.00566	0.0607228
yellow	GO:0044265	cellular macromolecule catabolic process	690	50	34.91	1.43225	0.00619	0.065079
yellow	GO:0051693	actin filament capping	24	5	1.21	4.13223	0.00621	0.0652471
yellow	GO:0006997	nucleus organization	79	10	4	2.5	0.00628	0.065728
yellow	GO:0051301	cell division	449	35	22.72	1.54049	0.00714	0.0723559
yellow	GO:0006913	nucleocytoplasmic transport	308	26	15.58	1.66881	0.00724	0.0730962
yellow	GO:0060759	regulation of response to cytokine stimu...	69	9	3.49	2.5788	0.00768	0.0766352
yellow	GO:0008152	metabolic process	7671	414	388.11	1.06671	0.00807	0.0793111
yellow	GO:0000724	double-strand break repair via homologou...	58	8	2.93	2.73038	0.00839	0.0817648
yellow	GO:0001824	blastocyst development	58	8	2.93	2.73038	0.00839	0.0817648
yellow	GO:0018209	peptidyl-serine modification	122	13	6.17	2.10697	0.00867	0.0837414
yellow	GO:0001522	pseudouridine synthesis	17	4	0.86	4.65116	0.00911	0.0871636
yellow	GO:0050856	regulation of T cell receptor signaling ...	17	4	0.86	4.65116	0.00911	0.0871636
yellow	GO:0000725	recombinational repair	59	8	2.99	2.67559	0.00929	0.0883147
yellow	GO:0033554	cellular response to stress	1139	75	57.63	1.30141	0.00974	0.0916292
yellow	GO:0006139	nucleobase-containing compound metabolic...	4389	249	222.06	1.12132	0.00989	0.0927722
yellow	GO:0006513	protein monoubiquitination	37	6	1.87	3.20856	0.00995	0.09296
yellow	GO:0031349	positive regulation of defense response	181	17	9.16	1.8559	0.01025	0.0949993
yellow	GO:0045087	innate immune response	528	39	26.71	1.46013	0.01103	0.0991786
yellow	GO:0000186	activation of MAPKK activity	49	7	2.48	2.82258	0.01106	0.0993934
yellow	GO:0046718	viral entry into host cell	18	4	0.91	4.3956	0.01125	0.100601
yellow	GO:0051297	centrosome organization	61	8	3.09	2.589	0.0113	0.100882
yellow	GO:0000738	DNA catabolic process, exonucleolytic	10	3	0.51	5.88235	0.01184	0.104104
yellow	GO:0009620	response to fungus	10	3	0.51	5.88235	0.01184	0.104104
yellow	GO:0010225	response to UV-C	10	3	0.51	5.88235	0.01184	0.104104
yellow	GO:0051052	regulation of DNA metabolic process	184	17	9.31	1.82599	0.01195	0.104619
yellow	GO:0030835	negative regulation of actin filament de...	28	5	1.42	3.52113	0.01216	0.105944
yellow	GO:0033043	regulation of organelle organization	516	38	26.11	1.45538	0.01257	0.108644
yellow	GO:0050778	positive regulation of immune response	307	25	15.53	1.60979	0.01281	0.109959
yellow	GO:0001959	regulation of cytokine-mediated signalin...	63	8	3.19	2.50784	0.01361	0.115007
yellow	GO:0009057	macromolecule catabolic process	841	57	42.55	1.3396	0.01365	0.115225
yellow	GO:0032508	DNA duplex unwinding	29	5	1.47	3.40136	0.0141	0.117862
yellow	GO:0008645	hexose transport	89	10	4.5	2.22222	0.01418	0.118244
yellow	GO:0015758	glucose transport	89	10	4.5	2.22222	0.01418	0.118244
yellow	GO:0051649	establishment of localization in cell	1608	100	81.36	1.22911	0.01443	0.118752
yellow	GO:1901879	regulation of protein depolymerization	52	7	2.63	2.6616	0.01513	0.123367
yellow	GO:0015749	monosaccharide transport	90	10	4.55	2.1978	0.01525	0.123992
yellow	GO:0009299	mRNA transcription	11	3	0.56	5.35714	0.01567	0.126129
yellow	GO:0031023	microtubule organizing center organizati...	65	8	3.29	2.43161	0.01625	0.129009
yellow	GO:0006111	regulation of gluconeogenesis	20	4	1.01	3.9604	0.01644	0.130137
yellow	GO:0045022	early endosome to late endosome transpor...	20	4	1.01	3.9604	0.01644	0.130137
yellow	GO:0006892	post-Golgi vesicle-mediated transport	78	9	3.95	2.27848	0.01658	0.130926
yellow	GO:0032941	secretion by tissue	53	7	2.68	2.61194	0.0167	0.131682
yellow	GO:0008643	carbohydrate transport	105	11	5.31	2.07156	0.01695	0.133202
yellow	GO:0006200	ATP catabolic process	66	8	3.34	2.39521	0.0177	0.136331
yellow	GO:0071103	DNA conformation change	148	14	7.49	1.86916	0.01772	0.136421
yellow	GO:0048584	positive regulation of response to stimu...	923	61	46.7	1.30621	0.0178	0.136778
yellow	GO:0007098	centrosome cycle	42	6	2.12	2.83019	0.01816	0.138563
yellow	GO:0051168	nuclear export	120	12	6.07	1.97694	0.01821	0.138814
yellow	GO:0006998	nuclear envelope organization	54	7	2.73	2.5641	0.01838	0.139652
yellow	GO:0030260	entry into host cell	21	4	1.06	3.77358	0.01952	0.144478
yellow	GO:0044409	entry into host	21	4	1.06	3.77358	0.01952	0.144478
yellow	GO:0051806	entry into cell of other organism involv...	21	4	1.06	3.77358	0.01952	0.144478
yellow	GO:0051828	entry into other organism involved in sy...	21	4	1.06	3.77358	0.01952	0.144478
yellow	GO:0052126	movement in host environment	21	4	1.06	3.77358	0.01952	0.144478
yellow	GO:0052192	movement in environment of other organis...	21	4	1.06	3.77358	0.01952	0.144478
yellow	GO:0061515	myeloid cell development	21	4	1.06	3.77358	0.01952	0.144478
yellow	GO:0006379	mRNA cleavage	12	3	0.61	4.91803	0.02012	0.147568
yellow	GO:0044763	single-organism cellular process	7522	403	380.57	1.05894	0.02031	0.148227
yellow	GO:0016192	vesicle-mediated transport	809	54	40.93	1.31933	0.02111	0.152492
yellow	GO:0030834	regulation of actin filament depolymeriz...	32	5	1.62	3.08642	0.02113	0.152501
yellow	GO:0038093	Fc receptor signaling pathway	181	16	9.16	1.74672	0.02115	0.152578
yellow	GO:0006508	proteolysis	758	51	38.35	1.32986	0.02161	0.153515
yellow	GO:0034504	protein localization to nucleus	212	18	10.73	1.67754	0.02183	0.154605
yellow	GO:0044770	cell cycle phase transition	436	32	22.06	1.45059	0.02183	0.154605
yellow	GO:0000209	protein polyubiquitination	167	15	8.45	1.77515	0.02209	0.155634
yellow	GO:1901880	negative regulation of protein depolymer...	44	6	2.23	2.69058	0.02246	0.157899
yellow	GO:0046825	regulation of protein export from nucleu...	22	4	1.11	3.6036	0.02293	0.158802
yellow	GO:0034641	cellular nitrogen compound metabolic pro...	4679	260	236.73	1.0983	0.02323	0.160131
yellow	GO:0044772	mitotic cell cycle phase transition	373	28	18.87	1.48384	0.02369	0.162681
yellow	GO:0032768	regulation of monooxygenase activity	33	5	1.67	2.99401	0.0239	0.163571
yellow	GO:0006397	mRNA processing	390	29	19.73	1.46984	0.02415	0.165143
yellow	GO:0009128	purine nucleoside monophosphate cataboli...	70	8	3.54	2.25989	0.02445	0.166635
yellow	GO:0009158	ribonucleoside monophosphate catabolic p...	70	8	3.54	2.25989	0.02445	0.166635
yellow	GO:0009169	purine ribonucleoside monophosphate cata...	70	8	3.54	2.25989	0.02445	0.166635
yellow	GO:0006369	termination of RNA polymerase II transcr...	45	6	2.28	2.63158	0.02484	0.168565
yellow	GO:0043242	negative regulation of protein complex d...	45	6	2.28	2.63158	0.02484	0.168565
yellow	GO:0007099	centriole replication	13	3	0.66	4.54545	0.0252	0.169823
yellow	GO:0060216	definitive hemopoiesis	13	3	0.66	4.54545	0.0252	0.169823
yellow	GO:0071108	protein K48-linked deubiquitination	13	3	0.66	4.54545	0.0252	0.169823
yellow	GO:1901222	regulation of NIK/NF-kappaB cascade	13	3	0.66	4.54545	0.0252	0.169823
yellow	GO:0006260	DNA replication	247	20	12.5	1.6	0.02561	0.17152
yellow	GO:0032434	regulation of proteasomal ubiquitin-depe...	58	7	2.93	2.38908	0.02628	0.174717
yellow	GO:0050776	regulation of immune response	476	34	24.08	1.41196	0.0263	0.174778
yellow	GO:0006654	phosphatidic acid biosynthetic process	23	4	1.16	3.44828	0.02667	0.175507
yellow	GO:0033598	mammary gland epithelial cell proliferat...	23	4	1.16	3.44828	0.02667	0.175507
yellow	GO:0046473	phosphatidic acid metabolic process	23	4	1.16	3.44828	0.02667	0.175507
yellow	GO:0050854	regulation of antigen receptor-mediated ...	23	4	1.16	3.44828	0.02667	0.175507
yellow	GO:0006810	transport	2749	159	139.08	1.14323	0.02691	0.176663
yellow	GO:0009125	nucleoside monophosphate catabolic proce...	72	8	3.64	2.1978	0.02841	0.183045
yellow	GO:0007589	body fluid secretion	59	7	2.99	2.34114	0.02857	0.183713
yellow	GO:0046483	heterocycle metabolic process	4505	250	227.93	1.09683	0.02896	0.185434
yellow	GO:0006725	cellular aromatic compound metabolic pro...	4506	250	227.98	1.09659	0.02926	0.186254
yellow	GO:0031347	regulation of defense response	315	24	15.94	1.50565	0.02963	0.187798
yellow	GO:0016482	cytoplasmic transport	686	46	34.71	1.32527	0.02975	0.187886
yellow	GO:0006312	mitotic recombination	35	5	1.77	2.82486	0.03011	0.189059
yellow	GO:0030837	negative regulation of actin filament po...	35	5	1.77	2.82486	0.03011	0.189059
yellow	GO:0030219	megakaryocyte differentiation	24	4	1.21	3.30579	0.03077	0.192165
yellow	GO:0051261	protein depolymerization	60	7	3.04	2.30263	0.03099	0.192935
yellow	GO:0007243	intracellular protein kinase cascade	723	48	36.58	1.31219	0.0312	0.193957
yellow	GO:0019538	protein metabolic process	3314	188	167.67	1.12125	0.03123	0.194058
yellow	GO:0034613	cellular protein localization	917	59	46.39	1.27183	0.03154	0.195102
yellow	GO:0051234	establishment of localization	2801	161	141.71	1.13612	0.03175	0.195618
yellow	GO:0050852	T cell receptor signaling pathway	74	8	3.74	2.13904	0.03281	0.198937
yellow	GO:0002768	immune response-regulating cell surface ...	238	19	12.04	1.57807	0.03297	0.199623
yellow	GO:0043393	regulation of protein binding	88	9	4.45	2.02247	0.03345	0.202364
yellow	GO:0030042	actin filament depolymerization	36	5	1.82	2.74725	0.03356	0.202668
yellow	GO:0030433	ER-associated protein catabolic process	36	5	1.82	2.74725	0.03356	0.202668
yellow	GO:0034508	centromere complex assembly	36	5	1.82	2.74725	0.03356	0.202668
yellow	GO:0071702	organic substance transport	1629	98	82.42	1.18903	0.03459	0.205983
yellow	GO:0070727	cellular macromolecule localization	922	59	46.65	1.26474	0.03459	0.205983
yellow	GO:0000722	telomere maintenance via recombination	25	4	1.26	3.1746	0.03521	0.207624
yellow	GO:0006336	DNA replication-independent nucleosome a...	25	4	1.26	3.1746	0.03521	0.207624
yellow	GO:0034080	CENP-A containing nucleosome assembly at...	25	4	1.26	3.1746	0.03521	0.207624
yellow	GO:0034502	protein localization to chromosome	25	4	1.26	3.1746	0.03521	0.207624
turquoise	GO:0044260	cellular macromolecule metabolic process	5654	1154	991.54	1.16385	2.6e-16	5.56776e-14
turquoise	GO:0090304	nucleic acid metabolic process	3758	810	659.04	1.22906	2.3e-15	3.78106e-13
turquoise	GO:0006139	nucleobase-containing compound metabolic...	4389	918	769.69	1.19269	3.4e-14	4.72949e-12
turquoise	GO:0010467	gene expression	3722	794	652.72	1.21645	9.6e-14	1.19267e-11
turquoise	GO:0016070	RNA metabolic process	3311	718	580.65	1.23655	9.7e-14	1.19597e-11
turquoise	GO:0006725	cellular aromatic compound metabolic pro...	4506	935	790.21	1.18323	1.6e-13	1.84681e-11
turquoise	GO:0046483	heterocycle metabolic process	4505	934	790.04	1.18222	2.1e-13	2.37344e-11
turquoise	GO:1901360	organic cyclic compound metabolic proces...	4644	951	814.41	1.16772	3.6e-12	3.38671e-10
turquoise	GO:0034641	cellular nitrogen compound metabolic pro...	4679	954	820.55	1.16263	1.1e-11	9.18077e-10
turquoise	GO:0006396	RNA processing	633	177	111.01	1.59445	1.4e-11	1.11146e-09
turquoise	GO:0043170	macromolecule metabolic process	6064	1194	1063.44	1.12277	2.9e-11	2.15514e-09
turquoise	GO:0006807	nitrogen compound metabolic process	4965	987	870.71	1.13356	3.4e-09	1.82624e-07
turquoise	GO:0034645	cellular macromolecule biosynthetic proc...	3494	713	612.74	1.16363	5.6e-08	2.4304e-06
turquoise	GO:0044237	cellular metabolic process	7133	1352	1250.91	1.08081	6.3e-08	2.72693e-06
turquoise	GO:0008380	RNA splicing	317	93	55.59	1.67296	1.1e-07	4.57864e-06
turquoise	GO:0000377	RNA splicing, via transesterification re...	207	67	36.3	1.84573	1.3e-07	5.3428e-06
turquoise	GO:0000398	mRNA splicing, via spliceosome	207	67	36.3	1.84573	1.3e-07	5.3428e-06
turquoise	GO:0006351	transcription, DNA-dependent	2621	547	459.64	1.19006	2.5e-07	1.00962e-05
turquoise	GO:0000375	RNA splicing, via transesterification re...	212	67	37.18	1.80204	3.5e-07	1.37924e-05
turquoise	GO:0007049	cell cycle	1321	298	231.66	1.28637	4e-07	1.55e-05
turquoise	GO:0044238	primary metabolic process	7135	1345	1251.26	1.07492	4.9e-07	1.88084e-05
turquoise	GO:0009059	macromolecule biosynthetic process	3562	716	624.66	1.14622	7.4e-07	2.76862e-05
turquoise	GO:0034470	ncRNA processing	204	64	35.78	1.78871	8.5e-07	3.14403e-05
turquoise	GO:0022613	ribonucleoprotein complex biogenesis	251	75	44.02	1.70377	8.5e-07	3.14403e-05
turquoise	GO:0006397	mRNA processing	390	106	68.39	1.54993	9.5e-07	3.50595e-05
turquoise	GO:0071704	organic substance metabolic process	7336	1372	1286.51	1.06645	3.1e-06	0.000107118
turquoise	GO:0051171	regulation of nitrogen compound metaboli...	2925	593	512.95	1.15606	4.2e-06	0.000143002
turquoise	GO:0008152	metabolic process	7671	1425	1345.26	1.05927	7.8e-06	0.000250879
turquoise	GO:0051252	regulation of RNA metabolic process	2462	504	431.76	1.16732	1.1e-05	0.000339063
turquoise	GO:2000112	regulation of cellular macromolecule bio...	2620	533	459.47	1.16003	1.1e-05	0.000339063
turquoise	GO:0060255	regulation of macromolecule metabolic pr...	3509	695	615.37	1.1294	1.3e-05	0.000395467
turquoise	GO:0016071	mRNA metabolic process	594	144	104.17	1.38236	1.3e-05	0.000395467
turquoise	GO:0032774	RNA biosynthetic process	2704	547	474.2	1.15352	1.6e-05	0.000478676
turquoise	GO:0019219	regulation of nucleobase-containing comp...	2850	573	499.8	1.14646	2e-05	0.000588608
turquoise	GO:0010556	regulation of macromolecule biosynthetic...	2669	539	468.06	1.15156	2.4e-05	0.000698748
turquoise	GO:0043414	macromolecule methylation	138	44	24.2	1.81818	2.7e-05	0.000779122
turquoise	GO:0010468	regulation of gene expression	2809	562	492.61	1.14086	4.6e-05	0.00127105
turquoise	GO:2001141	regulation of RNA biosynthetic process	2399	486	420.71	1.15519	5.2e-05	0.0014105
turquoise	GO:0019438	aromatic compound biosynthetic process	2974	591	521.55	1.13316	5.9e-05	0.00157672
turquoise	GO:0034660	ncRNA metabolic process	289	77	50.68	1.51934	6e-05	0.00159559
turquoise	GO:0000278	mitotic cell cycle	771	176	135.21	1.30168	6.2e-05	0.0016434
turquoise	GO:0022402	cell cycle process	1011	223	177.3	1.25776	6.6e-05	0.0017325
turquoise	GO:0006355	regulation of transcription, DNA-depende...	2383	482	417.9	1.15339	6.8e-05	0.00177072
turquoise	GO:0031323	regulation of cellular metabolic process	3706	723	649.92	1.11244	6.8e-05	0.00177072
turquoise	GO:0080090	regulation of primary metabolic process	3634	710	637.29	1.11409	6.8e-05	0.00177072
turquoise	GO:0034654	nucleobase-containing compound biosynthe...	2926	581	513.13	1.13227	7.9e-05	0.00201209
turquoise	GO:0006977	DNA damage response, signal transduction...	63	24	11.05	2.17195	8.5e-05	0.00213155
turquoise	GO:0072413	signal transduction involved in mitotic ...	63	24	11.05	2.17195	8.5e-05	0.00213155
turquoise	GO:0072431	signal transduction involved in mitotic ...	63	24	11.05	2.17195	8.5e-05	0.00213155
turquoise	GO:0008334	histone mRNA metabolic process	25	13	4.38	2.96804	9.1e-05	0.00226111
turquoise	GO:0072401	signal transduction involved in DNA inte...	64	24	11.22	2.13904	0.00011	0.00263272
turquoise	GO:0072422	signal transduction involved in DNA dama...	64	24	11.22	2.13904	0.00011	0.00263272
turquoise	GO:0044271	cellular nitrogen compound biosynthetic ...	3029	598	531.19	1.12577	0.00012	0.00285944
turquoise	GO:0018130	heterocycle biosynthetic process	2982	589	522.95	1.1263	0.00013	0.00308869
turquoise	GO:0072395	signal transduction involved in cell cyc...	65	24	11.4	2.10526	0.00015	0.00349749
turquoise	GO:0044249	cellular biosynthetic process	4180	804	733.04	1.0968	0.00015	0.00349749
turquoise	GO:0006261	DNA-dependent DNA replication	97	32	17.01	1.88125	0.00016	0.00369886
turquoise	GO:0032259	methylation	149	44	26.13	1.68389	0.0002	0.00447115
turquoise	GO:0048193	Golgi vesicle transport	180	51	31.57	1.61546	0.00021	0.00465
turquoise	GO:0071156	regulation of cell cycle arrest	86	29	15.08	1.92308	0.00021	0.00465
turquoise	GO:0051443	positive regulation of ubiquitin-protein...	78	27	13.68	1.97368	0.00021	0.00465
turquoise	GO:0000209	protein polyubiquitination	167	48	29.29	1.63878	0.00022	0.00485821
turquoise	GO:0006996	organelle organization	2102	424	368.63	1.1502	0.00028	0.00594909
turquoise	GO:0042254	ribosome biogenesis	151	44	26.48	1.66163	0.00028	0.00594909
turquoise	GO:1901362	organic cyclic compound biosynthetic pro...	3058	599	536.28	1.11695	0.00028	0.00594909
turquoise	GO:0031570	DNA integrity checkpoint	134	40	23.5	1.70213	0.0003	0.00627571
turquoise	GO:0006369	termination of RNA polymerase II transcr...	45	18	7.89	2.28137	0.00032	0.00661753
turquoise	GO:0006974	response to DNA damage stimulus	612	140	107.33	1.30439	0.00032	0.00661753
turquoise	GO:0031326	regulation of cellular biosynthetic proc...	2765	545	484.9	1.12394	0.00033	0.00680703
turquoise	GO:0044773	mitotic DNA damage checkpoint	76	26	13.33	1.95049	0.00034	0.00696038
turquoise	GO:0071158	positive regulation of cell cycle arrest	76	26	13.33	1.95049	0.00034	0.00696038
turquoise	GO:1901576	organic substance biosynthetic process	4251	812	745.49	1.08922	0.00037	0.00742509
turquoise	GO:0051329	interphase of mitotic cell cycle	221	59	38.76	1.52219	0.0004	0.00781513
turquoise	GO:0006353	DNA-dependent transcription, termination	81	27	14.2	1.90141	0.00042	0.00812782
turquoise	GO:0051351	positive regulation of ligase activity	81	27	14.2	1.90141	0.00042	0.00812782
turquoise	GO:0009889	regulation of biosynthetic process	2784	547	488.23	1.12037	0.00044	0.00846454
turquoise	GO:0000077	DNA damage checkpoint	128	38	22.45	1.69265	0.00048	0.00914754
turquoise	GO:0051276	chromosome organization	643	145	112.76	1.28592	0.00049	0.00928376
turquoise	GO:0038061	NIK/NF-kappaB cascade	16	9	2.81	3.20285	0.00054	0.0100211
turquoise	GO:0031571	mitotic G1 DNA damage checkpoint	70	24	12.28	1.9544	0.00054	0.0100211
turquoise	GO:0044783	G1 DNA damage checkpoint	70	24	12.28	1.9544	0.00054	0.0100211
turquoise	GO:0051437	positive regulation of ubiquitin-protein...	70	24	12.28	1.9544	0.00054	0.0100211
turquoise	GO:0006260	DNA replication	247	64	43.32	1.47738	0.00055	0.010195
turquoise	GO:0022616	DNA strand elongation	36	15	6.31	2.37718	0.00059	0.0107649
turquoise	GO:0044770	cell cycle phase transition	436	103	76.46	1.34711	0.00061	0.0110431
turquoise	GO:0051438	regulation of ubiquitin-protein ligase a...	91	29	15.96	1.81704	0.00061	0.0110431
turquoise	GO:0009058	biosynthetic process	4307	819	755.31	1.08432	0.00063	0.0112921
turquoise	GO:0051325	interphase	225	59	39.46	1.49518	0.00065	0.0115741
turquoise	GO:0044774	mitotic DNA integrity checkpoint	79	26	13.85	1.87726	0.00067	0.0118912
turquoise	GO:0006304	DNA modification	59	21	10.35	2.02899	0.00068	0.0120033
turquoise	GO:0051352	negative regulation of ligase activity	71	24	12.45	1.92771	0.00069	0.012101
turquoise	GO:0051444	negative regulation of ubiquitin-protein...	71	24	12.45	1.92771	0.00069	0.012101
turquoise	GO:0051436	negative regulation of ubiquitin-protein...	67	23	11.75	1.95745	0.00069	0.012101
turquoise	GO:0035020	regulation of Rac protein signal transdu...	26	12	4.56	2.63158	0.00069	0.012101
turquoise	GO:0006271	DNA strand elongation involved in DNA re...	33	14	5.79	2.41796	0.00072	0.0124792
turquoise	GO:0000075	cell cycle checkpoint	212	56	37.18	1.50619	0.00072	0.0124792
turquoise	GO:0019222	regulation of metabolic process	4021	767	705.16	1.0877	0.00076	0.0128576
turquoise	GO:2000045	regulation of G1/S transition of mitotic...	105	32	18.41	1.73819	0.00079	0.0133236
turquoise	GO:0031398	positive regulation of protein ubiquitin...	127	37	22.27	1.66143	0.00083	0.0138974
turquoise	GO:0006383	transcription from RNA polymerase III pr...	52	19	9.12	2.08333	0.00083	0.0138974
turquoise	GO:0006521	regulation of cellular amino acid metabo...	52	19	9.12	2.08333	0.00083	0.0138974
turquoise	GO:1901988	negative regulation of cell cycle phase ...	228	59	39.98	1.47574	0.00092	0.0151549
turquoise	GO:0071826	ribonucleoprotein complex subunit organi...	128	37	22.45	1.64811	0.00097	0.0157239
turquoise	GO:2000134	negative regulation of G1/S transition o...	85	27	14.91	1.81087	0.00098	0.0158072
turquoise	GO:0010948	negative regulation of cell cycle proces...	257	65	45.07	1.4422	0.001	0.0160979
turquoise	GO:0031145	anaphase-promoting complex-dependent pro...	81	26	14.2	1.83099	0.00102	0.016291
turquoise	GO:0000280	nuclear division	325	79	56.99	1.38621	0.00108	0.0168847
turquoise	GO:0007067	mitosis	325	79	56.99	1.38621	0.00108	0.0168847
turquoise	GO:0051340	regulation of ligase activity	94	29	16.48	1.75971	0.0011	0.0171316
turquoise	GO:0006364	rRNA processing	107	32	18.76	1.70576	0.00112	0.0173931
turquoise	GO:0031124	mRNA 3'-end processing	90	28	15.78	1.7744	0.00115	0.0177237
turquoise	GO:0048285	organelle fission	350	84	61.38	1.36852	0.00115	0.0177237
turquoise	GO:0016601	Rac protein signal transduction	38	15	6.66	2.25225	0.00116	0.0178609
turquoise	GO:0006259	DNA metabolic process	764	166	133.98	1.23899	0.0012	0.0183208
turquoise	GO:0008033	tRNA processing	74	24	12.98	1.849	0.00133	0.0198221
turquoise	GO:0031123	RNA 3'-end processing	104	31	18.24	1.69956	0.00141	0.0208237
turquoise	GO:0016072	rRNA metabolic process	113	33	19.82	1.66498	0.00148	0.0216221
turquoise	GO:0022618	ribonucleoprotein complex assembly	122	35	21.4	1.63551	0.00152	0.0220875
turquoise	GO:0022403	cell cycle phase	247	62	43.32	1.43121	0.00157	0.0227531
turquoise	GO:1901987	regulation of cell cycle phase transitio...	257	64	45.07	1.42001	0.00165	0.0236597
turquoise	GO:0000387	spliceosomal snRNP assembly	32	13	5.61	2.31729	0.0018	0.0251459
turquoise	GO:0000082	G1/S transition of mitotic cell cycle	197	51	34.55	1.47612	0.00196	0.0269645
turquoise	GO:0051439	regulation of ubiquitin-protein ligase a...	76	24	13.33	1.80045	0.002	0.027399
turquoise	GO:0016571	histone methylation	72	23	12.63	1.82106	0.00208	0.0282807
turquoise	GO:0032508	DNA duplex unwinding	29	12	5.09	2.35756	0.00223	0.0295307
turquoise	GO:0043928	exonucleolytic nuclear-transcribed mRNA ...	29	12	5.09	2.35756	0.00223	0.0295307
turquoise	GO:0006281	DNA repair	393	91	68.92	1.32037	0.00236	0.0308754
turquoise	GO:0009303	rRNA transcription	19	9	3.33	2.7027	0.00262	0.0335752
turquoise	GO:0000291	nuclear-transcribed mRNA catabolic proce...	30	12	5.26	2.28137	0.00313	0.0383013
turquoise	GO:0071044	histone mRNA catabolic process	10	6	1.75	3.42857	0.00318	0.0387674
turquoise	GO:0002479	antigen processing and presentation of e...	66	21	11.57	1.81504	0.00336	0.0400615
turquoise	GO:0044772	mitotic cell cycle phase transition	373	86	65.41	1.31478	0.00347	0.041162
turquoise	GO:0006284	base-excision repair	38	14	6.66	2.1021	0.00359	0.0423079
turquoise	GO:0006305	DNA alkylation	38	14	6.66	2.1021	0.00359	0.0423079
turquoise	GO:0006306	DNA methylation	38	14	6.66	2.1021	0.00359	0.0423079
turquoise	GO:0010833	telomere maintenance via telomere length...	38	14	6.66	2.1021	0.00359	0.0423079
turquoise	GO:0044728	DNA methylation or demethylation	46	16	8.07	1.98265	0.00373	0.0436105
turquoise	GO:0006270	DNA replication initiation	27	11	4.73	2.32558	0.0039	0.0451762
turquoise	GO:0090004	positive regulation of establishment of ...	20	9	3.51	2.5641	0.00403	0.0463521
turquoise	GO:0042590	antigen processing and presentation of e...	67	21	11.75	1.78723	0.00411	0.0469076
turquoise	GO:0032392	DNA geometric change	31	12	5.44	2.20588	0.0043	0.0487683
turquoise	GO:0000288	nuclear-transcribed mRNA catabolic proce...	59	19	10.35	1.83575	0.00444	0.0500422
turquoise	GO:0006312	mitotic recombination	35	13	6.14	2.11726	0.00456	0.0511884
turquoise	GO:0000245	spliceosomal complex assembly	39	14	6.84	2.04678	0.00471	0.0524677
turquoise	GO:0002474	antigen processing and presentation of p...	85	25	14.91	1.67673	0.00474	0.0527657
turquoise	GO:0040029	regulation of gene expression, epigeneti...	130	35	22.8	1.53509	0.0048	0.0533242
turquoise	GO:0010498	proteasomal protein catabolic process	245	59	42.97	1.37305	0.00539	0.0586379
turquoise	GO:0009451	RNA modification	73	22	12.8	1.71875	0.00568	0.0608171
turquoise	GO:0007093	mitotic cell cycle checkpoint	136	36	23.85	1.50943	0.00575	0.0614857
turquoise	GO:0006479	protein methylation	91	26	15.96	1.62907	0.00613	0.0647409
turquoise	GO:0008213	protein alkylation	91	26	15.96	1.62907	0.00613	0.0647409
turquoise	GO:0043161	proteasomal ubiquitin-dependent protein ...	232	56	40.69	1.37626	0.00625	0.0654982
turquoise	GO:1901991	negative regulation of mitotic cell cycl...	151	39	26.48	1.47281	0.0065	0.0675096
turquoise	GO:0019941	modification-dependent protein catabolic...	387	87	67.87	1.28186	0.00676	0.0695442
turquoise	GO:0006511	ubiquitin-dependent protein catabolic pr...	382	86	66.99	1.28377	0.00679	0.0696767
turquoise	GO:0044267	cellular protein metabolic process	2902	553	508.92	1.08661	0.00693	0.0706678
turquoise	GO:0031396	regulation of protein ubiquitination	176	44	30.86	1.42579	0.00753	0.0755088
turquoise	GO:0010564	regulation of cell cycle process	394	88	69.1	1.27352	0.00774	0.077045
turquoise	GO:0043412	macromolecule modification	2303	444	403.88	1.09934	0.00775	0.0770973
turquoise	GO:0016569	covalent chromatin modification	279	65	48.93	1.32843	0.00798	0.0787596
turquoise	GO:0016570	histone modification	275	64	48.23	1.32697	0.00863	0.0835534
turquoise	GO:0051603	proteolysis involved in cellular protein...	406	90	71.2	1.26404	0.00877	0.0846068
turquoise	GO:0031397	negative regulation of protein ubiquitin...	98	27	17.19	1.57068	0.00891	0.0857035
turquoise	GO:0043632	modification-dependent macromolecule cat...	391	87	68.57	1.26878	0.00893	0.0857438
turquoise	GO:0006891	intra-Golgi vesicle-mediated transport	26	10	4.56	2.19298	0.00938	0.0890054
turquoise	GO:0033554	cellular response to stress	1139	229	199.75	1.14643	0.00978	0.0918992
turquoise	GO:0007250	activation of NF-kappaB-inducing kinase ...	12	6	2.1	2.85714	0.01018	0.094674
turquoise	GO:1901990	regulation of mitotic cell cycle phase t...	184	45	32.27	1.39448	0.01044	0.0963761
turquoise	GO:0001510	RNA methylation	19	8	3.33	2.4024	0.01069	0.0976866
turquoise	GO:0006297	nucleotide-excision repair, DNA gap fill...	19	8	3.33	2.4024	0.01069	0.0976866
turquoise	GO:0032007	negative regulation of TOR signaling cas...	19	8	3.33	2.4024	0.01069	0.0976866
turquoise	GO:0002478	antigen processing and presentation of e...	146	37	25.6	1.44531	0.01079	0.097922
turquoise	GO:0030330	DNA damage response, signal transduction...	100	27	17.54	1.53934	0.01177	0.103712
turquoise	GO:0006302	double-strand break repair	119	31	20.87	1.48539	0.0125	0.108211
turquoise	GO:0033238	regulation of cellular amine metabolic p...	69	20	12.1	1.65289	0.0128	0.109931
turquoise	GO:0006892	post-Golgi vesicle-mediated transport	78	22	13.68	1.60819	0.013	0.11109
turquoise	GO:0042770	signal transduction in response to DNA d...	110	29	19.29	1.50337	0.01301	0.11109
turquoise	GO:0007004	telomere maintenance via telomerase	16	7	2.81	2.4911	0.01323	0.112673
turquoise	GO:0019884	antigen processing and presentation of e...	148	37	25.95	1.42582	0.01343	0.113959
turquoise	GO:0032200	telomere organization	65	19	11.4	1.66667	0.0137	0.115467
turquoise	GO:0051817	modification of morphology or physiology...	333	74	58.4	1.26712	0.01544	0.12533
turquoise	GO:0019048	modulation by virus of host morphology o...	318	71	55.77	1.27309	0.01568	0.126129
turquoise	GO:0070498	interleukin-1-mediated signaling pathway	13	6	2.28	2.63158	0.01613	0.128495
turquoise	GO:0071108	protein K48-linked deubiquitination	13	6	2.28	2.63158	0.01613	0.128495
turquoise	GO:1901222	regulation of NIK/NF-kappaB cascade	13	6	2.28	2.63158	0.01613	0.128495
turquoise	GO:0016567	protein ubiquitination	509	108	89.26	1.20995	0.01632	0.129502
turquoise	GO:0035821	modification of morphology or physiology...	334	74	58.57	1.26345	0.01653	0.130595
turquoise	GO:0046782	regulation of viral transcription	62	18	10.87	1.65593	0.01734	0.134834
turquoise	GO:0090002	establishment of protein localization to...	71	20	12.45	1.60643	0.01759	0.13587
turquoise	GO:0044003	modification by symbiont of host morphol...	320	71	56.12	1.26515	0.018	0.137664
turquoise	GO:0000724	double-strand break repair via homologou...	58	17	10.17	1.67158	0.01858	0.14045
turquoise	GO:0000084	S phase of mitotic cell cycle	10	5	1.75	2.85714	0.01909	0.142593
turquoise	GO:0006623	protein targeting to vacuole	10	5	1.75	2.85714	0.01909	0.142593
turquoise	GO:0072666	establishment of protein localization to...	10	5	1.75	2.85714	0.01909	0.142593
turquoise	GO:0001522	pseudouridine synthesis	17	7	2.98	2.34899	0.01915	0.142704
turquoise	GO:0006278	RNA-dependent DNA replication	17	7	2.98	2.34899	0.01915	0.142704
turquoise	GO:0045132	meiotic chromosome segregation	17	7	2.98	2.34899	0.01915	0.142704
turquoise	GO:0016197	endosomal transport	142	35	24.9	1.40562	0.01959	0.144724
turquoise	GO:0044257	cellular protein catabolic process	419	90	73.48	1.22482	0.0198	0.145944
turquoise	GO:0072331	signal transduction by p53 class mediato...	128	32	22.45	1.42539	0.02042	0.148902
brown	GO:0044283	small molecule biosynthetic process	340	59	19.56	3.01636	1.1e-14	1.65764e-12
brown	GO:0044711	single-organism biosynthetic process	344	59	19.79	2.9813	2e-14	2.88053e-12
brown	GO:0006695	cholesterol biosynthetic process	40	19	2.3	8.26087	8.9e-14	1.12285e-11
brown	GO:0016126	sterol biosynthetic process	45	20	2.59	7.72201	9.6e-14	1.19267e-11
brown	GO:0006629	lipid metabolic process	878	101	50.51	1.9996	5.2e-12	4.70167e-10
brown	GO:0008610	lipid biosynthetic process	449	64	25.83	2.47774	9.1e-12	7.9625e-10
brown	GO:0046165	alcohol biosynthetic process	109	28	6.27	4.46571	1e-11	8.52094e-10
brown	GO:0016125	sterol metabolic process	97	25	5.58	4.48029	1.2e-10	8.20588e-09
brown	GO:0008203	cholesterol metabolic process	90	24	5.18	4.6332	1.4e-10	9.33811e-09
brown	GO:0044255	cellular lipid metabolic process	678	81	39	2.07692	1.4e-10	9.33811e-09
brown	GO:0006694	steroid biosynthetic process	101	25	5.81	4.30293	3.2e-10	2.0186e-08
brown	GO:1901617	organic hydroxy compound biosynthetic pr...	129	28	7.42	3.77358	7.4e-10	4.28594e-08
brown	GO:0032787	monocarboxylic acid metabolic process	321	48	18.47	2.59881	8.2e-10	4.73245e-08
brown	GO:1901615	organic hydroxy compound metabolic proce...	321	47	18.47	2.54467	2.5e-09	1.38393e-07
brown	GO:0008202	steroid metabolic process	179	32	10.3	3.1068	7.8e-09	4.01725e-07
brown	GO:0006066	alcohol metabolic process	263	40	15.13	2.64375	1.4e-08	6.70147e-07
brown	GO:0019752	carboxylic acid metabolic process	685	76	39.41	1.92844	1.6e-08	7.54783e-07
brown	GO:0006631	fatty acid metabolic process	238	37	13.69	2.7027	2.7e-08	1.21724e-06
brown	GO:0043436	oxoacid metabolic process	785	80	45.16	1.77148	2.6e-07	1.03968e-05
brown	GO:0006082	organic acid metabolic process	791	80	45.5	1.75824	3.6e-07	1.41181e-05
brown	GO:0035338	long-chain fatty-acyl-CoA biosynthetic p...	15	8	0.86	9.30233	5.2e-07	1.98197e-05
brown	GO:0016053	organic acid biosynthetic process	223	32	12.83	2.49415	1.5e-06	5.425e-05
brown	GO:0046394	carboxylic acid biosynthetic process	223	32	12.83	2.49415	1.5e-06	5.425e-05
brown	GO:0046949	fatty-acyl-CoA biosynthetic process	17	8	0.98	8.16327	1.8e-06	6.42434e-05
brown	GO:0006633	fatty acid biosynthetic process	97	19	5.58	3.40502	2.1e-06	7.42989e-05
brown	GO:0008299	isoprenoid biosynthetic process	18	8	1.04	7.69231	3e-06	0.000103883
brown	GO:0044281	small molecule metabolic process	2053	163	118.1	1.38019	3.6e-06	0.000123347
brown	GO:0006641	triglyceride metabolic process	77	16	4.43	3.61174	6.1e-06	0.000203855
brown	GO:0035384	thioester biosynthetic process	32	10	1.84	5.43478	7.5e-06	0.000244614
brown	GO:0071616	acyl-CoA biosynthetic process	32	10	1.84	5.43478	7.5e-06	0.000244614
brown	GO:0035336	long-chain fatty-acyl-CoA metabolic proc...	20	8	1.15	6.95652	7.8e-06	0.000250879
brown	GO:0072330	monocarboxylic acid biosynthetic process	135	22	7.77	2.8314	8.3e-06	0.000264868
brown	GO:0006639	acylglycerol metabolic process	81	16	4.66	3.43348	1.2e-05	0.000368491
brown	GO:0006638	neutral lipid metabolic process	82	16	4.72	3.38983	1.4e-05	0.000424302
brown	GO:0035337	fatty-acyl-CoA metabolic process	23	8	1.32	6.06061	2.6e-05	0.000752936
brown	GO:0044710	single-organism metabolic process	2453	183	141.11	1.29686	3.8e-05	0.00106813
brown	GO:0046486	glycerolipid metabolic process	252	31	14.5	2.13793	4.9e-05	0.00134029
brown	GO:0019432	triglyceride biosynthetic process	47	11	2.7	4.07407	5.4e-05	0.00146231
brown	GO:0045017	glycerolipid biosynthetic process	197	26	11.33	2.29479	6.1e-05	0.00161954
brown	GO:0006720	isoprenoid metabolic process	65	13	3.74	3.47594	6.8e-05	0.00177072
brown	GO:0046460	neutral lipid biosynthetic process	49	11	2.82	3.90071	8.2e-05	0.00207228
brown	GO:0046463	acylglycerol biosynthetic process	49	11	2.82	3.90071	8.2e-05	0.00207228
brown	GO:0006637	acyl-CoA metabolic process	59	12	3.39	3.53982	0.00011	0.00263272
brown	GO:0035383	thioester metabolic process	59	12	3.39	3.53982	0.00011	0.00263272
brown	GO:0015908	fatty acid transport	46	10	2.65	3.77358	0.00023	0.00503802
brown	GO:0006732	coenzyme metabolic process	170	22	9.78	2.24949	0.00029	0.00611367
brown	GO:0009416	response to light stimulus	209	25	12.02	2.07987	0.0004	0.00781513
brown	GO:0008654	phospholipid biosynthetic process	187	23	10.76	2.13755	0.00045	0.0086365
brown	GO:0015718	monocarboxylic acid transport	70	12	4.03	2.97767	0.00058	0.0106181
brown	GO:0006644	phospholipid metabolic process	241	27	13.86	1.94805	0.00068	0.0120033
brown	GO:0009314	response to radiation	306	32	17.6	1.81818	0.00075	0.0127281
brown	GO:0007584	response to nutrient	95	14	5.46	2.5641	0.00101	0.0161789
brown	GO:0009108	coenzyme biosynthetic process	96	14	5.52	2.53623	0.00113	0.017515
brown	GO:2000463	positive regulation of excitatory postsy...	10	4	0.58	6.89655	0.00172	0.0244267
brown	GO:0090407	organophosphate biosynthetic process	411	38	23.64	1.60745	0.00252	0.0324984
brown	GO:0051186	cofactor metabolic process	213	23	12.25	1.87755	0.00265	0.0338796
brown	GO:0006805	xenobiotic metabolic process	83	12	4.77	2.51572	0.00268	0.0341291
brown	GO:0006941	striated muscle contraction	83	12	4.77	2.51572	0.00268	0.0341291
brown	GO:0071466	cellular response to xenobiotic stimulus	83	12	4.77	2.51572	0.00268	0.0341291
brown	GO:0015909	long-chain fatty acid transport	34	7	1.96	3.57143	0.00278	0.0349378
brown	GO:0046890	regulation of lipid biosynthetic process	74	11	4.26	2.58216	0.00319	0.0388312
brown	GO:0009410	response to xenobiotic stimulus	85	12	4.89	2.45399	0.00328	0.0393382
brown	GO:0006733	oxidoreduction coenzyme metabolic proces...	54	9	3.11	2.89389	0.00338	0.040241
brown	GO:0006767	water-soluble vitamin metabolic process	75	11	4.31	2.5522	0.00355	0.0419581
brown	GO:0006811	ion transport	738	60	42.45	1.41343	0.00381	0.0443229
brown	GO:0009308	amine metabolic process	157	18	9.03	1.99336	0.00395	0.0455931
brown	GO:0034220	ion transmembrane transport	286	28	16.45	1.70213	0.00408	0.0467291
brown	GO:0043269	regulation of ion transport	208	22	11.97	1.83793	0.00418	0.0476064
brown	GO:0071482	cellular response to light stimulus	57	9	3.28	2.7439	0.00491	0.0543607
brown	GO:0008210	estrogen metabolic process	13	4	0.75	5.33333	0.00511	0.0561169
brown	GO:0070528	protein kinase C signaling cascade	13	4	0.75	5.33333	0.00511	0.0561169
brown	GO:0016042	lipid catabolic process	174	19	10.01	1.8981	0.00532	0.0579926
brown	GO:0071804	cellular potassium ion transport	29	6	1.67	3.59281	0.00539	0.0586379
brown	GO:0071805	potassium ion transmembrane transport	29	6	1.67	3.59281	0.00539	0.0586379
brown	GO:0046470	phosphatidylcholine metabolic process	48	8	2.76	2.89855	0.00561	0.0604654
brown	GO:0032370	positive regulation of lipid transport	21	5	1.21	4.13223	0.00584	0.0621622
brown	GO:0001676	long-chain fatty acid metabolic process	59	9	3.39	2.65487	0.00619	0.065079
brown	GO:0006766	vitamin metabolic process	92	12	5.29	2.26843	0.00628	0.065728
brown	GO:0006869	lipid transport	152	17	8.74	1.94508	0.00642	0.0668066
brown	GO:0010876	lipid localization	178	19	10.24	1.85547	0.00678	0.069618
brown	GO:0006103	2-oxoglutarate metabolic process	14	4	0.81	4.93827	0.00683	0.0699548
brown	GO:0045838	positive regulation of membrane potentia...	14	4	0.81	4.93827	0.00683	0.0699548
brown	GO:2000191	regulation of fatty acid transport	14	4	0.81	4.93827	0.00683	0.0699548
brown	GO:0010165	response to X-ray	22	5	1.27	3.93701	0.00721	0.0728385
brown	GO:0015698	inorganic anion transport	22	5	1.27	3.93701	0.00721	0.0728385
brown	GO:0009582	detection of abiotic stimulus	94	12	5.41	2.21811	0.00745	0.0748449
brown	GO:0046889	positive regulation of lipid biosyntheti...	31	6	1.78	3.37079	0.00758	0.0759166
brown	GO:0071478	cellular response to radiation	96	12	5.52	2.17391	0.00879	0.0847496
brown	GO:0009581	detection of external stimulus	97	12	5.58	2.15054	0.00952	0.0899234
brown	GO:0006936	muscle contraction	198	20	11.39	1.75593	0.01007	0.0939732
brown	GO:0006575	cellular modified amino acid metabolic p...	147	16	8.46	1.89125	0.01035	0.095817
brown	GO:0006084	acetyl-CoA metabolic process	24	5	1.38	3.62319	0.01058	0.0971724
brown	GO:0046503	glycerolipid catabolic process	24	5	1.38	3.62319	0.01058	0.0971724
brown	GO:0019362	pyridine nucleotide metabolic process	43	7	2.47	2.83401	0.01064	0.0975401
brown	GO:0032368	regulation of lipid transport	43	7	2.47	2.83401	0.01064	0.0975401
brown	GO:0046496	nicotinamide nucleotide metabolic proces...	43	7	2.47	2.83401	0.01064	0.0975401
brown	GO:0043603	cellular amide metabolic process	123	14	7.08	1.9774	0.01097	0.0988735
brown	GO:0051188	cofactor biosynthetic process	123	14	7.08	1.9774	0.01097	0.0988735
brown	GO:0044242	cellular lipid catabolic process	111	13	6.39	2.03443	0.01113	0.0999673
brown	GO:0009605	response to external stimulus	930	70	53.5	1.30841	0.01124	0.100567
brown	GO:0015936	coenzyme A metabolic process	16	4	0.92	4.34783	0.01133	0.101039
brown	GO:0086005	regulation of ventricular cardiac muscle...	16	4	0.92	4.34783	0.01133	0.101039
brown	GO:0051262	protein tetramerization	76	10	4.37	2.28833	0.01139	0.101241
brown	GO:0002449	lymphocyte mediated immunity	100	12	5.75	2.08696	0.01201	0.104949
brown	GO:0042493	response to drug	242	23	13.92	1.6523	0.01225	0.106557
brown	GO:0046471	phosphatidylglycerol metabolic process	25	5	1.44	3.47222	0.01261	0.108816
brown	GO:0051004	regulation of lipoprotein lipase activit...	25	5	1.44	3.47222	0.01261	0.108816
brown	GO:0009584	detection of visible light	55	8	3.16	2.53165	0.01274	0.109648
brown	GO:0009628	response to abiotic stimulus	649	51	37.33	1.36619	0.01372	0.115516
brown	GO:0003008	system process	1157	84	66.56	1.26202	0.01379	0.115926
brown	GO:0060048	cardiac muscle contraction	67	9	3.85	2.33766	0.01404	0.117542
brown	GO:0046474	glycerophospholipid biosynthetic process	166	17	9.55	1.7801	0.01485	0.121632
brown	GO:0006749	glutathione metabolic process	36	6	2.07	2.89855	0.01574	0.126129
brown	GO:0006768	biotin metabolic process	10	3	0.58	5.17241	0.01677	0.131979
brown	GO:0018958	phenol-containing compound metabolic pro...	47	7	2.7	2.59259	0.01705	0.133859
brown	GO:0034698	response to gonadotropin stimulus	18	4	1.04	3.84615	0.01739	0.134837
brown	GO:0052646	alditol phosphate metabolic process	18	4	1.04	3.84615	0.01739	0.134837
brown	GO:0006576	cellular biogenic amine metabolic proces...	93	11	5.35	2.05607	0.01746	0.135186
brown	GO:0009411	response to UV	93	11	5.35	2.05607	0.01746	0.135186
brown	GO:0010212	response to ionizing radiation	106	12	6.1	1.96721	0.01846	0.140064
brown	GO:0006650	glycerophospholipid metabolic process	197	19	11.33	1.67696	0.01872	0.14105
brown	GO:0072524	pyridine-containing compound metabolic p...	48	7	2.76	2.53623	0.019	0.142566
brown	GO:0055085	transmembrane transport	571	45	32.85	1.36986	0.01901	0.142575
brown	GO:0008406	gonad development	132	14	7.59	1.84453	0.01947	0.144478
brown	GO:0033865	nucleoside bisphosphate metabolic proces...	28	5	1.61	3.10559	0.02025	0.147928
brown	GO:0033875	ribonucleoside bisphosphate metabolic pr...	28	5	1.61	3.10559	0.02025	0.147928
brown	GO:0034032	purine nucleoside bisphosphate metabolic...	28	5	1.61	3.10559	0.02025	0.147928
brown	GO:0044070	regulation of anion transport	28	5	1.61	3.10559	0.02025	0.147928
brown	GO:0050885	neuromuscular process controlling balanc...	38	6	2.19	2.73973	0.02025	0.147928
brown	GO:0032890	regulation of organic acid transport	19	4	1.09	3.66972	0.02105	0.152329
brown	GO:0006721	terpenoid metabolic process	49	7	2.82	2.48227	0.02111	0.152492
brown	GO:0007613	memory	49	7	2.82	2.48227	0.02111	0.152492
brown	GO:0019216	regulation of lipid metabolic process	160	16	9.2	1.73913	0.02176	0.154311
brown	GO:0006655	phosphatidylglycerol biosynthetic proces...	11	3	0.63	4.7619	0.02209	0.155634
brown	GO:0007340	acrosome reaction	11	3	0.63	4.7619	0.02209	0.155634
brown	GO:0036109	alpha-linolenic acid metabolic process	11	3	0.63	4.7619	0.02209	0.155634
brown	GO:0072350	tricarboxylic acid metabolic process	11	3	0.63	4.7619	0.02209	0.155634
brown	GO:0090208	positive regulation of triglyceride meta...	11	3	0.63	4.7619	0.02209	0.155634
brown	GO:0045471	response to ethanol	61	8	3.51	2.2792	0.02284	0.158584
brown	GO:0050905	neuromuscular process	61	8	3.51	2.2792	0.02284	0.158584
brown	GO:0003012	muscle system process	229	21	13.17	1.59453	0.02319	0.160058
brown	GO:0002381	immunoglobulin production involved in im...	29	5	1.67	2.99401	0.02334	0.160821
brown	GO:0007616	long-term memory	20	4	1.15	3.47826	0.02515	0.169823
brown	GO:0007603	phototransduction, visible light	51	7	2.93	2.38908	0.02579	0.172155
brown	GO:0006820	anion transport	232	21	13.35	1.57303	0.02632	0.17484
brown	GO:0007040	lysosome organization	30	5	1.73	2.89017	0.02673	0.175699
brown	GO:0044106	cellular amine metabolic process	151	15	8.69	1.72612	0.02715	0.177885
brown	GO:0009583	detection of light stimulus	63	8	3.62	2.20994	0.0272	0.178045
brown	GO:0046459	short-chain fatty acid metabolic process	12	3	0.69	4.34783	0.02822	0.182254
brown	GO:0071371	cellular response to gonadotropin stimul...	12	3	0.69	4.34783	0.02822	0.182254
brown	GO:0034754	cellular hormone metabolic process	52	7	2.99	2.34114	0.02838	0.183045
brown	GO:0042439	ethanolamine-containing compound metabol...	64	8	3.68	2.17391	0.02958	0.187686
brown	GO:0009395	phospholipid catabolic process	21	4	1.21	3.30579	0.02969	0.187798
brown	GO:0016056	rhodopsin mediated signaling pathway	21	4	1.21	3.30579	0.02969	0.187798
brown	GO:0019674	NAD metabolic process	21	4	1.21	3.30579	0.02969	0.187798
brown	GO:0050982	detection of mechanical stimulus	21	4	1.21	3.30579	0.02969	0.187798
brown	GO:0006518	peptide metabolic process	76	9	4.37	2.0595	0.02974	0.187886
brown	GO:0045137	development of primary sexual characteri...	153	15	8.8	1.70455	0.03009	0.189059
brown	GO:0071214	cellular response to abiotic stimulus	153	15	8.8	1.70455	0.03009	0.189059
brown	GO:0016064	immunoglobulin mediated immune response	53	7	3.05	2.29508	0.03114	0.193658
brown	GO:0002703	regulation of leukocyte mediated immunit...	65	8	3.74	2.13904	0.0321	0.196328
brown	GO:0051606	detection of stimulus	128	13	7.36	1.7663	0.03252	0.19789
brown	GO:0009991	response to extracellular stimulus	224	20	12.89	1.55159	0.03361	0.202804
brown	GO:0019724	B cell mediated immunity	54	7	3.11	2.2508	0.03408	0.204971
brown	GO:0002312	B cell activation involved in immune res...	32	5	1.84	2.71739	0.03439	0.205983
brown	GO:0008089	anterograde axon cargo transport	22	4	1.27	3.14961	0.03469	0.206031
brown	GO:0035036	sperm-egg recognition	22	4	1.27	3.14961	0.03469	0.206031
brown	GO:0050906	detection of stimulus involved in sensor...	22	4	1.27	3.14961	0.03469	0.206031
brown	GO:0006646	phosphatidylethanolamine biosynthetic pr...	13	3	0.75	4	0.03516	0.207624
brown	GO:0009110	vitamin biosynthetic process	13	3	0.75	4	0.03516	0.207624
brown	GO:0032048	cardiolipin metabolic process	13	3	0.75	4	0.03516	0.207624
brown	GO:0033599	regulation of mammary gland epithelial c...	13	3	0.75	4	0.03516	0.207624
brown	GO:0034767	positive regulation of ion transmembrane...	13	3	0.75	4	0.03516	0.207624
brown	GO:0042537	benzene-containing compound metabolic pr...	13	3	0.75	4	0.03516	0.207624
brown	GO:0045123	cellular extravasation	13	3	0.75	4	0.03516	0.207624
brown	GO:0002443	leukocyte mediated immunity	130	13	7.48	1.73797	0.03624	0.211261
brown	GO:0050877	neurological system process	829	60	47.69	1.25813	0.03666	0.212613
brown	GO:0001889	liver development	79	9	4.54	1.98238	0.03697	0.212691
brown	GO:0002460	adaptive immune response based on somati...	105	11	6.04	1.82119	0.03866	0.219078
brown	GO:0007600	sensory perception	256	22	14.73	1.49355	0.0387	0.219228
brown	GO:0006081	cellular aldehyde metabolic process	23	4	1.32	3.0303	0.04015	0.223322
brown	GO:0006654	phosphatidic acid biosynthetic process	23	4	1.32	3.0303	0.04015	0.223322
brown	GO:0046473	phosphatidic acid metabolic process	23	4	1.32	3.0303	0.04015	0.223322
brown	GO:0086002	regulation of cardiac muscle cell action...	23	4	1.32	3.0303	0.04015	0.223322
brown	GO:0061008	hepaticobiliary system development	81	9	4.66	1.93133	0.04241	0.231541
brown	GO:0001836	release of cytochrome c from mitochondri...	45	6	2.59	2.3166	0.04271	0.232586
brown	GO:0002027	regulation of heart rate	45	6	2.59	2.3166	0.04271	0.232586
brown	GO:0019637	organophosphate metabolic process	963	68	55.4	1.22744	0.04273	0.232586
brown	GO:0019433	triglyceride catabolic process	14	3	0.81	3.7037	0.04288	0.233012
brown	GO:0036152	phosphatidylethanolamine acyl-chain remo...	14	3	0.81	3.7037	0.04288	0.233012
brown	GO:0046337	phosphatidylethanolamine metabolic proce...	14	3	0.81	3.7037	0.04288	0.233012
brown	GO:0051412	response to corticosterone stimulus	14	3	0.81	3.7037	0.04288	0.233012
brown	GO:0061099	negative regulation of protein tyrosine ...	14	3	0.81	3.7037	0.04288	0.233012
brown	GO:0031667	response to nutrient levels	202	18	11.62	1.54905	0.04296	0.233369
brown	GO:0006793	phosphorus metabolic process	2068	136	118.96	1.14324	0.04334	0.234777
brown	GO:0034765	regulation of ion transmembrane transpor...	107	11	6.16	1.78571	0.04344	0.234777
brown	GO:0045834	positive regulation of lipid metabolic p...	69	8	3.97	2.01511	0.04364	0.235569
brown	GO:0010923	negative regulation of phosphatase activ...	57	7	3.28	2.13415	0.04396	0.236669
brown	GO:1901214	regulation of neuron death	121	12	6.96	1.72414	0.04545	0.242524
brown	GO:0006739	NADP metabolic process	24	4	1.38	2.89855	0.04606	0.245377
red	GO:0022904	respiratory electron transport chain	95	29	3.26	8.89571	3.2e-20	1.44667e-17
red	GO:0022900	electron transport chain	96	29	3.29	8.81459	4.4e-20	1.88447e-17
red	GO:0045333	cellular respiration	143	32	4.9	6.53061	9.7e-18	2.58799e-15
red	GO:0042773	ATP synthesis coupled electron transport	48	19	1.65	11.5152	4.4e-16	8.62771e-14
red	GO:0042775	mitochondrial ATP synthesis coupled elec...	48	19	1.65	11.5152	4.4e-16	8.62771e-14
red	GO:0006120	mitochondrial electron transport, NADH t...	37	17	1.27	13.3858	7.5e-16	1.34135e-13
red	GO:0006119	oxidative phosphorylation	61	19	2.09	9.09091	7.5e-14	9.765e-12
red	GO:0019083	viral transcription	144	26	4.94	5.26316	2.6e-12	2.53383e-10
red	GO:0006614	SRP-dependent cotranslational protein ta...	103	22	3.53	6.23229	3.9e-12	3.627e-10
red	GO:0006613	cotranslational protein targeting to mem...	105	22	3.6	6.11111	5.9e-12	5.27596e-10
red	GO:0045047	protein targeting to ER	106	22	3.64	6.04396	7.2e-12	6.36848e-10
red	GO:0072599	establishment of protein localization to...	107	22	3.67	5.99455	8.8e-12	7.74162e-10
red	GO:0070972	protein localization to endoplasmic reti...	118	23	4.05	5.67901	9.4e-12	8.09444e-10
red	GO:0019080	viral genome expression	154	26	5.28	4.92424	1.3e-11	1.05261e-09
red	GO:0006415	translational termination	89	20	3.05	6.55738	1.4e-11	1.11146e-09
red	GO:0006414	translational elongation	103	21	3.53	5.94901	3.1e-11	2.2933e-09
red	GO:0019058	viral infectious cycle	226	31	7.75	4	3.5e-11	2.55437e-09
red	GO:0000956	nuclear-transcribed mRNA catabolic proce...	176	27	6.04	4.4702	5.1e-11	3.64046e-09
red	GO:0015980	energy derivation by oxidation of organi...	274	34	9.4	3.61702	6.4e-11	4.48966e-09
red	GO:0006413	translational initiation	148	24	5.08	4.72441	1.9e-10	1.2369e-08
red	GO:0006402	mRNA catabolic process	188	27	6.45	4.18605	2.4e-10	1.54387e-08
red	GO:0006612	protein targeting to membrane	151	24	5.18	4.6332	2.9e-10	1.85088e-08
red	GO:0006091	generation of precursor metabolites and ...	338	37	11.59	3.19241	3.4e-10	2.12011e-08
red	GO:0006401	RNA catabolic process	213	28	7.31	3.83037	8.8e-10	5.06078e-08
red	GO:0000184	nuclear-transcribed mRNA catabolic proce...	116	20	3.98	5.02513	2.1e-09	1.17448e-07
red	GO:0043624	cellular protein complex disassembly	153	22	5.25	4.19048	1.1e-08	5.40861e-07
red	GO:0043241	protein complex disassembly	157	22	5.39	4.08163	1.8e-08	8.4181e-07
red	GO:0055114	oxidation-reduction process	426	39	14.61	2.6694	1.9e-08	8.75992e-07
red	GO:0006412	translation	455	40	15.61	2.56246	3.9e-08	1.7248e-06
red	GO:0032984	macromolecular complex disassembly	178	23	6.11	3.76432	4.1e-08	1.80833e-06
red	GO:0090150	establishment of protein localization to...	209	25	7.17	3.48675	4.9e-08	2.14375e-06
red	GO:0044403	symbiosis, encompassing mutualism throug...	635	49	21.78	2.24977	6.8e-08	2.92005e-06
red	GO:0044419	interspecies interaction between organis...	635	49	21.78	2.24977	6.8e-08	2.92005e-06
red	GO:0016032	viral process	606	47	20.79	2.2607	1.1e-07	4.57864e-06
red	GO:0044764	multi-organism cellular process	608	47	20.85	2.2542	1.2e-07	4.98214e-06
red	GO:0016071	mRNA metabolic process	594	46	20.37	2.25822	1.6e-07	6.54271e-06
red	GO:0072657	protein localization to membrane	257	26	8.81	2.95119	7.6e-07	2.83693e-05
red	GO:0016044	cellular membrane organization	630	45	21.61	2.08237	2.1e-06	7.42989e-05
red	GO:0061024	membrane organization	631	45	21.64	2.07948	2.2e-06	7.76681e-05
red	GO:0034655	nucleobase-containing compound catabolic...	699	47	23.98	1.95997	6.4e-06	0.000213006
red	GO:0034613	cellular protein localization	917	57	31.45	1.8124	6.9e-06	0.000228247
red	GO:0044270	cellular nitrogen compound catabolic pro...	724	48	24.83	1.93315	7.4e-06	0.000242324
red	GO:0046700	heterocycle catabolic process	724	48	24.83	1.93315	7.4e-06	0.000242324
red	GO:0019439	aromatic compound catabolic process	725	48	24.87	1.93004	7.7e-06	0.000248646
red	GO:0070727	cellular macromolecule localization	922	57	31.62	1.80266	8.1e-06	0.000259503
red	GO:0033365	protein localization to organelle	492	36	16.88	2.1327	1.4e-05	0.000424302
red	GO:1901361	organic cyclic compound catabolic proces...	745	48	25.55	1.87867	1.6e-05	0.000478676
red	GO:0072594	establishment of protein localization to...	401	31	13.75	2.25455	2e-05	0.000588608
red	GO:0006886	intracellular protein transport	655	42	22.47	1.86916	6.3e-05	0.0016672
red	GO:0006605	protein targeting	440	31	15.09	2.05434	0.00011	0.00263272
red	GO:0046907	intracellular transport	1171	63	40.16	1.56873	0.00018	0.00408008
red	GO:0044265	cellular macromolecule catabolic process	690	42	23.67	1.7744	0.0002	0.00447115
red	GO:0071822	protein complex subunit organization	986	54	33.82	1.59669	0.00036	0.00727826
red	GO:0051704	multi-organism process	1010	55	34.64	1.58776	0.00036	0.00727826
red	GO:0022411	cellular component disassembly	347	25	11.9	2.10084	0.00037	0.00742509
red	GO:0043928	exonucleolytic nuclear-transcribed mRNA ...	29	6	0.99	6.06061	0.00038	0.00755128
red	GO:0044267	cellular protein metabolic process	2902	129	99.54	1.29596	0.0004	0.00781513
red	GO:0000291	nuclear-transcribed mRNA catabolic proce...	30	6	1.03	5.82524	0.00046	0.00881802
red	GO:0000413	protein peptidyl-prolyl isomerization	20	5	0.69	7.24638	0.00047	0.00897799
red	GO:0043933	macromolecular complex subunit organizat...	1214	63	41.64	1.51297	0.00048	0.00914754
red	GO:0033108	mitochondrial respiratory chain complex ...	22	5	0.75	6.66667	0.00075	0.0127281
red	GO:0006825	copper ion transport	13	4	0.45	8.88889	0.00076	0.0128576
red	GO:0009057	macromolecule catabolic process	841	46	28.85	1.59445	0.00104	0.016465
red	GO:0044237	cellular metabolic process	7133	273	244.66	1.11583	0.00105	0.0165589
red	GO:0044248	cellular catabolic process	1511	73	51.83	1.40845	0.00129	0.01935
red	GO:0032008	positive regulation of TOR signaling cas...	15	4	0.51	7.84314	0.00138	0.020511
red	GO:0006796	phosphate-containing compound metabolic ...	2031	93	69.66	1.33506	0.00143	0.0210427
red	GO:0016310	phosphorylation	1073	55	36.8	1.49457	0.00152	0.0220875
red	GO:0010257	NADH dehydrogenase complex assembly	16	4	0.55	7.27273	0.00179	0.0250492
red	GO:0032981	mitochondrial respiratory chain complex ...	16	4	0.55	7.27273	0.00179	0.0250492
red	GO:0097031	mitochondrial respiratory chain complex ...	16	4	0.55	7.27273	0.00179	0.0250492
red	GO:0008104	protein localization	1462	70	50.15	1.39581	0.00208	0.0282807
red	GO:0015985	energy coupled proton transport, down el...	17	4	0.58	6.89655	0.00227	0.0299386
red	GO:0015986	ATP synthesis coupled proton transport	17	4	0.58	6.89655	0.00227	0.0299386
red	GO:0006793	phosphorus metabolic process	2068	93	70.93	1.31115	0.00251	0.0324466
red	GO:0048524	positive regulation of viral process	70	8	2.4	3.33333	0.00262	0.0335752
red	GO:0050792	regulation of viral process	103	10	3.53	2.83286	0.00277	0.034866
red	GO:0018208	peptidyl-proline modification	29	5	0.99	5.05051	0.00278	0.0349378
red	GO:0044281	small molecule metabolic process	2053	92	70.42	1.30645	0.00297	0.036786
red	GO:0043902	positive regulation of multi-organism pr...	72	8	2.47	3.23887	0.00313	0.0383013
red	GO:0019538	protein metabolic process	3314	138	113.67	1.21404	0.00373	0.0436105
red	GO:0016482	cytoplasmic transport	686	37	23.53	1.57246	0.00407	0.0466474
red	GO:0030071	regulation of mitotic metaphase/anaphase...	45	6	1.54	3.8961	0.00411	0.0469076
red	GO:1902099	regulation of metaphase/anaphase transit...	45	6	1.54	3.8961	0.00411	0.0469076
red	GO:0043903	regulation of symbiosis, encompassing mu...	109	10	3.74	2.6738	0.00417	0.0475257
red	GO:0042274	ribosomal small subunit biogenesis	20	4	0.69	5.7971	0.00427	0.0484956
red	GO:0045184	establishment of protein localization	1178	57	40.4	1.41089	0.00449	0.0505708
red	GO:0007091	metaphase/anaphase transition of mitotic...	46	6	1.58	3.79747	0.0046	0.0514536
red	GO:0044784	metaphase/anaphase transition of cell cy...	46	6	1.58	3.79747	0.0046	0.0514536
red	GO:0000377	RNA splicing, via transesterification re...	207	15	7.1	2.11268	0.00512	0.0561509
red	GO:0000398	mRNA splicing, via spliceosome	207	15	7.1	2.11268	0.00512	0.0561509
red	GO:1901575	organic substance catabolic process	1602	73	54.95	1.32848	0.00583	0.062137
red	GO:0009056	catabolic process	1787	80	61.29	1.30527	0.00605	0.064104
red	GO:0006396	RNA processing	633	34	21.71	1.5661	0.00619	0.065079
red	GO:0000375	RNA splicing, via transesterification re...	212	15	7.27	2.06327	0.00636	0.0663519
red	GO:0008152	metabolic process	7671	285	263.11	1.0832	0.00717	0.0726147
red	GO:0007094	mitotic spindle assembly checkpoint	36	5	1.23	4.06504	0.00726	0.0732526
red	GO:0006397	mRNA processing	390	23	13.38	1.71898	0.00807	0.0793111
red	GO:0045841	negative regulation of mitotic metaphase...	37	5	1.27	3.93701	0.00817	0.079956
red	GO:0071173	spindle assembly checkpoint	37	5	1.27	3.93701	0.00817	0.079956
red	GO:1902100	negative regulation of metaphase/anaphas...	37	5	1.27	3.93701	0.00817	0.079956
red	GO:0043900	regulation of multi-organism process	178	13	6.11	2.12766	0.00831	0.0811309
red	GO:0072665	protein localization to vacuole	13	3	0.45	6.66667	0.00886	0.0853234
red	GO:0022618	ribonucleoprotein complex assembly	122	10	4.18	2.39234	0.00914	0.0873992
red	GO:0051983	regulation of chromosome segregation	25	4	0.86	4.65116	0.00974	0.0916292
red	GO:0050434	positive regulation of viral transcripti...	54	6	1.85	3.24324	0.01008	0.0940126
red	GO:0071174	mitotic spindle checkpoint	39	5	1.34	3.73134	0.0102	0.0947517
red	GO:0051641	cellular localization	1825	80	62.6	1.27796	0.01023	0.0949762
red	GO:0032314	regulation of Rac GTPase activity	14	3	0.48	6.25	0.01099	0.0988735
red	GO:0032486	Rap protein signal transduction	14	3	0.48	6.25	0.01099	0.0988735
red	GO:0042273	ribosomal large subunit biogenesis	14	3	0.48	6.25	0.01099	0.0988735
red	GO:0042776	mitochondrial ATP synthesis coupled prot...	14	3	0.48	6.25	0.01099	0.0988735
red	GO:0006979	response to oxidative stress	206	14	7.07	1.9802	0.01151	0.10214
red	GO:0044710	single-organism metabolic process	2453	103	84.14	1.22415	0.01173	0.103472
red	GO:0042455	ribonucleoside biosynthetic process	90	8	3.09	2.589	0.01194	0.104587
red	GO:0071826	ribonucleoprotein complex subunit organi...	128	10	4.39	2.2779	0.01257	0.108644
red	GO:0007088	regulation of mitosis	91	8	3.12	2.5641	0.01271	0.109447
red	GO:0051783	regulation of nuclear division	91	8	3.12	2.5641	0.01271	0.109447
red	GO:0022613	ribonucleoprotein complex biogenesis	251	16	8.61	1.8583	0.0128	0.109931
red	GO:0033036	macromolecule localization	1684	74	57.76	1.28116	0.0129	0.110499
red	GO:0051656	establishment of organelle localization	168	12	5.76	2.08333	0.01295	0.110869
red	GO:0009142	nucleoside triphosphate biosynthetic pro...	57	6	1.96	3.06122	0.01301	0.11109
red	GO:0008380	RNA splicing	317	19	10.87	1.74793	0.01305	0.111373
red	GO:0009206	purine ribonucleoside triphosphate biosy...	42	5	1.44	3.47222	0.01387	0.116478
red	GO:0034622	cellular macromolecular complex assembly	503	27	17.25	1.56522	0.0141	0.117862
red	GO:0046328	regulation of JNK cascade	112	9	3.84	2.34375	0.01473	0.120832
red	GO:0015031	protein transport	1124	52	38.55	1.3489	0.01522	0.123853
red	GO:0000288	nuclear-transcribed mRNA catabolic proce...	59	6	2.02	2.9703	0.01526	0.123992
red	GO:0009145	purine nucleoside triphosphate biosynthe...	43	5	1.47	3.40136	0.01526	0.123992
red	GO:0072593	reactive oxygen species metabolic proces...	95	8	3.26	2.45399	0.01617	0.128751
red	GO:0042451	purine nucleoside biosynthetic process	77	7	2.64	2.65152	0.01622	0.128897
red	GO:0046129	purine ribonucleoside biosynthetic proce...	77	7	2.64	2.65152	0.01622	0.128897
red	GO:0045839	negative regulation of mitosis	44	5	1.51	3.31126	0.01675	0.131885
red	GO:0051784	negative regulation of nuclear division	44	5	1.51	3.31126	0.01675	0.131885
red	GO:0006368	transcription elongation from RNA polyme...	78	7	2.68	2.61194	0.01732	0.134743
red	GO:0006457	protein folding	176	12	6.04	1.98675	0.01811	0.138311
red	GO:0031577	spindle checkpoint	45	5	1.54	3.24675	0.01833	0.139478
red	GO:0006370	7-methylguanosine mRNA capping	30	4	1.03	3.8835	0.01845	0.140053
red	GO:0007257	activation of JUN kinase activity	30	4	1.03	3.8835	0.01845	0.140053
red	GO:0097035	regulation of membrane lipid distributio...	17	3	0.58	5.17241	0.01904	0.142593
red	GO:0046782	regulation of viral transcription	62	6	2.13	2.8169	0.01912	0.142677
red	GO:0009163	nucleoside biosynthetic process	98	8	3.36	2.38095	0.01918	0.142797
red	GO:0042440	pigment metabolic process	46	5	1.58	3.16456	0.02	0.146886
red	GO:1901659	glycosyl compound biosynthetic process	99	8	3.4	2.35294	0.02026	0.147928
red	GO:0051301	cell division	449	24	15.4	1.55844	0.0209	0.151513
red	GO:0002066	columnar/cuboidal epithelial cell develo...	18	3	0.62	4.83871	0.02228	0.156701
red	GO:0006801	superoxide metabolic process	32	4	1.1	3.63636	0.02295	0.158873
red	GO:0009201	ribonucleoside triphosphate biosynthetic...	48	5	1.65	3.0303	0.02365	0.162475
red	GO:0051640	organelle localization	226	14	7.75	1.80645	0.02384	0.163436
red	GO:0007017	microtubule-based process	409	22	14.03	1.56807	0.02473	0.168261
red	GO:0009452	7-methylguanosine RNA capping	33	4	1.13	3.53982	0.02543	0.170669
red	GO:0036260	RNA capping	33	4	1.13	3.53982	0.02543	0.170669
red	GO:0033013	tetrapyrrole metabolic process	49	5	1.68	2.97619	0.02562	0.17152
red	GO:0042255	ribosome assembly	19	3	0.65	4.61538	0.0258	0.172155
red	GO:0051649	establishment of localization in cell	1608	69	55.15	1.25113	0.02648	0.175507
red	GO:0034453	microtubule anchoring	34	4	1.17	3.4188	0.02806	0.181437
red	GO:0007254	JNK cascade	146	10	5.01	1.99601	0.02869	0.184193
red	GO:0000041	transition metal ion transport	68	6	2.33	2.57511	0.02874	0.184296
red	GO:0009156	ribonucleoside monophosphate biosyntheti...	68	6	2.33	2.57511	0.02874	0.184296
red	GO:0006364	rRNA processing	107	8	3.67	2.17984	0.03057	0.191125
red	GO:0006754	ATP biosynthetic process	35	4	1.2	3.33333	0.03086	0.192432
red	GO:0006778	porphyrin-containing compound metabolic ...	35	4	1.2	3.33333	0.03086	0.192432
red	GO:0071230	cellular response to amino acid stimulus	35	4	1.2	3.33333	0.03086	0.192432
red	GO:0015992	proton transport	52	5	1.78	2.80899	0.03215	0.196559
red	GO:0009124	nucleoside monophosphate biosynthetic pr...	70	6	2.4	2.5	0.03255	0.19789
red	GO:0051650	establishment of vesicle localization	109	8	3.74	2.13904	0.03362	0.202804
red	GO:0032651	regulation of interleukin-1 beta product...	21	3	0.72	4.16667	0.03367	0.20294
red	GO:0032872	regulation of stress-activated MAPK casc...	130	9	4.46	2.01794	0.03475	0.206031
red	GO:0070302	regulation of stress-activated protein k...	131	9	4.49	2.00445	0.03623	0.211261
red	GO:0032006	regulation of TOR signaling cascade	37	4	1.27	3.14961	0.03691	0.212691
red	GO:0006818	hydrogen transport	54	5	1.85	2.7027	0.03704	0.212691
red	GO:0019079	viral genome replication	54	5	1.85	2.7027	0.03704	0.212691
red	GO:0032652	regulation of interleukin-1 production	22	3	0.75	4	0.03802	0.216053
red	GO:0043388	positive regulation of DNA binding	22	3	0.75	4	0.03802	0.216053
red	GO:0048488	synaptic vesicle endocytosis	22	3	0.75	4	0.03802	0.216053
red	GO:0046148	pigment biosynthetic process	38	4	1.3	3.07692	0.04018	0.223337
red	GO:0046330	positive regulation of JNK cascade	38	4	1.3	3.07692	0.04018	0.223337
red	GO:0016072	rRNA metabolic process	113	8	3.88	2.06186	0.04032	0.223885
red	GO:0009161	ribonucleoside monophosphate metabolic p...	134	9	4.6	1.95652	0.04095	0.226687
red	GO:0032611	interleukin-1 beta production	23	3	0.79	3.79747	0.04265	0.232539
red	GO:0071229	cellular response to acid	39	4	1.34	2.98507	0.04361	0.235485
red	GO:0010803	regulation of tumor necrosis factor-medi...	10	2	0.34	5.88235	0.04401	0.236703
red	GO:0018065	protein-cofactor linkage	10	2	0.34	5.88235	0.04401	0.236703
red	GO:0035774	positive regulation of insulin secretion...	10	2	0.34	5.88235	0.04401	0.236703
red	GO:0009127	purine nucleoside monophosphate biosynth...	57	5	1.96	2.55102	0.04518	0.241295
red	GO:0009168	purine ribonucleoside monophosphate bios...	57	5	1.96	2.55102	0.04518	0.241295
red	GO:0042743	hydrogen peroxide metabolic process	24	3	0.82	3.65854	0.04754	0.249799
red	GO:0001101	response to acid	77	6	2.64	2.27273	0.04837	0.253289
red	GO:0009123	nucleoside monophosphate metabolic proce...	139	9	4.77	1.88679	0.0497	0.258507
red	GO:0003323	type B pancreatic cell development	11	2	0.38	5.26316	0.05259	0.268869
red	GO:0030490	maturation of SSU-rRNA	11	2	0.38	5.26316	0.05259	0.268869
red	GO:0042219	cellular modified amino acid catabolic p...	11	2	0.38	5.26316	0.05259	0.268869
red	GO:0046716	muscle cell cellular homeostasis	11	2	0.38	5.26316	0.05259	0.268869
red	GO:0032612	interleukin-1 production	25	3	0.86	3.48837	0.0527	0.268869
red	GO:0032856	activation of Ras GTPase activity	25	3	0.86	3.48837	0.0527	0.268869
red	GO:0046034	ATP metabolic process	99	7	3.4	2.05882	0.05349	0.272729
red	GO:0008654	phospholipid biosynthetic process	187	11	6.41	1.71607	0.05726	0.286212
red	GO:0006779	porphyrin-containing compound biosynthet...	26	3	0.89	3.37079	0.05811	0.289217
red	GO:0035020	regulation of Rac protein signal transdu...	26	3	0.89	3.37079	0.05811	0.289217
red	GO:0045069	regulation of viral genome replication	43	4	1.47	2.72109	0.0589	0.291899
green	GO:0009653	anatomical structure morphogenesis	1612	153	57.03	2.6828	< 1e-30	NA
green	GO:0048513	organ development	1783	161	63.08	2.55231	< 1e-30	NA
green	GO:0048731	system development	2617	198	92.59	2.13846	< 1e-30	NA
green	GO:0044707	single-multicellular organism process	3962	252	140.18	1.79769	< 1e-30	NA
green	GO:0032501	multicellular organismal process	4078	255	144.28	1.7674	< 1e-30	NA
green	GO:0007275	multicellular organismal development	3024	212	106.99	1.98149	4.4e-30	3.5805e-26
green	GO:0072358	cardiovascular system development	627	86	22.18	3.87737	6e-29	1.953e-25
green	GO:0072359	circulatory system development	627	86	22.18	3.87737	6e-29	1.953e-25
green	GO:0009887	organ morphogenesis	532	78	18.82	4.14453	3.9e-28	9.0675e-25
green	GO:0048856	anatomical structure development	3053	209	108.01	1.93501	6.1e-28	1.24097e-24
green	GO:0044767	single-organism developmental process	2723	194	96.34	2.0137	1.8e-27	2.9295e-24
green	GO:0048646	anatomical structure formation involved ...	679	86	24.02	3.58035	2e-26	2.50385e-23
green	GO:0048729	tissue morphogenesis	371	62	13.13	4.72201	1.9e-25	2.0615e-22
green	GO:0032502	developmental process	3426	219	121.21	1.80678	2.1e-25	2.13609e-22
green	GO:0009888	tissue development	1037	105	36.69	2.86182	2.2e-24	2.10618e-21
green	GO:0001944	vasculature development	414	64	14.65	4.3686	2.5e-24	2.26042e-21
green	GO:0001568	blood vessel development	395	62	13.98	4.43491	6.2e-24	5.28937e-21
green	GO:0030198	extracellular matrix organization	245	47	8.67	5.42099	5.3e-22	3.89185e-19
green	GO:0022610	biological adhesion	722	82	25.54	3.21065	5.5e-22	3.89185e-19
green	GO:0043062	extracellular structure organization	246	47	8.7	5.4023	6.3e-22	4.27219e-19
green	GO:0007155	cell adhesion	720	81	25.47	3.18021	1.9e-21	1.18933e-18
green	GO:0007166	cell surface receptor signaling pathway	1793	138	63.44	2.17528	6.3e-21	3.5356e-18
green	GO:0051239	regulation of multicellular organismal p...	1412	119	49.96	2.38191	6.6e-21	3.5805e-18
green	GO:0040011	locomotion	962	94	34.04	2.76146	1.4e-20	7.12031e-18
green	GO:2000026	regulation of multicellular organismal d...	867	88	30.67	2.86925	2.7e-20	1.2555e-17
green	GO:0048514	blood vessel morphogenesis	347	53	12.28	4.31596	5.9e-20	2.46212e-17
green	GO:0050793	regulation of developmental process	1143	102	40.44	2.52226	1.8e-19	6.81279e-17
green	GO:0009790	embryo development	726	78	25.69	3.0362	2.1e-19	7.76761e-17
green	GO:0006928	cellular component movement	1128	101	39.91	2.53069	2.3e-19	8.31833e-17
green	GO:0042221	response to chemical stimulus	2170	152	76.77	1.97994	2.7e-19	9.55272e-17
green	GO:0002009	morphogenesis of an epithelium	300	48	10.61	4.52403	5.5e-19	1.90452e-16
green	GO:0016477	cell migration	659	73	23.32	3.13036	6.5e-19	2.20391e-16
green	GO:0048598	embryonic morphogenesis	367	53	12.98	4.0832	7.8e-19	2.59071e-16
green	GO:0008283	cell proliferation	1174	102	41.54	2.45546	1.3e-18	4.2315e-16
green	GO:0001525	angiogenesis	286	46	10.12	4.54545	2.5e-18	7.53472e-16
green	GO:0042127	regulation of cell proliferation	881	85	31.17	2.72698	3.5e-18	1.03568e-15
green	GO:0035295	tube development	341	50	12.06	4.14594	4.3e-18	1.24969e-15
green	GO:0030154	cell differentiation	2051	143	72.56	1.97078	9.7e-18	2.58799e-15
green	GO:0048870	cell motility	710	74	25.12	2.94586	1.2e-17	3.1e-15
green	GO:0051674	localization of cell	710	74	25.12	2.94586	1.2e-17	3.1e-15
green	GO:0001501	skeletal system development	274	44	9.69	4.54076	1.6e-17	4.00615e-15
green	GO:0060429	epithelium development	570	65	20.17	3.22261	1.7e-17	4.19205e-15
green	GO:0007389	pattern specification process	290	45	10.26	4.38596	2.5e-17	6.07276e-15
green	GO:0048583	regulation of response to stimulus	1979	138	70.02	1.97087	5.1e-17	1.20293e-14
green	GO:0048869	cellular developmental process	2210	148	78.19	1.89283	7.7e-17	1.79025e-14
green	GO:0048568	embryonic organ development	263	42	9.3	4.51613	1.1e-16	2.48646e-14
green	GO:0007423	sensory organ development	302	45	10.68	4.21348	1.3e-16	2.89829e-14
green	GO:0023052	signaling	3672	207	129.92	1.59329	2.7e-16	5.63365e-14
green	GO:0044700	single organism signaling	3672	207	129.92	1.59329	2.7e-16	5.63365e-14
green	GO:0050896	response to stimulus	4976	255	176.05	1.44845	2.8e-16	5.76835e-14
green	GO:0007178	transmembrane receptor protein serine/th...	223	38	7.89	4.81622	3.8e-16	7.63519e-14
green	GO:0009966	regulation of signal transduction	1559	116	55.16	2.10297	4.6e-16	8.9125e-14
green	GO:0007165	signal transduction	3285	191	116.22	1.64343	5.4e-16	9.98693e-14
green	GO:0009952	anterior/posterior pattern specification	129	29	4.56	6.35965	7e-16	1.28006e-13
green	GO:0045165	cell fate commitment	139	30	4.92	6.09756	7.2e-16	1.302e-13
green	GO:0051094	positive regulation of developmental pro...	520	59	18.4	3.20652	8.2e-16	1.4506e-13
green	GO:0007154	cell communication	3761	209	133.06	1.57072	9.2e-16	1.61e-13
green	GO:0035239	tube morphogenesis	243	39	8.6	4.53488	1.2e-15	2.03438e-13
green	GO:0003002	regionalization	203	35	7.18	4.87465	4e-15	6.44554e-13
green	GO:0045595	regulation of cell differentiation	815	75	28.83	2.60146	6.7e-15	1.04849e-12
green	GO:0007167	enzyme linked receptor protein signaling...	752	71	26.61	2.66817	1.1e-14	1.65764e-12
green	GO:0051093	negative regulation of developmental pro...	415	50	14.68	3.40599	1.6e-14	2.38899e-12
green	GO:0007507	heart development	330	44	11.68	3.76712	1.8e-14	2.63919e-12
green	GO:0023051	regulation of signaling	1745	121	61.74	1.95983	1.8e-14	2.63919e-12
green	GO:0010646	regulation of cell communication	1748	121	61.84	1.95666	2e-14	2.88053e-12
green	GO:0001655	urogenital system development	214	35	7.57	4.62351	2.1e-14	2.97196e-12
green	GO:0023019	signal transduction involved in regulati...	14	11	0.5	22	3.1e-14	4.34935e-12
green	GO:0045597	positive regulation of cell differentiat...	381	47	13.48	3.48665	4.2e-14	5.74412e-12
green	GO:0022603	regulation of anatomical structure morph...	488	54	17.27	3.12681	4.5e-14	6.05269e-12
green	GO:0060562	epithelial tube morphogenesis	232	36	8.21	4.3849	4.7e-14	6.26988e-12
green	GO:0072001	renal system development	187	32	6.62	4.83384	8e-14	1.03333e-11
green	GO:0048468	cell development	1226	94	43.38	2.1669	1.2e-13	1.45746e-11
green	GO:0007399	nervous system development	1410	103	49.89	2.06454	1.3e-13	1.5557e-11
green	GO:0030155	regulation of cell adhesion	228	35	8.07	4.33705	1.5e-13	1.76902e-11
green	GO:0048518	positive regulation of biological proces...	2813	165	99.52	1.65796	1.5e-13	1.76902e-11
green	GO:0010033	response to organic substance	1588	111	56.18	1.97579	2.1e-13	2.37344e-11
green	GO:0048863	stem cell differentiation	220	34	7.78	4.37018	2.8e-13	3.14276e-11
green	GO:0030334	regulation of cell migration	328	42	11.6	3.62069	3e-13	3.32143e-11
green	GO:0009719	response to endogenous stimulus	877	75	31.03	2.41702	3.1e-13	3.40895e-11
green	GO:0061061	muscle structure development	395	46	13.98	3.29041	6.7e-13	7.12696e-11
green	GO:0009605	response to external stimulus	930	77	32.9	2.34043	7.6e-13	7.98e-11
green	GO:0048585	negative regulation of response to stimu...	694	64	24.55	2.60692	8.4e-13	8.76346e-11
green	GO:0007369	gastrulation	113	24	4	6	8.9e-13	9.22596e-11
green	GO:0090092	regulation of transmembrane receptor pro...	134	26	4.74	5.48523	9.2e-13	9.47658e-11
green	GO:0007420	brain development	400	46	14.15	3.25088	1.1e-12	1.11196e-10
green	GO:0048562	embryonic organ morphogenesis	169	29	5.98	4.8495	1.1e-12	1.11196e-10
green	GO:0048522	positive regulation of cellular process	2528	150	89.44	1.6771	1.8e-12	1.80833e-10
green	GO:0000904	cell morphogenesis involved in different...	585	57	20.7	2.75362	1.9e-12	1.89709e-10
green	GO:0006935	chemotaxis	439	48	15.53	3.09079	2.1e-12	2.07136e-10
green	GO:0042330	taxis	439	48	15.53	3.09079	2.1e-12	2.07136e-10
green	GO:0001763	morphogenesis of a branching structure	140	26	4.95	5.25253	2.6e-12	2.53383e-10
green	GO:2000145	regulation of cell motility	350	42	12.38	3.39257	2.7e-12	2.61562e-10
green	GO:0051270	regulation of cellular component movemen...	397	45	14.05	3.20285	3.1e-12	2.98536e-10
green	GO:0009611	response to wounding	751	66	26.57	2.484	3.2e-12	3.06353e-10
green	GO:0060485	mesenchyme development	120	24	4.25	5.64706	3.5e-12	3.31177e-10
green	GO:0044699	single-organism process	8160	344	288.7	1.19155	3.7e-12	3.46078e-10
green	GO:0030900	forebrain development	215	32	7.61	4.20499	4.1e-12	3.79134e-10
green	GO:0040012	regulation of locomotion	371	43	13.13	3.27494	4.7e-12	4.32161e-10
green	GO:0044259	multicellular organismal macromolecule m...	82	20	2.9	6.89655	4.8e-12	4.36425e-10
green	GO:0061138	morphogenesis of a branching epithelium	134	25	4.74	5.27426	6.3e-12	5.60287e-10
green	GO:0032989	cellular component morphogenesis	862	71	30.5	2.32787	9.2e-12	8.00695e-10
green	GO:0070848	response to growth factor stimulus	523	52	18.5	2.81081	9.3e-12	8.05093e-10
green	GO:0048754	branching morphogenesis of an epithelial...	115	23	4.07	5.65111	1e-11	8.52094e-10
green	GO:0043009	chordate embryonic development	443	47	15.67	2.99936	1.1e-11	9.18077e-10
green	GO:0044243	multicellular organismal catabolic proce...	59	17	2.09	8.13397	1.1e-11	9.18077e-10
green	GO:0003006	developmental process involved in reprod...	306	38	10.83	3.50877	1.1e-11	9.18077e-10
green	GO:0048732	gland development	198	30	7.01	4.2796	1.2e-11	9.86364e-10
green	GO:0051716	cellular response to stimulus	4034	207	142.72	1.45039	1.2e-11	9.86364e-10
green	GO:0048762	mesenchymal cell differentiation	106	22	3.75	5.86667	1.3e-11	1.05261e-09
green	GO:0042476	odontogenesis	77	19	2.72	6.98529	1.3e-11	1.05261e-09
green	GO:0003007	heart morphogenesis	150	26	5.31	4.89642	1.4e-11	1.11146e-09
green	GO:0023056	positive regulation of signaling	687	61	24.31	2.50926	1.6e-11	1.24593e-09
green	GO:0044236	multicellular organismal metabolic proce...	87	20	3.08	6.49351	1.6e-11	1.24593e-09
green	GO:0009792	embryo development ending in birth or eg...	448	47	15.85	2.9653	1.6e-11	1.24593e-09
green	GO:0071363	cellular response to growth factor stimu...	514	51	18.19	2.80374	1.6e-11	1.24593e-09
green	GO:0016055	Wnt receptor signaling pathway	268	35	9.48	3.69198	1.8e-11	1.38184e-09
green	GO:0010647	positive regulation of cell communicatio...	690	61	24.41	2.49898	1.9e-11	1.45176e-09
green	GO:0022407	regulation of cell-cell adhesion	62	17	2.19	7.76256	2.6e-11	1.95e-09
green	GO:0022617	extracellular matrix disassembly	62	17	2.19	7.76256	2.6e-11	1.95e-09
green	GO:0042692	muscle cell differentiation	272	35	9.62	3.63825	2.8e-11	2.09037e-09
green	GO:0016337	cell-cell adhesion	302	37	10.68	3.46442	3.2e-11	2.35656e-09
green	GO:0007417	central nervous system development	541	52	19.14	2.71682	3.3e-11	2.41926e-09
green	GO:0033993	response to lipid	379	42	13.41	3.13199	3.7e-11	2.68828e-09
green	GO:0030509	BMP signaling pathway	82	19	2.9	6.55172	4.4e-11	3.16858e-09
green	GO:0007517	muscle organ development	292	36	10.33	3.485	5e-11	3.5848e-09
green	GO:0060537	muscle tissue development	279	35	9.87	3.5461	5.7e-11	4.01591e-09
green	GO:0008285	negative regulation of cell proliferatio...	416	44	14.72	2.98913	5.7e-11	4.01591e-09
green	GO:0071310	cellular response to organic substance	1199	86	42.42	2.02735	6.7e-11	4.67994e-09
green	GO:0014706	striated muscle tissue development	268	34	9.48	3.5865	8e-11	5.54043e-09
green	GO:0032963	collagen metabolic process	76	18	2.69	6.69145	9.8e-11	6.75826e-09
green	GO:0000902	cell morphogenesis	816	66	28.87	2.28611	1.3e-10	8.77905e-09
green	GO:0001704	formation of primary germ layer	68	17	2.41	7.05394	1.3e-10	8.77905e-09
green	GO:0072006	nephron development	68	17	2.41	7.05394	1.3e-10	8.77905e-09
green	GO:0009968	negative regulation of signal transducti...	597	54	21.12	2.55682	1.4e-10	9.33811e-09
green	GO:0035051	cardiocyte differentiation	78	18	2.76	6.52174	1.6e-10	1.05425e-08
green	GO:0014031	mesenchymal cell development	98	20	3.47	5.76369	1.6e-10	1.05425e-08
green	GO:0009967	positive regulation of signal transducti...	655	57	23.17	2.46008	1.8e-10	1.18125e-08
green	GO:0042060	wound healing	467	46	16.52	2.7845	2.3e-10	1.48542e-08
green	GO:0048523	negative regulation of cellular process	2401	138	84.95	1.62448	2.7e-10	1.73002e-08
green	GO:0032879	regulation of localization	1131	81	40.01	2.02449	3e-10	1.90723e-08
green	GO:0001654	eye development	198	28	7.01	3.99429	3.2e-10	2.0186e-08
green	GO:0007492	endoderm development	46	14	1.63	8.58896	3.3e-10	2.07365e-08
green	GO:0051146	striated muscle cell differentiation	212	29	7.5	3.86667	3.5e-10	2.17414e-08
green	GO:0070887	cellular response to chemical stimulus	1452	96	51.37	1.8688	3.7e-10	2.27236e-08
green	GO:0030574	collagen catabolic process	55	15	1.95	7.69231	4.3e-10	2.61129e-08
green	GO:0023057	negative regulation of signaling	616	54	21.79	2.4782	4.3e-10	2.61129e-08
green	GO:0001822	kidney development	150	24	5.31	4.51977	4.8e-10	2.88266e-08
green	GO:0061448	connective tissue development	138	23	4.88	4.71311	4.8e-10	2.88266e-08
green	GO:0022008	neurogenesis	940	71	33.26	2.1347	4.9e-10	2.93189e-08
green	GO:0010648	negative regulation of cell communicatio...	619	54	21.9	2.46575	5.2e-10	3.08869e-08
green	GO:0030855	epithelial cell differentiation	349	38	12.35	3.07692	5.6e-10	3.30217e-08
green	GO:0008284	positive regulation of cell proliferatio...	465	45	16.45	2.73556	6.5e-10	3.80531e-08
green	GO:0007548	sex differentiation	178	26	6.3	4.12698	6.9e-10	4.01063e-08
green	GO:0048738	cardiac muscle tissue development	106	20	3.75	5.33333	6.9e-10	4.01063e-08
green	GO:0014070	response to organic cyclic compound	405	41	14.33	2.86113	1e-09	5.71053e-08
green	GO:0010628	positive regulation of gene expression	861	66	30.46	2.16678	1.2e-09	6.82867e-08
green	GO:2000736	regulation of stem cell differentiation	59	15	2.09	7.17703	1.3e-09	7.34635e-08
green	GO:0030182	neuron differentiation	823	64	29.12	2.1978	1.3e-09	7.34635e-08
green	GO:0048699	generation of neurons	887	67	31.38	2.13512	1.6e-09	9.01038e-08
green	GO:0048519	negative regulation of biological proces...	2609	144	92.31	1.55996	1.7e-09	9.54052e-08
green	GO:0022414	reproductive process	683	56	24.16	2.31788	2.4e-09	1.33767e-07
green	GO:0001667	ameboidal cell migration	176	25	6.23	4.01284	2.7e-09	1.48454e-07
green	GO:0060389	pathway-restricted SMAD protein phosphor...	30	11	1.06	10.3774	2.8e-09	1.53434e-07
green	GO:0001657	ureteric bud development	72	16	2.55	6.27451	3e-09	1.63842e-07
green	GO:0030111	regulation of Wnt receptor signaling pat...	164	24	5.8	4.13793	3.1e-09	1.68737e-07
green	GO:0048592	eye morphogenesis	93	18	3.29	5.47112	3.3e-09	1.77839e-07
green	GO:0055024	regulation of cardiac muscle tissue deve...	31	11	1.1	10	4.2e-09	2.22655e-07
green	GO:0043583	ear development	130	21	4.6	4.56522	5e-09	2.64205e-07
green	GO:0050673	epithelial cell proliferation	196	26	6.93	3.7518	5.7e-09	3.00218e-07
green	GO:0048545	response to steroid hormone stimulus	183	25	6.47	3.86399	6.1e-09	3.2025e-07
green	GO:0007411	axon guidance	300	33	10.61	3.11027	6.3e-09	3.2758e-07
green	GO:0097485	neuron projection guidance	300	33	10.61	3.11027	6.3e-09	3.2758e-07
green	GO:0051216	cartilage development	108	19	3.82	4.97382	6.3e-09	3.2758e-07
green	GO:0030510	regulation of BMP signaling pathway	48	13	1.7	7.64706	7e-09	3.61667e-07
green	GO:0044763	single-organism cellular process	7522	316	266.13	1.18739	8e-09	4.09434e-07
green	GO:0060070	canonical Wnt receptor signaling pathway	159	23	5.63	4.08526	8.3e-09	4.19511e-07
green	GO:0045596	negative regulation of cell differentiat...	335	35	11.85	2.95359	8.3e-09	4.19511e-07
green	GO:0001706	endoderm formation	26	10	0.92	10.8696	8.8e-09	4.40677e-07
green	GO:0048608	reproductive structure development	188	25	6.65	3.7594	1.1e-08	5.40861e-07
green	GO:0051240	positive regulation of multicellular org...	388	38	13.73	2.76766	1.1e-08	5.40861e-07
green	GO:0061458	reproductive system development	189	25	6.69	3.73692	1.2e-08	5.84731e-07
green	GO:0048705	skeletal system morphogenesis	124	20	4.39	4.55581	1.2e-08	5.84731e-07
green	GO:0016202	regulation of striated muscle tissue dev...	90	17	3.18	5.34591	1.3e-08	6.29687e-07
green	GO:0001503	ossification	204	26	7.22	3.60111	1.3e-08	6.29687e-07
green	GO:0031589	cell-substrate adhesion	191	25	6.76	3.69822	1.5e-08	7.13816e-07
green	GO:0048634	regulation of muscle organ development	91	17	3.22	5.2795	1.6e-08	7.54783e-07
green	GO:0048736	appendage development	103	18	3.64	4.94505	1.8e-08	8.4181e-07
green	GO:0060173	limb development	103	18	3.64	4.94505	1.8e-08	8.4181e-07
green	GO:1901861	regulation of muscle tissue development	92	17	3.25	5.23077	1.9e-08	8.75992e-07
green	GO:0009798	axis specification	61	14	2.16	6.48148	1.9e-08	8.75992e-07
green	GO:0055007	cardiac muscle cell differentiation	61	14	2.16	6.48148	1.9e-08	8.75992e-07
green	GO:0071495	cellular response to endogenous stimulus	629	51	22.25	2.29213	2e-08	9.16901e-07
green	GO:0048584	positive regulation of response to stimu...	923	66	32.66	2.02082	2e-08	9.16901e-07
green	GO:0048565	digestive tract development	82	16	2.9	5.51724	2.2e-08	1.00294e-06
green	GO:1901700	response to oxygen-containing compound	767	58	27.14	2.13707	2.4e-08	1.09106e-06
green	GO:0050886	endocrine process	36	11	1.27	8.66142	2.6e-08	1.17542e-06
green	GO:0065008	regulation of biological quality	2225	124	78.72	1.5752	2.6e-08	1.17542e-06
green	GO:0048771	tissue remodeling	84	16	2.97	5.38721	3.1e-08	1.38606e-06
green	GO:0045765	regulation of angiogenesis	119	19	4.21	4.51306	3.3e-08	1.47144e-06
green	GO:1901342	regulation of vasculature development	132	20	4.67	4.28266	3.6e-08	1.60082e-06
magenta	GO:0048199	vesicle targeting, to, from or within Go...	26	3	0.17	17.6471	0.00066	0.0117265
magenta	GO:0043687	post-translational protein modification	169	6	1.13	5.30973	0.00089	0.0147203
magenta	GO:0030198	extracellular matrix organization	245	7	1.63	4.29448	0.00119	0.0182194
magenta	GO:0043062	extracellular structure organization	246	7	1.64	4.26829	0.00122	0.0185392
magenta	GO:0010951	negative regulation of endopeptidase act...	77	4	0.51	7.84314	0.0017	0.0241638
magenta	GO:0006901	vesicle coating	36	3	0.24	12.5	0.00173	0.0245259
magenta	GO:0006903	vesicle targeting	36	3	0.24	12.5	0.00173	0.0245259
magenta	GO:0010466	negative regulation of peptidase activit...	78	4	0.52	7.69231	0.00178	0.0250168
magenta	GO:0006662	glycerol ether metabolic process	11	2	0.07	28.5714	0.00232	0.0304992
magenta	GO:0006900	membrane budding	40	3	0.27	11.1111	0.00235	0.0307693
magenta	GO:0018279	protein N-linked glycosylation via aspar...	91	4	0.61	6.55738	0.00313	0.0383013
magenta	GO:0006486	protein glycosylation	218	6	1.45	4.13793	0.00326	0.0391561
magenta	GO:0043413	macromolecule glycosylation	218	6	1.45	4.13793	0.00326	0.0391561
magenta	GO:0032483	regulation of Rab protein signal transdu...	13	2	0.09	22.2222	0.00326	0.0391561
magenta	GO:0035964	COPI-coated vesicle budding	13	2	0.09	22.2222	0.00326	0.0391561
magenta	GO:0048200	Golgi transport vesicle coating	13	2	0.09	22.2222	0.00326	0.0391561
magenta	GO:0048205	COPI coating of Golgi vesicle	13	2	0.09	22.2222	0.00326	0.0391561
magenta	GO:0018196	peptidyl-asparagine modification	92	4	0.61	6.55738	0.00326	0.0391561
magenta	GO:0070085	glycosylation	221	6	1.47	4.08163	0.00348	0.0412505
magenta	GO:0032482	Rab protein signal transduction	14	2	0.09	22.2222	0.00378	0.0440369
magenta	GO:0042559	pteridine-containing compound biosynthet...	14	2	0.09	22.2222	0.00378	0.0440369
magenta	GO:0048194	Golgi vesicle budding	14	2	0.09	22.2222	0.00378	0.0440369
magenta	GO:0006487	protein N-linked glycosylation	97	4	0.65	6.15385	0.00394	0.0455423
magenta	GO:0009100	glycoprotein metabolic process	314	7	2.09	3.34928	0.0048	0.0533242
magenta	GO:0018904	ether metabolic process	18	2	0.12	16.6667	0.00625	0.0654982
magenta	GO:0006457	protein folding	176	5	1.17	4.2735	0.0063	0.0658526
magenta	GO:0065009	regulation of molecular function	1503	18	10.01	1.7982	0.00852	0.0826359
magenta	GO:0009101	glycoprotein biosynthetic process	271	6	1.81	3.31492	0.00925	0.0880373
magenta	GO:0005975	carbohydrate metabolic process	642	10	4.28	2.33645	0.00979	0.0919401
magenta	GO:0014037	Schwann cell differentiation	24	2	0.16	12.5	0.01099	0.0988735
magenta	GO:0006890	retrograde vesicle-mediated transport, G...	25	2	0.17	11.7647	0.0119	0.104349
magenta	GO:0075733	intracellular transport of viral materia...	25	2	0.17	11.7647	0.0119	0.104349
magenta	GO:0060674	placenta blood vessel development	26	2	0.17	11.7647	0.01283	0.110015
magenta	GO:0042558	pteridine-containing compound metabolic ...	28	2	0.19	10.5263	0.0148	0.121284
magenta	GO:0043170	macromolecule metabolic process	6064	50	40.4	1.23762	0.01561	0.126129
magenta	GO:0044766	multi-organism transport	29	2	0.19	10.5263	0.01583	0.126539
magenta	GO:0050999	regulation of nitric-oxide synthase acti...	29	2	0.19	10.5263	0.01583	0.126539
magenta	GO:0009311	oligosaccharide metabolic process	31	2	0.21	9.52381	0.01797	0.137564
magenta	GO:0030199	collagen fibril organization	32	2	0.21	9.52381	0.01909	0.142593
magenta	GO:0060711	labyrinthine layer development	32	2	0.21	9.52381	0.01909	0.142593
magenta	GO:0032768	regulation of monooxygenase activity	33	2	0.22	9.09091	0.02023	0.147928
magenta	GO:0090003	regulation of establishment of protein l...	34	2	0.23	8.69565	0.02141	0.152904
magenta	GO:0006809	nitric oxide biosynthetic process	36	2	0.24	8.33333	0.02384	0.163436
magenta	GO:0050790	regulation of catalytic activity	1195	14	7.96	1.75879	0.02478	0.168531
magenta	GO:0051656	establishment of organelle localization	168	4	1.12	3.57143	0.02562	0.17152
magenta	GO:0031294	lymphocyte costimulation	38	2	0.25	8	0.02637	0.175029
magenta	GO:0031295	T cell costimulation	38	2	0.25	8	0.02637	0.175029
magenta	GO:0051346	negative regulation of hydrolase activit...	174	4	1.16	3.44828	0.02866	0.184073
magenta	GO:0016050	vesicle organization	100	3	0.67	4.47761	0.02897	0.185434
magenta	GO:0010001	glial cell differentiation	101	3	0.67	4.47761	0.02971	0.187842
magenta	GO:0050870	positive regulation of T cell activation	103	3	0.69	4.34783	0.03124	0.194058
magenta	GO:0048193	Golgi vesicle transport	180	4	1.2	3.33333	0.03191	0.195618
magenta	GO:0052548	regulation of endopeptidase activity	184	4	1.23	3.25203	0.03419	0.205405
magenta	GO:2001237	negative regulation of extrinsic apoptot...	44	2	0.29	6.89655	0.03459	0.205983
magenta	GO:0051341	regulation of oxidoreductase activity	45	2	0.3	6.66667	0.03605	0.211261
magenta	GO:0051650	establishment of vesicle localization	109	3	0.73	4.10959	0.03606	0.211261
magenta	GO:0044723	single-organism carbohydrate metabolic p...	472	7	3.14	2.2293	0.03724	0.212866
magenta	GO:0052547	regulation of peptidase activity	190	4	1.27	3.14961	0.03778	0.215498
magenta	GO:0051028	mRNA transport	112	3	0.75	4	0.0386	0.218814
magenta	GO:0045454	cell redox homeostasis	48	2	0.32	6.25	0.04056	0.224988
magenta	GO:0046209	nitric oxide metabolic process	50	2	0.33	6.06061	0.04367	0.235653
magenta	GO:0019219	regulation of nucleobase-containing comp...	2850	26	18.99	1.36914	0.04419	0.237592
magenta	GO:0051168	nuclear export	120	3	0.8	3.75	0.04583	0.244312
magenta	GO:0042063	gliogenesis	121	3	0.81	3.7037	0.04677	0.24806
magenta	GO:0009059	macromolecule biosynthetic process	3562	31	23.73	1.30636	0.0475	0.249799
magenta	GO:0006464	cellular protein modification process	2200	21	14.66	1.43247	0.04796	0.251628
magenta	GO:0036211	protein modification process	2200	21	14.66	1.43247	0.04796	0.251628
magenta	GO:0007422	peripheral nervous system development	54	2	0.36	5.55556	0.05016	0.260151
magenta	GO:0006986	response to unfolded protein	125	3	0.83	3.61446	0.05066	0.261743
magenta	GO:0006493	protein O-linked glycosylation	56	2	0.37	5.40541	0.05353	0.272847
magenta	GO:0050657	nucleic acid transport	128	3	0.85	3.52941	0.05367	0.273218
magenta	GO:0050658	RNA transport	128	3	0.85	3.52941	0.05367	0.273218
magenta	GO:0051236	establishment of RNA localization	128	3	0.85	3.52941	0.05367	0.273218
magenta	GO:0006913	nucleocytoplasmic transport	308	5	2.05	2.43902	0.05424	0.274983
magenta	GO:0051336	regulation of hydrolase activity	624	8	4.16	1.92308	0.05498	0.278407
magenta	GO:0044260	cellular macromolecule metabolic process	5654	45	37.67	1.19458	0.055	0.278421
magenta	GO:0051169	nuclear transport	312	5	2.08	2.40385	0.05673	0.28475
magenta	GO:0016044	cellular membrane organization	630	8	4.2	1.90476	0.05754	0.287347
magenta	GO:0035966	response to topologically incorrect prot...	132	3	0.88	3.40909	0.05782	0.288303
magenta	GO:0061024	membrane organization	631	8	4.2	1.90476	0.05797	0.288962
magenta	GO:0051171	regulation of nitrogen compound metaboli...	2925	26	19.49	1.33402	0.05862	0.29131
magenta	GO:0051648	vesicle localization	133	3	0.89	3.37079	0.05888	0.291889
magenta	GO:1901137	carbohydrate derivative biosynthetic pro...	528	7	3.52	1.98864	0.06129	0.301905
magenta	GO:0006403	RNA localization	136	3	0.91	3.2967	0.06212	0.305716
magenta	GO:0051251	positive regulation of lymphocyte activa...	136	3	0.91	3.2967	0.06212	0.305716
magenta	GO:0006987	activation of signaling protein activity...	61	2	0.41	4.87805	0.06228	0.306411
magenta	GO:0030162	regulation of proteolysis	137	3	0.91	3.2967	0.06322	0.309632
magenta	GO:0051640	organelle localization	226	4	1.51	2.64901	0.06377	0.312137
magenta	GO:0006878	cellular copper ion homeostasis	10	1	0.07	14.2857	0.06468	0.31517
magenta	GO:0006999	nuclear pore organization	10	1	0.07	14.2857	0.06468	0.31517
magenta	GO:0007183	SMAD protein complex assembly	10	1	0.07	14.2857	0.06468	0.31517
magenta	GO:0007440	foregut morphogenesis	10	1	0.07	14.2857	0.06468	0.31517
magenta	GO:0010837	regulation of keratinocyte proliferation	10	1	0.07	14.2857	0.06468	0.31517
magenta	GO:0031581	hemidesmosome assembly	10	1	0.07	14.2857	0.06468	0.31517
magenta	GO:0034766	negative regulation of ion transmembrane...	10	1	0.07	14.2857	0.06468	0.31517
magenta	GO:0042640	anagen	10	1	0.07	14.2857	0.06468	0.31517
magenta	GO:0043217	myelin maintenance	10	1	0.07	14.2857	0.06468	0.31517
magenta	GO:0045725	positive regulation of glycogen biosynth...	10	1	0.07	14.2857	0.06468	0.31517
magenta	GO:0050706	regulation of interleukin-1 beta secreti...	10	1	0.07	14.2857	0.06468	0.31517
magenta	GO:0050995	negative regulation of lipid catabolic p...	10	1	0.07	14.2857	0.06468	0.31517
magenta	GO:0051382	kinetochore assembly	10	1	0.07	14.2857	0.06468	0.31517
magenta	GO:0006406	mRNA export from nucleus	63	2	0.42	4.7619	0.06591	0.319727
magenta	GO:0032075	positive regulation of nuclease activity	63	2	0.42	4.7619	0.06591	0.319727
magenta	GO:0043086	negative regulation of catalytic activit...	434	6	2.89	2.07612	0.06876	0.331478
magenta	GO:0002696	positive regulation of leukocyte activat...	142	3	0.95	3.15789	0.06884	0.331765
magenta	GO:0006516	glycoprotein catabolic process	11	1	0.07	14.2857	0.07092	0.339078
magenta	GO:0009074	aromatic amino acid family catabolic pro...	11	1	0.07	14.2857	0.07092	0.339078
magenta	GO:0010389	regulation of G2/M transition of mitotic...	11	1	0.07	14.2857	0.07092	0.339078
magenta	GO:0031998	regulation of fatty acid beta-oxidation	11	1	0.07	14.2857	0.07092	0.339078
magenta	GO:0032094	response to food	11	1	0.07	14.2857	0.07092	0.339078
magenta	GO:0032715	negative regulation of interleukin-6 pro...	11	1	0.07	14.2857	0.07092	0.339078
magenta	GO:0034763	negative regulation of transmembrane tra...	11	1	0.07	14.2857	0.07092	0.339078
magenta	GO:0040037	negative regulation of fibroblast growth...	11	1	0.07	14.2857	0.07092	0.339078
magenta	GO:0045922	negative regulation of fatty acid metabo...	11	1	0.07	14.2857	0.07092	0.339078
magenta	GO:0050704	regulation of interleukin-1 secretion	11	1	0.07	14.2857	0.07092	0.339078
magenta	GO:0051085	chaperone mediated protein folding requi...	11	1	0.07	14.2857	0.07092	0.339078
magenta	GO:0060713	labyrinthine layer morphogenesis	11	1	0.07	14.2857	0.07092	0.339078
magenta	GO:0070875	positive regulation of glycogen metaboli...	11	1	0.07	14.2857	0.07092	0.339078
magenta	GO:0050863	regulation of T cell activation	144	3	0.96	3.125	0.07115	0.340078
magenta	GO:0001892	embryonic placenta development	66	2	0.44	4.54545	0.07149	0.341503
magenta	GO:0043412	macromolecule modification	2303	21	15.34	1.36897	0.07259	0.346351
magenta	GO:0032069	regulation of nuclease activity	67	2	0.45	4.44444	0.07338	0.34875
magenta	GO:0015931	nucleobase-containing compound transport	146	3	0.97	3.09278	0.0735	0.34875
magenta	GO:0050867	positive regulation of cell activation	148	3	0.99	3.0303	0.07588	0.358996
magenta	GO:0019082	viral protein processing	12	1	0.08	12.5	0.07711	0.364286
magenta	GO:0046788	egress of virus within host cell	12	1	0.08	12.5	0.07711	0.364286
magenta	GO:0050702	interleukin-1 beta secretion	12	1	0.08	12.5	0.07711	0.364286
magenta	GO:0010827	regulation of glucose transport	70	2	0.47	4.25532	0.07915	0.372087
magenta	GO:0051252	regulation of RNA metabolic process	2462	22	16.4	1.34146	0.07933	0.372718
magenta	GO:0071704	organic substance metabolic process	7336	55	48.87	1.12543	0.08064	0.378545
magenta	GO:0090002	establishment of protein localization to...	71	2	0.47	4.25532	0.0811	0.380595
magenta	GO:0035150	regulation of tube size	72	2	0.48	4.16667	0.08307	0.388872
magenta	GO:0050880	regulation of blood vessel size	72	2	0.48	4.16667	0.08307	0.388872
magenta	GO:0006882	cellular zinc ion homeostasis	13	1	0.09	11.1111	0.08327	0.388872
magenta	GO:0032731	positive regulation of interleukin-1 bet...	13	1	0.09	11.1111	0.08327	0.388872
magenta	GO:0032732	positive regulation of interleukin-1 pro...	13	1	0.09	11.1111	0.08327	0.388872
magenta	GO:0043496	regulation of protein homodimerization a...	13	1	0.09	11.1111	0.08327	0.388872
magenta	GO:0046174	polyol catabolic process	13	1	0.09	11.1111	0.08327	0.388872
magenta	GO:0048820	hair follicle maturation	13	1	0.09	11.1111	0.08327	0.388872
magenta	GO:0051383	kinetochore organization	13	1	0.09	11.1111	0.08327	0.388872
magenta	GO:0055069	zinc ion homeostasis	13	1	0.09	11.1111	0.08327	0.388872
magenta	GO:0055070	copper ion homeostasis	13	1	0.09	11.1111	0.08327	0.388872
magenta	GO:0060644	mammary gland epithelial cell differenti...	13	1	0.09	11.1111	0.08327	0.388872
magenta	GO:0071364	cellular response to epidermal growth fa...	13	1	0.09	11.1111	0.08327	0.388872
magenta	GO:1900407	regulation of cellular response to oxida...	13	1	0.09	11.1111	0.08327	0.388872
magenta	GO:0044092	negative regulation of molecular functio...	569	7	3.79	1.84697	0.0839	0.391589
magenta	GO:0006405	RNA export from nucleus	73	2	0.49	4.08163	0.08505	0.39537
magenta	GO:0051098	regulation of binding	156	3	1.04	2.88462	0.08573	0.398417
magenta	GO:0006351	transcription, DNA-dependent	2621	23	17.46	1.3173	0.08592	0.399186
magenta	GO:0000079	regulation of cyclin-dependent protein s...	74	2	0.49	4.08163	0.08705	0.403859
magenta	GO:0042552	myelination	74	2	0.49	4.08163	0.08705	0.403859
magenta	GO:2001236	regulation of extrinsic apoptotic signal...	75	2	0.5	4	0.08906	0.412202
magenta	GO:0009072	aromatic amino acid family metabolic pro...	14	1	0.09	11.1111	0.08938	0.412202
magenta	GO:0019068	virion assembly	14	1	0.09	11.1111	0.08938	0.412202
magenta	GO:0022011	myelination in peripheral nervous system	14	1	0.09	11.1111	0.08938	0.412202
magenta	GO:0032292	peripheral nervous system axon ensheathm...	14	1	0.09	11.1111	0.08938	0.412202
magenta	GO:0033198	response to ATP	14	1	0.09	11.1111	0.08938	0.412202
magenta	GO:0034383	low-density lipoprotein particle clearan...	14	1	0.09	11.1111	0.08938	0.412202
magenta	GO:0045737	positive regulation of cyclin-dependent ...	14	1	0.09	11.1111	0.08938	0.412202
magenta	GO:0048207	vesicle targeting, rough ER to cis-Golgi	14	1	0.09	11.1111	0.08938	0.412202
magenta	GO:0048208	COPII vesicle coating	14	1	0.09	11.1111	0.08938	0.412202
magenta	GO:0048339	paraxial mesoderm development	14	1	0.09	11.1111	0.08938	0.412202
magenta	GO:0050701	interleukin-1 secretion	14	1	0.09	11.1111	0.08938	0.412202
magenta	GO:0051155	positive regulation of striated muscle c...	14	1	0.09	11.1111	0.08938	0.412202
magenta	GO:0060669	embryonic placenta morphogenesis	14	1	0.09	11.1111	0.08938	0.412202
magenta	GO:0060706	cell differentiation involved in embryon...	14	1	0.09	11.1111	0.08938	0.412202
magenta	GO:2000191	regulation of fatty acid transport	14	1	0.09	11.1111	0.08938	0.412202
magenta	GO:0032963	collagen metabolic process	76	2	0.51	3.92157	0.09109	0.419138
magenta	GO:0046916	cellular transition metal ion homeostasi...	76	2	0.51	3.92157	0.09109	0.419138
magenta	GO:0007272	ensheathment of neurons	77	2	0.51	3.92157	0.09313	0.427799
magenta	GO:0008366	axon ensheathment	77	2	0.51	3.92157	0.09313	0.427799
magenta	GO:2001234	negative regulation of apoptotic signali...	77	2	0.51	3.92157	0.09313	0.427799
magenta	GO:0006892	post-Golgi vesicle-mediated transport	78	2	0.52	3.84615	0.09518	0.435985
magenta	GO:0006829	zinc ion transport	15	1	0.1	10	0.09546	0.43653
magenta	GO:0032369	negative regulation of lipid transport	15	1	0.1	10	0.09546	0.43653
magenta	GO:0051353	positive regulation of oxidoreductase ac...	15	1	0.1	10	0.09546	0.43653
magenta	GO:0090114	COPII-coated vesicle budding	15	1	0.1	10	0.09546	0.43653
magenta	GO:1900087	positive regulation of G1/S transition o...	15	1	0.1	10	0.09546	0.43653
magenta	GO:1901976	regulation of cell cycle checkpoint	15	1	0.1	10	0.09546	0.43653
magenta	GO:0080090	regulation of primary metabolic process	3634	30	24.21	1.23916	0.09565	0.437276
magenta	GO:0034645	cellular macromolecule biosynthetic proc...	3494	29	23.28	1.2457	0.0963	0.440124
magenta	GO:0006355	regulation of transcription, DNA-depende...	2383	21	15.88	1.32242	0.09708	0.44344
magenta	GO:0019886	antigen processing and presentation of e...	79	2	0.53	3.77358	0.09725	0.443843
magenta	GO:0045732	positive regulation of protein catabolic...	79	2	0.53	3.77358	0.09725	0.443843
magenta	GO:0090288	negative regulation of cellular response...	79	2	0.53	3.77358	0.09725	0.443843
magenta	GO:0000381	regulation of alternative mRNA splicing,...	16	1	0.11	9.09091	0.10149	0.461254
magenta	GO:0007004	telomere maintenance via telomerase	16	1	0.11	9.09091	0.10149	0.461254
magenta	GO:0014044	Schwann cell development	16	1	0.11	9.09091	0.10149	0.461254
magenta	GO:0030866	cortical actin cytoskeleton organization	16	1	0.11	9.09091	0.10149	0.461254
magenta	GO:0032288	myelin assembly	16	1	0.11	9.09091	0.10149	0.461254
magenta	GO:0045124	regulation of bone resorption	16	1	0.11	9.09091	0.10149	0.461254
magenta	GO:0046320	regulation of fatty acid oxidation	16	1	0.11	9.09091	0.10149	0.461254
magenta	GO:0046856	phosphatidylinositol dephosphorylation	16	1	0.11	9.09091	0.10149	0.461254
magenta	GO:0060716	labyrinthine layer blood vessel developm...	16	1	0.11	9.09091	0.10149	0.461254
magenta	GO:0070306	lens fiber cell differentiation	16	1	0.11	9.09091	0.10149	0.461254
magenta	GO:0090342	regulation of cell aging	16	1	0.11	9.09091	0.10149	0.461254
magenta	GO:1901099	negative regulation of signal transducti...	16	1	0.11	9.09091	0.10149	0.461254
magenta	GO:1902001	fatty acid transmembrane transport	16	1	0.11	9.09091	0.10149	0.461254
magenta	GO:2001240	negative regulation of extrinsic apoptot...	16	1	0.11	9.09091	0.10149	0.461254
magenta	GO:2001141	regulation of RNA biosynthetic process	2399	21	15.98	1.31414	0.10258	0.466077
greenyellow	GO:0034383	low-density lipoprotein particle clearan...	14	3	0.08	37.5	6.6e-05	0.0017325
greenyellow	GO:0042632	cholesterol homeostasis	39	4	0.23	17.3913	7.5e-05	0.00192528
greenyellow	GO:0055092	sterol homeostasis	40	4	0.23	17.3913	8.3e-05	0.00209106
greenyellow	GO:0055088	lipid homeostasis	58	4	0.34	11.7647	0.00036	0.00727826
greenyellow	GO:0034381	plasma lipoprotein particle clearance	25	3	0.15	20	0.0004	0.00781513
greenyellow	GO:0097006	regulation of plasma lipoprotein particl...	39	3	0.23	13.0435	0.0015	0.0218359
greenyellow	GO:0009074	aromatic amino acid family catabolic pro...	11	2	0.06	33.3333	0.00179	0.0250492
greenyellow	GO:0010885	regulation of cholesterol storage	11	2	0.06	33.3333	0.00179	0.0250492
greenyellow	GO:0010878	cholesterol storage	12	2	0.07	28.5714	0.00214	0.0289273
greenyellow	GO:0010884	positive regulation of lipid storage	13	2	0.08	25	0.00252	0.0324984
greenyellow	GO:0002532	production of molecular mediator involve...	14	2	0.08	25	0.00293	0.0363458
greenyellow	GO:0009072	aromatic amino acid family metabolic pro...	14	2	0.08	25	0.00293	0.0363458
greenyellow	GO:0007603	phototransduction, visible light	51	3	0.3	10	0.00326	0.0391561
greenyellow	GO:0009584	detection of visible light	55	3	0.32	9.375	0.00404	0.0464343
greenyellow	GO:0007602	phototransduction	59	3	0.35	8.57143	0.00492	0.0544344
greenyellow	GO:0022400	regulation of rhodopsin mediated signali...	19	2	0.11	18.1818	0.00541	0.0586985
greenyellow	GO:0042060	wound healing	467	8	2.73	2.9304	0.00566	0.0607228
greenyellow	GO:0009583	detection of light stimulus	63	3	0.37	8.10811	0.00591	0.0627841
greenyellow	GO:0016056	rhodopsin mediated signaling pathway	21	2	0.12	16.6667	0.00659	0.0682701
greenyellow	GO:0051606	detection of stimulus	128	4	0.75	5.33333	0.00662	0.0684501
greenyellow	GO:0048878	chemical homeostasis	481	8	2.81	2.84698	0.00673	0.0693233
greenyellow	GO:1901606	alpha-amino acid catabolic process	66	3	0.39	7.69231	0.00673	0.0693233
greenyellow	GO:0015711	organic anion transport	205	5	1.2	4.16667	0.00687	0.0702761
greenyellow	GO:0044282	small molecule catabolic process	206	5	1.21	4.13223	0.00701	0.071127
greenyellow	GO:0044712	single-organism catabolic process	206	5	1.21	4.13223	0.00701	0.071127
greenyellow	GO:0006811	ion transport	738	10	4.32	2.31481	0.01014	0.0944099
greenyellow	GO:0042157	lipoprotein metabolic process	78	3	0.46	6.52174	0.01065	0.0975401
greenyellow	GO:0010883	regulation of lipid storage	27	2	0.16	12.5	0.01077	0.097922
greenyellow	GO:0015849	organic acid transport	148	4	0.87	4.5977	0.01093	0.0988254
greenyellow	GO:0046942	carboxylic acid transport	148	4	0.87	4.5977	0.01093	0.0988254
greenyellow	GO:0006820	anion transport	232	5	1.36	3.67647	0.01138	0.101207
greenyellow	GO:0009611	response to wounding	751	10	4.39	2.2779	0.01138	0.101207
greenyellow	GO:0016054	organic acid catabolic process	160	4	0.94	4.25532	0.01422	0.118244
greenyellow	GO:0046395	carboxylic acid catabolic process	160	4	0.94	4.25532	0.01422	0.118244
greenyellow	GO:0009063	cellular amino acid catabolic process	87	3	0.51	5.88235	0.0143	0.118244
greenyellow	GO:0015850	organic hydroxy compound transport	89	3	0.52	5.76923	0.01519	0.123752
greenyellow	GO:0006865	amino acid transport	90	3	0.53	5.66038	0.01565	0.126129
greenyellow	GO:0055074	calcium ion homeostasis	169	4	0.99	4.0404	0.01706	0.133872
greenyellow	GO:0006576	cellular biogenic amine metabolic proces...	93	3	0.54	5.55556	0.01708	0.133883
greenyellow	GO:0009582	detection of abiotic stimulus	94	3	0.55	5.45455	0.01757	0.13578
greenyellow	GO:0009581	detection of external stimulus	97	3	0.57	5.26316	0.01909	0.142593
greenyellow	GO:0007041	lysosomal transport	37	2	0.22	9.09091	0.01969	0.145265
greenyellow	GO:0044763	single-organism cellular process	7522	52	44.02	1.18128	0.0201	0.147488
greenyellow	GO:0051260	protein homooligomerization	178	4	1.04	3.84615	0.02023	0.147928
greenyellow	GO:0032101	regulation of response to external stimu...	270	5	1.58	3.16456	0.02065	0.150236
greenyellow	GO:0072507	divalent inorganic cation homeostasis	180	4	1.05	3.80952	0.02098	0.15189
greenyellow	GO:0031669	cellular response to nutrient levels	102	3	0.6	5	0.02177	0.154315
greenyellow	GO:0007596	blood coagulation	375	6	2.19	2.73973	0.02203	0.155634
greenyellow	GO:0007599	hemostasis	377	6	2.21	2.71493	0.02255	0.158395
greenyellow	GO:0050817	coagulation	378	6	2.21	2.71493	0.02281	0.158511
greenyellow	GO:0007601	visual perception	104	3	0.61	4.91803	0.02291	0.158799
greenyellow	GO:0051259	protein oligomerization	278	5	1.63	3.06748	0.02309	0.159503
greenyellow	GO:0007034	vacuolar transport	41	2	0.24	8.33333	0.02388	0.163503
greenyellow	GO:0050953	sensory perception of light stimulus	108	3	0.63	4.7619	0.02526	0.170087
greenyellow	GO:0019915	lipid storage	43	2	0.25	8	0.0261	0.173804
greenyellow	GO:1901880	negative regulation of protein depolymer...	44	2	0.26	7.69231	0.02724	0.178045
greenyellow	GO:0043242	negative regulation of protein complex d...	45	2	0.26	7.69231	0.0284	0.183045
greenyellow	GO:0032870	cellular response to hormone stimulus	302	5	1.77	2.82486	0.03152	0.195052
greenyellow	GO:0046470	phosphatidylcholine metabolic process	48	2	0.28	7.14286	0.032	0.195789
greenyellow	GO:0031668	cellular response to extracellular stimu...	121	3	0.71	4.22535	0.03379	0.203528
greenyellow	GO:0044093	positive regulation of molecular functio...	905	10	5.3	1.88679	0.03646	0.211924
greenyellow	GO:1901879	regulation of protein depolymerization	52	2	0.3	6.66667	0.03707	0.212691
greenyellow	GO:1901615	organic hydroxy compound metabolic proce...	321	5	1.88	2.65957	0.03941	0.222429
greenyellow	GO:0071705	nitrogen compound transport	434	6	2.54	2.3622	0.04085	0.226211
greenyellow	GO:0009605	response to external stimulus	930	10	5.44	1.83824	0.04272	0.232586
greenyellow	GO:0007264	small GTPase mediated signal transductio...	557	7	3.26	2.14724	0.04336	0.234777
greenyellow	GO:0042592	homeostatic process	804	9	4.7	1.91489	0.04345	0.234777
greenyellow	GO:0071482	cellular response to light stimulus	57	2	0.33	6.06061	0.04379	0.236066
greenyellow	GO:0050878	regulation of body fluid levels	444	6	2.6	2.30769	0.04482	0.240028
greenyellow	GO:0044699	single-organism process	8160	54	47.75	1.13089	0.04798	0.251651
greenyellow	GO:0051261	protein depolymerization	60	2	0.35	5.71429	0.04803	0.251833
greenyellow	GO:0050801	ion homeostasis	341	5	2	2.5	0.04892	0.255922
greenyellow	GO:0042129	regulation of T cell proliferation	61	2	0.36	5.55556	0.04948	0.257527
greenyellow	GO:0043244	regulation of protein complex disassembl...	62	2	0.36	5.55556	0.05094	0.262437
greenyellow	GO:0043543	protein acylation	146	3	0.85	3.52941	0.05385	0.274049
greenyellow	GO:0042439	ethanolamine-containing compound metabol...	64	2	0.37	5.40541	0.05391	0.274269
greenyellow	GO:0006702	androgen biosynthetic process	10	1	0.06	16.6667	0.05702	0.2851
greenyellow	GO:0010829	negative regulation of glucose transport	10	1	0.06	16.6667	0.05702	0.2851
greenyellow	GO:0034375	high-density lipoprotein particle remode...	10	1	0.06	16.6667	0.05702	0.2851
greenyellow	GO:0042136	neurotransmitter biosynthetic process	10	1	0.06	16.6667	0.05702	0.2851
greenyellow	GO:0051016	barbed-end actin filament capping	10	1	0.06	16.6667	0.05702	0.2851
greenyellow	GO:0051560	mitochondrial calcium ion homeostasis	10	1	0.06	16.6667	0.05702	0.2851
greenyellow	GO:0071295	cellular response to vitamin	10	1	0.06	16.6667	0.05702	0.2851
greenyellow	GO:0090312	positive regulation of protein deacetyla...	10	1	0.06	16.6667	0.05702	0.2851
greenyellow	GO:0044106	cellular amine metabolic process	151	3	0.88	3.40909	0.05842	0.290455
greenyellow	GO:0071822	protein complex subunit organization	986	10	5.77	1.7331	0.05936	0.294089
greenyellow	GO:0035556	intracellular signal transduction	1691	15	9.9	1.51515	0.06096	0.300553
greenyellow	GO:0019722	calcium-mediated signaling	69	2	0.4	5	0.06158	0.303242
greenyellow	GO:0009310	amine catabolic process	11	1	0.06	16.6667	0.06254	0.306855
greenyellow	GO:0021884	forebrain neuron development	11	1	0.06	16.6667	0.06254	0.306855
greenyellow	GO:0042402	cellular biogenic amine catabolic proces...	11	1	0.06	16.6667	0.06254	0.306855
greenyellow	GO:0045742	positive regulation of epidermal growth ...	11	1	0.06	16.6667	0.06254	0.306855
greenyellow	GO:0090208	positive regulation of triglyceride meta...	11	1	0.06	16.6667	0.06254	0.306855
greenyellow	GO:0097066	response to thyroid hormone stimulus	11	1	0.06	16.6667	0.06254	0.306855
greenyellow	GO:2000278	regulation of DNA biosynthetic process	11	1	0.06	16.6667	0.06254	0.306855
greenyellow	GO:0006461	protein complex assembly	732	8	4.28	1.86916	0.06258	0.306959
greenyellow	GO:0070271	protein complex biogenesis	734	8	4.3	1.86047	0.06338	0.310322
greenyellow	GO:0009308	amine metabolic process	157	3	0.92	3.26087	0.06413	0.313805
greenyellow	GO:1901565	organonitrogen compound catabolic proces...	613	7	3.59	1.94986	0.06603	0.320214
greenyellow	GO:0006066	alcohol metabolic process	263	4	1.54	2.5974	0.06778	0.328211
greenyellow	GO:0002507	tolerance induction	12	1	0.07	14.2857	0.06804	0.328394
greenyellow	GO:0002828	regulation of type 2 immune response	12	1	0.07	14.2857	0.06804	0.328394
greenyellow	GO:0032781	positive regulation of ATPase activity	12	1	0.07	14.2857	0.06804	0.328394
greenyellow	GO:0043030	regulation of macrophage activation	12	1	0.07	14.2857	0.06804	0.328394
greenyellow	GO:0043691	reverse cholesterol transport	12	1	0.07	14.2857	0.06804	0.328394
greenyellow	GO:0045076	regulation of interleukin-2 biosynthetic...	12	1	0.07	14.2857	0.06804	0.328394
greenyellow	GO:0046189	phenol-containing compound biosynthetic ...	12	1	0.07	14.2857	0.06804	0.328394
greenyellow	GO:0055090	acylglycerol homeostasis	12	1	0.07	14.2857	0.06804	0.328394
greenyellow	GO:0070328	triglyceride homeostasis	12	1	0.07	14.2857	0.06804	0.328394
greenyellow	GO:1901186	positive regulation of ERBB signaling pa...	12	1	0.07	14.2857	0.06804	0.328394
greenyellow	GO:0006874	cellular calcium ion homeostasis	161	3	0.94	3.19149	0.06808	0.328394
greenyellow	GO:0071496	cellular response to external stimulus	161	3	0.94	3.19149	0.06808	0.328394
greenyellow	GO:0046890	regulation of lipid biosynthetic process	74	2	0.43	4.65116	0.06961	0.335079
greenyellow	GO:0051494	negative regulation of cytoskeleton orga...	74	2	0.43	4.65116	0.06961	0.335079
greenyellow	GO:0043122	regulation of I-kappaB kinase/NF-kappaB ...	163	3	0.95	3.15789	0.0701	0.337338
greenyellow	GO:1901605	alpha-amino acid metabolic process	165	3	0.97	3.09278	0.07215	0.344352
greenyellow	GO:0051262	protein tetramerization	76	2	0.44	4.54545	0.07291	0.347776
greenyellow	GO:0001759	organ induction	13	1	0.08	12.5	0.0735	0.34875
greenyellow	GO:0002090	regulation of receptor internalization	13	1	0.08	12.5	0.0735	0.34875
greenyellow	GO:0006706	steroid catabolic process	13	1	0.08	12.5	0.0735	0.34875
greenyellow	GO:0009068	aspartate family amino acid catabolic pr...	13	1	0.08	12.5	0.0735	0.34875
greenyellow	GO:0010866	regulation of triglyceride biosynthetic ...	13	1	0.08	12.5	0.0735	0.34875
greenyellow	GO:0016180	snRNA processing	13	1	0.08	12.5	0.0735	0.34875
greenyellow	GO:0032483	regulation of Rab protein signal transdu...	13	1	0.08	12.5	0.0735	0.34875
greenyellow	GO:0032735	positive regulation of interleukin-12 pr...	13	1	0.08	12.5	0.0735	0.34875
greenyellow	GO:0032801	receptor catabolic process	13	1	0.08	12.5	0.0735	0.34875
greenyellow	GO:0033599	regulation of mammary gland epithelial c...	13	1	0.08	12.5	0.0735	0.34875
greenyellow	GO:0042430	indole-containing compound metabolic pro...	13	1	0.08	12.5	0.0735	0.34875
greenyellow	GO:0042537	benzene-containing compound metabolic pr...	13	1	0.08	12.5	0.0735	0.34875
greenyellow	GO:0042744	hydrogen peroxide catabolic process	13	1	0.08	12.5	0.0735	0.34875
greenyellow	GO:0070229	negative regulation of lymphocyte apopto...	13	1	0.08	12.5	0.0735	0.34875
greenyellow	GO:0070232	regulation of T cell apoptotic process	13	1	0.08	12.5	0.0735	0.34875
greenyellow	GO:2000811	negative regulation of anoikis	13	1	0.08	12.5	0.0735	0.34875
greenyellow	GO:0055065	metal ion homeostasis	271	4	1.59	2.51572	0.07391	0.350593
greenyellow	GO:0006641	triglyceride metabolic process	77	2	0.45	4.44444	0.07458	0.353668
greenyellow	GO:0006816	calcium ion transport	168	3	0.98	3.06122	0.07526	0.356789
greenyellow	GO:1901701	cellular response to oxygen-containing c...	507	6	2.97	2.0202	0.07532	0.356866
greenyellow	GO:0051017	actin filament bundle assembly	78	2	0.46	4.34783	0.07627	0.360632
greenyellow	GO:0061572	actin filament bundle organization	78	2	0.46	4.34783	0.07627	0.360632
greenyellow	GO:0072503	cellular divalent inorganic cation homeo...	171	3	1	3	0.07844	0.370462
greenyellow	GO:0001919	regulation of receptor recycling	14	1	0.08	12.5	0.07892	0.371113
greenyellow	GO:0007520	myoblast fusion	14	1	0.08	12.5	0.07892	0.371113
greenyellow	GO:0016073	snRNA metabolic process	14	1	0.08	12.5	0.07892	0.371113
greenyellow	GO:0018345	protein palmitoylation	14	1	0.08	12.5	0.07892	0.371113
greenyellow	GO:0032456	endocytic recycling	14	1	0.08	12.5	0.07892	0.371113
greenyellow	GO:0032482	Rab protein signal transduction	14	1	0.08	12.5	0.07892	0.371113
greenyellow	GO:0032486	Rap protein signal transduction	14	1	0.08	12.5	0.07892	0.371113
greenyellow	GO:0034367	macromolecular complex remodeling	14	1	0.08	12.5	0.07892	0.371113
greenyellow	GO:0034368	protein-lipid complex remodeling	14	1	0.08	12.5	0.07892	0.371113
greenyellow	GO:0034369	plasma lipoprotein particle remodeling	14	1	0.08	12.5	0.07892	0.371113
greenyellow	GO:0042026	protein refolding	14	1	0.08	12.5	0.07892	0.371113
greenyellow	GO:0042092	type 2 immune response	14	1	0.08	12.5	0.07892	0.371113
greenyellow	GO:0042094	interleukin-2 biosynthetic process	14	1	0.08	12.5	0.07892	0.371113
greenyellow	GO:0043984	histone H4-K16 acetylation	14	1	0.08	12.5	0.07892	0.371113
greenyellow	GO:0045061	thymic T cell selection	14	1	0.08	12.5	0.07892	0.371113
greenyellow	GO:0044281	small molecule metabolic process	2053	17	12.01	1.41549	0.07932	0.372718
greenyellow	GO:0032869	cellular response to insulin stimulus	172	3	1.01	2.9703	0.07951	0.373456
greenyellow	GO:0042098	T cell proliferation	80	2	0.47	4.25532	0.07967	0.3741
greenyellow	GO:0006639	acylglycerol metabolic process	81	2	0.47	4.25532	0.08138	0.381799
greenyellow	GO:0016042	lipid catabolic process	174	3	1.02	2.94118	0.08167	0.383049
greenyellow	GO:0006638	neutral lipid metabolic process	82	2	0.48	4.16667	0.08311	0.388872
greenyellow	GO:0070838	divalent metal ion transport	176	3	1.03	2.91262	0.08386	0.391515
greenyellow	GO:0000768	syncytium formation by plasma membrane f...	15	1	0.09	11.1111	0.08432	0.392312
greenyellow	GO:0006044	N-acetylglucosamine metabolic process	15	1	0.09	11.1111	0.08432	0.392312
greenyellow	GO:0006775	fat-soluble vitamin metabolic process	15	1	0.09	11.1111	0.08432	0.392312
greenyellow	GO:0008045	motor neuron axon guidance	15	1	0.09	11.1111	0.08432	0.392312
greenyellow	GO:0016572	histone phosphorylation	15	1	0.09	11.1111	0.08432	0.392312
greenyellow	GO:0032653	regulation of interleukin-10 production	15	1	0.09	11.1111	0.08432	0.392312
greenyellow	GO:0033280	response to vitamin D	15	1	0.09	11.1111	0.08432	0.392312
greenyellow	GO:0035066	positive regulation of histone acetylati...	15	1	0.09	11.1111	0.08432	0.392312
greenyellow	GO:0045577	regulation of B cell differentiation	15	1	0.09	11.1111	0.08432	0.392312
greenyellow	GO:0051353	positive regulation of oxidoreductase ac...	15	1	0.09	11.1111	0.08432	0.392312
greenyellow	GO:0071391	cellular response to estrogen stimulus	15	1	0.09	11.1111	0.08432	0.392312
greenyellow	GO:0009267	cellular response to starvation	83	2	0.49	4.08163	0.08486	0.394599
greenyellow	GO:0043112	receptor metabolic process	83	2	0.49	4.08163	0.08486	0.394599
greenyellow	GO:0072511	divalent inorganic cation transport	178	3	1.04	2.88462	0.08607	0.399769
greenyellow	GO:0043436	oxoacid metabolic process	785	8	4.59	1.74292	0.0862	0.400258
greenyellow	GO:0051092	positive regulation of NF-kappaB transcr...	84	2	0.49	4.08163	0.08661	0.402047
greenyellow	GO:0007249	I-kappaB kinase/NF-kappaB cascade	179	3	1.05	2.85714	0.08719	0.404163
greenyellow	GO:0008202	steroid metabolic process	179	3	1.05	2.85714	0.08719	0.404163
greenyellow	GO:0060627	regulation of vesicle-mediated transport	179	3	1.05	2.85714	0.08719	0.404163
greenyellow	GO:0006082	organic acid metabolic process	791	8	4.63	1.72786	0.08917	0.412202
greenyellow	GO:0016477	cell migration	659	7	3.86	1.81347	0.08925	0.412202
greenyellow	GO:0050896	response to stimulus	4976	35	29.12	1.20192	0.08942	0.412269
greenyellow	GO:0009950	dorsal/ventral axis specification	16	1	0.09	11.1111	0.08969	0.413046
greenyellow	GO:0046006	regulation of activated T cell prolifera...	16	1	0.09	11.1111	0.08969	0.413046
greenyellow	GO:1901985	positive regulation of protein acetylati...	16	1	0.09	11.1111	0.08969	0.413046
greenyellow	GO:2000758	positive regulation of peptidyl-lysine a...	16	1	0.09	11.1111	0.08969	0.413046
greenyellow	GO:0050670	regulation of lymphocyte proliferation	87	2	0.51	3.92157	0.09193	0.422883
greenyellow	GO:0043933	macromolecular complex subunit organizat...	1214	11	7.1	1.5493	0.09293	0.427242
greenyellow	GO:0032944	regulation of mononuclear cell prolifera...	88	2	0.51	3.92157	0.09373	0.430312
greenyellow	GO:0043393	regulation of protein binding	88	2	0.51	3.92157	0.09373	0.430312
greenyellow	GO:0006699	bile acid biosynthetic process	17	1	0.1	10	0.09502	0.435375
greenyellow	GO:0006949	syncytium formation	17	1	0.1	10	0.09502	0.435375
greenyellow	GO:0007026	negative regulation of microtubule depol...	17	1	0.1	10	0.09502	0.435375
greenyellow	GO:0008209	androgen metabolic process	17	1	0.1	10	0.09502	0.435375
greenyellow	GO:0032613	interleukin-10 production	17	1	0.1	10	0.09502	0.435375
greenyellow	GO:0090207	regulation of triglyceride metabolic pro...	17	1	0.1	10	0.09502	0.435375
greenyellow	GO:2000209	regulation of anoikis	17	1	0.1	10	0.09502	0.435375
greenyellow	GO:0031329	regulation of cellular catabolic process	417	5	2.44	2.04918	0.0965	0.440915
black	GO:0032501	multicellular organismal process	4078	145	96.19	1.50743	4.2e-10	2.56974e-08
black	GO:0044707	single-multicellular organism process	3962	142	93.45	1.51953	4.5e-10	2.72258e-08
black	GO:0051239	regulation of multicellular organismal p...	1412	67	33.3	2.01201	8.6e-09	4.31991e-07
black	GO:0070887	cellular response to chemical stimulus	1452	68	34.25	1.9854	1.1e-08	5.40861e-07
black	GO:0016055	Wnt receptor signaling pathway	268	24	6.32	3.79747	1.9e-08	8.75992e-07
black	GO:0048513	organ development	1783	76	42.05	1.80737	6.8e-08	2.92005e-06
black	GO:0007166	cell surface receptor signaling pathway	1793	76	42.29	1.79712	8.7e-08	3.70661e-06
black	GO:0009888	tissue development	1037	52	24.46	2.12592	1.1e-07	4.57864e-06
black	GO:0009719	response to endogenous stimulus	877	46	20.69	2.2233	1.9e-07	7.75e-06
black	GO:0060070	canonical Wnt receptor signaling pathway	159	17	3.75	4.53333	2e-07	8.1375e-06
black	GO:0003008	system process	1157	55	27.29	2.01539	2.6e-07	1.03968e-05
black	GO:0035637	multicellular organismal signaling	580	35	13.68	2.55848	2.7e-07	1.07702e-05
black	GO:0019226	transmission of nerve impulse	558	34	13.16	2.58359	3.2e-07	1.27024e-05
black	GO:0051969	regulation of transmission of nerve impu...	146	16	3.44	4.65116	3.3e-07	1.30675e-05
black	GO:0071310	cellular response to organic substance	1199	56	28.28	1.9802	3.5e-07	1.37924e-05
black	GO:0048731	system development	2617	97	61.73	1.57136	5.2e-07	1.98197e-05
black	GO:0010646	regulation of cell communication	1748	72	41.23	1.7463	6.8e-07	2.56775e-05
black	GO:0031644	regulation of neurological system proces...	155	16	3.66	4.37158	7.4e-07	2.76862e-05
black	GO:0044699	single-organism process	8160	225	192.47	1.16901	7.4e-07	2.76862e-05
black	GO:0010033	response to organic substance	1588	67	37.46	1.78857	8.1e-07	3.00976e-05
black	GO:0007275	multicellular organismal development	3024	107	71.33	1.50007	9.8e-07	3.60848e-05
black	GO:0007154	cell communication	3761	126	88.71	1.42036	1e-06	3.67381e-05
black	GO:0051050	positive regulation of transport	358	25	8.44	2.96209	1.2e-06	4.38876e-05
black	GO:0023051	regulation of signaling	1745	71	41.16	1.72498	1.3e-06	4.74383e-05
black	GO:0030111	regulation of Wnt receptor signaling pat...	164	16	3.87	4.13437	1.6e-06	5.73568e-05
black	GO:0023052	signaling	3672	123	86.61	1.42016	1.6e-06	5.73568e-05
black	GO:0044700	single organism signaling	3672	123	86.61	1.42016	1.6e-06	5.73568e-05
black	GO:0071495	cellular response to endogenous stimulus	629	35	14.84	2.35849	1.8e-06	6.42434e-05
black	GO:0072001	renal system development	187	17	4.41	3.85488	2e-06	7.10699e-05
black	GO:0032502	developmental process	3426	116	80.81	1.43547	2.5e-06	8.73122e-05
black	GO:0048856	anatomical structure development	3053	106	72.01	1.47202	3e-06	0.000103883
black	GO:0001655	urogenital system development	214	18	5.05	3.56436	3e-06	0.000103883
black	GO:0033555	multicellular organismal response to str...	40	8	0.94	8.51064	3.4e-06	0.000116987
black	GO:0044057	regulation of system process	333	23	7.85	2.92994	3.9e-06	0.000133066
black	GO:2000026	regulation of multicellular organismal d...	867	42	20.45	2.05379	5.5e-06	0.000185711
black	GO:0042221	response to chemical stimulus	2170	81	51.18	1.58265	6e-06	0.00020134
black	GO:0007267	cell-cell signaling	754	38	17.78	2.13723	6.6e-06	0.000219214
black	GO:0042127	regulation of cell proliferation	881	42	20.78	2.02117	8.2e-06	0.000262191
black	GO:0051716	cellular response to stimulus	4034	129	95.15	1.35575	1e-05	0.000311782
black	GO:0007165	signal transduction	3285	110	77.48	1.41972	1e-05	0.000311782
black	GO:0007268	synaptic transmission	484	28	11.42	2.45184	1e-05	0.000311782
black	GO:0042391	regulation of membrane potential	234	18	5.52	3.26087	1.1e-05	0.000339063
black	GO:0001822	kidney development	150	14	3.54	3.9548	1.2e-05	0.000368491
black	GO:0050804	regulation of synaptic transmission	133	13	3.14	4.14013	1.5e-05	0.000452922
black	GO:0060828	regulation of canonical Wnt receptor sig...	114	12	2.69	4.46097	1.5e-05	0.000452922
black	GO:0000122	negative regulation of transcription fro...	416	25	9.81	2.54842	1.7e-05	0.000507661
black	GO:0032879	regulation of localization	1131	49	26.68	1.83658	1.8e-05	0.000535558
black	GO:0007517	muscle organ development	292	20	6.89	2.90276	1.9e-05	0.000561207
black	GO:0050877	neurological system process	829	39	19.55	1.99488	2.4e-05	0.000698748
black	GO:0023056	positive regulation of signaling	687	34	16.2	2.09877	3.1e-05	0.000882037
black	GO:0048583	regulation of response to stimulus	1979	73	46.68	1.56384	3.2e-05	0.000908901
black	GO:0010647	positive regulation of cell communicatio...	690	34	16.27	2.08974	3.4e-05	0.000962348
black	GO:0007519	skeletal muscle tissue development	166	14	3.92	3.57143	3.8e-05	0.00106813
black	GO:0006816	calcium ion transport	168	14	3.96	3.53535	4.3e-05	0.00119833
black	GO:0050896	response to stimulus	4976	149	117.37	1.26949	4.8e-05	0.00131737
black	GO:0060538	skeletal muscle organ development	171	14	4.03	3.47395	5.2e-05	0.0014105
black	GO:0009887	organ morphogenesis	532	28	12.55	2.23108	5.7e-05	0.00152829
black	GO:0001568	blood vessel development	395	23	9.32	2.46781	6e-05	0.00159559
black	GO:0009967	positive regulation of signal transducti...	655	32	15.45	2.0712	6.9e-05	0.00179389
black	GO:0001667	ameboidal cell migration	176	14	4.15	3.37349	7.1e-05	0.00183417
black	GO:0070838	divalent metal ion transport	176	14	4.15	3.37349	7.1e-05	0.00183417
black	GO:0007417	central nervous system development	541	28	12.76	2.19436	7.6e-05	0.00194176
black	GO:0016477	cell migration	659	32	15.54	2.0592	7.8e-05	0.00198973
black	GO:0071363	cellular response to growth factor stimu...	514	27	12.12	2.22772	8e-05	0.00203438
black	GO:0072511	divalent inorganic cation transport	178	14	4.2	3.33333	8.1e-05	0.00205659
black	GO:0009653	anatomical structure morphogenesis	1612	61	38.02	1.60442	8.7e-05	0.00217835
black	GO:0050793	regulation of developmental process	1143	47	26.96	1.74332	0.0001	0.00246218
black	GO:0070848	response to growth factor stimulus	523	27	12.34	2.18801	0.00011	0.00263272
black	GO:0060537	muscle tissue development	279	18	6.58	2.73556	0.00011	0.00263272
black	GO:0007270	neuron-neuron synaptic transmission	63	8	1.49	5.36913	0.00011	0.00263272
black	GO:0030177	positive regulation of Wnt receptor sign...	63	8	1.49	5.36913	0.00011	0.00263272
black	GO:0048519	negative regulation of biological proces...	2609	88	61.54	1.42996	0.00011	0.00263272
black	GO:0044767	single-organism developmental process	2723	91	64.23	1.41678	0.00011	0.00263272
black	GO:0001944	vasculature development	414	23	9.76	2.35656	0.00012	0.00285944
black	GO:0008285	negative regulation of cell proliferatio...	416	23	9.81	2.34455	0.00013	0.00308869
black	GO:0060284	regulation of cell development	417	23	9.84	2.3374	0.00014	0.00328788
black	GO:0051049	regulation of transport	803	36	18.94	1.90074	0.00014	0.00328788
black	GO:0010631	epithelial cell migration	122	11	2.88	3.81944	0.00014	0.00328788
black	GO:0090132	epithelium migration	122	11	2.88	3.81944	0.00014	0.00328788
black	GO:0006928	cellular component movement	1128	46	26.61	1.72867	0.00015	0.00349749
black	GO:0018108	peptidyl-tyrosine phosphorylation	144	12	3.4	3.52941	0.00015	0.00349749
black	GO:0051960	regulation of nervous system development	367	21	8.66	2.42494	0.00016	0.00369886
black	GO:0090130	tissue migration	124	11	2.92	3.76712	0.00016	0.00369886
black	GO:0015837	amine transport	23	5	0.54	9.25926	0.00017	0.003875
black	GO:0048640	negative regulation of developmental gro...	23	5	0.54	9.25926	0.00017	0.003875
black	GO:0051952	regulation of amine transport	23	5	0.54	9.25926	0.00017	0.003875
black	GO:0072358	cardiovascular system development	627	30	14.79	2.0284	0.00017	0.003875
black	GO:0072359	circulatory system development	627	30	14.79	2.0284	0.00017	0.003875
black	GO:0018212	peptidyl-tyrosine modification	146	12	3.44	3.48837	0.00017	0.003875
black	GO:0035249	synaptic transmission, glutamatergic	36	6	0.85	7.05882	0.00017	0.003875
black	GO:0072006	nephron development	68	8	1.6	5	0.00019	0.00427697
black	GO:0008283	cell proliferation	1174	47	27.69	1.69736	0.00019	0.00427697
black	GO:0007420	brain development	400	22	9.43	2.33298	0.0002	0.00447115
black	GO:0055123	digestive system development	87	9	2.05	4.39024	0.0002	0.00447115
black	GO:0014706	striated muscle tissue development	268	17	6.32	2.68987	0.00021	0.00465
black	GO:0000165	MAPK cascade	434	23	10.24	2.24609	0.00024	0.00522193
black	GO:0048523	negative regulation of cellular process	2401	81	56.63	1.43034	0.00024	0.00522193
black	GO:0048584	positive regulation of response to stimu...	923	39	21.77	1.79146	0.00024	0.00522193
black	GO:0007178	transmembrane receptor protein serine/th...	223	15	5.26	2.85171	0.00026	0.00561207
black	GO:0008284	positive regulation of cell proliferatio...	465	24	10.97	2.18778	0.00026	0.00561207
black	GO:0045664	regulation of neuron differentiation	274	17	6.46	2.63158	0.00027	0.00578953
black	GO:0050767	regulation of neurogenesis	327	19	7.71	2.46433	0.00027	0.00578953
black	GO:0040011	locomotion	962	40	22.69	1.76289	0.00028	0.00594909
black	GO:0071396	cellular response to lipid	155	12	3.66	3.27869	0.0003	0.00627571
black	GO:0048870	cell motility	710	32	16.75	1.91045	0.0003	0.00627571
black	GO:0051674	localization of cell	710	32	16.75	1.91045	0.0003	0.00627571
black	GO:0022414	reproductive process	683	31	16.11	1.92427	0.00034	0.00696038
black	GO:0050794	regulation of cellular process	6184	173	145.86	1.18607	0.00035	0.00712031
black	GO:0051241	negative regulation of multicellular org...	230	15	5.42	2.76753	0.00036	0.00727826
black	GO:0032835	glomerulus development	41	6	0.97	6.18557	0.00037	0.00742509
black	GO:0007155	cell adhesion	720	32	16.98	1.88457	0.00039	0.00769364
black	GO:0045595	regulation of cell differentiation	815	35	19.22	1.82102	0.00039	0.00769364
black	GO:0009966	regulation of signal transduction	1559	57	36.77	1.55018	0.00039	0.00769364
black	GO:0051172	negative regulation of nitrogen compound...	784	34	18.49	1.83883	0.0004	0.00781513
black	GO:0022610	biological adhesion	722	32	17.03	1.87904	0.00041	0.00797222
black	GO:0065007	biological regulation	6867	188	161.97	1.16071	0.00041	0.00797222
black	GO:0050789	regulation of biological process	6464	179	152.46	1.17408	0.00041	0.00797222
black	GO:0060429	epithelium development	570	27	13.44	2.00893	0.00043	0.00829177
black	GO:0061061	muscle structure development	395	21	9.32	2.25322	0.00043	0.00829177
black	GO:0048468	cell development	1226	47	28.92	1.62517	0.00051	0.0096179
black	GO:0031327	negative regulation of cellular biosynth...	830	35	19.58	1.78754	0.00054	0.0100211
black	GO:1901700	response to oxygen-containing compound	767	33	18.09	1.82421	0.00056	0.01031
black	GO:0032412	regulation of ion transmembrane transpor...	80	8	1.89	4.2328	0.00058	0.0106181
black	GO:0007399	nervous system development	1410	52	33.26	1.56344	0.00061	0.0110431
black	GO:0070371	ERK1 and ERK2 cascade	101	9	2.38	3.78151	0.00062	0.0111992
black	GO:0045934	negative regulation of nucleobase-contai...	772	33	18.21	1.81219	0.00063	0.0112921
black	GO:0000904	cell morphogenesis involved in different...	585	27	13.8	1.95652	0.00064	0.0114462
black	GO:0033993	response to lipid	379	20	8.94	2.23714	0.00065	0.0115741
black	GO:0022898	regulation of transmembrane transporter ...	82	8	1.93	4.14508	0.00068	0.0120033
black	GO:0048565	digestive tract development	82	8	1.93	4.14508	0.00068	0.0120033
black	GO:0009725	response to hormone stimulus	497	24	11.72	2.04778	0.00069	0.012101
black	GO:0009890	negative regulation of biosynthetic proc...	841	35	19.84	1.76411	0.00069	0.012101
black	GO:0034405	response to fluid shear stress	18	4	0.42	9.52381	0.00071	0.0124117
black	GO:0046677	response to antibiotic	31	5	0.73	6.84932	0.00072	0.0124792
black	GO:0060341	regulation of cellular localization	560	26	13.21	1.96821	0.00074	0.0126242
black	GO:0002009	morphogenesis of an epithelium	300	17	7.08	2.40113	0.00075	0.0127281
black	GO:0010975	regulation of neuron projection developm...	196	13	4.62	2.81385	0.00076	0.0128576
black	GO:0007167	enzyme linked receptor protein signaling...	752	32	17.74	1.80383	0.00082	0.0137724
black	GO:0015844	monoamine transport	32	5	0.75	6.66667	0.00084	0.0140504
black	GO:0071560	cellular response to transforming growth...	174	12	4.1	2.92683	0.00085	0.0141885
black	GO:0001975	response to amphetamine	19	4	0.45	8.88889	0.00089	0.0147203
black	GO:0017158	regulation of calcium ion-dependent exoc...	19	4	0.45	8.88889	0.00089	0.0147203
black	GO:0042596	fear response	19	4	0.45	8.88889	0.00089	0.0147203
black	GO:0071559	response to transforming growth factor b...	175	12	4.13	2.90557	0.0009	0.0148706
black	GO:1901701	cellular response to oxygen-containing c...	507	24	11.96	2.00669	0.00091	0.0150205
black	GO:0030154	cell differentiation	2051	69	48.38	1.42621	0.00092	0.0151549
black	GO:0019228	regulation of action potential in neuron	86	8	2.03	3.94089	0.00093	0.0152732
black	GO:0034765	regulation of ion transmembrane transpor...	107	9	2.52	3.57143	0.00094	0.0153599
black	GO:0045785	positive regulation of cell adhesion	107	9	2.52	3.57143	0.00094	0.0153599
black	GO:0031279	regulation of cyclase activity	33	5	0.78	6.41026	0.00097	0.0157239
black	GO:0048518	positive regulation of biological proces...	2813	89	66.35	1.34137	0.00097	0.0157239
black	GO:0048638	regulation of developmental growth	87	8	2.05	3.90244	0.00101	0.0161789
black	GO:0007179	transforming growth factor beta receptor...	154	11	3.63	3.0303	0.00104	0.016465
black	GO:0003012	muscle system process	229	14	5.4	2.59259	0.00106	0.0166842
black	GO:0048589	developmental growth	205	13	4.84	2.68595	0.00114	0.0176364
black	GO:0015850	organic hydroxy compound transport	89	8	2.1	3.80952	0.00117	0.0179639
black	GO:0051253	negative regulation of RNA metabolic pro...	704	30	16.6	1.80723	0.00117	0.0179639
black	GO:0045892	negative regulation of transcription, DN...	673	29	15.87	1.82735	0.0012	0.0183208
black	GO:0042475	odontogenesis of dentin-containing tooth	51	6	1.2	5	0.0012	0.0183208
black	GO:0001525	angiogenesis	286	16	6.75	2.37037	0.00123	0.0186563
black	GO:0034220	ion transmembrane transport	286	16	6.75	2.37037	0.00123	0.0186563
black	GO:0044763	single-organism cellular process	7522	200	177.42	1.12727	0.00125	0.0189068
black	GO:0032409	regulation of transporter activity	90	8	2.12	3.77358	0.00126	0.0190227
black	GO:0048729	tissue morphogenesis	371	19	8.75	2.17143	0.00126	0.0190227
black	GO:0051339	regulation of lyase activity	35	5	0.83	6.0241	0.00128	0.0192177
black	GO:0051094	positive regulation of developmental pro...	520	24	12.27	1.95599	0.00128	0.0192177
black	GO:0043269	regulation of ion transport	208	13	4.91	2.64766	0.00131	0.0195599
black	GO:0034762	regulation of transmembrane transport	113	9	2.67	3.37079	0.00139	0.0206219
black	GO:0048514	blood vessel morphogenesis	347	18	8.18	2.20049	0.00146	0.0214261
black	GO:0001657	ureteric bud development	72	7	1.7	4.11765	0.00149	0.0217292
black	GO:0090090	negative regulation of canonical Wnt rec...	72	7	1.7	4.11765	0.00149	0.0217292
black	GO:0006874	cellular calcium ion homeostasis	161	11	3.8	2.89474	0.0015	0.0218359
black	GO:0050678	regulation of epithelial cell proliferat...	162	11	3.82	2.87958	0.00158	0.0228168
black	GO:0042060	wound healing	467	22	11.01	1.99818	0.00158	0.0228168
black	GO:0017156	calcium ion-dependent exocytosis	37	5	0.87	5.74713	0.00165	0.0236597
black	GO:0051924	regulation of calcium ion transport	94	8	2.22	3.6036	0.00167	0.0238833
black	GO:0007610	behavior	380	19	8.96	2.12054	0.00167	0.0238833
black	GO:0035556	intracellular signal transduction	1691	58	39.88	1.45436	0.00169	0.0240636
black	GO:0032844	regulation of homeostatic process	189	12	4.46	2.69058	0.00174	0.0246034
black	GO:0042552	myelination	74	7	1.75	4	0.00175	0.0246805
black	GO:0030900	forebrain development	215	13	5.07	2.5641	0.00176	0.0248
black	GO:1901020	negative regulation of calcium ion trans...	11	3	0.26	11.5385	0.00186	0.0258731
black	GO:0007611	learning or memory	118	9	2.78	3.23741	0.00188	0.0261067
black	GO:0051937	catecholamine transport	23	4	0.54	7.40741	0.00188	0.0261067
black	GO:0048585	negative regulation of response to stimu...	694	29	16.37	1.77153	0.00191	0.0264555
black	GO:0001656	metanephros development	56	6	1.32	4.54545	0.00197	0.0270792
black	GO:0030334	regulation of cell migration	328	17	7.74	2.19638	0.00199	0.027308
black	GO:0065008	regulation of biological quality	2225	72	52.48	1.37195	0.00204	0.0278298
black	GO:0071229	cellular response to acid	39	5	0.92	5.43478	0.0021	0.0284812
black	GO:0010243	response to organonitrogen compound	478	22	11.27	1.95209	0.00211	0.0285455
black	GO:0032870	cellular response to hormone stimulus	302	16	7.12	2.24719	0.00215	0.0289663
black	GO:0010634	positive regulation of epithelial cell m...	57	6	1.34	4.47761	0.00215	0.0289663
black	GO:0030808	regulation of nucleotide biosynthetic pr...	57	6	1.34	4.47761	0.00215	0.0289663
black	GO:1900371	regulation of purine nucleotide biosynth...	57	6	1.34	4.47761	0.00215	0.0289663
black	GO:0008015	blood circulation	247	14	5.83	2.40137	0.00217	0.0291874
black	GO:0055074	calcium ion homeostasis	169	11	3.99	2.75689	0.0022	0.0294207
black	GO:0007272	ensheathment of neurons	77	7	1.82	3.84615	0.00221	0.0294335
black	GO:0008366	axon ensheathment	77	7	1.82	3.84615	0.00221	0.0294335
black	GO:0048741	skeletal muscle fiber development	77	7	1.82	3.84615	0.00221	0.0294335
black	GO:0031128	developmental induction	24	4	0.57	7.01754	0.00222	0.0294702
pink	GO:0006006	glucose metabolic process	175	23	2	11.5	2.2e-18	6.88558e-16
pink	GO:0006096	glycolysis	48	15	0.55	27.2727	2.5e-18	7.53472e-16
pink	GO:0005996	monosaccharide metabolic process	226	25	2.58	9.68992	4.5e-18	1.28487e-15
pink	GO:0019318	hexose metabolic process	208	24	2.38	10.084	8.3e-18	2.28953e-15
pink	GO:0019320	hexose catabolic process	73	16	0.83	19.2771	9.9e-17	2.26933e-14
pink	GO:0006007	glucose catabolic process	61	15	0.7	21.4286	1.4e-16	3.07905e-14
pink	GO:0046365	monosaccharide catabolic process	78	16	0.89	17.9775	3.1e-16	6.30656e-14
pink	GO:0044724	single-organism carbohydrate catabolic p...	106	16	1.21	13.2231	5e-14	6.61585e-12
pink	GO:0016052	carbohydrate catabolic process	108	16	1.23	13.0081	6.8e-14	8.925e-12
pink	GO:0044723	single-organism carbohydrate metabolic p...	472	28	5.4	5.18519	3.8e-13	4.123e-11
pink	GO:0006094	gluconeogenesis	49	11	0.56	19.6429	5.7e-12	5.12528e-10
pink	GO:0019319	hexose biosynthetic process	53	11	0.61	18.0328	1.4e-11	1.11146e-09
pink	GO:0046364	monosaccharide biosynthetic process	58	11	0.66	16.6667	4.1e-11	2.96567e-09
pink	GO:0044281	small molecule metabolic process	2053	55	23.47	2.34342	7.7e-11	5.35545e-09
pink	GO:0005975	carbohydrate metabolic process	642	29	7.34	3.95095	1.1e-10	7.5538e-09
pink	GO:0006520	cellular amino acid metabolic process	368	22	4.21	5.22565	1.5e-10	9.96429e-09
pink	GO:0016051	carbohydrate biosynthetic process	134	14	1.53	9.15033	3.4e-10	2.12011e-08
pink	GO:0034976	response to endoplasmic reticulum stress	111	13	1.27	10.2362	3.6e-10	2.21932e-08
pink	GO:0019752	carboxylic acid metabolic process	685	29	7.83	3.7037	5.2e-10	3.08869e-08
pink	GO:0044710	single-organism metabolic process	2453	58	28.05	2.06774	2.6e-09	1.43441e-07
pink	GO:0006091	generation of precursor metabolites and ...	338	19	3.86	4.92228	8.6e-09	4.31991e-07
pink	GO:0043436	oxoacid metabolic process	785	29	8.98	3.2294	1.2e-08	5.84731e-07
pink	GO:0006082	organic acid metabolic process	791	29	9.04	3.20796	1.4e-08	6.70147e-07
pink	GO:1901605	alpha-amino acid metabolic process	165	13	1.89	6.87831	4.7e-08	2.06179e-06
pink	GO:0006418	tRNA aminoacylation for protein translat...	47	8	0.54	14.8148	5.1e-08	2.22527e-06
pink	GO:0009070	serine family amino acid biosynthetic pr...	11	5	0.13	38.4615	7.9e-08	3.37461e-06
pink	GO:0006984	ER-nucleus signaling pathway	93	10	1.06	9.43396	9.7e-08	4.11113e-06
pink	GO:0043038	amino acid activation	51	8	0.58	13.7931	9.9e-08	4.16337e-06
pink	GO:0043039	tRNA aminoacylation	51	8	0.58	13.7931	9.9e-08	4.16337e-06
pink	GO:0015804	neutral amino acid transport	12	5	0.14	35.7143	1.3e-07	5.3428e-06
pink	GO:1901607	alpha-amino acid biosynthetic process	57	8	0.65	12.3077	2.4e-07	9.74065e-06
pink	GO:0035966	response to topologically incorrect prot...	132	11	1.51	7.28477	3e-07	1.19377e-05
pink	GO:0030968	endoplasmic reticulum unfolded protein r...	82	9	0.94	9.57447	3.6e-07	1.41181e-05
pink	GO:0034620	cellular response to unfolded protein	83	9	0.95	9.47368	4e-07	1.55e-05
pink	GO:0008652	cellular amino acid biosynthetic process	85	9	0.97	9.27835	5e-07	1.91471e-05
pink	GO:0035967	cellular response to topologically incor...	88	9	1.01	8.91089	6.7e-07	2.53587e-05
pink	GO:0006986	response to unfolded protein	125	10	1.43	6.99301	1.6e-06	5.73568e-05
pink	GO:0009069	serine family amino acid metabolic proce...	25	5	0.29	17.2414	8e-06	0.000256805
pink	GO:0006399	tRNA metabolic process	122	9	1.39	6.47482	1e-05	0.000311782
pink	GO:0009628	response to abiotic stimulus	649	20	7.42	2.69542	4.4e-05	0.00122201
pink	GO:0016053	organic acid biosynthetic process	223	11	2.55	4.31373	4.8e-05	0.00131737
pink	GO:0046394	carboxylic acid biosynthetic process	223	11	2.55	4.31373	4.8e-05	0.00131737
pink	GO:1901564	organonitrogen compound metabolic proces...	1377	32	15.74	2.03304	5.5e-05	0.00147955
pink	GO:0070059	intrinsic apoptotic signaling pathway in...	19	4	0.22	18.1818	5.5e-05	0.00147955
pink	GO:0006865	amino acid transport	90	7	1.03	6.79612	7.4e-05	0.00190261
pink	GO:0044262	cellular carbohydrate metabolic process	170	9	1.94	4.63918	0.00014	0.00328788
pink	GO:0010033	response to organic substance	1588	34	18.16	1.87225	0.00016	0.00369886
pink	GO:0006090	pyruvate metabolic process	25	4	0.29	13.7931	0.00017	0.003875
pink	GO:0036294	cellular response to decreased oxygen le...	73	6	0.83	7.22892	0.00018	0.00408008
pink	GO:0071456	cellular response to hypoxia	73	6	0.83	7.22892	0.00018	0.00408008
pink	GO:0006730	one-carbon metabolic process	27	4	0.31	12.9032	0.00023	0.00503802
pink	GO:0001666	response to hypoxia	183	9	2.09	4.30622	0.00025	0.00541057
pink	GO:0051289	protein homotetramerization	50	5	0.57	8.77193	0.00025	0.00541057
pink	GO:0036293	response to decreased oxygen levels	185	9	2.12	4.24528	0.00027	0.00578953
pink	GO:0071453	cellular response to oxygen levels	79	6	0.9	6.66667	0.00028	0.00594909
pink	GO:0015849	organic acid transport	148	8	1.69	4.73373	0.00029	0.00611367
pink	GO:0046942	carboxylic acid transport	148	8	1.69	4.73373	0.00029	0.00611367
pink	GO:0006820	anion transport	232	10	2.65	3.77358	0.00032	0.00661753
pink	GO:0051193	regulation of cofactor metabolic process	13	3	0.15	20	0.00038	0.00755128
pink	GO:0051196	regulation of coenzyme metabolic process	13	3	0.15	20	0.00038	0.00755128
pink	GO:0070482	response to oxygen levels	195	9	2.23	4.03587	0.00039	0.00769364
pink	GO:1901700	response to oxygen-containing compound	767	20	8.77	2.2805	0.00042	0.00812782
pink	GO:0006950	response to stress	2322	43	26.55	1.61959	0.00045	0.0086365
pink	GO:0044283	small molecule biosynthetic process	340	12	3.89	3.08483	0.00051	0.0096179
pink	GO:0015711	organic anion transport	205	9	2.34	3.84615	0.00056	0.01031
pink	GO:0044711	single-organism biosynthetic process	344	12	3.93	3.05344	0.00057	0.0104704
pink	GO:0006987	activation of signaling protein activity...	61	5	0.7	7.14286	0.00064	0.0114462
pink	GO:0006732	coenzyme metabolic process	170	8	1.94	4.12371	0.00073	0.0125722
pink	GO:0046653	tetrahydrofolate metabolic process	16	3	0.18	16.6667	0.00073	0.0125722
pink	GO:0050873	brown fat cell differentiation	16	3	0.18	16.6667	0.00073	0.0125722
pink	GO:0051186	cofactor metabolic process	213	9	2.44	3.68852	0.00074	0.0126242
pink	GO:0032075	positive regulation of nuclease activity	63	5	0.72	6.94444	0.00075	0.0127281
pink	GO:0032069	regulation of nuclease activity	67	5	0.77	6.49351	0.00099	0.0159527
pink	GO:0006575	cellular modified amino acid metabolic p...	147	7	1.68	4.16667	0.00147	0.0214953
pink	GO:0019725	cellular homeostasis	390	12	4.46	2.69058	0.00167	0.0238833
pink	GO:0050878	regulation of body fluid levels	444	13	5.08	2.55906	0.00168	0.0239422
pink	GO:0012501	programmed cell death	1248	26	14.27	1.822	0.00168	0.0239422
pink	GO:0042221	response to chemical stimulus	2170	39	24.81	1.57195	0.00168	0.0239422
pink	GO:0051262	protein tetramerization	76	5	0.87	5.74713	0.00174	0.0246034
pink	GO:0006760	folic acid-containing compound metabolic...	22	3	0.25	12	0.00192	0.0265489
pink	GO:1901698	response to nitrogen compound	511	14	5.84	2.39726	0.00208	0.0282807
pink	GO:0006081	cellular aldehyde metabolic process	23	3	0.26	11.5385	0.00219	0.0294078
pink	GO:0007618	mating	23	3	0.26	11.5385	0.00219	0.0294078
pink	GO:0019217	regulation of fatty acid metabolic proce...	49	4	0.56	7.14286	0.00232	0.0304992
pink	GO:0006874	cellular calcium ion homeostasis	161	7	1.84	3.80435	0.00246	0.031927
pink	GO:0006915	apoptotic process	1236	25	14.13	1.76929	0.00312	0.0382653
pink	GO:0008217	regulation of blood pressure	87	5	0.99	5.05051	0.00316	0.0385525
pink	GO:0010243	response to organonitrogen compound	478	13	5.47	2.3766	0.00319	0.0388312
pink	GO:0055074	calcium ion homeostasis	169	7	1.93	3.62694	0.00323	0.0390262
pink	GO:0034637	cellular carbohydrate biosynthetic proce...	54	4	0.62	6.45161	0.00331	0.0396105
pink	GO:0055082	cellular chemical homeostasis	316	10	3.61	2.77008	0.00334	0.0398815
pink	GO:0070887	cellular response to chemical stimulus	1452	28	16.6	1.68675	0.00341	0.0405389
pink	GO:0072503	cellular divalent inorganic cation homeo...	171	7	1.96	3.57143	0.00345	0.0409546
pink	GO:0097193	intrinsic apoptotic signaling pathway	173	7	1.98	3.53535	0.00368	0.0431499
pink	GO:1901575	organic substance catabolic process	1602	30	18.32	1.63755	0.00369	0.043236
pink	GO:0032787	monocarboxylic acid metabolic process	321	10	3.67	2.7248	0.00373	0.0436105
pink	GO:0042558	pteridine-containing compound metabolic ...	28	3	0.32	9.375	0.00388	0.0450407
pink	GO:0008219	cell death	1400	27	16.01	1.68645	0.00407	0.0466474
pink	GO:0016265	death	1403	27	16.04	1.68329	0.00419	0.0476869
pink	GO:0018208	peptidyl-proline modification	29	3	0.33	9.09091	0.00429	0.0486888
pink	GO:0071310	cellular response to organic substance	1199	24	13.71	1.75055	0.00436	0.0494143
pink	GO:0007589	body fluid secretion	59	4	0.67	5.97015	0.00457	0.0511884
pink	GO:0072507	divalent inorganic cation homeostasis	180	7	2.06	3.39806	0.00457	0.0511884
pink	GO:0009719	response to endogenous stimulus	877	19	10.03	1.89432	0.00499	0.0550965
pink	GO:0009066	aspartate family amino acid metabolic pr...	31	3	0.35	8.57143	0.00519	0.0567656
pink	GO:0070613	regulation of protein processing	31	3	0.35	8.57143	0.00519	0.0567656
pink	GO:1901566	organonitrogen compound biosynthetic pro...	509	13	5.82	2.23368	0.00541	0.0586985
pink	GO:0034660	ncRNA metabolic process	289	9	3.3	2.72727	0.00588	0.0625471
pink	GO:0006086	acetyl-CoA biosynthetic process from pyr...	11	2	0.13	15.3846	0.00667	0.0688359
pink	GO:0010510	regulation of acetyl-CoA biosynthetic pr...	11	2	0.13	15.3846	0.00667	0.0688359
pink	GO:0045922	negative regulation of fatty acid metabo...	11	2	0.13	15.3846	0.00667	0.0688359
pink	GO:0044237	cellular metabolic process	7133	95	81.55	1.16493	0.00688	0.0703342
pink	GO:0044238	primary metabolic process	7135	95	81.58	1.1645	0.00696	0.0707079
pink	GO:0005978	glycogen biosynthetic process	35	3	0.4	7.5	0.00732	0.0737209
pink	GO:0009250	glucan biosynthetic process	35	3	0.4	7.5	0.00732	0.0737209
pink	GO:0071704	organic substance metabolic process	7336	97	83.87	1.15655	0.0074	0.0744345
pink	GO:0050896	response to stimulus	4976	71	56.89	1.24802	0.00745	0.0748449
pink	GO:0050886	endocrine process	36	3	0.41	7.31707	0.00791	0.0783538
pink	GO:0006544	glycine metabolic process	12	2	0.14	14.2857	0.00794	0.0784599
pink	GO:0043649	dicarboxylic acid catabolic process	12	2	0.14	14.2857	0.00794	0.0784599
pink	GO:0050812	regulation of acyl-CoA biosynthetic proc...	12	2	0.14	14.2857	0.00794	0.0784599
pink	GO:0048878	chemical homeostasis	481	12	5.5	2.18182	0.00892	0.0857438
pink	GO:0042311	vasodilation	38	3	0.43	6.97674	0.0092	0.0878106
pink	GO:0010906	regulation of glucose metabolic process	72	4	0.82	4.87805	0.00921	0.0878106
pink	GO:0006098	pentose-phosphate shunt	13	2	0.15	13.3333	0.00932	0.0884965
pink	GO:0007620	copulation	13	2	0.15	13.3333	0.00932	0.0884965
pink	GO:0033554	cellular response to stress	1139	22	13.02	1.68971	0.00962	0.09071
pink	GO:0008152	metabolic process	7671	100	87.7	1.14025	0.00965	0.0909402
pink	GO:0000097	sulfur amino acid biosynthetic process	14	2	0.16	12.5	0.01079	0.097922
pink	GO:0006085	acetyl-CoA biosynthetic process	14	2	0.16	12.5	0.01079	0.097922
pink	GO:0006103	2-oxoglutarate metabolic process	14	2	0.16	12.5	0.01079	0.097922
pink	GO:0006740	NADPH regeneration	14	2	0.16	12.5	0.01079	0.097922
pink	GO:0009067	aspartate family amino acid biosynthetic...	14	2	0.16	12.5	0.01079	0.097922
pink	GO:0042149	cellular response to glucose starvation	14	2	0.16	12.5	0.01079	0.097922
pink	GO:0044060	regulation of endocrine process	14	2	0.16	12.5	0.01079	0.097922
pink	GO:0006873	cellular ion homeostasis	264	8	3.02	2.64901	0.0108	0.097922
pink	GO:0071705	nitrogen compound transport	434	11	4.96	2.21774	0.01088	0.0985924
pink	GO:0006796	phosphate-containing compound metabolic ...	2031	34	23.22	1.46425	0.01121	0.100464
pink	GO:0009725	response to hormone stimulus	497	12	5.68	2.11268	0.01138	0.101207
pink	GO:0033993	response to lipid	379	10	4.33	2.30947	0.01153	0.102262
pink	GO:0060986	endocrine hormone secretion	15	2	0.17	11.7647	0.01235	0.107312
pink	GO:0050900	leukocyte migration	168	6	1.92	3.125	0.01259	0.108759
pink	GO:0051188	cofactor biosynthetic process	123	5	1.41	3.5461	0.01336	0.113483
pink	GO:0055085	transmembrane transport	571	13	6.53	1.99081	0.0135	0.11434
pink	GO:0006198	cAMP catabolic process	16	2	0.18	11.1111	0.01402	0.117435
pink	GO:0032504	multicellular organism reproduction	452	11	5.17	2.12766	0.01439	0.118581
pink	GO:0048519	negative regulation of biological proces...	2609	41	29.83	1.37446	0.01444	0.118752
pink	GO:0006793	phosphorus metabolic process	2068	34	23.64	1.43824	0.01461	0.119969
pink	GO:0006412	translation	455	11	5.2	2.11538	0.01505	0.122838
pink	GO:0009987	cellular process	10175	123	116.33	1.05734	0.01505	0.122838
pink	GO:0045776	negative regulation of blood pressure	17	2	0.19	10.5263	0.01577	0.126245
pink	GO:0048265	response to pain	17	2	0.19	10.5263	0.01577	0.126245
pink	GO:0010675	regulation of cellular carbohydrate meta...	85	4	0.97	4.12371	0.0162	0.128897
pink	GO:0050801	ion homeostasis	341	9	3.9	2.30769	0.01623	0.128913
pink	GO:0009056	catabolic process	1787	30	20.43	1.46843	0.01707	0.133883
pink	GO:0033692	cellular polysaccharide biosynthetic pro...	48	3	0.55	5.45455	0.01737	0.134837
pink	GO:0072524	pyridine-containing compound metabolic p...	48	3	0.55	5.45455	0.01737	0.134837
pink	GO:0009063	cellular amino acid catabolic process	87	4	0.99	4.0404	0.0175	0.135367
pink	GO:0006110	regulation of glycolysis	18	2	0.21	9.52381	0.01761	0.135895
pink	GO:0009214	cyclic nucleotide catabolic process	18	2	0.21	9.52381	0.01761	0.135895
pink	GO:0014070	response to organic cyclic compound	405	10	4.63	2.15983	0.01762	0.135908
pink	GO:0044703	multi-organism reproductive process	132	5	1.51	3.31126	0.01764	0.135998
pink	GO:0006875	cellular metal ion homeostasis	235	7	2.69	2.60223	0.0182	0.138803
pink	GO:0006109	regulation of carbohydrate metabolic pro...	89	4	1.02	3.92157	0.01887	0.141786
pink	GO:0008645	hexose transport	89	4	1.02	3.92157	0.01887	0.141786
pink	GO:0015758	glucose transport	89	4	1.02	3.92157	0.01887	0.141786
pink	GO:0009064	glutamine family amino acid metabolic pr...	50	3	0.57	5.26316	0.01936	0.144005
pink	GO:0002376	immune system process	1360	24	15.55	1.54341	0.01941	0.144311
pink	GO:0042304	regulation of fatty acid biosynthetic pr...	19	2	0.22	9.09091	0.01953	0.144478
pink	GO:0051491	positive regulation of filopodium assemb...	19	2	0.22	9.09091	0.01953	0.144478
pink	GO:0097190	apoptotic signaling pathway	352	9	4.02	2.23881	0.01953	0.144478
pink	GO:0015749	monosaccharide transport	90	4	1.03	3.8835	0.01958	0.144716
pink	GO:0009058	biosynthetic process	4307	61	49.24	1.23883	0.02043	0.148902
pink	GO:0042592	homeostatic process	804	16	9.19	1.74102	0.02078	0.150912
pink	GO:0006541	glutamine metabolic process	20	2	0.23	8.69565	0.02154	0.153218
pink	GO:0030800	negative regulation of cyclic nucleotide...	20	2	0.23	8.69565	0.02154	0.153218
pink	GO:0030815	negative regulation of cAMP metabolic pr...	20	2	0.23	8.69565	0.02154	0.153218
pink	GO:0048536	spleen development	20	2	0.23	8.69565	0.02154	0.153218
pink	GO:0090200	positive regulation of release of cytoch...	20	2	0.23	8.69565	0.02154	0.153218
pink	GO:0070997	neuron death	140	5	1.6	3.125	0.02214	0.155919
pink	GO:0000271	polysaccharide biosynthetic process	53	3	0.61	4.91803	0.02258	0.158401
pink	GO:0032941	secretion by tissue	53	3	0.61	4.91803	0.02258	0.158401
pink	GO:1901576	organic substance biosynthetic process	4251	60	48.6	1.23457	0.02361	0.162269
pink	GO:0002526	acute inflammatory response	54	3	0.62	4.83871	0.02371	0.16275
pink	GO:0009108	coenzyme biosynthetic process	96	4	1.1	3.63636	0.02417	0.165211
pink	GO:0005977	glycogen metabolic process	55	3	0.63	4.7619	0.02487	0.168565
pink	GO:0006073	cellular glucan metabolic process	55	3	0.63	4.7619	0.02487	0.168565
pink	GO:0044042	glucan metabolic process	55	3	0.63	4.7619	0.02487	0.168565
pink	GO:0043066	negative regulation of apoptotic process	492	11	5.63	1.95382	0.02521	0.169823
pink	GO:0019637	organophosphate metabolic process	963	18	11.01	1.63488	0.02552	0.171203
pink	GO:0015698	inorganic anion transport	22	2	0.25	8	0.0258	0.172155
pink	GO:0055081	anion homeostasis	22	2	0.25	8	0.0258	0.172155
pink	GO:1900543	negative regulation of purine nucleotide...	22	2	0.25	8	0.0258	0.172155
pink	GO:0043069	negative regulation of programmed cell d...	497	11	5.68	1.93662	0.0269	0.176663
pink	GO:0009612	response to mechanical stimulus	100	4	1.14	3.50877	0.02756	0.179272
pink	GO:0030003	cellular cation homeostasis	257	7	2.94	2.38095	0.02801	0.181315
pink	GO:0007204	elevation of cytosolic calcium ion conce...	102	4	1.17	3.4188	0.02936	0.186435
pink	GO:0006084	acetyl-CoA metabolic process	24	2	0.27	7.40741	0.03038	0.19024
pink	GO:0006739	NADP metabolic process	24	2	0.27	7.40741	0.03038	0.19024
[truncated: 2,001 more rows]

## Sheet: AS - IS
module	GO.ID	Term	Annotated	Significant	Expected	fold_enrichment	classic	BH
brown	GO:0006396	RNA processing	633	103	57.21	1.80038	1.5e-09	2.08654e-07
brown	GO:0002479	antigen processing and presentation of e...	66	21	5.97	3.51759	1.7e-07	1.25761e-05
brown	GO:0042590	antigen processing and presentation of e...	67	21	6.06	3.46535	2.2e-07	1.57731e-05
brown	GO:0042254	ribosome biogenesis	151	34	13.65	2.49084	4.3e-07	2.69163e-05
brown	GO:0006397	mRNA processing	390	65	35.25	1.84397	7.7e-07	4.57363e-05
brown	GO:0016071	mRNA metabolic process	594	89	53.69	1.65766	9.5e-07	5.3872e-05
brown	GO:0022613	ribonucleoprotein complex biogenesis	251	47	22.69	2.0714	1e-06	5.57363e-05
brown	GO:0006521	regulation of cellular amino acid metabo...	52	17	4.7	3.61702	1.6e-06	8.45455e-05
brown	GO:0051437	positive regulation of ubiquitin-protein...	70	20	6.33	3.15956	2.2e-06	0.000113307
brown	GO:0034660	ncRNA metabolic process	289	51	26.12	1.95253	2.2e-06	0.000113307
brown	GO:0051443	positive regulation of ubiquitin-protein...	78	21	7.05	2.97872	3.6e-06	0.000173858
brown	GO:0006259	DNA metabolic process	764	105	69.05	1.52064	6e-06	0.000269751
brown	GO:0031145	anaphase-promoting complex-dependent pro...	81	21	7.32	2.86885	6.8e-06	0.000303205
brown	GO:0051351	positive regulation of ligase activity	81	21	7.32	2.86885	6.8e-06	0.000303205
brown	GO:0051439	regulation of ubiquitin-protein ligase a...	76	20	6.87	2.91121	8.8e-06	0.000375906
brown	GO:0051325	interphase	225	41	20.34	2.01573	9.9e-06	0.000410985
brown	GO:0000082	G1/S transition of mitotic cell cycle	197	37	17.81	2.07748	1.3e-05	0.000516037
brown	GO:0051329	interphase of mitotic cell cycle	221	40	19.98	2.002	1.5e-05	0.000582637
brown	GO:0002474	antigen processing and presentation of p...	85	21	7.68	2.73438	1.5e-05	0.000582637
brown	GO:0008380	RNA splicing	317	52	28.65	1.81501	1.6e-05	0.000618527
brown	GO:0044774	mitotic DNA integrity checkpoint	79	20	7.14	2.80112	1.7e-05	0.000651
brown	GO:0022403	cell cycle phase	247	43	22.33	1.92566	2e-05	0.00075
brown	GO:0016072	rRNA metabolic process	113	25	10.21	2.44858	2e-05	0.00075
brown	GO:0009308	amine metabolic process	157	31	14.19	2.18464	2.4e-05	0.00088371
brown	GO:0033238	regulation of cellular amine metabolic p...	69	18	6.24	2.88462	2.8e-05	0.00101492
brown	GO:0000375	RNA splicing, via transesterification re...	212	38	19.16	1.9833	3e-05	0.00107781
brown	GO:0002703	regulation of leukocyte mediated immunit...	65	17	5.88	2.89116	4.5e-05	0.00157839
brown	GO:0051438	regulation of ubiquitin-protein ligase a...	91	21	8.23	2.55164	4.6e-05	0.00160655
brown	GO:0035036	sperm-egg recognition	22	9	1.99	4.52261	6.5e-05	0.00221313
brown	GO:0030330	DNA damage response, signal transduction...	100	22	9.04	2.43363	6.7e-05	0.002267
brown	GO:0006364	rRNA processing	107	23	9.67	2.37849	6.7e-05	0.002267
brown	GO:0051436	negative regulation of ubiquitin-protein...	67	17	6.06	2.80528	6.8e-05	0.0022913
brown	GO:0051340	regulation of ligase activity	94	21	8.5	2.47059	7.7e-05	0.00257325
brown	GO:0000377	RNA splicing, via transesterification re...	207	36	18.71	1.9241	9.3e-05	0.00303931
brown	GO:0000398	mRNA splicing, via spliceosome	207	36	18.71	1.9241	9.3e-05	0.00303931
brown	GO:0006977	DNA damage response, signal transduction...	63	16	5.69	2.81195	0.00011	0.00353107
brown	GO:0072413	signal transduction involved in mitotic ...	63	16	5.69	2.81195	0.00011	0.00353107
brown	GO:0072431	signal transduction involved in mitotic ...	63	16	5.69	2.81195	0.00011	0.00353107
brown	GO:0044773	mitotic DNA damage checkpoint	76	18	6.87	2.62009	0.00011	0.00353107
brown	GO:0031571	mitotic G1 DNA damage checkpoint	70	17	6.33	2.68562	0.00012	0.00380702
brown	GO:0044783	G1 DNA damage checkpoint	70	17	6.33	2.68562	0.00012	0.00380702
brown	GO:0007339	binding of sperm to zona pellucida	19	8	1.72	4.65116	0.00013	0.00406094
brown	GO:0072401	signal transduction involved in DNA inte...	64	16	5.78	2.76817	0.00013	0.00406094
brown	GO:0072422	signal transduction involved in DNA dama...	64	16	5.78	2.76817	0.00013	0.00406094
brown	GO:0031397	negative regulation of protein ubiquitin...	98	21	8.86	2.3702	0.00014	0.00434828
brown	GO:0051352	negative regulation of ligase activity	71	17	6.42	2.64798	0.00015	0.00461484
brown	GO:0051444	negative regulation of ubiquitin-protein...	71	17	6.42	2.64798	0.00015	0.00461484
brown	GO:0034470	ncRNA processing	204	35	18.44	1.89805	0.00015	0.00461484
brown	GO:0072395	signal transduction involved in cell cyc...	65	16	5.88	2.72109	0.00016	0.0048764
brown	GO:0044106	cellular amine metabolic process	151	28	13.65	2.05128	0.00018	0.00536538
brown	GO:0007093	mitotic cell cycle checkpoint	136	26	12.29	2.11554	0.00018	0.00536538
brown	GO:0006260	DNA replication	247	40	22.33	1.79131	0.00019	0.00561207
brown	GO:0002449	lymphocyte mediated immunity	100	21	9.04	2.32301	0.00019	0.00561207
brown	GO:0009988	cell-cell recognition	25	9	2.26	3.9823	0.00021	0.006125
brown	GO:0042770	signal transduction in response to DNA d...	110	22	9.94	2.21328	0.00029	0.00826576
brown	GO:0002706	regulation of lymphocyte mediated immuni...	49	13	4.43	2.93454	0.0003	0.00846187
brown	GO:0006520	cellular amino acid metabolic process	368	53	33.26	1.59351	0.00042	0.0113171
brown	GO:1901991	negative regulation of mitotic cell cycl...	151	27	13.65	1.97802	0.00043	0.0115483
brown	GO:0072331	signal transduction by p53 class mediato...	128	24	11.57	2.07433	0.00043	0.0115483
brown	GO:2000134	negative regulation of G1/S transition o...	85	18	7.68	2.34375	0.00049	0.012925
brown	GO:0002443	leukocyte mediated immunity	130	24	11.75	2.04255	0.00055	0.0141634
brown	GO:0071156	regulation of cell cycle arrest	86	18	7.77	2.3166	0.00057	0.0145404
brown	GO:0031570	DNA integrity checkpoint	134	24	12.11	1.98183	0.00086	0.0203438
brown	GO:0044772	mitotic cell cycle phase transition	373	52	33.71	1.54257	0.00102	0.0232175
brown	GO:0002460	adaptive immune response based on somati...	105	20	9.49	2.10748	0.00103	0.02325
brown	GO:2000045	regulation of G1/S transition of mitotic...	105	20	9.49	2.10748	0.00103	0.02325
brown	GO:0090305	nucleic acid phosphodiester bond hydroly...	62	14	5.6	2.5	0.00104	0.0234432
brown	GO:0071158	positive regulation of cell cycle arrest	76	16	6.87	2.32897	0.00106	0.0237952
brown	GO:0006308	DNA catabolic process	63	14	5.69	2.46046	0.00123	0.0268701
brown	GO:0010565	regulation of cellular ketone metabolic ...	130	23	11.75	1.95745	0.00129	0.0278076
brown	GO:0002699	positive regulation of immune effector p...	64	14	5.78	2.42215	0.00145	0.0308078
brown	GO:0002312	B cell activation involved in immune res...	32	9	2.89	3.11419	0.00161	0.0338537
brown	GO:0042180	cellular ketone metabolic process	165	27	14.91	1.81087	0.00173	0.0356854
brown	GO:0002822	regulation of adaptive immune response b...	52	12	4.7	2.55319	0.00191	0.0387114
brown	GO:0034661	ncRNA catabolic process	16	6	1.45	4.13793	0.00194	0.0391245
brown	GO:1901990	regulation of mitotic cell cycle phase t...	184	29	16.63	1.74384	0.00215	0.0418556
brown	GO:0031398	positive regulation of protein ubiquitin...	127	22	11.48	1.91638	0.00215	0.0418556
brown	GO:0016064	immunoglobulin mediated immune response	53	12	4.79	2.50522	0.00228	0.0437583
brown	GO:0000077	DNA damage checkpoint	128	22	11.57	1.90147	0.00238	0.045463
brown	GO:0019724	B cell mediated immunity	54	12	4.88	2.45902	0.00269	0.0501486
brown	GO:0019752	carboxylic acid metabolic process	685	83	61.91	1.34066	0.00315	0.0568993
brown	GO:0071103	DNA conformation change	148	24	13.38	1.79372	0.00342	0.0604349
brown	GO:0002708	positive regulation of lymphocyte mediat...	30	8	2.71	2.95203	0.00417	0.0698937
brown	GO:0002200	somatic diversification of immune recept...	43	10	3.89	2.57069	0.00421	0.0701308
brown	GO:0000737	DNA catabolic process, endonucleolytic	24	7	2.17	3.22581	0.00423	0.07032
brown	GO:0043632	modification-dependent macromolecule cat...	391	51	35.34	1.44312	0.00466	0.0759174
brown	GO:0002285	lymphocyte activation involved in immune...	58	12	5.24	2.29008	0.005	0.0796233
brown	GO:0002250	adaptive immune response	120	20	10.85	1.84332	0.00525	0.0823951
brown	GO:0001910	regulation of leukocyte mediated cytotox...	25	7	2.26	3.09735	0.00542	0.0845738
brown	GO:0007005	mitochondrion organization	258	36	23.32	1.54374	0.00565	0.0873255
brown	GO:0006261	DNA-dependent DNA replication	97	17	8.77	1.93843	0.00579	0.0891507
brown	GO:0006323	DNA packaging	113	19	10.21	1.86092	0.00582	0.0894433
brown	GO:0007050	cell cycle arrest	197	29	17.81	1.6283	0.00586	0.0898883
brown	GO:0043161	proteasomal ubiquitin-dependent protein ...	232	33	20.97	1.57368	0.00587	0.0899569
brown	GO:0006399	tRNA metabolic process	122	20	11.03	1.81324	0.00633	0.095478
brown	GO:0002705	positive regulation of leukocyte mediate...	32	8	2.89	2.76817	0.00638	0.0957883
brown	GO:0002819	regulation of adaptive immune response	60	12	5.42	2.21402	0.00664	0.0981526
brown	GO:0002204	somatic recombination of immunoglobulin ...	26	7	2.35	2.97872	0.00685	0.100221
brown	GO:0002208	somatic diversification of immunoglobuli...	26	7	2.35	2.97872	0.00685	0.100221
brown	GO:0031341	regulation of cell killing	26	7	2.35	2.97872	0.00685	0.100221
brown	GO:0045190	isotype switching	26	7	2.35	2.97872	0.00685	0.100221
brown	GO:0002562	somatic diversification of immune recept...	39	9	3.53	2.54958	0.00686	0.100221
brown	GO:0016444	somatic cell DNA recombination	39	9	3.53	2.54958	0.00686	0.100221
brown	GO:0002455	humoral immune response mediated by circ...	20	6	1.81	3.31492	0.00688	0.100423
brown	GO:0006479	protein methylation	91	16	8.23	1.94411	0.00708	0.101971
brown	GO:0008213	protein alkylation	91	16	8.23	1.94411	0.00708	0.101971
brown	GO:0044265	cellular macromolecule catabolic process	690	81	62.37	1.2987	0.00795	0.111829
brown	GO:0015813	L-glutamate transport	15	5	1.36	3.67647	0.0083	0.115258
brown	GO:0031396	regulation of protein ubiquitination	176	26	15.91	1.63419	0.00839	0.116013
brown	GO:0000380	alternative mRNA splicing, via spliceoso...	21	6	1.9	3.15789	0.0089	0.121926
brown	GO:0001912	positive regulation of leukocyte mediate...	21	6	1.9	3.15789	0.0089	0.121926
brown	GO:0000076	DNA replication checkpoint	10	4	0.9	4.44444	0.00893	0.122097
brown	GO:0000075	cell cycle checkpoint	212	30	19.16	1.56576	0.00898	0.122403
brown	GO:0044770	cell cycle phase transition	436	54	39.41	1.37021	0.01034	0.135276
brown	GO:0003009	skeletal muscle contraction	16	5	1.45	3.44828	0.0112	0.142295
brown	GO:0010257	NADH dehydrogenase complex assembly	16	5	1.45	3.44828	0.0112	0.142295
brown	GO:0015800	acidic amino acid transport	16	5	1.45	3.44828	0.0112	0.142295
brown	GO:0032981	mitochondrial respiratory chain complex ...	16	5	1.45	3.44828	0.0112	0.142295
brown	GO:0097031	mitochondrial respiratory chain complex ...	16	5	1.45	3.44828	0.0112	0.142295
brown	GO:0006298	mismatch repair	22	6	1.99	3.01508	0.01133	0.143499
brown	GO:0031343	positive regulation of cell killing	22	6	1.99	3.01508	0.01133	0.143499
brown	GO:0000278	mitotic cell cycle	771	88	69.69	1.26273	0.01192	0.14843
brown	GO:0006082	organic acid metabolic process	791	90	71.49	1.25892	0.01197	0.148733
brown	GO:0002381	immunoglobulin production involved in im...	29	7	2.62	2.67176	0.01282	0.154782
brown	GO:0010498	proteasomal protein catabolic process	245	33	22.14	1.49051	0.01301	0.156611
brown	GO:0009219	pyrimidine deoxyribonucleotide metabolic...	11	4	0.99	4.0404	0.01305	0.15686
brown	GO:0016445	somatic diversification of immunoglobuli...	36	8	3.25	2.46154	0.01331	0.15858
brown	GO:0043436	oxoacid metabolic process	785	89	70.95	1.2544	0.01356	0.160384
brown	GO:1901988	negative regulation of cell cycle phase ...	228	31	20.61	1.50412	0.01388	0.162867
brown	GO:0001895	retina homeostasis	23	6	2.08	2.88462	0.01418	0.165431
brown	GO:0006309	apoptotic DNA fragmentation	23	6	2.08	2.88462	0.01418	0.165431
brown	GO:0034728	nucleosome organization	90	15	8.13	1.84502	0.01445	0.167619
brown	GO:0019941	modification-dependent protein catabolic...	387	48	34.98	1.37221	0.01466	0.169209
brown	GO:0010948	negative regulation of cell cycle proces...	257	34	23.23	1.46362	0.01526	0.174776
brown	GO:0006805	xenobiotic metabolic process	83	14	7.5	1.86667	0.01609	0.180224
brown	GO:0071466	cellular response to xenobiotic stimulus	83	14	7.5	1.86667	0.01609	0.180224
brown	GO:0050953	sensory perception of light stimulus	108	17	9.76	1.7418	0.01657	0.183689
brown	GO:0006511	ubiquitin-dependent protein catabolic pr...	382	47	34.53	1.36114	0.01784	0.193693
brown	GO:0002456	T cell mediated immunity	38	8	3.43	2.33236	0.01833	0.197825
brown	GO:0050885	neuromuscular process controlling balanc...	38	8	3.43	2.33236	0.01833	0.197825
brown	GO:0009066	aspartate family amino acid metabolic pr...	31	7	2.8	2.5	0.01844	0.198617
brown	GO:0000726	non-recombinational repair	18	5	1.63	3.06748	0.01888	0.201887
brown	GO:0002712	regulation of B cell mediated immunity	18	5	1.63	3.06748	0.01888	0.201887
brown	GO:0002889	regulation of immunoglobulin mediated im...	18	5	1.63	3.06748	0.01888	0.201887
brown	GO:0072525	pyridine-containing compound biosyntheti...	18	5	1.63	3.06748	0.01888	0.201887
brown	GO:0008037	cell recognition	61	11	5.51	1.99637	0.01953	0.206934
brown	GO:0009410	response to xenobiotic stimulus	85	14	7.68	1.82292	0.01955	0.206982
brown	GO:0015672	monovalent inorganic cation transport	198	27	17.9	1.50838	0.01996	0.210258
brown	GO:0000245	spliceosomal complex assembly	39	8	3.53	2.26629	0.02129	0.219439
brown	GO:0051004	regulation of lipoprotein lipase activit...	25	6	2.26	2.65487	0.02131	0.219471
brown	GO:0002263	cell activation involved in immune respo...	86	14	7.77	1.8018	0.02148	0.220699
brown	GO:0002366	leukocyte activation involved in immune ...	86	14	7.77	1.8018	0.02148	0.220699
brown	GO:0016447	somatic recombination of immunoglobulin ...	32	7	2.89	2.42215	0.02182	0.223487
brown	GO:0002478	antigen processing and presentation of e...	146	21	13.2	1.59091	0.02193	0.223768
brown	GO:0006974	response to DNA damage stimulus	612	70	55.32	1.26537	0.0224	0.226999
brown	GO:0006418	tRNA aminoacylation for protein translat...	47	9	4.25	2.11765	0.02305	0.231853
brown	GO:0007338	single fertilization	47	9	4.25	2.11765	0.02305	0.231853
brown	GO:0000959	mitochondrial RNA metabolic process	19	5	1.72	2.90698	0.02376	0.237673
brown	GO:0042537	benzene-containing compound metabolic pr...	13	4	1.18	3.38983	0.02444	0.242833
brown	GO:0045191	regulation of isotype switching	13	4	1.18	3.38983	0.02444	0.242833
brown	GO:0019884	antigen processing and presentation of e...	148	21	13.38	1.56951	0.02514	0.247372
brown	GO:0072524	pyridine-containing compound metabolic p...	48	9	4.34	2.07373	0.02617	0.255346
brown	GO:0032259	methylation	149	21	13.47	1.55902	0.02686	0.260206
brown	GO:0000209	protein polyubiquitination	167	23	15.09	1.52419	0.02709	0.2615
brown	GO:0007346	regulation of mitotic cell cycle	278	35	25.13	1.39276	0.02759	0.265069
brown	GO:0007616	long-term memory	20	5	1.81	2.76243	0.02939	0.277288
brown	GO:0015807	L-amino acid transport	20	5	1.81	2.76243	0.02939	0.277288
brown	GO:0045494	photoreceptor cell maintenance	20	5	1.81	2.76243	0.02939	0.277288
brown	GO:0009163	nucleoside biosynthetic process	98	15	8.86	1.693	0.02945	0.277693
brown	GO:0006354	DNA-dependent transcription, elongation	107	16	9.67	1.6546	0.03049	0.282943
brown	GO:0006270	DNA replication initiation	27	6	2.44	2.45902	0.03053	0.282943
brown	GO:0031124	mRNA 3'-end processing	90	14	8.13	1.72202	0.03064	0.282943
brown	GO:0051276	chromosome organization	643	72	58.12	1.23882	0.03169	0.290021
brown	GO:0009067	aspartate family amino acid biosynthetic...	14	4	1.27	3.14961	0.03182	0.290021
brown	GO:0051603	proteolysis involved in cellular protein...	406	48	36.7	1.3079	0.03186	0.290021
brown	GO:1901659	glycosyl compound biosynthetic process	99	15	8.95	1.67598	0.03192	0.290222
brown	GO:0045333	cellular respiration	143	20	12.93	1.54679	0.03249	0.292464
brown	GO:0008033	tRNA processing	74	12	6.69	1.79372	0.03264	0.293542
brown	GO:0051053	negative regulation of DNA metabolic pro...	58	10	5.24	1.9084	0.03358	0.299789
brown	GO:0006812	cation transport	447	52	40.4	1.28713	0.03419	0.304067
brown	GO:0051339	regulation of lyase activity	35	7	3.16	2.21519	0.03446	0.306133
brown	GO:0006941	striated muscle contraction	83	13	7.5	1.73333	0.03463	0.307308
brown	GO:0000083	regulation of transcription involved in ...	21	5	1.9	2.63158	0.03579	0.315026
brown	GO:0051349	positive regulation of lyase activity	21	5	1.9	2.63158	0.03579	0.315026
brown	GO:0002709	regulation of T cell mediated immunity	28	6	2.53	2.37154	0.03599	0.315251
brown	GO:0043486	histone exchange	28	6	2.53	2.37154	0.03599	0.315251
brown	GO:0019362	pyridine nucleotide metabolic process	43	8	3.89	2.05656	0.0365	0.317601
brown	GO:0046496	nicotinamide nucleotide metabolic proces...	43	8	3.89	2.05656	0.0365	0.317601
brown	GO:0006403	RNA localization	136	19	12.29	1.54597	0.03682	0.318748
brown	GO:0007600	sensory perception	256	32	23.14	1.38289	0.03706	0.320144
brown	GO:0043038	amino acid activation	51	9	4.61	1.95228	0.03731	0.321281
brown	GO:0043039	tRNA aminoacylation	51	9	4.61	1.95228	0.03731	0.321281
brown	GO:0031497	chromatin assembly	84	13	7.59	1.71278	0.03772	0.323954
brown	GO:1901987	regulation of cell cycle phase transitio...	257	32	23.23	1.37753	0.03881	0.328968
brown	GO:0006213	pyrimidine nucleoside metabolic process	36	7	3.25	2.15385	0.03956	0.332047
brown	GO:0001916	positive regulation of T cell mediated c...	15	4	1.36	2.94118	0.04037	0.336328
brown	GO:0010881	regulation of cardiac muscle contraction...	15	4	1.36	2.94118	0.04037	0.336328
brown	GO:0019359	nicotinamide nucleotide biosynthetic pro...	15	4	1.36	2.94118	0.04037	0.336328
brown	GO:0019363	pyridine nucleotide biosynthetic process	15	4	1.36	2.94118	0.04037	0.336328
brown	GO:0002440	production of molecular mediator of immu...	68	11	6.15	1.78862	0.04038	0.336328
yellow	GO:0000278	mitotic cell cycle	771	89	56.5	1.57522	8.5e-06	0.000364046
yellow	GO:0006999	nuclear pore organization	10	6	0.73	8.21918	2.5e-05	0.000916385
yellow	GO:0051297	centrosome organization	61	14	4.47	3.13199	0.0001	0.00324203
yellow	GO:0007098	centrosome cycle	42	11	3.08	3.57143	0.00016	0.0048764
yellow	GO:0006281	DNA repair	393	49	28.8	1.70139	0.00016	0.0048764
yellow	GO:0051298	centrosome duplication	30	9	2.2	4.09091	0.0002	0.00587545
yellow	GO:0031023	microtubule organizing center organizati...	65	14	4.76	2.94118	0.00021	0.006125
yellow	GO:0000018	regulation of DNA recombination	40	10	2.93	3.41297	0.00047	0.0124581
yellow	GO:0006260	DNA replication	247	33	18.1	1.8232	0.00055	0.0141634
yellow	GO:0007049	cell cycle	1321	127	96.8	1.31198	0.00062	0.0155958
yellow	GO:0006974	response to DNA damage stimulus	612	66	44.85	1.47157	0.00087	0.0204613
yellow	GO:0022402	cell cycle process	1011	100	74.09	1.34971	0.00098	0.0225914
yellow	GO:0006302	double-strand break repair	119	19	8.72	2.1789	0.001	0.0228581
yellow	GO:0007077	mitotic nuclear envelope disassembly	37	9	2.71	3.32103	0.00112	0.0248
yellow	GO:0006996	organelle organization	2102	188	154.04	1.22046	0.00116	0.025616
yellow	GO:0002224	toll-like receptor signaling pathway	114	18	8.35	2.15569	0.00153	0.0323386
yellow	GO:0007099	centriole replication	13	5	0.95	5.26316	0.00163	0.034098
yellow	GO:0010569	regulation of double-strand break repair...	13	5	0.95	5.26316	0.00163	0.034098
yellow	GO:0045910	negative regulation of DNA recombination	13	5	0.95	5.26316	0.00163	0.034098
yellow	GO:0030397	membrane disassembly	39	9	2.86	3.14685	0.00167	0.0347117
yellow	GO:0051081	nuclear envelope disassembly	39	9	2.86	3.14685	0.00167	0.0347117
yellow	GO:0051052	regulation of DNA metabolic process	184	25	13.48	1.8546	0.00196	0.0393815
yellow	GO:0000724	double-strand break repair via homologou...	58	11	4.25	2.58824	0.00289	0.053267
yellow	GO:0000725	recombinational repair	59	11	4.32	2.5463	0.00332	0.0592467
yellow	GO:0006259	DNA metabolic process	764	76	55.99	1.35739	0.00344	0.0607223
yellow	GO:0006310	DNA recombination	194	25	14.22	1.75809	0.00402	0.0679393
yellow	GO:0000738	DNA catabolic process, exonucleolytic	10	4	0.73	5.47945	0.0042	0.0701308
yellow	GO:0008340	determination of adult lifespan	10	4	0.73	5.47945	0.0042	0.0701308
yellow	GO:0006397	mRNA processing	390	43	28.58	1.50455	0.0045	0.0740521
yellow	GO:0033554	cellular response to stress	1139	106	83.47	1.26992	0.00505	0.0802625
yellow	GO:0002275	myeloid cell activation involved in immu...	30	7	2.2	3.18182	0.00507	0.0805017
yellow	GO:2000779	regulation of double-strand break repair	23	6	1.69	3.5503	0.00521	0.0818463
yellow	GO:0002221	pattern recognition receptor signaling p...	128	18	9.38	1.91898	0.00554	0.086025
yellow	GO:0006639	acylglycerol metabolic process	81	13	5.94	2.18855	0.00572	0.0883235
yellow	GO:0034599	cellular response to oxidative stress	100	15	7.33	2.04638	0.00598	0.0912132
yellow	GO:0050775	positive regulation of dendrite morphoge...	11	4	0.81	4.93827	0.00623	0.0944951
yellow	GO:0006638	neutral lipid metabolic process	82	13	6.01	2.16306	0.00636	0.0956645
yellow	GO:0051668	localization within membrane	39	8	2.86	2.7972	0.00644	0.0964004
yellow	GO:0002758	innate immune response-activating signal...	130	18	9.53	1.88877	0.00651	0.0966421
yellow	GO:0006378	mRNA polyadenylation	24	6	1.76	3.40909	0.00652	0.0966421
yellow	GO:0009411	response to UV	93	14	6.82	2.05279	0.00752	0.106703
yellow	GO:0044770	cell cycle phase transition	436	46	31.95	1.43975	0.00759	0.107602
yellow	GO:0046605	regulation of centrosome cycle	18	5	1.32	3.78788	0.008	0.112435
yellow	GO:0043631	RNA polyadenylation	25	6	1.83	3.27869	0.00806	0.112889
yellow	GO:0000086	G2/M transition of mitotic cell cycle	133	18	9.75	1.84615	0.00823	0.114579
yellow	GO:0006750	glutathione biosynthetic process	12	4	0.88	4.54545	0.0088	0.120963
yellow	GO:0034138	toll-like receptor 3 signaling pathway	76	12	5.57	2.1544	0.00885	0.121547
yellow	GO:0002218	activation of innate immune response	134	18	9.82	1.83299	0.00888	0.121857
yellow	GO:0007006	mitochondrial membrane organization	67	11	4.91	2.24033	0.00895	0.122097
yellow	GO:0002263	cell activation involved in immune respo...	86	13	6.3	2.06349	0.00948	0.126628
yellow	GO:0002366	leukocyte activation involved in immune ...	86	13	6.3	2.06349	0.00948	0.126628
yellow	GO:0006641	triglyceride metabolic process	77	12	5.64	2.12766	0.00981	0.12983
yellow	GO:0090329	regulation of DNA-dependent DNA replicat...	26	6	1.91	3.14136	0.00984	0.129989
yellow	GO:0006261	DNA-dependent DNA replication	97	14	7.11	1.96906	0.01083	0.139906
yellow	GO:0072655	establishment of protein localization to...	78	12	5.72	2.0979	0.01084	0.139906
yellow	GO:0035666	TRIF-dependent toll-like receptor signal...	69	11	5.06	2.17391	0.01112	0.142295
yellow	GO:0045089	positive regulation of innate immune res...	148	19	10.85	1.75115	0.01168	0.14645
yellow	GO:0042398	cellular modified amino acid biosyntheti...	43	8	3.15	2.53968	0.01173	0.146863
yellow	GO:0070585	protein localization to mitochondrion	79	12	5.79	2.07254	0.01196	0.148733
yellow	GO:0019184	nonribosomal peptide biosynthetic proces...	13	4	0.95	4.21053	0.01199	0.148733
yellow	GO:0046112	nucleobase biosynthetic process	13	4	0.95	4.21053	0.01199	0.148733
yellow	GO:0046174	polyol catabolic process	13	4	0.95	4.21053	0.01199	0.148733
yellow	GO:0050657	nucleic acid transport	128	17	9.38	1.81237	0.01203	0.148888
yellow	GO:0050658	RNA transport	128	17	9.38	1.81237	0.01203	0.148888
yellow	GO:0051236	establishment of RNA localization	128	17	9.38	1.81237	0.01203	0.148888
yellow	GO:0016053	organic acid biosynthetic process	223	26	16.34	1.59119	0.01234	0.151458
yellow	GO:0046394	carboxylic acid biosynthetic process	223	26	16.34	1.59119	0.01234	0.151458
yellow	GO:0009123	nucleoside monophosphate metabolic proce...	139	18	10.19	1.76644	0.01276	0.154516
yellow	GO:0006595	polyamine metabolic process	20	5	1.47	3.40136	0.01282	0.154782
yellow	GO:0035336	long-chain fatty-acyl-CoA metabolic proc...	20	5	1.47	3.40136	0.01282	0.154782
yellow	GO:0002756	MyD88-independent toll-like receptor sig...	71	11	5.2	2.11538	0.01368	0.161452
yellow	GO:0007005	mitochondrion organization	258	29	18.91	1.53358	0.0138	0.162162
yellow	GO:0016071	mRNA metabolic process	594	58	43.53	1.33241	0.01434	0.1667
yellow	GO:0048285	organelle fission	350	37	25.65	1.4425	0.01514	0.173646
yellow	GO:0044772	mitotic cell cycle phase transition	373	39	27.33	1.427	0.0152	0.174211
yellow	GO:0006998	nuclear envelope organization	54	9	3.96	2.27273	0.0157	0.178684
yellow	GO:0006396	RNA processing	633	61	46.39	1.31494	0.01581	0.179115
yellow	GO:0010824	regulation of centrosome duplication	14	4	1.03	3.8835	0.01583	0.179115
yellow	GO:0019433	triglyceride catabolic process	14	4	1.03	3.8835	0.01583	0.179115
yellow	GO:0008380	RNA splicing	317	34	23.23	1.46362	0.01587	0.179115
yellow	GO:0051028	mRNA transport	112	15	8.21	1.82704	0.01644	0.182885
yellow	GO:0050999	regulation of nitric-oxide synthase acti...	29	6	2.13	2.8169	0.01684	0.18619
yellow	GO:0009126	purine nucleoside monophosphate metaboli...	123	16	9.01	1.7758	0.01749	0.191278
yellow	GO:0009167	purine ribonucleoside monophosphate meta...	123	16	9.01	1.7758	0.01749	0.191278
yellow	GO:0009161	ribonucleoside monophosphate metabolic p...	134	17	9.82	1.73116	0.01836	0.197887
yellow	GO:0031572	G2 DNA damage checkpoint	30	6	2.2	2.72727	0.01978	0.208903
yellow	GO:0007018	microtubule-based movement	146	18	10.7	1.68224	0.02031	0.212138
yellow	GO:0043543	protein acylation	146	18	10.7	1.68224	0.02031	0.212138
yellow	GO:0006337	nucleosome disassembly	15	4	1.1	3.63636	0.02036	0.212138
yellow	GO:0031498	chromatin disassembly	15	4	1.1	3.63636	0.02036	0.212138
yellow	GO:0032986	protein-DNA complex disassembly	15	4	1.1	3.63636	0.02036	0.212138
yellow	GO:0033962	cytoplasmic mRNA processing body assembl...	15	4	1.1	3.63636	0.02036	0.212138
yellow	GO:0046461	neutral lipid catabolic process	15	4	1.1	3.63636	0.02036	0.212138
yellow	GO:0046464	acylglycerol catabolic process	15	4	1.1	3.63636	0.02036	0.212138
yellow	GO:0006403	RNA localization	136	17	9.97	1.70512	0.02096	0.217138
yellow	GO:0010564	regulation of cell cycle process	394	40	28.87	1.38552	0.02182	0.223487
yellow	GO:0006289	nucleotide-excision repair	76	11	5.57	1.97487	0.02199	0.22424
yellow	GO:0000280	nuclear division	325	34	23.82	1.42737	0.02219	0.225996
yellow	GO:0007067	mitosis	325	34	23.82	1.42737	0.02219	0.225996
yellow	GO:0006473	protein acetylation	127	16	9.31	1.71858	0.02303	0.231853
yellow	GO:0035337	fatty-acyl-CoA metabolic process	23	5	1.69	2.95858	0.0232	0.2325
yellow	GO:1900739	regulation of protein insertion into mit...	23	5	1.69	2.95858	0.0232	0.2325
yellow	GO:1900740	positive regulation of protein insertion...	23	5	1.69	2.95858	0.0232	0.2325
yellow	GO:0046364	monosaccharide biosynthetic process	58	9	4.25	2.11765	0.02426	0.241635
yellow	GO:0007017	microtubule-based process	409	41	29.97	1.36803	0.02458	0.243927
yellow	GO:0033043	regulation of organelle organization	516	50	37.81	1.3224	0.02488	0.246153
yellow	GO:0032465	regulation of cytokinesis	32	6	2.34	2.5641	0.02667	0.258828
yellow	GO:0042108	positive regulation of cytokine biosynth...	32	6	2.34	2.5641	0.02667	0.258828
yellow	GO:0001844	protein insertion into mitochondrial mem...	24	5	1.76	2.84091	0.02759	0.265069
yellow	GO:0034162	toll-like receptor 9 signaling pathway	69	10	5.06	1.97628	0.02798	0.26743
yellow	GO:0097193	intrinsic apoptotic signaling pathway	173	20	12.68	1.57729	0.02811	0.268165
yellow	GO:0006997	nucleus organization	79	11	5.79	1.89983	0.02849	0.270996
yellow	GO:0044711	single-organism biosynthetic process	344	35	25.21	1.38834	0.02963	0.278839
yellow	GO:0010827	regulation of glucose transport	70	10	5.13	1.94932	0.03059	0.282943
yellow	GO:0032768	regulation of monooxygenase activity	33	6	2.42	2.47934	0.03065	0.282943
yellow	GO:0044786	cell cycle DNA replication	33	6	2.42	2.47934	0.03065	0.282943
yellow	GO:0051205	protein insertion into membrane	33	6	2.42	2.47934	0.03065	0.282943
yellow	GO:1901028	regulation of mitochondrial outer membra...	33	6	2.42	2.47934	0.03065	0.282943
yellow	GO:0031124	mRNA 3'-end processing	90	12	6.6	1.81818	0.03083	0.284398
yellow	GO:0006635	fatty acid beta-oxidation	51	8	3.74	2.13904	0.03085	0.284398
yellow	GO:0001522	pseudouridine synthesis	17	4	1.25	3.2	0.03159	0.289761
yellow	GO:0002279	mast cell activation involved in immune ...	17	4	1.25	3.2	0.03159	0.289761
yellow	GO:0009113	purine nucleobase biosynthetic process	10	3	0.73	4.10959	0.03188	0.290021
yellow	GO:0032607	interferon-alpha production	10	3	0.73	4.10959	0.03188	0.290021
yellow	GO:0032647	regulation of interferon-alpha productio...	10	3	0.73	4.10959	0.03188	0.290021
yellow	GO:0033006	regulation of mast cell activation invol...	10	3	0.73	4.10959	0.03188	0.290021
yellow	GO:0035774	positive regulation of insulin secretion...	10	3	0.73	4.10959	0.03188	0.290021
yellow	GO:0046040	IMP metabolic process	10	3	0.73	4.10959	0.03188	0.290021
yellow	GO:0060707	trophoblast giant cell differentiation	10	3	0.73	4.10959	0.03188	0.290021
yellow	GO:1902117	positive regulation of organelle assembl...	10	3	0.73	4.10959	0.03188	0.290021
yellow	GO:0000722	telomere maintenance via recombination	25	5	1.83	2.73224	0.03247	0.292446
yellow	GO:0051204	protein insertion into mitochondrial mem...	25	5	1.83	2.73224	0.03247	0.292446
yellow	GO:0050769	positive regulation of neurogenesis	101	13	7.4	1.75676	0.03265	0.293542
yellow	GO:0034142	toll-like receptor 4 signaling pathway	91	12	6.67	1.7991	0.03324	0.297733
yellow	GO:0043044	ATP-dependent chromatin remodeling	34	6	2.49	2.40964	0.03499	0.309659
yellow	GO:0043297	apical junction assembly	43	7	3.15	2.22222	0.03521	0.311436
yellow	GO:0090305	nucleic acid phosphodiester bond hydroly...	62	9	4.54	1.98238	0.03571	0.314832
yellow	GO:0006275	regulation of DNA replication	82	11	6.01	1.83028	0.03626	0.316764
yellow	GO:0010948	negative regulation of cell cycle proces...	257	27	18.83	1.43388	0.03669	0.318299
yellow	GO:0019319	hexose biosynthetic process	53	8	3.88	2.06186	0.0378	0.324221
yellow	GO:0010508	positive regulation of autophagy	26	5	1.91	2.6178	0.03786	0.324221
yellow	GO:0018904	ether metabolic process	18	4	1.32	3.0303	0.03833	0.326264
yellow	GO:0015931	nucleobase-containing compound transport	146	17	10.7	1.58879	0.03834	0.326264
yellow	GO:0006401	RNA catabolic process	213	23	15.61	1.47341	0.03918	0.330378
yellow	GO:0044283	small molecule biosynthetic process	340	34	24.92	1.36437	0.03923	0.330378
yellow	GO:0006405	RNA export from nucleus	73	10	5.35	1.86916	0.03942	0.331213
yellow	GO:0006312	mitotic recombination	35	6	2.56	2.34375	0.03971	0.332787
yellow	GO:0022607	cellular component assembly	1435	122	105.16	1.16014	0.03994	0.334031
yellow	GO:0031123	RNA 3'-end processing	104	13	7.62	1.70604	0.04011	0.335108
yellow	GO:0009314	response to radiation	306	31	22.42	1.38269	0.04087	0.339714
yellow	GO:0009310	amine catabolic process	11	3	0.81	3.7037	0.04149	0.343464
yellow	GO:0042402	cellular biogenic amine catabolic proces...	11	3	0.81	3.7037	0.04149	0.343464
yellow	GO:0045292	mRNA cis splicing, via spliceosome	11	3	0.81	3.7037	0.04149	0.343464
yellow	GO:2000104	negative regulation of DNA-dependent DNA...	11	3	0.81	3.7037	0.04149	0.343464
yellow	GO:0006282	regulation of DNA repair	54	8	3.96	2.0202	0.04165	0.344088
yellow	GO:0031047	gene silencing by RNA	54	8	3.96	2.0202	0.04165	0.344088
yellow	GO:0031349	positive regulation of defense response	181	20	13.26	1.5083	0.04242	0.349917
yellow	GO:0008630	intrinsic apoptotic signaling pathway in...	64	9	4.69	1.91898	0.04263	0.350937
yellow	GO:0051341	regulation of oxidoreductase activity	45	7	3.3	2.12121	0.04375	0.357788
yellow	GO:0006338	chromatin remodeling	95	12	6.96	1.72414	0.04425	0.361349
yellow	GO:0016445	somatic diversification of immunoglobuli...	36	6	2.64	2.27273	0.04482	0.364176
yellow	GO:0070830	tight junction assembly	36	6	2.64	2.27273	0.04482	0.364176
yellow	GO:0008652	cellular amino acid biosynthetic process	85	11	6.23	1.76565	0.04541	0.368602
yellow	GO:0006626	protein targeting to mitochondrion	55	8	4.03	1.98511	0.04574	0.370911
yellow	GO:0034243	regulation of transcription elongation f...	19	4	1.39	2.8777	0.04583	0.371456
yellow	GO:1901988	negative regulation of cell cycle phase ...	228	24	16.71	1.43627	0.04595	0.372243
yellow	GO:0045088	regulation of innate immune response	183	20	13.41	1.49142	0.04671	0.377836
yellow	GO:0044282	small molecule catabolic process	206	22	15.1	1.45695	0.04759	0.382483
yellow	GO:0044712	single-organism catabolic process	206	22	15.1	1.45695	0.04759	0.382483
yellow	GO:0044237	cellular metabolic process	7133	545	522.71	1.04264	0.04838	0.386641
yellow	GO:0042440	pigment metabolic process	46	7	3.37	2.07715	0.04848	0.386771
yellow	GO:0048519	negative regulation of biological proces...	2609	211	191.19	1.10361	0.04969	0.396115
yellow	GO:0035065	regulation of histone acetylation	28	5	2.05	2.43902	0.05019	0.398265
yellow	GO:2000106	regulation of leukocyte apoptotic proces...	37	6	2.71	2.21402	0.05031	0.399023
yellow	GO:0033365	protein localization to organelle	492	46	36.05	1.27601	0.05095	0.402139
yellow	GO:0006379	mRNA cleavage	12	3	0.88	3.40909	0.05239	0.411112
yellow	GO:0019430	removal of superoxide radicals	12	3	0.88	3.40909	0.05239	0.411112
yellow	GO:0051131	chaperone-mediated protein complex assem...	12	3	0.88	3.40909	0.05239	0.411112
yellow	GO:0071451	cellular response to superoxide	12	3	0.88	3.40909	0.05239	0.411112
yellow	GO:0051259	protein oligomerization	278	28	20.37	1.37457	0.05314	0.415951
yellow	GO:0019432	triglyceride biosynthetic process	47	7	3.44	2.03488	0.05352	0.418567
yellow	GO:0046148	pigment biosynthetic process	38	6	2.78	2.15827	0.0562	0.432666
yellow	GO:0097345	mitochondrial outer membrane permeabiliz...	38	6	2.78	2.15827	0.0562	0.432666
yellow	GO:1901888	regulation of cell junction assembly	38	6	2.78	2.15827	0.0562	0.432666
yellow	GO:0045646	regulation of erythrocyte differentiatio...	29	5	2.13	2.34742	0.05713	0.438581
yellow	GO:0046034	ATP metabolic process	99	12	7.25	1.65517	0.05756	0.440842
yellow	GO:0044238	primary metabolic process	7135	544	522.86	1.04043	0.05787	0.441652
yellow	GO:1901987	regulation of cell cycle phase transitio...	257	26	18.83	1.38078	0.05811	0.442555
yellow	GO:0000910	cytokinesis	121	14	8.87	1.57835	0.05894	0.447828
yellow	GO:0001824	blastocyst development	58	8	4.25	1.88235	0.05957	0.451772
yellow	GO:0051053	negative regulation of DNA metabolic pro...	58	8	4.25	1.88235	0.05957	0.451772
yellow	GO:0051301	cell division	449	42	32.9	1.2766	0.05969	0.452471
yellow	GO:0008645	hexose transport	89	11	6.52	1.68712	0.05991	0.452663
yellow	GO:0015758	glucose transport	89	11	6.52	1.68712	0.05991	0.452663
yellow	GO:0048523	negative regulation of cellular process	2401	194	175.95	1.10259	0.06139	0.461488
yellow	GO:0000375	RNA splicing, via transesterification re...	212	22	15.54	1.4157	0.06152	0.462039
yellow	GO:0044242	cellular lipid catabolic process	111	13	8.13	1.59902	0.06202	0.46515
yellow	GO:0010720	positive regulation of cell development	133	15	9.75	1.53846	0.06226	0.46652
yellow	GO:1902110	positive regulation of mitochondrial mem...	39	6	2.86	2.0979	0.06249	0.466963
yellow	GO:0008152	metabolic process	7671	582	562.13	1.03535	0.06285	0.468783
turquoise	GO:0044260	cellular macromolecule metabolic process	5654	827	684.61	1.20799	5.6e-17	3.14276e-14
turquoise	GO:0010467	gene expression	3722	575	450.67	1.27588	3e-14	1.13547e-11
turquoise	GO:0090304	nucleic acid metabolic process	3758	576	455.03	1.26585	1.5e-13	4.60613e-11
turquoise	GO:0016070	RNA metabolic process	3311	517	400.91	1.28957	2.9e-13	8.28026e-11
turquoise	GO:0006396	RNA processing	633	139	76.65	1.81344	4.7e-13	1.29648e-10
turquoise	GO:0043170	macromolecule metabolic process	6064	856	734.25	1.16582	4.9e-13	1.32913e-10
turquoise	GO:0006139	nucleobase-containing compound metabolic...	4389	643	531.44	1.20992	2.8e-11	5.00769e-09
turquoise	GO:0006725	cellular aromatic compound metabolic pro...	4506	652	545.6	1.19501	2.3e-10	3.70619e-08
turquoise	GO:0046483	heterocycle metabolic process	4505	651	545.48	1.19344	3.2e-10	5.05631e-08
turquoise	GO:1901360	organic cyclic compound metabolic proces...	4644	666	562.31	1.1844	7.2e-10	1.06527e-07
turquoise	GO:0034641	cellular nitrogen compound metabolic pro...	4679	667	566.55	1.1773	2.3e-09	3.0936e-07
turquoise	GO:0044237	cellular metabolic process	7133	959	863.69	1.11035	2.7e-09	3.57256e-07
turquoise	GO:0016071	mRNA metabolic process	594	120	71.92	1.66852	5e-09	6.11842e-07
turquoise	GO:0071156	regulation of cell cycle arrest	86	31	10.41	2.97791	7.9e-09	8.86707e-07
turquoise	GO:0022613	ribonucleoprotein complex biogenesis	251	62	30.39	2.04014	2e-08	2.00926e-06
turquoise	GO:0006397	mRNA processing	390	85	47.22	1.80008	3e-08	2.87206e-06
turquoise	GO:0034470	ncRNA processing	204	52	24.7	2.10526	9.4e-08	7.80536e-06
turquoise	GO:0006977	DNA damage response, signal transduction...	63	24	7.63	3.14548	1.1e-07	8.73293e-06
turquoise	GO:0072413	signal transduction involved in mitotic ...	63	24	7.63	3.14548	1.1e-07	8.73293e-06
turquoise	GO:0072431	signal transduction involved in mitotic ...	63	24	7.63	3.14548	1.1e-07	8.73293e-06
turquoise	GO:0008380	RNA splicing	317	71	38.38	1.84992	1.4e-07	1.09019e-05
turquoise	GO:0000375	RNA splicing, via transesterification re...	212	53	25.67	2.06467	1.4e-07	1.09019e-05
turquoise	GO:0000377	RNA splicing, via transesterification re...	207	52	25.06	2.07502	1.6e-07	1.1945e-05
turquoise	GO:0000398	mRNA splicing, via spliceosome	207	52	25.06	2.07502	1.6e-07	1.1945e-05
turquoise	GO:0072401	signal transduction involved in DNA inte...	64	24	7.75	3.09677	1.6e-07	1.1945e-05
turquoise	GO:0072422	signal transduction involved in DNA dama...	64	24	7.75	3.09677	1.6e-07	1.1945e-05
turquoise	GO:0007050	cell cycle arrest	197	50	23.85	2.09644	1.9e-07	1.38666e-05
turquoise	GO:0044238	primary metabolic process	7135	947	863.93	1.09615	2e-07	1.44027e-05
turquoise	GO:0072395	signal transduction involved in cell cyc...	65	24	7.87	3.04956	2.3e-07	1.64178e-05
turquoise	GO:0051437	positive regulation of ubiquitin-protein...	70	25	8.48	2.94811	2.7e-07	1.86989e-05
turquoise	GO:0006807	nitrogen compound metabolic process	4965	687	601.18	1.14275	3.2e-07	2.13443e-05
turquoise	GO:0034660	ncRNA metabolic process	289	65	34.99	1.85767	3.9e-07	2.47939e-05
turquoise	GO:0044773	mitotic DNA damage checkpoint	76	26	9.2	2.82609	4.2e-07	2.63919e-05
turquoise	GO:0071158	positive regulation of cell cycle arrest	76	26	9.2	2.82609	4.2e-07	2.63919e-05
turquoise	GO:0051436	negative regulation of ubiquitin-protein...	67	24	8.11	2.95931	4.4e-07	2.74368e-05
turquoise	GO:0000209	protein polyubiquitination	167	43	20.22	2.12661	9e-07	5.15757e-05
turquoise	GO:0044774	mitotic DNA integrity checkpoint	79	26	9.57	2.71682	9.8e-07	5.51886e-05
turquoise	GO:0042254	ribosome biogenesis	151	40	18.28	2.18818	9.8e-07	5.51886e-05
turquoise	GO:0071704	organic substance metabolic process	7336	965	888.27	1.08638	1.1e-06	5.9675e-05
turquoise	GO:0006521	regulation of cellular amino acid metabo...	52	20	6.3	3.1746	1.1e-06	5.9675e-05
turquoise	GO:0031571	mitotic G1 DNA damage checkpoint	70	24	8.48	2.83019	1.1e-06	5.9675e-05
turquoise	GO:0044783	G1 DNA damage checkpoint	70	24	8.48	2.83019	1.1e-06	5.9675e-05
turquoise	GO:0051352	negative regulation of ligase activity	71	24	8.6	2.7907	1.5e-06	8.0041e-05
turquoise	GO:0051444	negative regulation of ubiquitin-protein...	71	24	8.6	2.7907	1.5e-06	8.0041e-05
turquoise	GO:0051439	regulation of ubiquitin-protein ligase a...	76	25	9.2	2.71739	1.6e-06	8.45455e-05
turquoise	GO:0008152	metabolic process	7671	1001	928.83	1.0777	2.4e-06	0.000122063
turquoise	GO:0051443	positive regulation of ubiquitin-protein...	78	25	9.44	2.64831	2.7e-06	0.000134381
turquoise	GO:2000045	regulation of G1/S transition of mitotic...	105	30	12.71	2.36035	4.2e-06	0.000199286
turquoise	GO:0045786	negative regulation of cell cycle	290	62	35.11	1.76588	4.4e-06	0.000206965
turquoise	GO:0031145	anaphase-promoting complex-dependent pro...	81	25	9.81	2.54842	5.8e-06	0.000262939
turquoise	GO:0051351	positive regulation of ligase activity	81	25	9.81	2.54842	5.8e-06	0.000262939
turquoise	GO:0000077	DNA damage checkpoint	128	34	15.5	2.19355	5.9e-06	0.000266729
turquoise	GO:0031570	DNA integrity checkpoint	134	35	16.23	2.1565	6.5e-06	0.000291426
turquoise	GO:0010948	negative regulation of cell cycle proces...	257	56	31.12	1.79949	6.9e-06	0.000306824
turquoise	GO:0000075	cell cycle checkpoint	212	48	25.67	1.86989	1.1e-05	0.000445336
turquoise	GO:0008334	histone mRNA metabolic process	25	12	3.03	3.9604	1.1e-05	0.000445336
turquoise	GO:0030330	DNA damage response, signal transduction...	100	28	12.11	2.31214	1.3e-05	0.000516037
turquoise	GO:0031398	positive regulation of protein ubiquitin...	127	33	15.38	2.14564	1.3e-05	0.000516037
turquoise	GO:0016567	protein ubiquitination	509	94	61.63	1.52523	1.4e-05	0.000551695
turquoise	GO:0034645	cellular macromolecule biosynthetic proc...	3494	491	423.07	1.16056	1.5e-05	0.000582637
turquoise	GO:2000134	negative regulation of G1/S transition o...	85	25	10.29	2.42954	1.5e-05	0.000582637
turquoise	GO:0072331	signal transduction by p53 class mediato...	128	33	15.5	2.12903	1.6e-05	0.000618527
turquoise	GO:0051438	regulation of ubiquitin-protein ligase a...	91	26	11.02	2.35935	1.8e-05	0.000686066
turquoise	GO:0006351	transcription, DNA-dependent	2621	379	317.36	1.19423	1.9e-05	0.000717459
turquoise	GO:0002479	antigen processing and presentation of e...	66	21	7.99	2.62829	1.9e-05	0.000717459
turquoise	GO:0070647	protein modification by small protein co...	610	108	73.86	1.46223	2.2e-05	0.000817466
turquoise	GO:0007093	mitotic cell cycle checkpoint	136	34	16.47	2.06436	2.4e-05	0.00088371
turquoise	GO:0042590	antigen processing and presentation of e...	67	21	8.11	2.5894	2.5e-05	0.000916385
turquoise	GO:0031397	negative regulation of protein ubiquitin...	98	27	11.87	2.27464	2.6e-05	0.000946644
turquoise	GO:0032446	protein modification by small protein co...	545	98	65.99	1.48507	2.8e-05	0.00101492
turquoise	GO:1901987	regulation of cell cycle phase transitio...	257	54	31.12	1.73522	3e-05	0.00107781
turquoise	GO:0042770	signal transduction in response to DNA d...	110	29	13.32	2.17718	3.2e-05	0.00114211
turquoise	GO:0051340	regulation of ligase activity	94	26	11.38	2.28471	3.4e-05	0.00121083
turquoise	GO:1901988	negative regulation of cell cycle phase ...	228	49	27.61	1.77472	3.8e-05	0.00134154
turquoise	GO:1901990	regulation of mitotic cell cycle phase t...	184	41	22.28	1.84022	6.7e-05	0.002267
turquoise	GO:0009059	macromolecule biosynthetic process	3562	493	431.3	1.14306	7.9e-05	0.00262929
turquoise	GO:0006984	ER-nucleus signaling pathway	93	25	11.26	2.22025	7.9e-05	0.00262929
turquoise	GO:1901991	negative regulation of mitotic cell cycl...	151	35	18.28	1.91466	9.8e-05	0.00318353
turquoise	GO:0008033	tRNA processing	74	21	8.96	2.34375	0.00013	0.00406094
turquoise	GO:0033238	regulation of cellular amine metabolic p...	69	20	8.35	2.39521	0.00013	0.00406094
turquoise	GO:0002474	antigen processing and presentation of p...	85	23	10.29	2.23518	0.00014	0.00434828
turquoise	GO:0006353	DNA-dependent transcription, termination	81	22	9.81	2.24261	0.00018	0.00536538
turquoise	GO:0032774	RNA biosynthetic process	2704	381	327.41	1.16368	0.00019	0.00561207
turquoise	GO:0022402	cell cycle process	1011	159	122.42	1.29881	0.0002	0.00587545
turquoise	GO:0030968	endoplasmic reticulum unfolded protein r...	82	22	9.93	2.21551	0.00021	0.006125
turquoise	GO:0035967	cellular response to topologically incor...	88	23	10.66	2.1576	0.00024	0.00692553
turquoise	GO:0031396	regulation of protein ubiquitination	176	38	21.31	1.7832	0.00024	0.00692553
turquoise	GO:0034620	cellular response to unfolded protein	83	22	10.05	2.18905	0.00026	0.00744982
turquoise	GO:0022403	cell cycle phase	247	49	29.91	1.63825	0.0003	0.00846187
turquoise	GO:0051276	chromosome organization	643	107	77.86	1.37426	0.0003	0.00846187
turquoise	GO:0010564	regulation of cell cycle process	394	71	47.71	1.48816	0.00033	0.00924398
turquoise	GO:0006364	rRNA processing	107	26	12.96	2.00617	0.00034	0.00945897
turquoise	GO:0016072	rRNA metabolic process	113	27	13.68	1.97368	0.00035	0.0096875
turquoise	GO:0071044	histone mRNA catabolic process	10	6	1.21	4.95868	0.00042	0.0113171
turquoise	GO:0043161	proteasomal ubiquitin-dependent protein ...	232	46	28.09	1.63759	0.00045	0.0119669
turquoise	GO:0010498	proteasomal protein catabolic process	245	48	29.67	1.6178	0.00046	0.0122129
turquoise	GO:0034654	nucleobase-containing compound biosynthe...	2926	405	354.29	1.14313	0.00052	0.0136061
turquoise	GO:0019438	aromatic compound biosynthetic process	2974	411	360.1	1.14135	0.00053	0.0137792
turquoise	GO:0051329	interphase of mitotic cell cycle	221	44	26.76	1.64425	0.00055	0.0141634
turquoise	GO:0006369	termination of RNA polymerase II transcr...	45	14	5.45	2.56881	0.0006	0.0151866
turquoise	GO:0018130	heterocycle biosynthetic process	2982	411	361.07	1.13828	0.00066	0.0163992
turquoise	GO:2000112	regulation of cellular macromolecule bio...	2620	365	317.24	1.15055	0.00069	0.0169378
turquoise	GO:0006839	mitochondrial transport	148	32	17.92	1.78571	0.00071	0.0173502
turquoise	GO:0051726	regulation of cell cycle	658	107	79.67	1.34304	0.00072	0.0175419
turquoise	GO:1901362	organic cyclic compound biosynthetic pro...	3058	420	370.27	1.13431	0.00075	0.0181641
turquoise	GO:0051325	interphase	225	44	27.24	1.61527	0.00081	0.0194436
turquoise	GO:0007346	regulation of mitotic cell cycle	278	52	33.66	1.54486	0.00084	0.0200161
turquoise	GO:0010468	regulation of gene expression	2809	388	340.12	1.14077	0.00086	0.0203438
turquoise	GO:0031124	mRNA 3'-end processing	90	22	10.9	2.01835	0.00087	0.0204613
turquoise	GO:0007049	cell cycle	1321	196	159.95	1.22538	0.0009	0.0210453
turquoise	GO:0000387	spliceosomal snRNP assembly	32	11	3.87	2.84238	0.0009	0.0210453
turquoise	GO:0010556	regulation of macromolecule biosynthetic...	2669	370	323.17	1.14491	0.00091	0.0211878
turquoise	GO:0009303	rRNA transcription	19	8	2.3	3.47826	0.001	0.0228581
turquoise	GO:0044271	cellular nitrogen compound biosynthetic ...	3029	415	366.76	1.13153	0.00101	0.0230221
turquoise	GO:0009452	7-methylguanosine RNA capping	33	11	4	2.75	0.0012	0.0263563
turquoise	GO:0036260	RNA capping	33	11	4	2.75	0.0012	0.0263563
turquoise	GO:0000082	G1/S transition of mitotic cell cycle	197	39	23.85	1.63522	0.00123	0.0268701
turquoise	GO:0051171	regulation of nitrogen compound metaboli...	2925	401	354.17	1.13222	0.00123	0.0268701
turquoise	GO:0031123	RNA 3'-end processing	104	24	12.59	1.90627	0.00124	0.0270161
turquoise	GO:0006399	tRNA metabolic process	122	27	14.77	1.82803	0.00125	0.0270889
turquoise	GO:2001141	regulation of RNA biosynthetic process	2399	334	290.48	1.14982	0.00134	0.0287711
turquoise	GO:0051252	regulation of RNA metabolic process	2462	342	298.11	1.14723	0.00135	0.0289476
turquoise	GO:0034976	response to endoplasmic reticulum stress	111	25	13.44	1.86012	0.00143	0.0304225
turquoise	GO:0043928	exonucleolytic nuclear-transcribed mRNA ...	29	10	3.51	2.849	0.00149	0.0315341
turquoise	GO:0006511	ubiquitin-dependent protein catabolic pr...	382	66	46.25	1.42703	0.00165	0.0343838
turquoise	GO:0044249	cellular biosynthetic process	4180	555	506.13	1.09656	0.00192	0.0388657
turquoise	GO:0006987	activation of signaling protein activity...	61	16	7.39	2.16509	0.00194	0.0391245
turquoise	GO:0000291	nuclear-transcribed mRNA catabolic proce...	30	10	3.63	2.75482	0.002	0.0401356
turquoise	GO:0051603	proteolysis involved in cellular protein...	406	69	49.16	1.40358	0.00202	0.0404373
turquoise	GO:0006355	regulation of transcription, DNA-depende...	2383	330	288.54	1.14369	0.00207	0.0410344
turquoise	GO:0051168	nuclear export	120	26	14.53	1.7894	0.00209	0.04128
turquoise	GO:0032069	regulation of nuclease activity	67	17	8.11	2.09618	0.0021	0.0413738
turquoise	GO:0019941	modification-dependent protein catabolic...	387	66	46.86	1.40845	0.0023	0.0440901
turquoise	GO:0090068	positive regulation of cell cycle proces...	159	32	19.25	1.66234	0.00246	0.0465541
turquoise	GO:0000278	mitotic cell cycle	771	119	93.36	1.27464	0.00258	0.0485066
turquoise	GO:1901576	organic substance biosynthetic process	4251	562	514.73	1.09183	0.00265	0.0495164
turquoise	GO:0032075	positive regulation of nuclease activity	63	16	7.63	2.09699	0.00278	0.0515901
turquoise	GO:0043632	modification-dependent macromolecule cat...	391	66	47.34	1.39417	0.00296	0.05425
turquoise	GO:0006400	tRNA modification	22	8	2.66	3.00752	0.00302	0.0549168
turquoise	GO:0010608	posttranscriptional regulation of gene e...	357	61	43.23	1.41106	0.00315	0.0568993
turquoise	GO:0044267	cellular protein metabolic process	2902	393	351.39	1.11842	0.00349	0.0613388
turquoise	GO:0000288	nuclear-transcribed mRNA catabolic proce...	59	15	7.14	2.10084	0.00368	0.0641242
turquoise	GO:0009058	biosynthetic process	4307	567	521.51	1.08723	0.00372	0.0646827
turquoise	GO:0006986	response to unfolded protein	125	26	15.14	1.71731	0.00378	0.065516
turquoise	GO:0043984	histone H4-K16 acetylation	14	6	1.7	3.52941	0.00395	0.0671748
turquoise	GO:0060255	regulation of macromolecule metabolic pr...	3509	468	424.88	1.10149	0.00403	0.0680376
turquoise	GO:0035966	response to topologically incorrect prot...	132	27	15.98	1.68961	0.00408	0.0688104
turquoise	GO:0006996	organelle organization	2102	291	254.52	1.14333	0.00416	0.06987
turquoise	GO:0044257	cellular protein catabolic process	419	69	50.73	1.36014	0.00447	0.0737822
turquoise	GO:0006626	protein targeting to mitochondrion	55	14	6.66	2.1021	0.00488	0.0784028
turquoise	GO:0016568	chromatin modification	428	70	51.82	1.35083	0.00497	0.0793007
turquoise	GO:0071826	ribonucleoprotein complex subunit organi...	128	26	15.5	1.67742	0.00526	0.0824725
turquoise	GO:0022618	ribonucleoprotein complex assembly	122	25	14.77	1.69262	0.00545	0.0849605
turquoise	GO:0031326	regulation of cellular biosynthetic proc...	2765	373	334.8	1.1141	0.00596	0.0910789
turquoise	GO:0006457	protein folding	176	33	21.31	1.54857	0.00669	0.0987124
turquoise	GO:0006325	chromatin organization	484	77	58.6	1.31399	0.00674	0.0991804
turquoise	GO:0016569	covalent chromatin modification	279	48	33.78	1.42096	0.00721	0.103568
turquoise	GO:0006370	7-methylguanosine mRNA capping	30	9	3.63	2.47934	0.00727	0.104246
turquoise	GO:0048285	organelle fission	350	58	42.38	1.36857	0.0076	0.10765
turquoise	GO:0044770	cell cycle phase transition	436	70	52.79	1.32601	0.00771	0.109018
turquoise	GO:0006383	transcription from RNA polymerase III pr...	52	13	6.3	2.06349	0.00771	0.109018
turquoise	GO:0019219	regulation of nucleobase-containing comp...	2850	382	345.09	1.10696	0.00806	0.112889
turquoise	GO:0006354	DNA-dependent transcription, elongation	107	22	12.96	1.69753	0.00844	0.116605
turquoise	GO:0015931	nucleobase-containing compound transport	146	28	17.68	1.58371	0.00875	0.120377
turquoise	GO:0009889	regulation of biosynthetic process	2784	373	337.1	1.1065	0.0092	0.124257
turquoise	GO:0050657	nucleic acid transport	128	25	15.5	1.6129	0.01016	0.13335
turquoise	GO:0050658	RNA transport	128	25	15.5	1.6129	0.01016	0.13335
turquoise	GO:0051236	establishment of RNA localization	128	25	15.5	1.6129	0.01016	0.13335
turquoise	GO:0006417	regulation of translation	215	38	26.03	1.45985	0.01023	0.134053
turquoise	GO:0071103	DNA conformation change	148	28	17.92	1.5625	0.01051	0.137059
turquoise	GO:0007005	mitochondrion organization	258	44	31.24	1.40845	0.01139	0.143811
turquoise	GO:0032270	positive regulation of cellular protein ...	695	104	84.15	1.23589	0.01158	0.14542
turquoise	GO:0006405	RNA export from nucleus	73	16	8.84	1.80995	0.01254	0.152647
turquoise	GO:0009451	RNA modification	73	16	8.84	1.80995	0.01254	0.152647
turquoise	GO:0007006	mitochondrial membrane organization	67	15	8.11	1.84957	0.01267	0.153769
turquoise	GO:0033554	cellular response to stress	1139	162	137.91	1.17468	0.01305	0.15686
turquoise	GO:0044106	cellular amine metabolic process	151	28	18.28	1.53173	0.01368	0.161452
turquoise	GO:0016570	histone modification	275	46	33.3	1.38138	0.01378	0.162162
turquoise	GO:0006412	translation	455	71	55.09	1.2888	0.01393	0.163219
turquoise	GO:0048002	antigen processing and presentation of p...	158	29	19.13	1.51594	0.01404	0.164269
turquoise	GO:0000280	nuclear division	325	53	39.35	1.34689	0.01406	0.164269
turquoise	GO:0007067	mitosis	325	53	39.35	1.34689	0.01406	0.164269
turquoise	GO:0006476	protein deacetylation	50	12	6.05	1.98347	0.01426	0.165891
turquoise	GO:0046782	regulation of viral transcription	62	14	7.51	1.86418	0.01459	0.168885
turquoise	GO:0006974	response to DNA damage stimulus	612	92	74.1	1.24157	0.01511	0.173424
turquoise	GO:0002478	antigen processing and presentation of e...	146	27	17.68	1.52715	0.01579	0.179115
turquoise	GO:0006323	DNA packaging	113	22	13.68	1.60819	0.0158	0.179115
turquoise	GO:0051247	positive regulation of protein metabolic...	756	111	91.54	1.21258	0.01592	0.179408
turquoise	GO:0006385	transcription elongation from RNA polyme...	18	6	2.18	2.75229	0.01594	0.179408
turquoise	GO:0006386	termination of RNA polymerase III transc...	18	6	2.18	2.75229	0.01594	0.179408
turquoise	GO:0010822	positive regulation of mitochondrion org...	45	11	5.45	2.01835	0.01621	0.180821
turquoise	GO:0006406	mRNA export from nucleus	63	14	7.63	1.83486	0.01673	0.185099
turquoise	GO:0044772	mitotic cell cycle phase transition	373	59	45.16	1.30647	0.01819	0.196575
turquoise	GO:0016575	histone deacetylation	40	10	4.84	2.06612	0.01835	0.197887
turquoise	GO:0019884	antigen processing and presentation of e...	148	27	17.92	1.5067	0.01868	0.200937
turquoise	GO:0048524	positive regulation of viral process	70	15	8.48	1.76887	0.01872	0.201076
turquoise	GO:0030520	intracellular estrogen receptor signalin...	29	8	3.51	2.2792	0.01881	0.201801
turquoise	GO:0015992	proton transport	52	12	6.3	1.90476	0.01933	0.205216
turquoise	GO:0042776	mitochondrial ATP synthesis coupled prot...	14	5	1.7	2.94118	0.02021	0.212036
turquoise	GO:0006739	NADP metabolic process	24	7	2.91	2.4055	0.02022	0.212036
blue	GO:0006892	post-Golgi vesicle-mediated transport	78	24	7.75	3.09677	2.7e-07	1.86989e-05
blue	GO:0048193	Golgi vesicle transport	180	40	17.89	2.23589	7.7e-07	4.57363e-05
blue	GO:0006352	DNA-dependent transcription, initiation	203	41	20.18	2.03171	7.3e-06	0.000321972
blue	GO:0007049	cell cycle	1321	177	131.29	1.34816	9.8e-06	0.000410013
blue	GO:0006367	transcription initiation from RNA polyme...	175	36	17.39	2.07016	1.7e-05	0.000651
blue	GO:0044237	cellular metabolic process	7133	771	708.93	1.08755	1.9e-05	0.000717459
blue	GO:0044260	cellular macromolecule metabolic process	5654	625	561.94	1.11222	3.5e-05	0.00124372
blue	GO:0006796	phosphate-containing compound metabolic ...	2031	251	201.86	1.24344	4.8e-05	0.00166923
blue	GO:0016044	cellular membrane organization	630	93	62.61	1.48539	5.1e-05	0.00176601
blue	GO:0061024	membrane organization	631	93	62.71	1.48302	5.4e-05	0.00186197
blue	GO:0046907	intracellular transport	1171	155	116.38	1.33184	7.3e-05	0.0024446
blue	GO:1901068	guanosine-containing compound metabolic ...	311	52	30.91	1.6823	0.00012	0.00380702
blue	GO:0022904	respiratory electron transport chain	95	22	9.44	2.33051	0.00012	0.00380702
blue	GO:0006793	phosphorus metabolic process	2068	252	205.53	1.2261	0.00012	0.00380702
blue	GO:0016197	endosomal transport	142	29	14.11	2.05528	0.00013	0.00406094
blue	GO:0006184	GTP catabolic process	297	50	29.52	1.69377	0.00013	0.00406094
blue	GO:0046039	GTP metabolic process	305	51	30.31	1.68261	0.00013	0.00406094
blue	GO:0022900	electron transport chain	96	22	9.54	2.30608	0.00014	0.00434828
blue	GO:1901069	guanosine-containing compound catabolic ...	299	50	29.72	1.68237	0.00016	0.0048764
blue	GO:0008105	asymmetric protein localization	14	7	1.39	5.03597	0.00017	0.00513312
blue	GO:0006464	cellular protein modification process	2200	265	218.65	1.21198	0.00017	0.00513312
blue	GO:0036211	protein modification process	2200	265	218.65	1.21198	0.00017	0.00513312
blue	GO:0044267	cellular protein metabolic process	2902	339	288.42	1.17537	0.00018	0.00536538
blue	GO:0070647	protein modification by small protein co...	610	88	60.63	1.45143	0.00018	0.00536538
blue	GO:0008152	metabolic process	7671	813	762.4	1.06637	0.00025	0.00717593
blue	GO:0031323	regulation of cellular metabolic process	3706	421	368.33	1.143	0.00025	0.00717593
blue	GO:0045333	cellular respiration	143	28	14.21	1.97044	0.00034	0.00945897
blue	GO:0006152	purine nucleoside catabolic process	373	58	37.07	1.56461	0.00036	0.00993051
blue	GO:0046130	purine ribonucleoside catabolic process	373	58	37.07	1.56461	0.00036	0.00993051
blue	GO:1901136	carbohydrate derivative catabolic proces...	480	71	47.71	1.48816	0.00037	0.0101547
blue	GO:0009164	nucleoside catabolic process	383	59	38.07	1.54978	0.00041	0.0111212
blue	GO:0038061	NIK/NF-kappaB cascade	16	7	1.59	4.40252	0.00048	0.0127024
blue	GO:0042454	ribonucleoside catabolic process	378	58	37.57	1.54378	0.0005	0.0131675
blue	GO:0009203	ribonucleoside triphosphate catabolic pr...	362	56	35.98	1.55642	0.00051	0.0133875
blue	GO:0009207	purine ribonucleoside triphosphate catab...	362	56	35.98	1.55642	0.00051	0.0133875
blue	GO:0043412	macromolecule modification	2303	272	228.89	1.18834	0.00052	0.0136061
blue	GO:1901658	glycosyl compound catabolic process	387	59	38.46	1.53406	0.00053	0.0137792
blue	GO:0009166	nucleotide catabolic process	428	64	42.54	1.50447	0.00054	0.0139944
blue	GO:0009146	purine nucleoside triphosphate catabolic...	364	56	36.18	1.54782	0.00058	0.0147262
blue	GO:0006996	organelle organization	2102	250	208.91	1.19669	0.00063	0.0157985
blue	GO:0000280	nuclear division	325	51	32.3	1.57895	0.00064	0.015951
blue	GO:0007067	mitosis	325	51	32.3	1.57895	0.00064	0.015951
blue	GO:0046434	organophosphate catabolic process	464	68	46.12	1.47441	0.00064	0.015951
blue	GO:0009143	nucleoside triphosphate catabolic proces...	366	56	36.38	1.53931	0.00067	0.0165718
blue	GO:0048285	organelle fission	350	54	34.79	1.55217	0.00068	0.0167175
blue	GO:1901292	nucleoside phosphate catabolic process	433	64	43.03	1.48733	0.00073	0.017759
blue	GO:0000045	autophagic vacuole assembly	27	9	2.68	3.35821	0.00082	0.0196257
blue	GO:0019222	regulation of metabolic process	4021	448	399.64	1.12101	0.00085	0.0201658
blue	GO:0009154	purine ribonucleotide catabolic process	386	58	38.36	1.51199	0.00085	0.0201658
blue	GO:0008104	protein localization	1462	180	145.31	1.23873	0.00087	0.0204613
blue	GO:0009261	ribonucleotide catabolic process	387	58	38.46	1.50806	0.00091	0.0211878
blue	GO:0019941	modification-dependent protein catabolic...	387	58	38.46	1.50806	0.00091	0.0211878
blue	GO:0080090	regulation of primary metabolic process	3634	408	361.18	1.12963	0.00095	0.022056
blue	GO:0060255	regulation of macromolecule metabolic pr...	3509	395	348.75	1.13262	0.00099	0.0227574
blue	GO:0006511	ubiquitin-dependent protein catabolic pr...	382	57	37.97	1.50119	0.00111	0.0246121
blue	GO:0051301	cell division	449	65	44.63	1.45642	0.00115	0.0254297
blue	GO:0043632	modification-dependent macromolecule cat...	391	58	38.86	1.49254	0.00117	0.0258018
blue	GO:0072523	purine-containing compound catabolic pro...	417	61	41.44	1.47201	0.00125	0.0270889
blue	GO:0046128	purine ribonucleoside metabolic process	459	66	45.62	1.44673	0.00126	0.0272331
blue	GO:0016310	phosphorylation	1073	136	106.64	1.27532	0.00131	0.0282014
blue	GO:0022402	cell cycle process	1011	129	100.48	1.28384	0.00136	0.0291237
blue	GO:0006139	nucleobase-containing compound metabolic...	4389	483	436.21	1.10726	0.0014	0.0298624
blue	GO:0042278	purine nucleoside metabolic process	462	66	45.92	1.43728	0.00149	0.0315341
blue	GO:0033036	macromolecule localization	1684	202	167.37	1.20691	0.00155	0.0327189
blue	GO:0045184	establishment of protein localization	1178	147	117.08	1.25555	0.00158	0.0332658
blue	GO:0007009	plasma membrane organization	121	23	12.03	1.91189	0.00168	0.034875
blue	GO:0006195	purine nucleotide catabolic process	414	60	41.15	1.45808	0.00171	0.0354074
blue	GO:0043170	macromolecule metabolic process	6064	649	602.69	1.07684	0.00172	0.0355693
blue	GO:0051603	proteolysis involved in cellular protein...	406	59	40.35	1.46221	0.00175	0.0359612
blue	GO:0019219	regulation of nucleobase-containing comp...	2850	324	283.26	1.14383	0.00193	0.0390196
blue	GO:0042773	ATP synthesis coupled electron transport	48	12	4.77	2.51572	0.00207	0.0410344
blue	GO:0042775	mitochondrial ATP synthesis coupled elec...	48	12	4.77	2.51572	0.00207	0.0410344
blue	GO:0051641	cellular localization	1825	216	181.38	1.19087	0.00207	0.0410344
blue	GO:0032446	protein modification by small protein co...	545	75	54.17	1.38453	0.00208	0.0411825
blue	GO:0007059	chromosome segregation	145	26	14.41	1.8043	0.00209	0.04128
blue	GO:0009116	nucleoside metabolic process	511	71	50.79	1.39791	0.00211	0.0413738
blue	GO:0009119	ribonucleoside metabolic process	477	67	47.41	1.4132	0.00213	0.0416656
blue	GO:0016192	vesicle-mediated transport	809	105	80.4	1.30597	0.00221	0.0428188
blue	GO:0015031	protein transport	1124	140	111.71	1.25325	0.00221	0.0428188
blue	GO:0051650	establishment of vesicle localization	109	21	10.83	1.93906	0.00221	0.0428188
blue	GO:0009205	purine ribonucleoside triphosphate metab...	402	58	39.95	1.45181	0.00225	0.0434902
blue	GO:1901657	glycosyl compound metabolic process	521	72	51.78	1.3905	0.00227	0.0436693
blue	GO:0010556	regulation of macromolecule biosynthetic...	2669	304	265.27	1.146	0.00252	0.0475789
blue	GO:0006120	mitochondrial electron transport, NADH t...	37	10	3.68	2.71739	0.00258	0.0485066
blue	GO:0051648	vesicle localization	133	24	13.22	1.81543	0.00279	0.0516578
blue	GO:0000278	mitotic cell cycle	771	100	76.63	1.30497	0.00286	0.0527738
blue	GO:0016567	protein ubiquitination	509	70	50.59	1.38367	0.00294	0.0540661
blue	GO:0046483	heterocycle metabolic process	4505	491	447.74	1.09662	0.00296	0.05425
blue	GO:0009144	purine nucleoside triphosphate metabolic...	407	58	40.45	1.43387	0.00298	0.0544938
blue	GO:0044248	cellular catabolic process	1511	181	150.18	1.20522	0.00299	0.0545541
blue	GO:0046328	regulation of JNK cascade	112	21	11.13	1.88679	0.00311	0.0563644
blue	GO:0009199	ribonucleoside triphosphate metabolic pr...	408	58	40.55	1.43033	0.00315	0.0568993
blue	GO:0032435	negative regulation of proteasomal ubiqu...	16	6	1.59	3.77358	0.00317	0.0571337
blue	GO:0046330	positive regulation of JNK cascade	38	10	3.78	2.6455	0.00319	0.0573671
blue	GO:0007088	regulation of mitosis	91	18	9.04	1.99115	0.00329	0.0587758
blue	GO:0051783	regulation of nuclear division	91	18	9.04	1.99115	0.00329	0.0587758
blue	GO:0030163	protein catabolic process	512	70	50.89	1.37552	0.0034	0.0602122
blue	GO:0044257	cellular protein catabolic process	419	59	41.64	1.41691	0.00361	0.0633112
blue	GO:0006725	cellular aromatic compound metabolic pro...	4506	490	447.84	1.09414	0.00366	0.0639126
blue	GO:0007264	small GTPase mediated signal transductio...	557	75	55.36	1.35477	0.00368	0.0641242
blue	GO:2000112	regulation of cellular macromolecule bio...	2620	297	260.4	1.14055	0.00383	0.0659611
blue	GO:0034645	cellular macromolecule biosynthetic proc...	3494	387	347.26	1.11444	0.0039	0.066533
blue	GO:0097479	synaptic vesicle localization	65	14	6.46	2.16718	0.00409	0.0688363
blue	GO:0051403	stress-activated MAPK cascade	191	31	18.98	1.6333	0.00416	0.06987
blue	GO:0009141	nucleoside triphosphate metabolic proces...	422	59	41.94	1.40677	0.00423	0.07032
blue	GO:0051656	establishment of organelle localization	168	28	16.7	1.67665	0.0043	0.0713379
blue	GO:0032872	regulation of stress-activated MAPK casc...	130	23	12.92	1.78019	0.00436	0.0722597
blue	GO:0045132	meiotic chromosome segregation	17	6	1.69	3.5503	0.00449	0.0739623
blue	GO:1901799	negative regulation of proteasomal prote...	17	6	1.69	3.5503	0.00449	0.0739623
blue	GO:0032874	positive regulation of stress-activated ...	46	11	4.57	2.407	0.00453	0.0741708
blue	GO:0043161	proteasomal ubiquitin-dependent protein ...	232	36	23.06	1.56114	0.00455	0.0744234
blue	GO:0071702	organic substance transport	1629	192	161.9	1.18592	0.00457	0.0746755
blue	GO:0009059	macromolecule biosynthetic process	3562	393	354.02	1.11011	0.0047	0.0763398
blue	GO:0007254	JNK cascade	146	25	14.51	1.72295	0.00473	0.0766741
blue	GO:0070302	regulation of stress-activated protein k...	131	23	13.02	1.76651	0.00481	0.0777386
blue	GO:0034453	microtubule anchoring	34	9	3.38	2.66272	0.00486	0.0783134
blue	GO:0031098	stress-activated protein kinase signalin...	193	31	19.18	1.61627	0.00487	0.0783969
blue	GO:0035265	organ growth	60	13	5.96	2.18121	0.00527	0.0825498
blue	GO:0070304	positive regulation of stress-activated ...	47	11	4.67	2.35546	0.0054	0.0843426
blue	GO:0043623	cellular protein complex assembly	292	43	29.02	1.48174	0.00547	0.0851907
blue	GO:0006281	DNA repair	393	55	39.06	1.40809	0.00551	0.0857316
blue	GO:0009056	catabolic process	1787	208	177.61	1.17111	0.00555	0.086025
blue	GO:0006893	Golgi to plasma membrane transport	29	8	2.88	2.77778	0.00595	0.0910115
blue	GO:0034613	cellular protein localization	917	114	91.14	1.25082	0.006	0.0914326
blue	GO:0006119	oxidative phosphorylation	61	13	6.06	2.14521	0.0061	0.0927827
blue	GO:0045005	maintenance of fidelity involved in DNA-...	13	5	1.29	3.87597	0.00626	0.0946854
blue	GO:0051383	kinetochore organization	13	5	1.29	3.87597	0.00626	0.0946854
blue	GO:1901222	regulation of NIK/NF-kappaB cascade	13	5	1.29	3.87597	0.00626	0.0946854
blue	GO:0010498	proteasomal protein catabolic process	245	37	24.35	1.51951	0.00636	0.0956645
blue	GO:0016236	macroautophagy	48	11	4.77	2.30608	0.00639	0.09585
blue	GO:0051171	regulation of nitrogen compound metaboli...	2925	326	290.71	1.12139	0.00652	0.0966421
blue	GO:0051225	spindle assembly	42	10	4.17	2.39808	0.0069	0.100535
blue	GO:0048489	synaptic vesicle transport	62	13	6.16	2.11039	0.00704	0.101971
blue	GO:0097480	establishment of synaptic vesicle locali...	62	13	6.16	2.11039	0.00704	0.101971
blue	GO:0051649	establishment of localization in cell	1608	188	159.82	1.17632	0.00706	0.101971
blue	GO:0070727	cellular macromolecule localization	922	114	91.64	1.244	0.0071	0.102168
blue	GO:0009889	regulation of biosynthetic process	2784	311	276.7	1.12396	0.00713	0.102509
blue	GO:0000186	activation of MAPKK activity	49	11	4.87	2.25873	0.00752	0.106703
blue	GO:0044238	primary metabolic process	7135	746	709.13	1.05199	0.00778	0.109722
blue	GO:0000910	cytokinesis	121	21	12.03	1.74564	0.00784	0.110377
blue	GO:0034641	cellular nitrogen compound metabolic pro...	4679	503	465.04	1.08163	0.00818	0.114176
blue	GO:0090304	nucleic acid metabolic process	3758	410	373.5	1.09772	0.0082	0.114357
blue	GO:0046620	regulation of organ growth	43	10	4.27	2.34192	0.00821	0.114399
blue	GO:0071704	organic substance metabolic process	7336	765	729.11	1.04922	0.00856	0.118063
blue	GO:0022011	myelination in peripheral nervous system	14	5	1.39	3.59712	0.00895	0.122097
blue	GO:0032292	peripheral nervous system axon ensheathm...	14	5	1.39	3.59712	0.00895	0.122097
blue	GO:0032506	cytokinetic process	14	5	1.39	3.59712	0.00895	0.122097
blue	GO:0051640	organelle localization	226	34	22.46	1.5138	0.00917	0.123955
blue	GO:0006468	protein phosphorylation	940	115	93.42	1.231	0.00946	0.126613
blue	GO:0019886	antigen processing and presentation of e...	79	15	7.85	1.91083	0.0102	0.133767
blue	GO:0032434	regulation of proteasomal ubiquitin-depe...	58	12	5.76	2.08333	0.01049	0.136908
blue	GO:0070925	organelle assembly	253	37	25.15	1.47117	0.01056	0.137381
blue	GO:1901360	organic cyclic compound metabolic proces...	4644	498	461.56	1.07895	0.01057	0.137402
blue	GO:0031326	regulation of cellular biosynthetic proc...	2765	307	274.81	1.11714	0.01061	0.137811
blue	GO:0034655	nucleobase-containing compound catabolic...	699	88	69.47	1.26673	0.01093	0.140639
blue	GO:0019637	organophosphate metabolic process	963	117	95.71	1.22244	0.01094	0.140639
blue	GO:0032147	activation of protein kinase activity	188	29	18.68	1.55246	0.011	0.141187
blue	GO:0007031	peroxisome organization	32	8	3.18	2.51572	0.01116	0.142295
blue	GO:0031669	cellular response to nutrient levels	102	18	10.14	1.77515	0.01117	0.142295
blue	GO:0009967	positive regulation of signal transducti...	655	83	65.1	1.27496	0.01132	0.143499
blue	GO:0030071	regulation of mitotic metaphase/anaphase...	45	10	4.47	2.23714	0.01139	0.143811
blue	GO:1902099	regulation of metaphase/anaphase transit...	45	10	4.47	2.23714	0.01139	0.143811
blue	GO:0080135	regulation of cellular response to stres...	288	41	28.62	1.43256	0.01153	0.144904
blue	GO:0051252	regulation of RNA metabolic process	2462	275	244.69	1.12387	0.01211	0.149765
blue	GO:0034067	protein localization to Golgi apparatus	15	5	1.49	3.3557	0.01234	0.151458
blue	GO:0048490	anterograde synaptic vesicle transport	15	5	1.49	3.3557	0.01234	0.151458
blue	GO:0006895	Golgi to endosome transport	10	4	0.99	4.0404	0.01248	0.152258
blue	GO:0043217	myelin maintenance	10	4	0.99	4.0404	0.01248	0.152258
blue	GO:0051382	kinetochore assembly	10	4	0.99	4.0404	0.01248	0.152258
blue	GO:0055057	neuroblast division	10	4	0.99	4.0404	0.01248	0.152258
blue	GO:0033157	regulation of intracellular protein tran...	150	24	14.91	1.60966	0.0128	0.154782
blue	GO:0072659	protein localization to plasma membrane	96	17	9.54	1.78197	0.01298	0.156365
blue	GO:0007091	metaphase/anaphase transition of mitotic...	46	10	4.57	2.18818	0.01329	0.158574
blue	GO:0044784	metaphase/anaphase transition of cell cy...	46	10	4.57	2.18818	0.01329	0.158574
blue	GO:0043087	regulation of GTPase activity	199	30	19.78	1.51668	0.0134	0.159419
blue	GO:0032480	negative regulation of type I interferon...	33	8	3.28	2.43902	0.01349	0.160022
blue	GO:0045861	negative regulation of proteolysis	33	8	3.28	2.43902	0.01349	0.160022
blue	GO:0023056	positive regulation of signaling	687	86	68.28	1.25952	0.01354	0.160264
blue	GO:0090100	positive regulation of transmembrane rec...	53	11	5.27	2.08729	0.01365	0.161332
blue	GO:0007033	vacuole organization	60	12	5.96	2.01342	0.0137	0.161571
blue	GO:0002495	antigen processing and presentation of p...	82	15	8.15	1.84049	0.01425	0.165891
blue	GO:0033554	cellular response to stress	1139	135	113.2	1.19258	0.0144	0.167161
blue	GO:0010647	positive regulation of cell communicatio...	690	86	68.58	1.25401	0.01503	0.172749
blue	GO:0032320	positive regulation of Ras GTPase activi...	90	16	8.94	1.78971	0.0151	0.173424
blue	GO:0033124	regulation of GTP catabolic process	201	30	19.98	1.5015	0.01529	0.174996
blue	GO:1901575	organic substance catabolic process	1602	184	159.22	1.15563	0.01533	0.175199
blue	GO:0019693	ribose phosphate metabolic process	547	70	54.37	1.28747	0.01549	0.17654
blue	GO:0002504	antigen processing and presentation of p...	83	15	8.25	1.81818	0.01585	0.179115
blue	GO:0009150	purine ribonucleotide metabolic process	530	68	52.68	1.29081	0.016	0.17971
blue	GO:2001141	regulation of RNA biosynthetic process	2399	267	238.43	1.11983	0.01606	0.180224
blue	GO:0032318	regulation of Ras GTPase activity	145	23	14.41	1.59611	0.01609	0.180224
blue	GO:0009950	dorsal/ventral axis specification	16	5	1.59	3.14465	0.01651	0.183413
blue	GO:0014044	Schwann cell development	16	5	1.59	3.14465	0.01651	0.183413
blue	GO:0006310	DNA recombination	194	29	19.28	1.50415	0.01656	0.183689
blue	GO:0010468	regulation of gene expression	2809	309	279.18	1.10681	0.01688	0.186505
blue	GO:0061136	regulation of proteasomal protein catabo...	69	13	6.86	1.89504	0.01715	0.188847
blue	GO:0018410	C-terminal protein amino acid modificati...	28	7	2.78	2.51799	0.01723	0.1896
blue	GO:0042176	regulation of protein catabolic process	154	24	15.31	1.5676	0.01734	0.190424
blue	GO:0010467	gene expression	3722	402	369.92	1.08672	0.01734	0.190424
blue	GO:0051651	maintenance of location in cell	99	17	9.84	1.72764	0.01736	0.190515
black	GO:0016126	sterol biosynthetic process	45	15	1.06	14.1509	4.8e-14	1.736e-11
black	GO:0006096	glycolysis	48	15	1.13	13.2743	1.4e-13	4.46765e-11
black	GO:0006695	cholesterol biosynthetic process	40	14	0.94	14.8936	1.6e-13	4.82222e-11
black	GO:0006007	glucose catabolic process	61	15	1.44	10.4167	7e-12	1.58229e-09
black	GO:0016125	sterol metabolic process	97	18	2.29	7.86026	9e-12	1.87163e-09
black	GO:0019320	hexose catabolic process	73	16	1.72	9.30233	9.2e-12	1.87163e-09
black	GO:0008203	cholesterol metabolic process	90	17	2.12	8.01887	2.6e-11	4.80852e-09
black	GO:0046365	monosaccharide catabolic process	78	16	1.84	8.69565	2.7e-11	4.93736e-09
black	GO:0006694	steroid biosynthetic process	101	16	2.38	6.72269	1.5e-09	2.08654e-07
black	GO:0044724	single-organism carbohydrate catabolic p...	106	16	2.5	6.4	3.2e-09	4.13333e-07
black	GO:0016052	carbohydrate catabolic process	108	16	2.55	6.27451	4.2e-09	5.29884e-07
black	GO:0046165	alcohol biosynthetic process	109	16	2.57	6.22568	4.9e-09	6.04148e-07
black	GO:0008202	steroid metabolic process	179	20	4.22	4.73934	7.5e-09	8.53584e-07
black	GO:1901617	organic hydroxy compound biosynthetic pr...	129	16	3.04	5.26316	5.7e-08	5.06926e-06
black	GO:0006091	generation of precursor metabolites and ...	338	26	7.97	3.26223	1.1e-07	8.73293e-06
black	GO:1901615	organic hydroxy compound metabolic proce...	321	25	7.57	3.30251	1.5e-07	1.15699e-05
black	GO:0006006	glucose metabolic process	175	18	4.13	4.35835	1.6e-07	1.1945e-05
black	GO:0044710	single-organism metabolic process	2453	94	57.86	1.62461	1.8e-07	1.32557e-05
black	GO:0006066	alcohol metabolic process	263	22	6.2	3.54839	2.6e-07	1.82392e-05
black	GO:0001666	response to hypoxia	183	18	4.32	4.16667	3.1e-07	2.07623e-05
black	GO:0036293	response to decreased oxygen levels	185	18	4.36	4.12844	3.6e-07	2.35301e-05
black	GO:0005996	monosaccharide metabolic process	226	20	5.33	3.75235	3.7e-07	2.38014e-05
black	GO:0019318	hexose metabolic process	208	19	4.91	3.86965	4.5e-07	2.79532e-05
black	GO:0044281	small molecule metabolic process	2053	81	48.42	1.67286	6.2e-07	3.76511e-05
black	GO:0070482	response to oxygen levels	195	18	4.6	3.91304	7.9e-07	4.65842e-05
black	GO:0008610	lipid biosynthetic process	449	29	10.59	2.73843	7.9e-07	4.65842e-05
black	GO:0006629	lipid metabolic process	878	44	20.71	2.12458	1.3e-06	7.02907e-05
black	GO:0036294	cellular response to decreased oxygen le...	73	10	1.72	5.81395	7.5e-06	0.000328125
black	GO:0071456	cellular response to hypoxia	73	10	1.72	5.81395	7.5e-06	0.000328125
black	GO:0071453	cellular response to oxygen levels	79	10	1.86	5.37634	1.5e-05	0.000582637
black	GO:0006094	gluconeogenesis	49	8	1.16	6.89655	1.7e-05	0.000651
black	GO:0044283	small molecule biosynthetic process	340	22	8.02	2.74314	1.8e-05	0.000686066
black	GO:0005975	carbohydrate metabolic process	642	33	15.14	2.17966	1.9e-05	0.000717459
black	GO:0006720	isoprenoid metabolic process	65	9	1.53	5.88235	2e-05	0.00075
black	GO:0044711	single-organism biosynthetic process	344	22	8.11	2.7127	2.1e-05	0.000783888
black	GO:0008283	cell proliferation	1174	50	27.69	1.80571	2.3e-05	0.000850739
black	GO:0042632	cholesterol homeostasis	39	7	0.92	7.6087	3e-05	0.00107781
black	GO:0019319	hexose biosynthetic process	53	8	1.25	6.4	3e-05	0.00107781
black	GO:0032501	multicellular organismal process	4078	128	96.19	1.3307	3.2e-05	0.00114211
black	GO:0055092	sterol homeostasis	40	7	0.94	7.44681	3.6e-05	0.00127647
black	GO:0048513	organ development	1783	67	42.05	1.59334	4.3e-05	0.0015115
black	GO:0001656	metanephros development	56	8	1.32	6.06061	4.6e-05	0.00160655
black	GO:0008299	isoprenoid biosynthetic process	18	5	0.42	11.9048	4.7e-05	0.00163796
black	GO:0044723	single-organism carbohydrate metabolic p...	472	26	11.13	2.33603	5e-05	0.00173507
black	GO:0044707	single-multicellular organism process	3962	124	93.45	1.32691	5.7e-05	0.00195712
black	GO:0070887	cellular response to chemical stimulus	1452	57	34.25	1.66423	5.8e-05	0.00198726
black	GO:0046364	monosaccharide biosynthetic process	58	8	1.37	5.83942	5.9e-05	0.00201728
black	GO:0042221	response to chemical stimulus	2170	77	51.18	1.50449	7e-05	0.00235382
black	GO:0032787	monocarboxylic acid metabolic process	321	20	7.57	2.64201	7.3e-05	0.0024446
black	GO:0050896	response to stimulus	4976	148	117.37	1.26097	8e-05	0.00265173
black	GO:0035336	long-chain fatty-acyl-CoA metabolic proc...	20	5	0.47	10.6383	8.1e-05	0.00267942
black	GO:0007267	cell-cell signaling	754	35	17.78	1.9685	8.7e-05	0.00287206
black	GO:0035384	thioester biosynthetic process	32	6	0.75	8	8.8e-05	0.00289333
black	GO:0071616	acyl-CoA biosynthetic process	32	6	0.75	8	8.8e-05	0.00289333
black	GO:0007623	circadian rhythm	62	8	1.46	5.47945	9.7e-05	0.00315735
black	GO:0006081	cellular aldehyde metabolic process	23	5	0.54	9.25926	0.00017	0.00513312
black	GO:0035337	fatty-acyl-CoA metabolic process	23	5	0.54	9.25926	0.00017	0.00513312
black	GO:0048511	rhythmic process	133	11	3.14	3.50318	0.0003	0.00846187
black	GO:0044767	single-organism developmental process	2723	89	64.23	1.38565	0.00032	0.00899482
black	GO:0035338	long-chain fatty-acyl-CoA biosynthetic p...	15	4	0.35	11.4286	0.00034	0.00945897
black	GO:0021675	nerve development	41	6	0.97	6.18557	0.00037	0.0101547
black	GO:0019216	regulation of lipid metabolic process	160	12	3.77	3.18302	0.0004	0.0108681
black	GO:0042127	regulation of cell proliferation	881	37	20.78	1.78056	0.0004	0.0108681
black	GO:0055088	lipid homeostasis	58	7	1.37	5.10949	0.0004	0.0108681
black	GO:0006641	triglyceride metabolic process	77	8	1.82	4.3956	0.00044	0.011778
black	GO:0006637	acyl-CoA metabolic process	59	7	1.39	5.03597	0.00045	0.0119669
black	GO:0035383	thioester metabolic process	59	7	1.39	5.03597	0.00045	0.0119669
black	GO:0061351	neural precursor cell proliferation	79	8	1.86	4.30108	0.00053	0.0137792
black	GO:0032502	developmental process	3426	106	80.81	1.31172	0.00053	0.0137792
black	GO:0046949	fatty-acyl-CoA biosynthetic process	17	4	0.4	10	0.00056	0.0143754
black	GO:0009605	response to external stimulus	930	38	21.94	1.732	0.00057	0.0145404
black	GO:0030900	forebrain development	215	14	5.07	2.76134	0.00057	0.0145404
black	GO:0048731	system development	2617	85	61.73	1.37696	0.00058	0.0147262
black	GO:0006639	acylglycerol metabolic process	81	8	1.91	4.18848	0.00063	0.0157985
black	GO:0008284	positive regulation of cell proliferatio...	465	23	10.97	2.09663	0.00064	0.015951
black	GO:0048856	anatomical structure development	3053	96	72.01	1.33315	0.00067	0.0165718
black	GO:0009628	response to abiotic stimulus	649	29	15.31	1.89419	0.00068	0.0167175
black	GO:0006638	neutral lipid metabolic process	82	8	1.93	4.14508	0.00068	0.0167175
black	GO:0021846	cell proliferation in forebrain	18	4	0.42	9.52381	0.00071	0.0173502
black	GO:0060445	branching involved in salivary gland mor...	18	4	0.42	9.52381	0.00071	0.0173502
black	GO:0043588	skin development	195	13	4.6	2.82609	0.00072	0.0175419
black	GO:0009719	response to endogenous stimulus	877	36	20.69	1.73997	0.00074	0.0179754
black	GO:0007275	multicellular organismal development	3024	95	71.33	1.33184	0.00075	0.0181641
black	GO:0019432	triglyceride biosynthetic process	47	6	1.11	5.40541	0.00078	0.0188346
black	GO:0006721	terpenoid metabolic process	49	6	1.16	5.17241	0.00097	0.0224244
black	GO:0046460	neutral lipid biosynthetic process	49	6	1.16	5.17241	0.00097	0.0224244
black	GO:0046463	acylglycerol biosynthetic process	49	6	1.16	5.17241	0.00097	0.0224244
black	GO:0006112	energy reserve metabolic process	130	10	3.07	3.25733	0.001	0.0228581
black	GO:0010033	response to organic substance	1588	56	37.46	1.49493	0.00108	0.0240781
black	GO:0090200	positive regulation of release of cytoch...	20	4	0.47	8.51064	0.00109	0.0242016
black	GO:0009888	tissue development	1037	40	24.46	1.63532	0.00124	0.0270161
black	GO:0016051	carbohydrate biosynthetic process	134	10	3.16	3.16456	0.00126	0.0272331
black	GO:0021545	cranial nerve development	21	4	0.5	8	0.00132	0.0283791
black	GO:0021602	cranial nerve morphogenesis	10	3	0.24	12.5	0.00138	0.0294744
black	GO:0097094	craniofacial suture morphogenesis	10	3	0.24	12.5	0.00138	0.0294744
black	GO:0030323	respiratory tube development	114	9	2.69	3.34572	0.00148	0.0314042
black	GO:0009725	response to hormone stimulus	497	23	11.72	1.96246	0.00156	0.0328873
black	GO:0007422	peripheral nervous system development	54	6	1.27	4.72441	0.00163	0.034098
black	GO:0003281	ventricular septum development	37	5	0.87	5.74713	0.00165	0.0343838
black	GO:0006357	regulation of transcription from RNA pol...	1022	39	24.11	1.61759	0.00175	0.0359612
black	GO:0046890	regulation of lipid biosynthetic process	74	7	1.75	4	0.00175	0.0359612
black	GO:0060349	bone morphogenesis	55	6	1.3	4.61538	0.00179	0.0366443
black	GO:0032922	circadian regulation of gene expression	11	3	0.26	11.5385	0.00186	0.0378394
black	GO:0072215	regulation of metanephros development	11	3	0.26	11.5385	0.00186	0.0378394
black	GO:0007519	skeletal muscle tissue development	166	11	3.92	2.80612	0.00191	0.0387114
black	GO:0000122	negative regulation of transcription fro...	416	20	9.81	2.03874	0.00202	0.0404373
black	GO:0006633	fatty acid biosynthetic process	97	8	2.29	3.49345	0.00203	0.0404881
black	GO:0050877	neurological system process	829	33	19.55	1.68798	0.00206	0.0410344
black	GO:0007405	neuroblast proliferation	39	5	0.92	5.43478	0.0021	0.0413738
black	GO:0045664	regulation of neuron differentiation	274	15	6.46	2.32198	0.00214	0.0418109
black	GO:0032870	cellular response to hormone stimulus	302	16	7.12	2.24719	0.00215	0.0418556
black	GO:0006732	coenzyme metabolic process	170	11	4.01	2.74314	0.00231	0.0442297
black	GO:0060538	skeletal muscle organ development	171	11	4.03	2.72953	0.00242	0.0461729
black	GO:0048483	autonomic nervous system development	25	4	0.59	6.77966	0.00259	0.0485066
black	GO:0048566	embryonic digestive tract development	25	4	0.59	6.77966	0.00259	0.0485066
black	GO:0044255	cellular lipid metabolic process	678	28	15.99	1.75109	0.0027	0.05022
black	GO:0048598	embryonic morphogenesis	367	18	8.66	2.07852	0.0027	0.05022
black	GO:0000003	reproduction	779	31	18.37	1.68753	0.00284	0.0524642
black	GO:0003008	system process	1157	42	27.29	1.53903	0.00295	0.0541888
black	GO:0007420	brain development	400	19	9.43	2.01485	0.00297	0.054372
black	GO:0022414	reproductive process	683	28	16.11	1.73805	0.003	0.0546141
black	GO:0060412	ventricular septum morphogenesis	26	4	0.61	6.55738	0.003	0.0546141
black	GO:0007530	sex determination	13	3	0.31	9.67742	0.00311	0.0563644
black	GO:0048565	digestive tract development	82	7	1.93	3.62694	0.00316	0.0570166
black	GO:0021536	diencephalon development	43	5	1.01	4.9505	0.00325	0.058253
black	GO:0045666	positive regulation of neuron differenti...	43	5	1.01	4.9505	0.00325	0.058253
black	GO:0071310	cellular response to organic substance	1199	43	28.28	1.52051	0.00329	0.0587758
black	GO:0045137	development of primary sexual characteri...	153	10	3.61	2.77008	0.00336	0.0598293
black	GO:0014070	response to organic cyclic compound	405	19	9.55	1.98953	0.0034	0.0602122
black	GO:0007435	salivary gland morphogenesis	27	4	0.64	6.25	0.00346	0.0608773
black	GO:0072210	metanephric nephron development	27	4	0.64	6.25	0.00346	0.0608773
black	GO:0019637	organophosphate metabolic process	963	36	22.71	1.5852	0.00373	0.0647874
black	GO:0071495	cellular response to endogenous stimulus	629	26	14.84	1.75202	0.00377	0.0654123
black	GO:0033993	response to lipid	379	18	8.94	2.01342	0.0038	0.0656529
black	GO:0097305	response to alcohol	156	10	3.68	2.71739	0.00386	0.0664075
black	GO:0006740	NADPH regeneration	14	3	0.33	9.09091	0.00389	0.0665018
black	GO:0010894	negative regulation of steroid biosynthe...	14	3	0.33	9.09091	0.00389	0.0665018
black	GO:0042474	middle ear morphogenesis	14	3	0.33	9.09091	0.00389	0.0665018
black	GO:0045686	negative regulation of glial cell differ...	14	3	0.33	9.09091	0.00389	0.0665018
black	GO:0045939	negative regulation of steroid metabolic...	14	3	0.33	9.09091	0.00389	0.0665018
black	GO:0007610	behavior	380	18	8.96	2.00893	0.00391	0.0666338
black	GO:0051055	negative regulation of lipid biosyntheti...	28	4	0.66	6.06061	0.00397	0.0673039
black	GO:0090199	regulation of release of cytochrome c fr...	28	4	0.66	6.06061	0.00397	0.0673039
black	GO:0010822	positive regulation of mitochondrion org...	45	5	1.06	4.71698	0.00397	0.0673039
black	GO:0008406	gonad development	132	9	3.11	2.89389	0.00401	0.0678407
black	GO:1901700	response to oxygen-containing compound	767	30	18.09	1.65837	0.00426	0.0707464
black	GO:0055123	digestive system development	87	7	2.05	3.41463	0.0044	0.0728484
black	GO:0007417	central nervous system development	541	23	12.76	1.80251	0.00453	0.0741708
black	GO:0014706	striated muscle tissue development	268	14	6.32	2.21519	0.00453	0.0741708
black	GO:0050767	regulation of neurogenesis	327	16	7.71	2.07523	0.00469	0.0762535
black	GO:0030324	lung development	111	8	2.62	3.05344	0.00469	0.0762535
black	GO:0072001	renal system development	187	11	4.41	2.49433	0.00479	0.0774923
black	GO:0065008	regulation of biological quality	2225	70	52.48	1.33384	0.00492	0.0788897
black	GO:0007626	locomotory behavior	112	8	2.64	3.0303	0.00495	0.0792146
black	GO:0048608	reproductive structure development	188	11	4.43	2.48307	0.00498	0.0793825
black	GO:0002009	morphogenesis of an epithelium	300	15	7.08	2.11864	0.00502	0.0798636
black	GO:0003382	epithelial cell morphogenesis	30	4	0.71	5.6338	0.00512	0.080666
black	GO:0007431	salivary gland development	30	4	0.71	5.6338	0.00512	0.080666
black	GO:0061458	reproductive system development	189	11	4.46	2.46637	0.00518	0.0814536
black	GO:0060348	bone development	90	7	2.12	3.30189	0.0053	0.0829399
black	GO:0051716	cellular response to stimulus	4034	115	95.15	1.20862	0.00638	0.0957883
black	GO:0060537	muscle tissue development	279	14	6.58	2.12766	0.00642	0.0962113
black	GO:0050810	regulation of steroid biosynthetic proce...	32	4	0.75	5.33333	0.00647	0.0964004
black	GO:0090183	regulation of kidney development	32	4	0.75	5.33333	0.00647	0.0964004
black	GO:0035914	skeletal muscle cell differentiation	71	6	1.67	3.59281	0.00647	0.0964004
black	GO:0019226	transmission of nerve impulse	558	23	13.16	1.74772	0.00654	0.0968503
black	GO:0048562	embryonic organ morphogenesis	169	10	3.99	2.50627	0.00674	0.0991804
black	GO:0021700	developmental maturation	143	9	3.37	2.67062	0.00674	0.0991804
black	GO:0010518	positive regulation of phospholipase act...	51	5	1.2	4.16667	0.00681	0.10003
black	GO:0030325	adrenal gland development	17	3	0.4	7.5	0.0069	0.100535
black	GO:0044262	cellular carbohydrate metabolic process	170	10	4.01	2.49377	0.00702	0.101971
black	GO:0044708	single-organism behavior	253	13	5.97	2.17755	0.00702	0.101971
black	GO:0043618	regulation of transcription from RNA pol...	33	4	0.78	5.12821	0.00723	0.103764
black	GO:0048732	gland development	198	11	4.67	2.35546	0.00729	0.104349
black	GO:0042471	ear morphogenesis	73	6	1.72	3.48837	0.0074	0.10546
black	GO:0003279	cardiac septum development	52	5	1.23	4.06504	0.0074	0.10546
black	GO:0034754	cellular hormone metabolic process	52	5	1.23	4.06504	0.0074	0.10546
black	GO:2000026	regulation of multicellular organismal d...	867	32	20.45	1.56479	0.00746	0.106129
black	GO:0009887	organ morphogenesis	532	22	12.55	1.75299	0.00748	0.106321
black	GO:0016331	morphogenesis of embryonic epithelium	121	8	2.85	2.80702	0.00783	0.110332
black	GO:0035272	exocrine system development	34	4	0.8	5	0.00804	0.112803
black	GO:0034405	response to fluid shear stress	18	3	0.42	7.14286	0.00814	0.113715
black	GO:0060429	epithelium development	570	23	13.44	1.71131	0.00836	0.115973
black	GO:0035107	appendage morphogenesis	98	7	2.31	3.0303	0.00838	0.115973
black	GO:0035108	limb morphogenesis	98	7	2.31	3.0303	0.00838	0.115973
black	GO:0045944	positive regulation of transcription fro...	538	22	12.69	1.73365	0.00848	0.117059
black	GO:1901701	cellular response to oxygen-containing c...	507	21	11.96	1.75585	0.00873	0.120204
black	GO:0048705	skeletal system morphogenesis	124	8	2.92	2.73973	0.00902	0.122774
black	GO:0001822	kidney development	150	9	3.54	2.54237	0.00911	0.123246
black	GO:0010243	response to organonitrogen compound	478	20	11.27	1.77462	0.00936	0.125896
black	GO:0007517	muscle organ development	292	14	6.89	2.03193	0.00941	0.126048
black	GO:1901698	response to nitrogen compound	511	21	12.05	1.74274	0.0095	0.126628
black	GO:0014014	negative regulation of gliogenesis	19	3	0.45	6.66667	0.0095	0.126628
black	GO:0048710	regulation of astrocyte differentiation	19	3	0.45	6.66667	0.0095	0.126628
black	GO:0007548	sex differentiation	178	10	4.2	2.38095	0.00956	0.127323
black	GO:0010001	glial cell differentiation	101	7	2.38	2.94118	0.00982	0.12983
black	GO:0070371	ERK1 and ERK2 cascade	101	7	2.38	2.94118	0.00982	0.12983
black	GO:0048878	chemical homeostasis	481	20	11.35	1.76211	0.00998	0.131731
black	GO:0060193	positive regulation of lipase activity	56	5	1.32	3.78788	0.01008	0.132836
black	GO:0035270	endocrine system development	78	6	1.84	3.26087	0.01013	0.13335
pink	GO:0009653	anatomical structure morphogenesis	1612	85	28.15	3.01954	2.7e-23	2.74641e-20
pink	GO:0072358	cardiovascular system development	627	49	10.95	4.47489	1.4e-19	1.03568e-16
pink	GO:0072359	circulatory system development	627	49	10.95	4.47489	1.4e-19	1.03568e-16
pink	GO:0044707	single-multicellular organism process	3962	129	69.2	1.86416	1.4e-18	9.90652e-16
pink	GO:0032501	multicellular organismal process	4078	130	71.22	1.82533	5.9e-18	3.8409e-15
pink	GO:0048731	system development	2617	100	45.71	2.18771	1.5e-17	9.38942e-15
pink	GO:0048646	anatomical structure formation involved ...	679	48	11.86	4.04722	2.2e-17	1.27875e-14
pink	GO:0048513	organ development	1783	79	31.14	2.53693	1e-16	5.425e-14
pink	GO:0007275	multicellular organismal development	3024	107	52.81	2.02613	1.3e-16	6.825e-14
pink	GO:0048856	anatomical structure development	3053	107	53.32	2.00675	2.6e-16	1.32234e-13
pink	GO:0044767	single-organism developmental process	2723	100	47.56	2.10261	2.7e-16	1.33159e-13
pink	GO:0009887	organ morphogenesis	532	41	9.29	4.41335	3.8e-16	1.81897e-13
pink	GO:0009888	tissue development	1037	57	18.11	3.14743	1.1e-15	4.83851e-13
pink	GO:0048729	tissue morphogenesis	371	33	6.48	5.09259	7.2e-15	3.00462e-12
pink	GO:0001944	vasculature development	414	34	7.23	4.70263	2.9e-14	1.12375e-11
pink	GO:0009790	embryo development	726	45	12.68	3.5489	3.6e-14	1.33159e-11
pink	GO:0032502	developmental process	3426	110	59.83	1.83854	5e-14	1.76902e-11
pink	GO:0001525	angiogenesis	286	28	4.99	5.61122	9.1e-14	3.0225e-11
pink	GO:0001568	blood vessel development	395	32	6.9	4.63768	2.6e-13	7.69364e-11
pink	GO:2000026	regulation of multicellular organismal d...	867	48	15.14	3.17041	2.9e-13	8.28026e-11
pink	GO:0048514	blood vessel morphogenesis	347	30	6.06	4.9505	3e-13	8.4181e-11
pink	GO:0042127	regulation of cell proliferation	881	48	15.39	3.11891	5.3e-13	1.41406e-10
pink	GO:0060429	epithelium development	570	38	9.95	3.8191	5.5e-13	1.44375e-10
pink	GO:0007492	endoderm development	46	13	0.8	16.25	5.8e-13	1.49833e-10
pink	GO:0050793	regulation of developmental process	1143	55	19.96	2.75551	1.1e-12	2.79727e-10
pink	GO:0051239	regulation of multicellular organismal p...	1412	62	24.66	2.51419	1.4e-12	3.50538e-10
pink	GO:0042221	response to chemical stimulus	2170	80	37.9	2.11082	2.1e-12	5.17841e-10
pink	GO:0008283	cell proliferation	1174	55	20.5	2.68293	3.3e-12	8.01604e-10
pink	GO:0050896	response to stimulus	4976	134	86.91	1.54182	5e-12	1.17935e-09
pink	GO:0030198	extracellular matrix organization	245	24	4.28	5.60748	6.1e-12	1.41825e-09
pink	GO:0043062	extracellular structure organization	246	24	4.3	5.5814	6.7e-12	1.53581e-09
pink	GO:0048598	embryonic morphogenesis	367	29	6.41	4.52418	7.3e-12	1.6275e-09
pink	GO:0023052	signaling	3672	110	64.13	1.71527	7.8e-12	1.69174e-09
pink	GO:0044700	single organism signaling	3672	110	64.13	1.71527	7.8e-12	1.69174e-09
pink	GO:0007166	cell surface receptor signaling pathway	1793	70	31.31	2.23571	7.9e-12	1.69174e-09
pink	GO:0001706	endoderm formation	26	10	0.45	22.2222	8.7e-12	1.83886e-09
pink	GO:0009611	response to wounding	751	42	13.12	3.20122	9.2e-12	1.87163e-09
pink	GO:0007369	gastrulation	113	17	1.97	8.62944	9.5e-12	1.90537e-09
pink	GO:0007165	signal transduction	3285	102	57.37	1.77793	1.2e-11	2.325e-09
pink	GO:0002009	morphogenesis of an epithelium	300	26	5.24	4.96183	1.2e-11	2.325e-09
pink	GO:0007154	cell communication	3761	111	65.69	1.68975	1.6e-11	3.02791e-09
pink	GO:0022603	regulation of anatomical structure morph...	488	33	8.52	3.87324	1.6e-11	3.02791e-09
pink	GO:0048568	embryonic organ development	263	24	4.59	5.22876	2.8e-11	5.00769e-09
pink	GO:0045165	cell fate commitment	139	18	2.43	7.40741	3e-11	5.30707e-09
pink	GO:0035295	tube development	341	27	5.96	4.5302	4e-11	7e-09
pink	GO:0051716	cellular response to stimulus	4034	115	70.45	1.63236	4.7e-11	8.05184e-09
pink	GO:0048585	negative regulation of response to stimu...	694	39	12.12	3.21782	5.1e-11	8.64609e-09
pink	GO:0001501	skeletal system development	274	24	4.79	5.01044	6.6e-11	1.10737e-08
pink	GO:0048583	regulation of response to stimulus	1979	72	34.56	2.08333	1e-10	1.66071e-08
pink	GO:0007507	heart development	330	25	5.76	4.34028	5.7e-10	8.75165e-08
pink	GO:0072001	renal system development	187	19	3.27	5.8104	6e-10	9.12617e-08
pink	GO:0003006	developmental process involved in reprod...	306	24	5.34	4.49438	6.4e-10	9.64444e-08
pink	GO:0035270	endocrine system development	78	13	1.36	9.55882	7.7e-10	1.12899e-07
pink	GO:0009966	regulation of signal transduction	1559	60	27.23	2.20345	8.9e-10	1.29328e-07
pink	GO:0001655	urogenital system development	214	20	3.74	5.34759	9.1e-10	1.31064e-07
pink	GO:0007389	pattern specification process	290	23	5.06	4.54545	1.2e-09	1.71316e-07
pink	GO:0061138	morphogenesis of a branching epithelium	134	16	2.34	6.83761	1.3e-09	1.83978e-07
pink	GO:0051094	positive regulation of developmental pro...	520	31	9.08	3.4141	1.6e-09	2.20678e-07
pink	GO:0040011	locomotion	962	44	16.8	2.61905	1.9e-09	2.59853e-07
pink	GO:0001763	morphogenesis of a branching structure	140	16	2.45	6.53061	2.6e-09	3.46844e-07
pink	GO:0043009	chordate embryonic development	443	28	7.74	3.61757	3e-09	3.906e-07
pink	GO:0009792	embryo development ending in birth or eg...	448	28	7.82	3.58056	3.9e-09	4.95879e-07
pink	GO:0048608	reproductive structure development	188	18	3.28	5.4878	4.5e-09	5.63365e-07
pink	GO:0061458	reproductive system development	189	18	3.3	5.45455	4.9e-09	6.04148e-07
pink	GO:0010033	response to organic substance	1588	59	27.73	2.12766	5.1e-09	6.19422e-07
pink	GO:0043627	response to estrogen stimulus	93	13	1.62	8.02469	7.2e-09	8.43022e-07
pink	GO:0046903	secretion	586	32	10.23	3.12805	7.3e-09	8.48625e-07
pink	GO:0035239	tube morphogenesis	243	20	4.24	4.71698	8.3e-09	9.25223e-07
pink	GO:0030855	epithelial cell differentiation	349	24	6.1	3.93443	8.9e-09	9.78699e-07
pink	GO:0006928	cellular component movement	1128	47	19.7	2.38579	9.4e-09	1.02674e-06
pink	GO:0042060	wound healing	467	28	8.16	3.43137	9.7e-09	1.05245e-06
pink	GO:0033993	response to lipid	379	25	6.62	3.77644	9.8e-09	1.05626e-06
pink	GO:0023051	regulation of signaling	1745	62	30.48	2.03412	1e-08	1.06373e-06
pink	GO:0010646	regulation of cell communication	1748	62	30.53	2.03079	1.1e-08	1.155e-06
pink	GO:0009968	negative regulation of signal transducti...	597	32	10.43	3.06807	1.1e-08	1.155e-06
pink	GO:0048754	branching morphogenesis of an epithelial...	115	14	2.01	6.96517	1.2e-08	1.24395e-06
pink	GO:0048545	response to steroid hormone stimulus	183	17	3.2	5.3125	1.9e-08	1.93266e-06
pink	GO:0060562	epithelial tube morphogenesis	232	19	4.05	4.69136	2.2e-08	2.17e-06
pink	GO:0001704	formation of primary germ layer	68	11	1.19	9.2437	2.2e-08	2.17e-06
pink	GO:0023057	negative regulation of signaling	616	32	10.76	2.97398	2.4e-08	2.35301e-06
pink	GO:0010648	negative regulation of cell communicatio...	619	32	10.81	2.96022	2.7e-08	2.61563e-06
pink	GO:0023056	positive regulation of signaling	687	34	12	2.83333	2.7e-08	2.61563e-06
pink	GO:0070887	cellular response to chemical stimulus	1452	54	25.36	2.12934	2.9e-08	2.79275e-06
pink	GO:0010647	positive regulation of cell communicatio...	690	34	12.05	2.82158	3.1e-08	2.95044e-06
pink	GO:0016477	cell migration	659	33	11.51	2.86707	3.4e-08	3.21715e-06
pink	GO:0014070	response to organic cyclic compound	405	25	7.07	3.53607	3.7e-08	3.48078e-06
pink	GO:0009719	response to endogenous stimulus	877	39	15.32	2.54569	4.1e-08	3.79134e-06
pink	GO:0001657	ureteric bud development	72	11	1.26	8.73016	4.1e-08	3.79134e-06
pink	GO:0016055	Wnt receptor signaling pathway	268	20	4.68	4.2735	4.4e-08	4.04576e-06
pink	GO:0045597	positive regulation of cell differentiat...	381	24	6.65	3.60902	4.8e-08	4.38876e-06
pink	GO:0003007	heart morphogenesis	150	15	2.62	5.72519	5.1e-08	4.63701e-06
pink	GO:0009952	anterior/posterior pattern specification	129	14	2.25	6.22222	5.2e-08	4.70167e-06
pink	GO:0051093	negative regulation of developmental pro...	415	25	7.25	3.44828	5.9e-08	5.21861e-06
pink	GO:0010470	regulation of gastrulation	22	7	0.38	18.4211	6.1e-08	5.28072e-06
pink	GO:0048870	cell motility	710	34	12.4	2.74194	6.1e-08	5.28072e-06
pink	GO:0051674	localization of cell	710	34	12.4	2.74194	6.1e-08	5.28072e-06
pink	GO:0009605	response to external stimulus	930	40	16.24	2.46305	6.6e-08	5.65342e-06
pink	GO:0007423	sensory organ development	302	21	5.27	3.98482	6.7e-08	5.70903e-06
pink	GO:0023019	signal transduction involved in regulati...	14	6	0.24	25	7e-08	5.93359e-06
pink	GO:0007548	sex differentiation	178	16	3.11	5.14469	8.2e-08	6.91477e-06
pink	GO:0003002	regionalization	203	17	3.55	4.78873	9e-08	7.55026e-06
pink	GO:0030155	regulation of cell adhesion	228	18	3.98	4.52261	9.2e-08	7.67846e-06
pink	GO:0035051	cardiocyte differentiation	78	11	1.36	8.08824	9.7e-08	7.97311e-06
pink	GO:0009967	positive regulation of signal transducti...	655	32	11.44	2.7972	1e-07	8.1375e-06
pink	GO:0007420	brain development	400	24	6.99	3.43348	1.2e-07	9.48058e-06
pink	GO:0045765	regulation of angiogenesis	119	13	2.08	6.25	1.5e-07	1.15699e-05
pink	GO:0048522	positive regulation of cellular process	2528	76	44.15	1.7214	1.7e-07	1.25761e-05
pink	GO:0001701	in utero embryonic development	293	20	5.12	3.90625	1.9e-07	1.38666e-05
pink	GO:0007399	nervous system development	1410	51	24.63	2.07065	2e-07	1.44027e-05
pink	GO:0007167	enzyme linked receptor protein signaling...	752	34	13.13	2.58949	2.4e-07	1.70568e-05
pink	GO:0022414	reproductive process	683	32	11.93	2.68231	2.6e-07	1.82392e-05
pink	GO:0065008	regulation of biological quality	2225	69	38.86	1.7756	2.7e-07	1.86989e-05
pink	GO:0071363	cellular response to growth factor stimu...	514	27	8.98	3.00668	2.8e-07	1.92278e-05
pink	GO:0022610	biological adhesion	722	33	12.61	2.61697	2.9e-07	1.9584e-05
pink	GO:0048738	cardiac muscle tissue development	106	12	1.85	6.48649	3e-07	2.01756e-05
pink	GO:0048468	cell development	1226	46	21.41	2.14853	3.3e-07	2.19214e-05
pink	GO:0048518	positive regulation of biological proces...	2813	81	49.13	1.64869	3.4e-07	2.24028e-05
pink	GO:0048732	gland development	198	16	3.46	4.62428	3.6e-07	2.35301e-05
pink	GO:0009306	protein secretion	108	12	1.89	6.34921	3.7e-07	2.38014e-05
pink	GO:0061061	muscle structure development	395	23	6.9	3.33333	3.8e-07	2.43484e-05
pink	GO:0070848	response to growth factor stimulus	523	27	9.13	2.95728	3.9e-07	2.47939e-05
pink	GO:0060537	muscle tissue development	279	19	4.87	3.90144	4e-07	2.53307e-05
pink	GO:0071310	cellular response to organic substance	1199	45	20.94	2.149	4.6e-07	2.84658e-05
pink	GO:1901342	regulation of vasculature development	132	13	2.31	5.62771	4.9e-07	3.00934e-05
pink	GO:0048523	negative regulation of cellular process	2401	72	41.93	1.71715	5e-07	3.05921e-05
pink	GO:0065007	biological regulation	6867	152	119.93	1.26741	5.1e-07	3.10871e-05
pink	GO:0060389	pathway-restricted SMAD protein phosphor...	30	7	0.52	13.4615	6.4e-07	3.87212e-05
pink	GO:0050708	regulation of protein secretion	75	10	1.31	7.63359	6.5e-07	3.91806e-05
pink	GO:0032989	cellular component morphogenesis	862	36	15.05	2.39203	7e-07	4.18842e-05
pink	GO:0007517	muscle organ development	292	19	5.1	3.72549	8.1e-07	4.725e-05
pink	GO:0050878	regulation of body fluid levels	444	24	7.75	3.09677	8.1e-07	4.725e-05
pink	GO:0055024	regulation of cardiac muscle tissue deve...	31	7	0.54	12.963	8.2e-07	4.76625e-05
pink	GO:0007155	cell adhesion	720	32	12.57	2.54574	8.5e-07	4.92304e-05
pink	GO:0010740	positive regulation of intracellular pro...	383	22	6.69	3.28849	8.8e-07	5.06078e-05
pink	GO:0008285	negative regulation of cell proliferatio...	416	23	7.27	3.16369	9.5e-07	5.3872e-05
pink	GO:0044699	single-organism process	8160	170	142.51	1.1929	1e-06	5.57363e-05
pink	GO:0014706	striated muscle tissue development	268	18	4.68	3.84615	1e-06	5.57363e-05
pink	GO:0071772	response to BMP stimulus	12	5	0.21	23.8095	1.1e-06	5.9675e-05
pink	GO:0071773	cellular response to BMP stimulus	12	5	0.21	23.8095	1.1e-06	5.9675e-05
pink	GO:0030334	regulation of cell migration	328	20	5.73	3.4904	1.1e-06	5.9675e-05
pink	GO:0048519	negative regulation of biological proces...	2609	75	45.57	1.64582	1.4e-06	7.5447e-05
pink	GO:0048863	stem cell differentiation	220	16	3.84	4.16667	1.5e-06	8.0041e-05
pink	GO:0045595	regulation of cell differentiation	815	34	14.23	2.38932	1.6e-06	8.45455e-05
pink	GO:0030154	cell differentiation	2051	63	35.82	1.75879	1.7e-06	8.95388e-05
pink	GO:0050789	regulation of biological process	6464	144	112.89	1.27558	2e-06	0.000103662
pink	GO:0048869	cellular developmental process	2210	66	38.6	1.70984	2.3e-06	0.000117712
pink	GO:0007596	blood coagulation	375	21	6.55	3.20611	2.4e-06	0.000122063
pink	GO:0007417	central nervous system development	541	26	9.45	2.75132	2.5e-06	0.000126359
pink	GO:0031016	pancreas development	51	8	0.89	8.98876	2.5e-06	0.000126359
pink	GO:0007599	hemostasis	377	21	6.58	3.19149	2.6e-06	0.000131006
pink	GO:0045137	development of primary sexual characteri...	153	13	2.67	4.86891	2.7e-06	0.000134381
pink	GO:0050817	coagulation	378	21	6.6	3.18182	2.7e-06	0.000134381
pink	GO:0050794	regulation of cellular process	6184	139	108	1.28704	2.9e-06	0.000143895
pink	GO:0006950	response to stress	2322	68	40.55	1.67694	3.1e-06	0.000152886
pink	GO:2000145	regulation of cell motility	350	20	6.11	3.27332	3.1e-06	0.000152886
pink	GO:0032940	secretion by cell	515	25	8.99	2.78087	3.3e-06	0.000162258
pink	GO:0000904	cell morphogenesis involved in different...	585	27	10.22	2.64188	3.4e-06	0.000166672
pink	GO:0048584	positive regulation of response to stimu...	923	36	16.12	2.23325	3.5e-06	0.000170037
pink	GO:0048566	embryonic digestive tract development	25	6	0.44	13.6364	3.5e-06	0.000170037
pink	GO:0060038	cardiac muscle cell proliferation	25	6	0.44	13.6364	3.5e-06	0.000170037
pink	GO:0016202	regulation of striated muscle tissue dev...	90	10	1.57	6.36943	3.6e-06	0.000173858
pink	GO:0061053	somite development	54	8	0.94	8.51064	3.9e-06	0.000187235
pink	GO:0048634	regulation of muscle organ development	91	10	1.59	6.28931	3.9e-06	0.000187235
pink	GO:0001711	endodermal cell fate commitment	15	5	0.26	19.2308	4e-06	0.000191471
pink	GO:0060070	canonical Wnt receptor signaling pathway	159	13	2.78	4.67626	4.1e-06	0.00019511
pink	GO:0051240	positive regulation of multicellular org...	388	21	6.78	3.09735	4.1e-06	0.00019511
pink	GO:1901861	regulation of muscle tissue development	92	10	1.61	6.21118	4.4e-06	0.000206965
pink	GO:0051146	striated muscle cell differentiation	212	15	3.7	4.05405	4.4e-06	0.000206965
pink	GO:0014855	striated muscle cell proliferation	26	6	0.45	13.3333	4.5e-06	0.000210453
pink	GO:0060393	regulation of pathway-restricted SMAD pr...	26	6	0.45	13.3333	4.5e-06	0.000210453
pink	GO:0000003	reproduction	779	32	13.61	2.35121	4.6e-06	0.000214513
pink	GO:0042493	response to drug	242	16	4.23	3.78251	5.1e-06	0.000236474
pink	GO:0061448	connective tissue development	138	12	2.41	4.97925	5.1e-06	0.000236474
pink	GO:0010628	positive regulation of gene expression	861	34	15.04	2.26064	5.2e-06	0.000240426
pink	GO:0030900	forebrain development	215	15	3.75	4	5.3e-06	0.000243665
pink	GO:0022008	neurogenesis	940	36	16.42	2.19245	5.3e-06	0.000243665
pink	GO:0042692	muscle cell differentiation	272	17	4.75	3.57895	5.4e-06	0.000247563
pink	GO:0040007	growth	602	27	10.51	2.56898	5.7e-06	0.000260583
pink	GO:0051270	regulation of cellular component movemen...	397	21	6.93	3.0303	5.8e-06	0.000262939
pink	GO:0060675	ureteric bud morphogenesis	41	7	0.72	9.72222	6e-06	0.000269751
pink	GO:0010627	regulation of intracellular protein kina...	574	26	10.02	2.59481	7.3e-06	0.000321972
pink	GO:0040012	regulation of locomotion	371	20	6.48	3.08642	7.4e-06	0.0003255
pink	GO:0060485	mesenchyme development	120	11	2.1	5.2381	7.7e-06	0.000335972
pink	GO:0048562	embryonic organ morphogenesis	169	13	2.95	4.40678	8e-06	0.0003472
pink	GO:0010002	cardioblast differentiation	17	5	0.3	16.6667	8.1e-06	0.000349675
pink	GO:0033631	cell-cell adhesion mediated by integrin	17	5	0.3	16.6667	8.1e-06	0.000349675
pink	GO:0001708	cell fate specification	43	7	0.75	9.33333	8.4e-06	0.000360712
pink	GO:0055017	cardiac muscle tissue growth	29	6	0.51	11.7647	8.9e-06	0.000378192
pink	GO:0060425	lung morphogenesis	29	6	0.51	11.7647	8.9e-06	0.000378192
pink	GO:1901700	response to oxygen-containing compound	767	31	13.4	2.31343	9.2e-06	0.000388909
pink	GO:0009880	embryonic pattern specification	44	7	0.77	9.09091	9.9e-06	0.000410985
pink	GO:0032879	regulation of localization	1131	40	19.75	2.02532	1e-05	0.000410985
pink	GO:0009798	axis specification	61	8	1.07	7.47664	1e-05	0.000410985
pink	GO:0055007	cardiac muscle cell differentiation	61	8	1.07	7.47664	1e-05	0.000410985
pink	GO:0006954	inflammatory response	285	17	4.98	3.41365	1e-05	0.000410985
pink	GO:0035987	endodermal cell differentiation	18	5	0.31	16.129	1.1e-05	0.000445336
pink	GO:0060043	regulation of cardiac muscle cell prolif...	18	5	0.31	16.129	1.1e-05	0.000445336
pink	GO:0022407	regulation of cell-cell adhesion	62	8	1.08	7.40741	1.1e-05	0.000445336
pink	GO:0000902	cell morphogenesis	816	32	14.25	2.24561	1.2e-05	0.000481034
pink	GO:0001822	kidney development	150	12	2.62	4.58015	1.2e-05	0.000481034
green	GO:0006415	translational termination	89	65	2.87	22.6481	< 1e-30	NA
green	GO:0006414	translational elongation	103	66	3.32	19.8795	< 1e-30	NA
green	GO:0006614	SRP-dependent cotranslational protein ta...	103	65	3.32	19.5783	< 1e-30	NA
green	GO:0006613	cotranslational protein targeting to mem...	105	65	3.38	19.2308	< 1e-30	NA
green	GO:0045047	protein targeting to ER	106	65	3.42	19.0058	< 1e-30	NA
green	GO:0000184	nuclear-transcribed mRNA catabolic proce...	116	67	3.74	17.9144	< 1e-30	NA
green	GO:0072599	establishment of protein localization to...	107	65	3.45	18.8406	< 1e-30	NA
green	GO:0006413	translational initiation	148	72	4.77	15.0943	< 1e-30	NA
green	GO:0070972	protein localization to endoplasmic reti...	118	65	3.8	17.1053	< 1e-30	NA
green	GO:0019083	viral transcription	144	69	4.64	14.8707	< 1e-30	NA
green	GO:0019080	viral genome expression	154	69	4.96	13.9113	< 1e-30	NA
green	GO:0043624	cellular protein complex disassembly	153	68	4.93	13.7931	< 1e-30	NA
green	GO:0043241	protein complex disassembly	157	68	5.06	13.4387	< 1e-30	NA
green	GO:0006612	protein targeting to membrane	151	67	4.87	13.7577	< 1e-30	NA
green	GO:0032984	macromolecular complex disassembly	178	71	5.74	12.3693	< 1e-30	NA
green	GO:0000956	nuclear-transcribed mRNA catabolic proce...	176	69	5.67	12.1693	< 1e-30	NA
green	GO:0006402	mRNA catabolic process	188	69	6.06	11.3861	< 1e-30	NA
green	GO:0019058	viral infectious cycle	226	73	7.28	10.0275	< 1e-30	NA
green	GO:0090150	establishment of protein localization to...	209	70	6.74	10.3858	< 1e-30	NA
green	GO:0006401	RNA catabolic process	213	70	6.86	10.2041	< 1e-30	NA
green	GO:0072657	protein localization to membrane	257	72	8.28	8.69565	< 1e-30	NA
green	GO:0022411	cellular component disassembly	347	80	11.18	7.15564	< 1e-30	NA
green	GO:0072594	establishment of protein localization to...	401	79	12.92	6.11455	< 1e-30	NA
green	GO:0006412	translation	455	83	14.66	5.66166	< 1e-30	NA
green	GO:0006605	protein targeting	440	78	14.18	5.50071	< 1e-30	NA
green	GO:0033365	protein localization to organelle	492	81	15.86	5.10719	< 1e-30	NA
green	GO:0016032	viral process	606	87	19.53	4.45469	< 1e-30	NA
green	GO:0044764	multi-organism cellular process	608	87	19.6	4.43878	< 1e-30	NA
green	GO:0016071	mRNA metabolic process	594	86	19.14	4.49321	< 1e-30	NA
green	GO:0044403	symbiosis, encompassing mutualism throug...	635	87	20.47	4.25012	< 1e-30	NA
green	GO:0044419	interspecies interaction between organis...	635	87	20.47	4.25012	< 1e-30	NA
green	GO:0006886	intracellular protein transport	655	85	21.11	4.02653	6.1e-30	7.0525e-26
green	GO:0016044	cellular membrane organization	630	83	20.3	4.08867	1.1e-29	7.0525e-26
green	GO:0061024	membrane organization	631	83	20.34	4.08063	1.3e-29	7.0525e-26
green	GO:0016482	cytoplasmic transport	686	86	22.11	3.88964	3.4e-29	1.38338e-25
green	GO:0034655	nucleobase-containing compound catabolic...	699	85	22.53	3.77275	7.1e-28	2.31105e-24
green	GO:0044265	cellular macromolecule catabolic process	690	84	22.24	3.77698	1.4e-27	3.7975e-24
green	GO:0019439	aromatic compound catabolic process	725	86	23.37	3.67993	1.9e-27	4.4175e-24
green	GO:0044270	cellular nitrogen compound catabolic pro...	724	85	23.33	3.64338	8.8e-27	1.59133e-23
green	GO:0046700	heterocycle catabolic process	724	85	23.33	3.64338	8.8e-27	1.59133e-23
green	GO:1901361	organic cyclic compound catabolic proces...	745	86	24.01	3.58184	1.4e-26	2.2785e-23
green	GO:0070727	cellular macromolecule localization	922	93	29.72	3.12921	2e-24	2.95909e-21
green	GO:0009057	macromolecule catabolic process	841	88	27.1	3.24723	3.7e-24	5.01813e-21
green	GO:0034613	cellular protein localization	917	92	29.55	3.11337	5.6e-24	7.01077e-21
green	GO:0043933	macromolecular complex subunit organizat...	1214	107	39.13	2.73447	1.5e-23	1.74375e-20
green	GO:0071822	protein complex subunit organization	986	95	31.78	2.9893	1.7e-23	1.8445e-20
green	GO:0015031	protein transport	1124	99	36.23	2.73254	1.3e-21	1.24456e-18
green	GO:0046907	intracellular transport	1171	101	37.74	2.67621	2.2e-21	1.98917e-18
green	GO:0051704	multi-organism process	1010	92	32.55	2.82642	5.6e-21	4.79684e-18
green	GO:0045184	establishment of protein localization	1178	100	37.97	2.63366	1.2e-20	9.765e-18
green	GO:0008104	protein localization	1462	109	47.12	2.31324	2.9e-18	1.96656e-15
green	GO:0051649	establishment of localization in cell	1608	114	51.82	2.19992	1.7e-17	1.02472e-14
green	GO:0051641	cellular localization	1825	120	58.82	2.04012	6.2e-16	2.883e-13
green	GO:0044248	cellular catabolic process	1511	106	48.7	2.17659	8.2e-16	3.70708e-13
green	GO:0033036	macromolecule localization	1684	113	54.27	2.08218	1.6e-15	6.85263e-13
green	GO:0071702	organic substance transport	1629	109	52.5	2.07619	7.7e-15	3.13294e-12
green	GO:0044267	cellular protein metabolic process	2902	160	93.53	1.71068	9.8e-15	3.89012e-12
green	GO:0071840	cellular component organization or bioge...	3845	192	123.92	1.54939	5.5e-14	1.90452e-11
green	GO:0016043	cellular component organization	3745	188	120.7	1.55758	8.3e-14	2.81422e-11
green	GO:1901575	organic substance catabolic process	1602	105	51.63	2.0337	1.2e-13	3.906e-11
green	GO:0019538	protein metabolic process	3314	168	106.81	1.57289	3.4e-12	8.1375e-10
green	GO:0009056	catabolic process	1787	108	57.59	1.87533	9.6e-12	1.90537e-09
green	GO:0022613	ribonucleoprotein complex biogenesis	251	32	8.09	3.9555	2.3e-11	4.30259e-09
green	GO:0010467	gene expression	3722	179	119.96	1.49216	4.5e-11	7.79122e-09
green	GO:0042274	ribosomal small subunit biogenesis	20	10	0.64	15.625	1.5e-10	2.46591e-08
green	GO:0044765	single-organism transport	2243	122	72.29	1.68765	3e-10	4.78676e-08
green	GO:0006810	transport	2749	141	88.6	1.59142	3.7e-10	5.79014e-08
green	GO:0051234	establishment of localization	2801	142	90.27	1.57306	7.1e-10	1.06011e-07
green	GO:0042254	ribosome biogenesis	151	22	4.87	4.51745	2.8e-09	3.675e-07
green	GO:0032774	RNA biosynthetic process	2704	135	87.15	1.54905	7.4e-09	8.53584e-07
green	GO:0016070	RNA metabolic process	3311	157	106.71	1.47128	7.5e-09	8.53584e-07
green	GO:0090304	nucleic acid metabolic process	3758	170	121.12	1.40357	4e-08	3.74138e-06
green	GO:0022904	respiratory electron transport chain	95	16	3.06	5.22876	5.3e-08	4.76561e-06
green	GO:0018130	heterocycle biosynthetic process	2982	142	96.11	1.47747	5.7e-08	5.06926e-06
green	GO:0022900	electron transport chain	96	16	3.09	5.17799	6.1e-08	5.28072e-06
green	GO:0044237	cellular metabolic process	7133	276	229.89	1.20057	6.4e-08	5.51111e-06
green	GO:0042273	ribosomal large subunit biogenesis	14	7	0.45	15.5556	9.6e-08	7.93096e-06
green	GO:0034654	nucleobase-containing compound biosynthe...	2926	139	94.3	1.47402	1e-07	8.1375e-06
green	GO:0016072	rRNA metabolic process	113	17	3.64	4.67033	1.1e-07	8.73293e-06
green	GO:0019438	aromatic compound biosynthetic process	2974	140	95.85	1.46062	1.6e-07	1.1945e-05
green	GO:1901362	organic cyclic compound biosynthetic pro...	3058	143	98.56	1.45089	1.6e-07	1.1945e-05
green	GO:0046483	heterocycle metabolic process	4505	192	145.19	1.32241	2.6e-07	1.82392e-05
green	GO:0044260	cellular macromolecule metabolic process	5654	229	182.22	1.25672	2.8e-07	1.92278e-05
green	GO:0006139	nucleobase-containing compound metabolic...	4389	188	141.45	1.32909	2.9e-07	1.9584e-05
green	GO:0044271	cellular nitrogen compound biosynthetic ...	3029	141	97.62	1.44438	2.9e-07	1.9584e-05
green	GO:0006364	rRNA processing	107	16	3.45	4.63768	2.9e-07	1.9584e-05
green	GO:1901360	organic cyclic compound metabolic proces...	4644	196	149.67	1.30955	3.7e-07	2.38014e-05
green	GO:0034645	cellular macromolecule biosynthetic proc...	3494	157	112.61	1.39419	3.7e-07	2.38014e-05
green	GO:0006725	cellular aromatic compound metabolic pro...	4506	191	145.22	1.31525	4.7e-07	2.89744e-05
green	GO:0051179	localization	3438	154	110.8	1.38989	6.7e-07	4.02371e-05
green	GO:0009059	macromolecule biosynthetic process	3562	158	114.8	1.37631	8e-07	4.70036e-05
green	GO:0008152	metabolic process	7671	287	247.23	1.16086	1.1e-06	5.9675e-05
green	GO:0034641	cellular nitrogen compound metabolic pro...	4679	194	150.8	1.28647	2e-06	0.000103662
green	GO:0016568	chromatin modification	428	32	13.79	2.32052	8e-06	0.0003472
green	GO:0022618	ribonucleoprotein complex assembly	122	15	3.93	3.81679	8.4e-06	0.000360712
green	GO:0016570	histone modification	275	24	8.86	2.7088	9.1e-06	0.000385684
green	GO:0043170	macromolecule metabolic process	6064	235	195.44	1.20242	1e-05	0.000410985
green	GO:0044249	cellular biosynthetic process	4180	174	134.72	1.29157	1.1e-05	0.000445336
green	GO:0016569	covalent chromatin modification	279	24	8.99	2.66963	1.2e-05	0.000481034
green	GO:0009058	biosynthetic process	4307	178	138.81	1.28233	1.2e-05	0.000481034
green	GO:0030490	maturation of SSU-rRNA	11	5	0.35	14.2857	1.3e-05	0.000516037
green	GO:0045333	cellular respiration	143	16	4.61	3.47072	1.4e-05	0.000551695
green	GO:0071826	ribonucleoprotein complex subunit organi...	128	15	4.13	3.63196	1.5e-05	0.000582637
green	GO:1901576	organic substance biosynthetic process	4251	175	137.01	1.27728	2.1e-05	0.000783888
green	GO:0034470	ncRNA processing	204	19	6.57	2.89193	3.2e-05	0.00114211
green	GO:0006325	chromatin organization	484	33	15.6	2.11538	3.8e-05	0.00134154
green	GO:0006807	nitrogen compound metabolic process	4965	197	160.02	1.2311	4.3e-05	0.0015115
green	GO:0034660	ncRNA metabolic process	289	23	9.31	2.47046	6e-05	0.00204717
green	GO:0071704	organic substance metabolic process	7336	268	236.43	1.13353	0.00016	0.0048764
green	GO:0016573	histone acetylation	109	12	3.51	3.4188	0.0002	0.00587545
green	GO:0018393	internal peptidyl-lysine acetylation	112	12	3.61	3.3241	0.00025	0.00717593
green	GO:0042255	ribosome assembly	19	5	0.61	8.19672	0.00027	0.00772276
green	GO:0006396	RNA processing	633	37	20.4	1.81373	0.00031	0.00872881
green	GO:0018394	peptidyl-lysine acetylation	115	12	3.71	3.2345	0.00033	0.00924398
green	GO:0044238	primary metabolic process	7135	260	229.95	1.13068	0.00037	0.0101547
green	GO:0006475	internal protein amino acid acetylation	117	12	3.77	3.18302	0.00038	0.0103941
green	GO:0018205	peptidyl-lysine modification	153	14	4.93	2.83976	0.00042	0.0113171
green	GO:0006446	regulation of translational initiation	59	8	1.9	4.21053	0.00057	0.0145404
green	GO:0006417	regulation of translation	215	17	6.93	2.4531	0.00059	0.0149568
green	GO:0006473	protein acetylation	127	12	4.09	2.93399	0.0008	0.0192319
green	GO:0051276	chromosome organization	643	36	20.72	1.73745	0.00084	0.0200161
green	GO:0006338	chromatin remodeling	95	10	3.06	3.26797	0.00094	0.021855
green	GO:0040029	regulation of gene expression, epigeneti...	130	12	4.19	2.86396	0.00099	0.0227574
green	GO:0044085	cellular component biogenesis	1573	72	50.7	1.42012	0.00107	0.0239866
green	GO:0001731	formation of translation preinitiation c...	15	4	0.48	8.33333	0.00109	0.0242016
green	GO:0010608	posttranscriptional regulation of gene e...	357	23	11.51	1.99826	0.00125	0.0270889
green	GO:0015980	energy derivation by oxidation of organi...	274	19	8.83	2.15176	0.00141	0.0300363
green	GO:0006996	organelle organization	2102	90	67.75	1.32841	0.00191	0.0387114
green	GO:0034968	histone lysine methylation	56	7	1.8	3.88889	0.00203	0.0404881
green	GO:0016571	histone methylation	72	8	2.32	3.44828	0.00213	0.0416656
green	GO:0006479	protein methylation	91	9	2.93	3.07167	0.00259	0.0485066
green	GO:0008213	protein alkylation	91	9	2.93	3.07167	0.00259	0.0485066
green	GO:0043543	protein acylation	146	12	4.71	2.54777	0.00267	0.0498329
green	GO:0006119	oxidative phosphorylation	61	7	1.97	3.5533	0.00333	0.0593601
green	GO:0043967	histone H4 acetylation	46	6	1.48	4.05405	0.00339	0.060166
green	GO:0044728	DNA methylation or demethylation	46	6	1.48	4.05405	0.00339	0.060166
green	GO:0043618	regulation of transcription from RNA pol...	33	5	1.06	4.71698	0.00382	0.0658586
green	GO:0042773	ATP synthesis coupled electron transport	48	6	1.55	3.87097	0.00421	0.0701308
green	GO:0042775	mitochondrial ATP synthesis coupled elec...	48	6	1.55	3.87097	0.00421	0.0701308
green	GO:0006266	DNA ligation	11	3	0.35	8.57143	0.00452	0.0741708
green	GO:0031057	negative regulation of histone modificat...	22	4	0.71	5.6338	0.0049	0.0786464
green	GO:0006120	mitochondrial electron transport, NADH t...	37	5	1.19	4.20168	0.00631	0.0952646
green	GO:0034622	cellular macromolecular complex assembly	503	27	16.21	1.66564	0.00648	0.0964004
green	GO:0006091	generation of precursor metabolites and ...	338	20	10.89	1.83655	0.00658	0.0973541
green	GO:0006305	DNA alkylation	38	5	1.22	4.09836	0.00708	0.101971
green	GO:0006306	DNA methylation	38	5	1.22	4.09836	0.00708	0.101971
green	GO:0043620	regulation of DNA-dependent transcriptio...	38	5	1.22	4.09836	0.00708	0.101971
green	GO:0017038	protein import	209	14	6.74	2.07715	0.00776	0.10963
green	GO:0061418	regulation of transcription from RNA pol...	26	4	0.84	4.7619	0.00905	0.122774
green	GO:0019068	virion assembly	14	3	0.45	6.66667	0.00928	0.124923
green	GO:0035510	DNA dealkylation	14	3	0.45	6.66667	0.00928	0.124923
green	GO:0055114	oxidation-reduction process	426	23	13.73	1.67516	0.01082	0.139906
green	GO:0006304	DNA modification	59	6	1.9	3.15789	0.0115	0.144863
green	GO:0045778	positive regulation of ossification	28	4	0.9	4.44444	0.01178	0.147137
green	GO:0044763	single-organism cellular process	7522	262	242.43	1.08072	0.01325	0.158329
green	GO:0043414	macromolecule methylation	138	10	4.45	2.24719	0.01374	0.161808
green	GO:0016574	histone ubiquitination	30	4	0.97	4.12371	0.015	0.172527
green	GO:0043966	histone H3 acetylation	46	5	1.48	3.37838	0.01569	0.178684
green	GO:0009987	cellular process	10175	339	327.93	1.03376	0.01598	0.17971
green	GO:0015985	energy coupled proton transport, down el...	17	3	0.55	5.45455	0.01613	0.180299
green	GO:0015986	ATP synthesis coupled proton transport	17	3	0.55	5.45455	0.01613	0.180299
green	GO:0000910	cytokinesis	121	9	3.9	2.30769	0.0162	0.180821
green	GO:0007163	establishment or maintenance of cell pol...	103	8	3.32	2.40964	0.018	0.194781
green	GO:2001021	negative regulation of response to DNA d...	32	4	1.03	3.8835	0.01871	0.201076
green	GO:0010830	regulation of myotube differentiation	18	3	0.58	5.17241	0.01891	0.202075
green	GO:0051301	cell division	449	23	14.47	1.5895	0.0191	0.203039
green	GO:0034504	protein localization to nucleus	212	13	6.83	1.90337	0.01983	0.209295
green	GO:0051568	histone H3-K4 methylation	33	4	1.06	3.77358	0.02077	0.215719
green	GO:0007220	Notch receptor processing	19	3	0.61	4.91803	0.02193	0.223768
green	GO:0034243	regulation of transcription elongation f...	19	3	0.61	4.91803	0.02193	0.223768
green	GO:0032259	methylation	149	10	4.8	2.08333	0.02231	0.22651
green	GO:0043044	ATP-dependent chromatin remodeling	34	4	1.1	3.63636	0.02296	0.23152
green	GO:0016458	gene silencing	89	7	2.87	2.43902	0.02456	0.243877
green	GO:0048524	positive regulation of viral process	70	6	2.26	2.65487	0.02499	0.246194
green	GO:0007212	dopamine receptor signaling pathway	20	3	0.64	4.6875	0.02519	0.247714
green	GO:2001251	negative regulation of chromosome organi...	35	4	1.13	3.53982	0.02528	0.248449
green	GO:0006383	transcription from RNA polymerase III pr...	52	5	1.68	2.97619	0.02547	0.250015
green	GO:0010970	microtubule-based transport	71	6	2.29	2.62009	0.02658	0.258262
green	GO:0065003	macromolecular complex assembly	939	41	30.26	1.35492	0.02776	0.266231
green	GO:0043902	positive regulation of multi-organism pr...	72	6	2.32	2.58621	0.02824	0.269248
green	GO:0051293	establishment of spindle localization	21	3	0.68	4.41176	0.02871	0.272452
green	GO:0006606	protein import into nucleus	179	11	5.77	1.90641	0.03025	0.282943
green	GO:0044744	protein targeting to nucleus	179	11	5.77	1.90641	0.03025	0.282943
green	GO:0007077	mitotic nuclear envelope disassembly	37	4	1.19	3.36134	0.03034	0.282943
green	GO:0014902	myotube differentiation	37	4	1.19	3.36134	0.03034	0.282943
green	GO:0030501	positive regulation of bone mineralizati...	22	3	0.71	4.22535	0.03247	0.292446
green	GO:0033108	mitochondrial respiratory chain complex ...	22	3	0.71	4.22535	0.03247	0.292446
green	GO:0070169	positive regulation of biomineral tissue...	22	3	0.71	4.22535	0.03247	0.292446
green	GO:2001014	regulation of skeletal muscle cell diffe...	22	3	0.71	4.22535	0.03247	0.292446
green	GO:0031503	protein complex localization	38	4	1.22	3.27869	0.03308	0.296463
green	GO:0051170	nuclear import	182	11	5.87	1.87394	0.03357	0.299789
green	GO:0060271	cilium morphogenesis	116	8	3.74	2.13904	0.03373	0.300963
green	GO:0030705	cytoskeleton-dependent intracellular tra...	76	6	2.45	2.44898	0.03556	0.31385
green	GO:0030397	membrane disassembly	39	4	1.26	3.1746	0.03595	0.315251
green	GO:0048742	regulation of skeletal muscle fiber deve...	39	4	1.26	3.1746	0.03595	0.315251
green	GO:0051081	nuclear envelope disassembly	39	4	1.26	3.1746	0.03595	0.315251
green	GO:0007219	Notch signaling pathway	119	8	3.84	2.08333	0.03837	0.326264
green	GO:0097194	execution phase of apoptosis	98	7	3.16	2.21519	0.03872	0.328384
green	GO:0006744	ubiquinone biosynthetic process	10	2	0.32	6.25	0.03928	0.330378
green	GO:0045426	quinone cofactor biosynthetic process	10	2	0.32	6.25	0.03928	0.330378
red	GO:0018193	peptidyl-amino acid modification	582	33	16.35	2.01835	9.2e-05	0.00301875
red	GO:0032870	cellular response to hormone stimulus	302	21	8.48	2.47642	0.00012	0.00380702
red	GO:0071375	cellular response to peptide hormone sti...	224	17	6.29	2.7027	0.00019	0.00561207
red	GO:1901653	cellular response to peptide	224	17	6.29	2.7027	0.00019	0.00561207
red	GO:0070201	regulation of establishment of protein l...	277	19	7.78	2.44216	0.0003	0.00846187
red	GO:0032869	cellular response to insulin stimulus	172	14	4.83	2.89855	0.00035	0.0096875
red	GO:0071495	cellular response to endogenous stimulus	629	33	17.67	1.86757	0.00039	0.0106497
red	GO:0048194	Golgi vesicle budding	14	4	0.39	10.2564	0.00049	0.012925
red	GO:0008286	insulin receptor signaling pathway	139	12	3.9	3.07692	0.00054	0.0139944
red	GO:0006900	membrane budding	40	6	1.12	5.35714	0.0008	0.0192319
red	GO:0008104	protein localization	1462	61	41.06	1.48563	0.00084	0.0200161
red	GO:0033036	macromolecule localization	1684	68	47.3	1.43763	0.00098	0.0225914
red	GO:0032880	regulation of protein localization	330	20	9.27	2.1575	0.00103	0.02325
red	GO:0045184	establishment of protein localization	1178	51	33.09	1.54125	0.00108	0.0240781
red	GO:0043536	positive regulation of blood vessel endo...	17	4	0.48	8.33333	0.00109	0.0242016
red	GO:0032868	response to insulin stimulus	195	14	5.48	2.55474	0.00121	0.0265401
red	GO:0006470	protein dephosphorylation	133	11	3.74	2.94118	0.00129	0.0278076
red	GO:0051223	regulation of protein transport	228	15	6.4	2.34375	0.00195	0.0392775
red	GO:0016050	vesicle organization	100	9	2.81	3.20285	0.00196	0.0393815
red	GO:0015031	protein transport	1124	48	31.57	1.52043	0.00203	0.0404881
red	GO:0042992	negative regulation of transcription fac...	33	5	0.93	5.37634	0.00211	0.0413738
red	GO:0043434	response to peptide hormone stimulus	277	17	7.78	2.18509	0.00211	0.0413738
red	GO:0016192	vesicle-mediated transport	809	37	22.72	1.62852	0.00218	0.0423889
red	GO:0009755	hormone-mediated signaling pathway	21	4	0.59	6.77966	0.0025	0.0472561
red	GO:1901652	response to peptide	284	17	7.98	2.13033	0.00274	0.0509058
red	GO:0071417	cellular response to organonitrogen comp...	309	18	8.68	2.07373	0.00279	0.0516578
red	GO:1901699	cellular response to nitrogen compound	334	19	9.38	2.02559	0.00281	0.051969
red	GO:0046326	positive regulation of glucose import	22	4	0.62	6.45161	0.00299	0.0545541
red	GO:0043412	macromolecule modification	2303	85	64.69	1.31396	0.00318	0.0572506
red	GO:0034613	cellular protein localization	917	40	25.76	1.5528	0.00339	0.060166
red	GO:0070727	cellular macromolecule localization	922	40	25.9	1.5444	0.00372	0.0646827
red	GO:0032270	positive regulation of cellular protein ...	695	32	19.52	1.63934	0.00392	0.0667343
red	GO:0010828	positive regulation of glucose transport	25	4	0.7	5.71429	0.00484	0.0780684
red	GO:0034260	negative regulation of GTPase activity	13	3	0.37	8.10811	0.00509	0.0805051
red	GO:0035964	COPI-coated vesicle budding	13	3	0.37	8.10811	0.00509	0.0805051
red	GO:0048200	Golgi transport vesicle coating	13	3	0.37	8.10811	0.00509	0.0805051
red	GO:0048205	COPI coating of Golgi vesicle	13	3	0.37	8.10811	0.00509	0.0805051
red	GO:0010634	positive regulation of epithelial cell m...	57	6	1.6	3.75	0.0051	0.0805068
red	GO:0002764	immune response-regulating signaling pat...	329	18	9.24	1.94805	0.00538	0.084111
red	GO:0010595	positive regulation of endothelial cell ...	41	5	1.15	4.34783	0.00554	0.086025
red	GO:0042347	negative regulation of NF-kappaB import ...	14	3	0.39	7.69231	0.00635	0.0956645
red	GO:0006464	cellular protein modification process	2200	80	61.79	1.29471	0.00647	0.0964004
red	GO:0036211	protein modification process	2200	80	61.79	1.29471	0.00647	0.0964004
red	GO:0007167	enzyme linked receptor protein signaling...	752	33	21.12	1.5625	0.00701	0.101971
red	GO:0009719	response to endogenous stimulus	877	37	24.63	1.50223	0.00814	0.113715
red	GO:0045185	maintenance of protein location	103	8	2.89	2.76817	0.00837	0.115973
red	GO:0021591	ventricular system development	16	3	0.45	6.66667	0.00937	0.125926
red	GO:0035329	hippo signaling cascade	30	4	0.84	4.7619	0.0094	0.126017
red	GO:0042147	retrograde transport, endosome to Golgi	30	4	0.84	4.7619	0.0094	0.126017
red	GO:0043535	regulation of blood vessel endothelial c...	30	4	0.84	4.7619	0.0094	0.126017
red	GO:0007265	Ras protein signal transduction	349	18	9.8	1.83673	0.00967	0.128368
red	GO:0033157	regulation of intracellular protein tran...	150	10	4.21	2.3753	0.00971	0.128794
red	GO:0006886	intracellular protein transport	655	29	18.4	1.57609	0.01002	0.132152
red	GO:0071363	cellular response to growth factor stimu...	514	24	14.44	1.66205	0.01014	0.13335
red	GO:0019228	regulation of action potential in neuron	86	7	2.42	2.89256	0.01043	0.136235
red	GO:0009311	oligosaccharide metabolic process	31	4	0.87	4.5977	0.01056	0.137381
red	GO:0046889	positive regulation of lipid biosyntheti...	31	4	0.87	4.5977	0.01056	0.137381
red	GO:0042308	negative regulation of protein import in...	48	5	1.35	3.7037	0.01079	0.139815
red	GO:0007169	transmembrane receptor protein tyrosine ...	546	25	15.34	1.62973	0.01106	0.141845
red	GO:0035023	regulation of Rho protein signal transdu...	153	10	4.3	2.32558	0.01107	0.141862
red	GO:0051310	metaphase plate congression	17	3	0.48	6.25	0.01114	0.142295
red	GO:0043534	blood vessel endothelial cell migration	49	5	1.38	3.62319	0.01175	0.146875
red	GO:0030199	collagen fibril organization	32	4	0.9	4.44444	0.01181	0.147399
red	GO:0045862	positive regulation of proteolysis	68	6	1.91	3.14136	0.0119	0.148294
red	GO:0006606	protein import into nucleus	179	11	5.03	2.18688	0.01222	0.150667
red	GO:0044744	protein targeting to nucleus	179	11	5.03	2.18688	0.01222	0.150667
red	GO:0070848	response to growth factor stimulus	523	24	14.69	1.63376	0.01236	0.151589
red	GO:0051224	negative regulation of protein transport	89	7	2.5	2.8	0.01246	0.152258
red	GO:0045834	positive regulation of lipid metabolic p...	69	6	1.94	3.09278	0.01274	0.154388
red	GO:0051247	positive regulation of protein metabolic...	756	32	21.23	1.5073	0.01296	0.15624
red	GO:0007398	ectoderm development	18	3	0.51	5.88235	0.0131	0.157229
red	GO:0043170	macromolecule metabolic process	6064	190	170.32	1.11555	0.01319	0.157844
red	GO:0032507	maintenance of protein location in cell	90	7	2.53	2.7668	0.0132	0.157847
red	GO:0031401	positive regulation of protein modificat...	612	27	17.19	1.57068	0.01332	0.158583
red	GO:0051128	regulation of cellular component organiz...	1150	45	32.3	1.39319	0.01341	0.159421
red	GO:0051170	nuclear import	182	11	5.11	2.15264	0.01371	0.161572
red	GO:0009966	regulation of signal transduction	1559	58	43.79	1.3245	0.01391	0.163102
red	GO:0018105	peptidyl-serine phosphorylation	113	8	3.17	2.52366	0.01419	0.165431
red	GO:0010243	response to organonitrogen compound	478	22	13.43	1.63812	0.01576	0.179115
red	GO:0044260	cellular macromolecule metabolic process	5654	178	158.81	1.12084	0.01577	0.179115
red	GO:0016311	dephosphorylation	236	13	6.63	1.96078	0.0159	0.17933
red	GO:0042990	regulation of transcription factor impor...	53	5	1.49	3.3557	0.01616	0.180511
red	GO:0034504	protein localization to nucleus	212	12	5.95	2.01681	0.01658	0.183689
red	GO:0002768	immune response-regulating cell surface ...	238	13	6.68	1.94611	0.01694	0.187041
red	GO:0030216	keratinocyte differentiation	54	5	1.52	3.28947	0.01741	0.190807
red	GO:0042991	transcription factor import into nucleus	54	5	1.52	3.28947	0.01741	0.190807
red	GO:1901698	response to nitrogen compound	511	23	14.35	1.60279	0.01743	0.190897
red	GO:0042552	myelination	74	6	2.08	2.88462	0.01754	0.191291
red	GO:0050768	negative regulation of neurogenesis	74	6	2.08	2.88462	0.01754	0.191291
red	GO:0050852	T cell receptor signaling pathway	74	6	2.08	2.88462	0.01754	0.191291
red	GO:0060428	lung epithelium development	20	3	0.56	5.35714	0.01756	0.191291
red	GO:0090004	positive regulation of establishment of ...	20	3	0.56	5.35714	0.01756	0.191291
red	GO:0006901	vesicle coating	36	4	1.01	3.9604	0.01773	0.192756
red	GO:0006903	vesicle targeting	36	4	1.01	3.9604	0.01773	0.192756
red	GO:0046324	regulation of glucose import	36	4	1.01	3.9604	0.01773	0.192756
red	GO:0006796	phosphate-containing compound metabolic ...	2031	72	57.05	1.26205	0.01786	0.193781
red	GO:0046823	negative regulation of nucleocytoplasmic...	55	5	1.54	3.24675	0.01873	0.201076
red	GO:0007219	Notch signaling pathway	119	8	3.34	2.39521	0.01885	0.201887
red	GO:0050000	chromosome localization	21	3	0.59	5.08475	0.02006	0.210902
red	GO:0051303	establishment of chromosome localization	21	3	0.59	5.08475	0.02006	0.210902
red	GO:0060334	regulation of interferon-gamma-mediated ...	21	3	0.59	5.08475	0.02006	0.210902
red	GO:0018108	peptidyl-tyrosine phosphorylation	144	9	4.04	2.22772	0.02024	0.212109
red	GO:0048011	neurotrophin TRK receptor signaling path...	244	13	6.85	1.89781	0.02036	0.212138
red	GO:0007009	plasma membrane organization	121	8	3.4	2.35294	0.02062	0.214572
red	GO:0007272	ensheathment of neurons	77	6	2.16	2.77778	0.02095	0.217138
red	GO:0008366	axon ensheathment	77	6	2.16	2.77778	0.02095	0.217138
red	GO:0032318	regulation of Ras GTPase activity	145	9	4.07	2.2113	0.02107	0.217723
red	GO:0051651	maintenance of location in cell	99	7	2.78	2.51799	0.02129	0.219439
red	GO:0018209	peptidyl-serine modification	122	8	3.43	2.33236	0.02155	0.221278
red	GO:0051235	maintenance of location	170	10	4.77	2.09644	0.02168	0.222333
red	GO:0018212	peptidyl-tyrosine modification	146	9	4.1	2.19512	0.02192	0.223768
red	GO:0002757	immune response-activating signal transd...	247	13	6.94	1.8732	0.02225	0.226183
red	GO:0038179	neurotrophin signaling pathway	247	13	6.94	1.8732	0.02225	0.226183
red	GO:0002042	cell migration involved in sprouting ang...	22	3	0.62	4.83871	0.02276	0.229646
red	GO:0006298	mismatch repair	22	3	0.62	4.83871	0.02276	0.229646
red	GO:0046825	regulation of protein export from nucleu...	22	3	0.62	4.83871	0.02276	0.229646
red	GO:0051220	cytoplasmic sequestering of protein	22	3	0.62	4.83871	0.02276	0.229646
red	GO:0060330	regulation of response to interferon-gam...	22	3	0.62	4.83871	0.02276	0.229646
red	GO:0010171	body morphogenesis	39	4	1.1	3.63636	0.0232	0.2325
red	GO:0046323	glucose import	39	4	1.1	3.63636	0.0232	0.2325
red	GO:0006650	glycerophospholipid metabolic process	197	11	5.53	1.98915	0.02327	0.232915
red	GO:0045017	glycerolipid biosynthetic process	197	11	5.53	1.98915	0.02327	0.232915
red	GO:0007049	cell cycle	1321	49	37.1	1.32075	0.02472	0.244868
red	GO:0071560	cellular response to transforming growth...	174	10	4.89	2.04499	0.02499	0.246194
red	GO:0046486	glycerolipid metabolic process	252	13	7.08	1.83616	0.0257	0.25212
red	GO:0071559	response to transforming growth factor b...	175	10	4.92	2.03252	0.02587	0.253635
red	GO:0071310	cellular response to organic substance	1199	45	33.68	1.3361	0.02597	0.254297
red	GO:0006793	phosphorus metabolic process	2068	72	58.09	1.23946	0.02612	0.255164
red	GO:0060284	regulation of cell development	417	19	11.71	1.62254	0.02615	0.255304
red	GO:0042787	protein ubiquitination involved in ubiqu...	60	5	1.69	2.95858	0.02627	0.256168
red	GO:0009203	ribonucleoside triphosphate catabolic pr...	362	17	10.17	1.67158	0.02672	0.259004
red	GO:0009207	purine ribonucleoside triphosphate catab...	362	17	10.17	1.67158	0.02672	0.259004
red	GO:0023051	regulation of signaling	1745	62	49.01	1.26505	0.02698	0.261096
red	GO:0045596	negative regulation of cell differentiat...	335	16	9.41	1.70032	0.02712	0.261635
red	GO:0050776	regulation of immune response	476	21	13.37	1.57068	0.0273	0.26306
red	GO:0006913	nucleocytoplasmic transport	308	15	8.65	1.7341	0.02736	0.263482
red	GO:0010646	regulation of cell communication	1748	62	49.1	1.26273	0.02784	0.266684
red	GO:0009146	purine nucleoside triphosphate catabolic...	364	17	10.22	1.66341	0.02798	0.26743
red	GO:0051336	regulation of hydrolase activity	624	26	17.53	1.48317	0.02842	0.270647
red	GO:1901701	cellular response to oxygen-containing c...	507	22	14.24	1.54494	0.02849	0.270996
red	GO:0042345	regulation of NF-kappaB import into nucl...	24	3	0.67	4.47761	0.02871	0.272452
red	GO:0042348	NF-kappaB import into nucleus	24	3	0.67	4.47761	0.02871	0.272452
red	GO:0046578	regulation of Ras protein signal transdu...	256	13	7.19	1.80807	0.02873	0.272483
red	GO:0009143	nucleoside triphosphate catabolic proces...	366	17	10.28	1.6537	0.02927	0.276637
red	GO:0045444	fat cell differentiation	106	7	2.98	2.34899	0.02959	0.278691
red	GO:0007179	transforming growth factor beta receptor...	154	9	4.33	2.07852	0.02964	0.278839
red	GO:0001934	positive regulation of protein phosphory...	452	20	12.7	1.5748	0.02998	0.281712
red	GO:0010562	positive regulation of phosphorus metabo...	510	22	14.32	1.53631	0.03016	0.282943
red	GO:0045937	positive regulation of phosphate metabol...	510	22	14.32	1.53631	0.03016	0.282943
red	GO:0051169	nuclear transport	312	15	8.76	1.71233	0.03021	0.282943
red	GO:0000301	retrograde transport, vesicle recycling ...	10	2	0.28	7.14286	0.03049	0.282943
red	GO:0002467	germinal center formation	10	2	0.28	7.14286	0.03049	0.282943
red	GO:0006702	androgen biosynthetic process	10	2	0.28	7.14286	0.03049	0.282943
red	GO:0007183	SMAD protein complex assembly	10	2	0.28	7.14286	0.03049	0.282943
red	GO:0010837	regulation of keratinocyte proliferation	10	2	0.28	7.14286	0.03049	0.282943
red	GO:0019043	establishment of viral latency	10	2	0.28	7.14286	0.03049	0.282943
red	GO:0042640	anagen	10	2	0.28	7.14286	0.03049	0.282943
red	GO:0072600	establishment of protein localization to...	10	2	0.28	7.14286	0.03049	0.282943
red	GO:0090312	positive regulation of protein deacetyla...	10	2	0.28	7.14286	0.03049	0.282943
red	GO:2000036	regulation of stem cell maintenance	10	2	0.28	7.14286	0.03049	0.282943
red	GO:0006661	phosphatidylinositol biosynthetic proces...	84	6	2.36	2.54237	0.03058	0.282943
red	GO:0010632	regulation of epithelial cell migration	84	6	2.36	2.54237	0.03058	0.282943
red	GO:0032319	regulation of Rho GTPase activity	84	6	2.36	2.54237	0.03058	0.282943
red	GO:0048864	stem cell development	180	10	5.06	1.97628	0.03062	0.282943
red	GO:0043085	positive regulation of catalytic activit...	750	30	21.07	1.42383	0.03147	0.289037
red	GO:0010594	regulation of endothelial cell migration	63	5	1.77	2.82486	0.03162	0.289761
red	GO:0090317	negative regulation of intracellular pro...	63	5	1.77	2.82486	0.03162	0.289761
red	GO:0007166	cell surface receptor signaling pathway	1793	63	50.36	1.25099	0.03169	0.290021
red	GO:0006890	retrograde vesicle-mediated transport, G...	25	3	0.7	4.28571	0.03197	0.290321
red	GO:0007032	endosome organization	25	3	0.7	4.28571	0.03197	0.290321
red	GO:0006351	transcription, DNA-dependent	2621	88	73.62	1.19533	0.03202	0.290321
red	GO:0046488	phosphatidylinositol metabolic process	108	7	3.03	2.31023	0.03231	0.292299
red	GO:0007266	Rho protein signal transduction	182	10	5.11	1.95695	0.03268	0.293542
red	GO:0030335	positive regulation of cell migration	183	10	5.14	1.94553	0.03375	0.300976
red	GO:0017038	protein import	209	11	5.87	1.87394	0.03387	0.301881
red	GO:0006152	purine nucleoside catabolic process	373	17	10.48	1.62214	0.03418	0.304067
red	GO:0046130	purine ribonucleoside catabolic process	373	17	10.48	1.62214	0.03418	0.304067
red	GO:0009205	purine ribonucleoside triphosphate metab...	402	18	11.29	1.59433	0.03467	0.307496
red	GO:0048199	vesicle targeting, to, from or within Go...	26	3	0.73	4.10959	0.03541	0.313035
red	GO:0006996	organelle organization	2102	72	59.04	1.21951	0.03619	0.31641
red	GO:0019042	viral latency	11	2	0.31	6.45161	0.03659	0.317601
red	GO:0031954	positive regulation of protein autophosp...	11	2	0.31	6.45161	0.03659	0.317601
red	GO:0032878	regulation of establishment or maintenan...	11	2	0.31	6.45161	0.03659	0.317601
red	GO:0042987	amyloid precursor protein catabolic proc...	11	2	0.31	6.45161	0.03659	0.317601
red	GO:0090208	positive regulation of triglyceride meta...	11	2	0.31	6.45161	0.03659	0.317601
red	GO:1900117	regulation of execution phase of apoptos...	11	2	0.31	6.45161	0.03659	0.317601
red	GO:0002040	sprouting angiogenesis	45	4	1.26	3.1746	0.03691	0.319187
red	GO:2000147	positive regulation of cell motility	186	10	5.22	1.91571	0.03709	0.320233
red	GO:0042327	positive regulation of phosphorylation	463	20	13	1.53846	0.03717	0.320754
red	GO:0051100	negative regulation of binding	66	5	1.85	2.7027	0.0376	0.323265
red	GO:0042454	ribonucleoside catabolic process	378	17	10.62	1.60075	0.03803	0.324221
red	GO:0002253	activation of immune response	267	13	7.5	1.73333	0.03839	0.326264
red	GO:0009144	purine nucleoside triphosphate metabolic...	407	18	11.43	1.5748	0.03841	0.326264
red	GO:0048286	lung alveolus development	27	3	0.76	3.94737	0.03903	0.329638
red	GO:0009199	ribonucleoside triphosphate metabolic pr...	408	18	11.46	1.57068	0.03919	0.330378
red	GO:0030162	regulation of proteolysis	137	8	3.85	2.07792	0.03924	0.330378
red	GO:0048583	regulation of response to stimulus	1979	68	55.59	1.22324	0.03936	0.33088
red	GO:0060322	head development	46	4	1.29	3.10078	0.03956	0.332047
red	GO:0042303	molting cycle	67	5	1.88	2.65957	0.03973	0.332787
red	GO:0042633	hair cycle	67	5	1.88	2.65957	0.03973	0.332787
magenta	GO:0045935	positive regulation of nucleobase-contai...	944	14	4.67	2.99786	0.00015	0.00461484
magenta	GO:0051173	positive regulation of nitrogen compound...	963	14	4.77	2.93501	0.00018	0.00536538
magenta	GO:0051254	positive regulation of RNA metabolic pro...	856	13	4.24	3.06604	0.00021	0.006125
magenta	GO:0016568	chromatin modification	428	9	2.12	4.24528	0.00023	0.00667246
magenta	GO:0045893	positive regulation of transcription, DN...	801	12	3.97	3.02267	0.00044	0.011778
magenta	GO:0006325	chromatin organization	484	9	2.4	3.75	0.00056	0.0143754
magenta	GO:0006913	nucleocytoplasmic transport	308	7	1.53	4.57516	0.00076	0.0183789
magenta	GO:0051169	nuclear transport	312	7	1.54	4.54545	0.00082	0.0196257
magenta	GO:0010628	positive regulation of gene expression	861	12	4.26	2.8169	0.00085	0.0201658
magenta	GO:0031328	positive regulation of cellular biosynth...	990	13	4.9	2.65306	0.00087	0.0204613
magenta	GO:0009891	positive regulation of biosynthetic proc...	1005	13	4.98	2.61044	0.001	0.0228581
magenta	GO:0051276	chromosome organization	643	10	3.18	3.14465	0.00108	0.0240781
magenta	GO:0006996	organelle organization	2102	20	10.41	1.92123	0.00176	0.0360756
magenta	GO:0010557	positive regulation of macromolecule bio...	942	12	4.66	2.57511	0.00185	0.0378251
magenta	GO:0051028	mRNA transport	112	4	0.55	7.27273	0.00225	0.0434902
magenta	GO:0016570	histone modification	275	6	1.36	4.41176	0.00228	0.0437583
magenta	GO:0018105	peptidyl-serine phosphorylation	113	4	0.56	7.14286	0.00232	0.044369
magenta	GO:0006337	nucleosome disassembly	15	2	0.07	28.5714	0.00243	0.0462012
magenta	GO:0031498	chromatin disassembly	15	2	0.07	28.5714	0.00243	0.0462012
magenta	GO:0032986	protein-DNA complex disassembly	15	2	0.07	28.5714	0.00243	0.0462012
magenta	GO:0016569	covalent chromatin modification	279	6	1.38	4.34783	0.00246	0.0465541
magenta	GO:0031325	positive regulation of cellular metaboli...	1564	16	7.74	2.06718	0.00291	0.0535749
magenta	GO:0018209	peptidyl-serine modification	122	4	0.6	6.66667	0.00307	0.0557637
magenta	GO:0050657	nucleic acid transport	128	4	0.63	6.34921	0.00364	0.0636316
magenta	GO:0050658	RNA transport	128	4	0.63	6.34921	0.00364	0.0636316
magenta	GO:0051236	establishment of RNA localization	128	4	0.63	6.34921	0.00364	0.0636316
magenta	GO:0010507	negative regulation of autophagy	19	2	0.09	22.2222	0.0039	0.066533
magenta	GO:0000086	G2/M transition of mitotic cell cycle	133	4	0.66	6.06061	0.00418	0.0699892
magenta	GO:0006403	RNA localization	136	4	0.67	5.97015	0.00452	0.0741708
magenta	GO:0009893	positive regulation of metabolic process	1642	16	8.13	1.96802	0.00477	0.0772455
magenta	GO:0006366	transcription from RNA polymerase II pro...	1202	13	5.95	2.18487	0.00495	0.0792146
magenta	GO:0015931	nucleobase-containing compound transport	146	4	0.72	5.55556	0.00581	0.0893741
magenta	GO:0010604	positive regulation of macromolecule met...	1540	15	7.63	1.96592	0.0065	0.0966096
magenta	GO:0071840	cellular component organization or bioge...	3845	28	19.04	1.47059	0.00924	0.124694
magenta	GO:0022402	cell cycle process	1011	11	5.01	2.19561	0.00964	0.128074
magenta	GO:0006357	regulation of transcription from RNA pol...	1022	11	5.06	2.17391	0.01041	0.136083
magenta	GO:0035690	cellular response to drug	33	2	0.16	12.5	0.01152	0.144904
magenta	GO:0006338	chromatin remodeling	95	3	0.47	6.38298	0.01153	0.144904
magenta	GO:0006606	protein import into nucleus	179	4	0.89	4.49438	0.01174	0.146863
magenta	GO:0044744	protein targeting to nucleus	179	4	0.89	4.49438	0.01174	0.146863
magenta	GO:0051145	smooth muscle cell differentiation	34	2	0.17	11.7647	0.0122	0.150649
magenta	GO:0051170	nuclear import	182	4	0.9	4.44444	0.01242	0.152096
magenta	GO:0000278	mitotic cell cycle	771	9	3.82	2.35602	0.01269	0.153897
magenta	GO:0016043	cellular component organization	3745	27	18.54	1.45631	0.01292	0.155873
magenta	GO:0033043	regulation of organelle organization	516	7	2.55	2.7451	0.01317	0.15772
magenta	GO:0007077	mitotic nuclear envelope disassembly	37	2	0.18	11.1111	0.01435	0.1667
magenta	GO:0006886	intracellular protein transport	655	8	3.24	2.46914	0.01462	0.169112
magenta	GO:0048522	positive regulation of cellular process	2528	20	12.52	1.59744	0.01534	0.175199
magenta	GO:0030397	membrane disassembly	39	2	0.19	10.5263	0.01587	0.179115
magenta	GO:0051081	nuclear envelope disassembly	39	2	0.19	10.5263	0.01587	0.179115
magenta	GO:0045944	positive regulation of transcription fro...	538	7	2.66	2.63158	0.01625	0.181019
magenta	GO:0016573	histone acetylation	109	3	0.54	5.55556	0.01667	0.184561
magenta	GO:0018393	internal peptidyl-lysine acetylation	112	3	0.55	5.45455	0.01791	0.194194
magenta	GO:0014066	regulation of phosphatidylinositol 3-kin...	43	2	0.21	9.52381	0.01909	0.203039
magenta	GO:0018394	peptidyl-lysine acetylation	115	3	0.57	5.26316	0.0192	0.203969
magenta	GO:0017038	protein import	209	4	1.03	3.8835	0.01967	0.208011
magenta	GO:0071705	nitrogen compound transport	434	6	2.15	2.7907	0.01978	0.208903
magenta	GO:0006611	protein export from nucleus	44	2	0.22	9.09091	0.01994	0.210184
magenta	GO:0006475	internal protein amino acid acetylation	117	3	0.58	5.17241	0.02009	0.211081
magenta	GO:0019048	modulation by virus of host morphology o...	318	5	1.57	3.18471	0.02016	0.21168
magenta	GO:0034504	protein localization to nucleus	212	4	1.05	3.80952	0.02061	0.214572
magenta	GO:0044003	modification by symbiont of host morphol...	320	5	1.58	3.16456	0.02065	0.214747
magenta	GO:0006302	double-strand break repair	119	3	0.59	5.08475	0.021	0.217138
magenta	GO:0071824	protein-DNA complex subunit organization	119	3	0.59	5.08475	0.021	0.217138
magenta	GO:0051168	nuclear export	120	3	0.59	5.08475	0.02147	0.220699
magenta	GO:0043967	histone H4 acetylation	46	2	0.23	8.69565	0.02168	0.222333
magenta	GO:0006351	transcription, DNA-dependent	2621	20	12.98	1.54083	0.02247	0.227566
magenta	GO:0048518	positive regulation of biological proces...	2813	21	13.93	1.50754	0.02384	0.238327
magenta	GO:0006914	autophagy	125	3	0.62	4.83871	0.02387	0.23848
magenta	GO:0051252	regulation of RNA metabolic process	2462	19	12.19	1.55865	0.02391	0.238733
magenta	GO:0051817	modification of morphology or physiology...	333	5	1.65	3.0303	0.02404	0.239884
magenta	GO:0035821	modification of morphology or physiology...	334	5	1.65	3.0303	0.02432	0.242084
magenta	GO:0006473	protein acetylation	127	3	0.63	4.7619	0.02487	0.246153
magenta	GO:0044699	single-organism process	8160	47	40.4	1.16337	0.0259	0.253776
magenta	GO:0090304	nucleic acid metabolic process	3758	26	18.61	1.3971	0.02643	0.257112
magenta	GO:0046907	intracellular transport	1171	11	5.8	1.89655	0.02649	0.257542
magenta	GO:0006383	transcription from RNA polymerase III pr...	52	2	0.26	7.69231	0.02725	0.262733
magenta	GO:0019219	regulation of nucleobase-containing comp...	2850	21	14.11	1.48831	0.02738	0.263518
magenta	GO:0022411	cellular component disassembly	347	5	1.72	2.90698	0.02809	0.268132
magenta	GO:0051701	interaction with host	349	5	1.73	2.89017	0.0287	0.272452
magenta	GO:0016032	viral process	606	7	3	2.33333	0.02902	0.274753
magenta	GO:0006998	nuclear envelope organization	54	2	0.27	7.40741	0.02923	0.27642
magenta	GO:0031047	gene silencing by RNA	54	2	0.27	7.40741	0.02923	0.27642
magenta	GO:0044764	multi-organism cellular process	608	7	3.01	2.32558	0.02948	0.277815
magenta	GO:0032774	RNA biosynthetic process	2704	20	13.39	1.49365	0.03086	0.284398
magenta	GO:0031330	negative regulation of cellular cataboli...	56	2	0.28	7.14286	0.03126	0.287433
magenta	GO:0014065	phosphatidylinositol 3-kinase cascade	57	2	0.28	7.14286	0.0323	0.292299
magenta	GO:0065007	biological regulation	6867	41	34	1.20588	0.03276	0.293919
magenta	GO:0044767	single-organism developmental process	2723	20	13.48	1.48368	0.03308	0.296463
magenta	GO:0043933	macromolecular complex subunit organizat...	1214	11	6.01	1.83028	0.03346	0.299374
magenta	GO:0006355	regulation of transcription, DNA-depende...	2383	18	11.8	1.52542	0.03469	0.307505
magenta	GO:0034613	cellular protein localization	917	9	4.54	1.98238	0.03484	0.308499
magenta	GO:0042787	protein ubiquitination involved in ubiqu...	60	2	0.3	6.66667	0.03548	0.313484
magenta	GO:0043543	protein acylation	146	3	0.72	4.16667	0.03551	0.313579
magenta	GO:0051171	regulation of nitrogen compound metaboli...	2925	21	14.48	1.45028	0.03584	0.315251
magenta	GO:0070727	cellular macromolecule localization	922	9	4.57	1.96937	0.0359	0.315251
magenta	GO:0034654	nucleobase-containing compound biosynthe...	2926	21	14.49	1.44928	0.03597	0.315251
magenta	GO:0044403	symbiosis, encompassing mutualism throug...	635	7	3.14	2.2293	0.03612	0.31605
magenta	GO:0044419	interspecies interaction between organis...	635	7	3.14	2.2293	0.03612	0.31605
magenta	GO:0050905	neuromuscular process	61	2	0.3	6.66667	0.03657	0.317601
magenta	GO:0015849	organic acid transport	148	3	0.73	4.10959	0.03675	0.318311
magenta	GO:0046942	carboxylic acid transport	148	3	0.73	4.10959	0.03675	0.318311
magenta	GO:2001141	regulation of RNA biosynthetic process	2399	18	11.88	1.51515	0.03685	0.318838
magenta	GO:0010506	regulation of autophagy	62	2	0.31	6.45161	0.03767	0.323695
magenta	GO:0048015	phosphatidylinositol-mediated signaling	150	3	0.74	4.05405	0.03801	0.324221
magenta	GO:0048017	inositol lipid-mediated signaling	150	3	0.74	4.05405	0.03801	0.324221
magenta	GO:0016070	RNA metabolic process	3311	23	16.39	1.40329	0.03841	0.326264
magenta	GO:0031326	regulation of cellular biosynthetic proc...	2765	20	13.69	1.46092	0.03844	0.326349
magenta	GO:0018205	peptidyl-lysine modification	153	3	0.76	3.94737	0.03994	0.334031
magenta	GO:0007399	nervous system development	1410	12	6.98	1.7192	0.04034	0.336328
magenta	GO:0009889	regulation of biosynthetic process	2784	20	13.78	1.45138	0.04108	0.341285
magenta	GO:0001892	embryonic placenta development	66	2	0.33	6.06061	0.0422	0.348455
magenta	GO:0019438	aromatic compound biosynthetic process	2974	21	14.73	1.42566	0.04238	0.349764
magenta	GO:0048731	system development	2617	19	12.96	1.46605	0.04283	0.352228
magenta	GO:2000112	regulation of cellular macromolecule bio...	2620	19	12.97	1.46492	0.04328	0.355657
magenta	GO:0032481	positive regulation of type I interferon...	67	2	0.33	6.06061	0.04336	0.355657
magenta	GO:0018130	heterocycle biosynthetic process	2982	21	14.77	1.4218	0.04353	0.356348
magenta	GO:0051234	establishment of localization	2801	20	13.87	1.44196	0.04355	0.356348
magenta	GO:0010468	regulation of gene expression	2809	20	13.91	1.43781	0.04475	0.363971
magenta	GO:0010827	regulation of glucose transport	70	2	0.35	5.71429	0.04693	0.378488
magenta	GO:0006999	nuclear pore organization	10	1	0.05	20	0.04844	0.386641
magenta	GO:0010737	protein kinase A signaling cascade	10	1	0.05	20	0.04844	0.386641
magenta	GO:0014067	negative regulation of phosphatidylinosi...	10	1	0.05	20	0.04844	0.386641
magenta	GO:0071285	cellular response to lithium ion	10	1	0.05	20	0.04844	0.386641
magenta	GO:0080182	histone H3-K4 trimethylation	10	1	0.05	20	0.04844	0.386641
magenta	GO:0090312	positive regulation of protein deacetyla...	10	1	0.05	20	0.04844	0.386641
magenta	GO:1900151	regulation of nuclear-transcribed mRNA c...	10	1	0.05	20	0.04844	0.386641
magenta	GO:0007275	multicellular organismal development	3024	21	14.97	1.40281	0.04995	0.397913
magenta	GO:0007417	central nervous system development	541	6	2.68	2.23881	0.05004	0.39824
magenta	GO:0031056	regulation of histone modification	73	2	0.36	5.55556	0.05059	0.39988
magenta	GO:0044271	cellular nitrogen compound biosynthetic ...	3029	21	15	1.4	0.05076	0.400834
magenta	GO:0010556	regulation of macromolecule biosynthetic...	2669	19	13.22	1.43722	0.05122	0.404074
magenta	GO:0016482	cytoplasmic transport	686	7	3.4	2.05882	0.05128	0.404352
magenta	GO:0032446	protein modification by small protein co...	545	6	2.7	2.22222	0.05153	0.405145
magenta	GO:0071822	protein complex subunit organization	986	9	4.88	1.84426	0.05153	0.405145
magenta	GO:0000080	G1 phase of mitotic cell cycle	11	1	0.05	20	0.05316	0.415951
magenta	GO:0021694	cerebellar Purkinje cell layer formation	11	1	0.05	20	0.05316	0.415951
magenta	GO:0021702	cerebellar Purkinje cell differentiation	11	1	0.05	20	0.05316	0.415951
magenta	GO:0032922	circadian regulation of gene expression	11	1	0.05	20	0.05316	0.415951
magenta	GO:0051318	G1 phase	11	1	0.05	20	0.05316	0.415951
magenta	GO:0031329	regulation of cellular catabolic process	417	5	2.06	2.42718	0.05467	0.425547
magenta	GO:0048856	anatomical structure development	3053	21	15.12	1.38889	0.05478	0.425547
magenta	GO:0032502	developmental process	3426	23	16.96	1.35613	0.05519	0.426504
magenta	GO:0006367	transcription initiation from RNA polyme...	175	3	0.87	3.44828	0.05558	0.42911
magenta	GO:0014020	primary neural tube formation	77	2	0.38	5.26316	0.05563	0.429243
magenta	GO:1901362	organic cyclic compound biosynthetic pro...	3058	21	15.14	1.38705	0.05565	0.429243
magenta	GO:0007049	cell cycle	1321	11	6.54	1.68196	0.05638	0.433846
magenta	GO:0006892	post-Golgi vesicle-mediated transport	78	2	0.39	5.12821	0.05692	0.437175
magenta	GO:0015804	neutral amino acid transport	12	1	0.06	16.6667	0.05785	0.441652
magenta	GO:0021692	cerebellar Purkinje cell layer morphogen...	12	1	0.06	16.6667	0.05785	0.441652
magenta	GO:0033151	V(D)J recombination	12	1	0.06	16.6667	0.05785	0.441652
magenta	GO:0045815	positive regulation of gene expression, ...	12	1	0.06	16.6667	0.05785	0.441652
magenta	GO:0046854	phosphatidylinositol phosphorylation	12	1	0.06	16.6667	0.05785	0.441652
magenta	GO:0061014	positive regulation of mRNA catabolic pr...	12	1	0.06	16.6667	0.05785	0.441652
magenta	GO:0032984	macromolecular complex disassembly	178	3	0.88	3.40909	0.05791	0.441652
magenta	GO:0006997	nucleus organization	79	2	0.39	5.12821	0.05822	0.442564
magenta	GO:0019886	antigen processing and presentation of e...	79	2	0.39	5.12821	0.05822	0.442564
magenta	GO:1902275	regulation of chromatin organization	79	2	0.39	5.12821	0.05822	0.442564
magenta	GO:0009895	negative regulation of catabolic process	81	2	0.4	5	0.06084	0.459476
magenta	GO:0044763	single-organism cellular process	7522	43	37.24	1.15467	0.06088	0.459565
magenta	GO:0002495	antigen processing and presentation of p...	82	2	0.41	4.87805	0.06217	0.46606
magenta	GO:0002320	lymphoid progenitor cell differentiation	13	1	0.06	16.6667	0.06252	0.466963
magenta	GO:0031442	positive regulation of mRNA 3'-end proce...	13	1	0.06	16.6667	0.06252	0.466963
magenta	GO:0033158	regulation of protein import into nucleu...	13	1	0.06	16.6667	0.06252	0.466963
magenta	GO:0046834	lipid phosphorylation	13	1	0.06	16.6667	0.06252	0.466963
magenta	GO:0060216	definitive hemopoiesis	13	1	0.06	16.6667	0.06252	0.466963
magenta	GO:0061013	regulation of mRNA catabolic process	13	1	0.06	16.6667	0.06252	0.466963
magenta	GO:0030522	intracellular receptor signaling pathway	184	3	0.91	3.2967	0.06271	0.467953
magenta	GO:0002504	antigen processing and presentation of p...	83	2	0.41	4.87805	0.06351	0.473272
magenta	GO:0007051	spindle organization	84	2	0.42	4.7619	0.06485	0.481713
magenta	GO:0009790	embryo development	726	7	3.59	1.94986	0.06566	0.487508
magenta	GO:0006605	protein targeting	440	5	2.18	2.29358	0.0658	0.488324
magenta	GO:0006810	transport	2749	19	13.61	1.39603	0.06641	0.492178
magenta	GO:0018193	peptidyl-amino acid modification	582	6	2.88	2.08333	0.06668	0.493954
magenta	GO:0001504	neurotransmitter uptake	14	1	0.07	14.2857	0.06717	0.496004
magenta	GO:0007608	sensory perception of smell	14	1	0.07	14.2857	0.06717	0.496004
magenta	GO:0043984	histone H4-K16 acetylation	14	1	0.07	14.2857	0.06717	0.496004
magenta	GO:0051150	regulation of smooth muscle cell differe...	14	1	0.07	14.2857	0.06717	0.496004
magenta	GO:0060260	regulation of transcription initiation f...	14	1	0.07	14.2857	0.06717	0.496004
magenta	GO:2000191	regulation of fatty acid transport	14	1	0.07	14.2857	0.06717	0.496004
magenta	GO:0043009	chordate embryonic development	443	5	2.19	2.28311	0.06734	0.497033
magenta	GO:0009792	embryo development ending in birth or eg...	448	5	2.22	2.25225	0.06995	0.513503
magenta	GO:0001841	neural tube formation	88	2	0.44	4.54545	0.07034	0.515668
magenta	GO:0007605	sensory perception of sound	88	2	0.44	4.54545	0.07034	0.515668
magenta	GO:0008645	hexose transport	89	2	0.44	4.54545	0.07174	0.521134
magenta	GO:0015758	glucose transport	89	2	0.44	4.54545	0.07174	0.521134
magenta	GO:0016458	gene silencing	89	2	0.44	4.54545	0.07174	0.521134
magenta	GO:0007020	microtubule nucleation	15	1	0.07	14.2857	0.07179	0.521134
magenta	GO:0008045	motor neuron axon guidance	15	1	0.07	14.2857	0.07179	0.521134
magenta	GO:0016572	histone phosphorylation	15	1	0.07	14.2857	0.07179	0.521134
magenta	GO:0033522	histone H2A ubiquitination	15	1	0.07	14.2857	0.07179	0.521134
magenta	GO:0033962	cytoplasmic mRNA processing body assembl...	15	1	0.07	14.2857	0.07179	0.521134
magenta	GO:0051294	establishment of spindle orientation	15	1	0.07	14.2857	0.07179	0.521134
magenta	GO:0006865	amino acid transport	90	2	0.45	4.44444	0.07314	0.529281
magenta	GO:0015749	monosaccharide transport	90	2	0.45	4.44444	0.07314	0.529281
magenta	GO:0034728	nucleosome organization	90	2	0.45	4.44444	0.07314	0.529281
magenta	GO:0010467	gene expression	3722	24	18.43	1.30222	0.07516	0.540773
magenta	GO:0030518	intracellular steroid hormone receptor s...	92	2	0.46	4.34783	0.07598	0.545852
magenta	GO:0032479	regulation of type I interferon producti...	92	2	0.46	4.34783	0.07598	0.545852
magenta	GO:0006303	double-strand break repair via nonhomolo...	16	1	0.08	12.5	0.0764	0.548483
purple	GO:0006520	cellular amino acid metabolic process	368	18	1.89	9.52381	1.5e-13	4.60613e-11
purple	GO:0034976	response to endoplasmic reticulum stress	111	10	0.57	17.5439	1.9e-10	3.09225e-08
purple	GO:0019752	carboxylic acid metabolic process	685	19	3.52	5.39773	5.6e-10	8.68e-08
purple	GO:0015804	neutral amino acid transport	12	5	0.06	83.3333	2.3e-09	3.0936e-07
purple	GO:0006418	tRNA aminoacylation for protein translat...	47	7	0.24	29.1667	3.4e-09	4.35709e-07
purple	GO:0043436	oxoacid metabolic process	785	19	4.03	4.71464	5.4e-09	6.51e-07
purple	GO:0006082	organic acid metabolic process	791	19	4.06	4.6798	6.1e-09	7.29982e-07
purple	GO:0043038	amino acid activation	51	7	0.26	26.9231	6.2e-09	7.31196e-07
purple	GO:0043039	tRNA aminoacylation	51	7	0.26	26.9231	6.2e-09	7.31196e-07
purple	GO:0030968	endoplasmic reticulum unfolded protein r...	82	8	0.42	19.0476	7.7e-09	8.7026e-07
purple	GO:0034620	cellular response to unfolded protein	83	8	0.43	18.6047	8.5e-09	9.41071e-07
purple	GO:0008652	cellular amino acid biosynthetic process	85	8	0.44	18.1818	1e-08	1.06373e-06
purple	GO:0006986	response to unfolded protein	125	9	0.64	14.0625	1.2e-08	1.24395e-06
purple	GO:0035967	cellular response to topologically incor...	88	8	0.45	17.7778	1.4e-08	1.43302e-06
purple	GO:1901607	alpha-amino acid biosynthetic process	57	7	0.29	24.1379	1.4e-08	1.43302e-06
purple	GO:0035966	response to topologically incorrect prot...	132	9	0.68	13.2353	2e-08	2.00926e-06
purple	GO:0006984	ER-nucleus signaling pathway	93	8	0.48	16.6667	2.1e-08	2.09678e-06
purple	GO:1901605	alpha-amino acid metabolic process	165	9	0.85	10.5882	1.4e-07	1.09019e-05
purple	GO:0009070	serine family amino acid biosynthetic pr...	11	4	0.06	66.6667	2e-07	1.44027e-05
purple	GO:0006865	amino acid transport	90	7	0.46	15.2174	3.4e-07	2.24028e-05
purple	GO:0016053	organic acid biosynthetic process	223	9	1.14	7.89474	1.8e-06	9.41961e-05
purple	GO:0046394	carboxylic acid biosynthetic process	223	9	1.14	7.89474	1.8e-06	9.41961e-05
purple	GO:1901564	organonitrogen compound metabolic proces...	1377	21	7.07	2.9703	2e-06	0.000103662
purple	GO:0070059	intrinsic apoptotic signaling pathway in...	19	4	0.1	40	2.3e-06	0.000117712
purple	GO:0006399	tRNA metabolic process	122	7	0.63	11.1111	2.7e-06	0.000134381
purple	GO:0009069	serine family amino acid metabolic proce...	25	4	0.13	30.7692	7.3e-06	0.000321972
purple	GO:0015849	organic acid transport	148	7	0.76	9.21053	9.8e-06	0.000410013
purple	GO:0046942	carboxylic acid transport	148	7	0.76	9.21053	9.8e-06	0.000410013
purple	GO:0006987	activation of signaling protein activity...	61	5	0.31	16.129	1.4e-05	0.000551695
purple	GO:0032075	positive regulation of nuclease activity	63	5	0.32	15.625	1.7e-05	0.000651
purple	GO:0006820	anion transport	232	8	1.19	6.72269	2.2e-05	0.000817466
purple	GO:0032069	regulation of nuclease activity	67	5	0.34	14.7059	2.3e-05	0.000850739
purple	GO:0044283	small molecule biosynthetic process	340	9	1.74	5.17241	5.2e-05	0.00179682
purple	GO:0044711	single-organism biosynthetic process	344	9	1.77	5.08475	5.7e-05	0.00195712
purple	GO:0046653	tetrahydrofolate metabolic process	16	3	0.08	37.5	6.8e-05	0.0022913
purple	GO:0015711	organic anion transport	205	7	1.05	6.66667	8e-05	0.00265173
purple	GO:0044281	small molecule metabolic process	2053	23	10.53	2.18424	9.7e-05	0.00315735
purple	GO:0006094	gluconeogenesis	49	4	0.25	16	0.00011	0.00353107
purple	GO:0019319	hexose biosynthetic process	53	4	0.27	14.8148	0.00015	0.00461484
purple	GO:0006760	folic acid-containing compound metabolic...	22	3	0.11	27.2727	0.00018	0.00536538
purple	GO:0046364	monosaccharide biosynthetic process	58	4	0.3	13.3333	0.00022	0.00640519
purple	GO:1901566	organonitrogen compound biosynthetic pro...	509	10	2.61	3.83142	0.00023	0.00667246
purple	GO:0006811	ion transport	738	12	3.79	3.16623	0.0003	0.00846187
purple	GO:0006730	one-carbon metabolic process	27	3	0.14	21.4286	0.00034	0.00945897
purple	GO:0042558	pteridine-containing compound metabolic ...	28	3	0.14	21.4286	0.00038	0.0103941
purple	GO:0044710	single-organism metabolic process	2453	24	12.59	1.90627	0.00055	0.0141634
purple	GO:0055085	transmembrane transport	571	10	2.93	3.41297	0.00058	0.0147262
purple	GO:0034660	ncRNA metabolic process	289	7	1.48	4.72973	0.00065	0.0161755
purple	GO:0010243	response to organonitrogen compound	478	9	2.45	3.67347	0.00067	0.0165718
purple	GO:0010033	response to organic substance	1588	18	8.15	2.20859	0.00068	0.0167175
purple	GO:0009725	response to hormone stimulus	497	9	2.55	3.52941	0.00088	0.0206369
purple	GO:0009063	cellular amino acid catabolic process	87	4	0.45	8.88889	0.00101	0.0230221
purple	GO:1901698	response to nitrogen compound	511	9	2.62	3.43511	0.00108	0.0240781
purple	GO:0097305	response to alcohol	156	5	0.8	6.25	0.00119	0.0262074
purple	GO:0043649	dicarboxylic acid catabolic process	12	2	0.06	33.3333	0.00165	0.0343838
purple	GO:0006412	translation	455	8	2.33	3.43348	0.00211	0.0413738
purple	GO:0000097	sulfur amino acid biosynthetic process	14	2	0.07	28.5714	0.00226	0.0435284
purple	GO:0006103	2-oxoglutarate metabolic process	14	2	0.07	28.5714	0.00226	0.0435284
purple	GO:0009067	aspartate family amino acid biosynthetic...	14	2	0.07	28.5714	0.00226	0.0435284
purple	GO:0009058	biosynthetic process	4307	33	22.1	1.49321	0.00261	0.048825
purple	GO:0006915	apoptotic process	1236	14	6.34	2.2082	0.0032	0.0574834
purple	GO:0012501	programmed cell death	1248	14	6.4	2.1875	0.0035	0.0614482
purple	GO:0008219	cell death	1400	15	7.18	2.08914	0.00379	0.0656194
purple	GO:0016265	death	1403	15	7.2	2.08333	0.00387	0.0665018
purple	GO:0043648	dicarboxylic acid metabolic process	63	3	0.32	9.375	0.00409	0.0688363
purple	GO:0019318	hexose metabolic process	208	5	1.07	4.6729	0.00417	0.0698937
purple	GO:0009719	response to endogenous stimulus	877	11	4.5	2.44444	0.00445	0.0736014
purple	GO:0014070	response to organic cyclic compound	405	7	2.08	3.36538	0.00446	0.0736919
purple	GO:0051186	cofactor metabolic process	213	5	1.09	4.58716	0.00461	0.0752535
purple	GO:1901606	alpha-amino acid catabolic process	66	3	0.34	8.82353	0.00466	0.0759174
purple	GO:0016051	carbohydrate biosynthetic process	134	4	0.69	5.7971	0.00488	0.0784028
purple	GO:1901700	response to oxygen-containing compound	767	10	3.94	2.53807	0.00517	0.081375
purple	GO:0015698	inorganic anion transport	22	2	0.11	18.1818	0.0056	0.086635
purple	GO:0055081	anion homeostasis	22	2	0.11	18.1818	0.0056	0.086635
purple	GO:0005996	monosaccharide metabolic process	226	5	1.16	4.31034	0.00591	0.0904847
purple	GO:0071705	nitrogen compound transport	434	7	2.23	3.13901	0.00648	0.0964004
purple	GO:0071310	cellular response to organic substance	1199	13	6.15	2.11382	0.00668	0.0986543
purple	GO:0006575	cellular modified amino acid metabolic p...	147	4	0.75	5.33333	0.00676	0.0993848
purple	GO:0001932	regulation of protein phosphorylation	676	9	3.47	2.59366	0.00705	0.101971
purple	GO:0044249	cellular biosynthetic process	4180	31	21.45	1.44522	0.00728	0.104298
purple	GO:0050878	regulation of body fluid levels	444	7	2.28	3.07018	0.00731	0.104543
purple	GO:0045860	positive regulation of protein kinase ac...	337	6	1.73	3.46821	0.00736	0.105166
purple	GO:0006468	protein phosphorylation	940	11	4.82	2.28216	0.00746	0.106129
purple	GO:0050801	ion homeostasis	341	6	1.75	3.42857	0.00778	0.109722
purple	GO:0001934	positive regulation of protein phosphory...	452	7	2.32	3.01724	0.00803	0.112759
purple	GO:0097190	apoptotic signaling pathway	352	6	1.81	3.31492	0.00903	0.122774
purple	GO:0016054	organic acid catabolic process	160	4	0.82	4.87805	0.00906	0.122774
purple	GO:0046395	carboxylic acid catabolic process	160	4	0.82	4.87805	0.00906	0.122774
purple	GO:0042327	positive regulation of phosphorylation	463	7	2.38	2.94118	0.00911	0.123246
purple	GO:0006874	cellular calcium ion homeostasis	161	4	0.83	4.81928	0.00925	0.124726
purple	GO:1901576	organic substance biosynthetic process	4251	31	21.81	1.42137	0.00961	0.127885
purple	GO:0033674	positive regulation of kinase activity	357	6	1.83	3.27869	0.00964	0.128074
purple	GO:0045931	positive regulation of mitotic cell cycl...	30	2	0.15	13.3333	0.01026	0.134337
purple	GO:0050900	leukocyte migration	168	4	0.86	4.65116	0.0107	0.13887
purple	GO:0051347	positive regulation of transferase activ...	366	6	1.88	3.19149	0.01082	0.139906
purple	GO:0042325	regulation of phosphorylation	724	9	3.72	2.41935	0.01084	0.139906
purple	GO:0055074	calcium ion homeostasis	169	4	0.87	4.5977	0.01092	0.140639
purple	GO:0009066	aspartate family amino acid metabolic pr...	31	2	0.16	12.5	0.01094	0.140639
purple	GO:0006732	coenzyme metabolic process	170	4	0.87	4.5977	0.01114	0.142295
purple	GO:0006873	cellular ion homeostasis	264	5	1.35	3.7037	0.01118	0.142295
purple	GO:0072503	cellular divalent inorganic cation homeo...	171	4	0.88	4.54545	0.01137	0.143811
purple	GO:0097193	intrinsic apoptotic signaling pathway	173	4	0.89	4.49438	0.01182	0.14741
purple	GO:0006006	glucose metabolic process	175	4	0.9	4.44444	0.01229	0.151415
purple	GO:0031401	positive regulation of protein modificat...	612	8	3.14	2.54777	0.0123	0.151424
purple	GO:0032092	positive regulation of protein binding	34	2	0.17	11.7647	0.01306	0.156865
purple	GO:0044267	cellular protein metabolic process	2902	23	14.89	1.54466	0.01315	0.157597
purple	GO:0072507	divalent inorganic cation homeostasis	180	4	0.92	4.34783	0.01352	0.160261
purple	GO:0043434	response to peptide hormone stimulus	277	5	1.42	3.52113	0.01354	0.160264
purple	GO:0051345	positive regulation of hydrolase activit...	386	6	1.98	3.0303	0.0138	0.162162
purple	GO:0042981	regulation of apoptotic process	887	10	4.55	2.1978	0.01384	0.162515
purple	GO:0019725	cellular homeostasis	390	6	2	3	0.01446	0.167619
purple	GO:0009612	response to mechanical stimulus	100	3	0.51	5.88235	0.01458	0.168885
purple	GO:0043067	regulation of programmed cell death	895	10	4.59	2.17865	0.01467	0.169209
purple	GO:1901652	response to peptide	284	5	1.46	3.42466	0.01495	0.172073
purple	GO:0010562	positive regulation of phosphorus metabo...	510	7	2.62	2.67176	0.01495	0.172073
purple	GO:0045937	positive regulation of phosphate metabol...	510	7	2.62	2.67176	0.01495	0.172073
purple	GO:0006807	nitrogen compound metabolic process	4965	34	25.48	1.33438	0.01629	0.18134
purple	GO:0000096	sulfur amino acid metabolic process	39	2	0.2	10	0.01698	0.187356
purple	GO:0045859	regulation of protein kinase activity	524	7	2.69	2.60223	0.01712	0.188645
purple	GO:0010941	regulation of cell death	922	10	4.73	2.11416	0.01776	0.192953
purple	GO:0016310	phosphorylation	1073	11	5.51	1.99637	0.01897	0.202346
purple	GO:0032870	cellular response to hormone stimulus	302	5	1.55	3.22581	0.01901	0.202346
purple	GO:0007631	feeding behavior	42	2	0.22	9.09091	0.01953	0.206934
purple	GO:0006950	response to stress	2322	19	11.92	1.59396	0.01956	0.206982
purple	GO:0042221	response to chemical stimulus	2170	18	11.14	1.6158	0.02067	0.214818
purple	GO:0044282	small molecule catabolic process	206	4	1.06	3.77358	0.02112	0.217963
purple	GO:0044712	single-organism catabolic process	206	4	1.06	3.77358	0.02112	0.217963
purple	GO:0043549	regulation of kinase activity	553	7	2.84	2.46479	0.02231	0.22651
purple	GO:0055082	cellular chemical homeostasis	316	5	1.62	3.08642	0.02262	0.228943
purple	GO:0007586	digestion	47	2	0.24	8.33333	0.02413	0.240487
purple	GO:0019233	sensory perception of pain	47	2	0.24	8.33333	0.02413	0.240487
purple	GO:0032270	positive regulation of cellular protein ...	695	8	3.57	2.2409	0.02461	0.244075
purple	GO:0051188	cofactor biosynthetic process	123	3	0.63	4.7619	0.02513	0.247372
purple	GO:0051338	regulation of transferase activity	571	7	2.93	2.38908	0.02604	0.254535
purple	GO:0006812	cation transport	447	6	2.29	2.62009	0.02636	0.256584
purple	GO:0009064	glutamine family amino acid metabolic pr...	50	2	0.26	7.69231	0.02708	0.2615
purple	GO:0051289	protein homotetramerization	50	2	0.26	7.69231	0.02708	0.2615
purple	GO:0051246	regulation of protein metabolic process	1284	12	6.59	1.82094	0.02754	0.264902
purple	GO:0071375	cellular response to peptide hormone sti...	224	4	1.15	3.47826	0.02767	0.265524
purple	GO:1901653	cellular response to peptide	224	4	1.15	3.47826	0.02767	0.265524
purple	GO:0050890	cognition	129	3	0.66	4.54545	0.02841	0.270647
purple	GO:0070887	cellular response to chemical stimulus	1452	13	7.45	1.74497	0.02981	0.280276
purple	GO:0006875	cellular metal ion homeostasis	235	4	1.21	3.30579	0.03221	0.291718
purple	GO:0019538	protein metabolic process	3314	24	17.01	1.41093	0.03243	0.292446
purple	GO:0019220	regulation of phosphate metabolic proces...	1021	10	5.24	1.9084	0.03333	0.298375
purple	GO:0051174	regulation of phosphorus metabolic proce...	1033	10	5.3	1.88679	0.03573	0.314838
purple	GO:0048878	chemical homeostasis	481	6	2.47	2.42915	0.03594	0.315251
purple	GO:0043085	positive regulation of catalytic activit...	750	8	3.85	2.07792	0.0365	0.317601
purple	GO:0007589	body fluid secretion	59	2	0.3	6.66667	0.03673	0.318311
purple	GO:0031399	regulation of protein modification proce...	895	9	4.59	1.96078	0.03734	0.321369
purple	GO:0018108	peptidyl-tyrosine phosphorylation	144	3	0.74	4.05405	0.03755	0.323005
purple	GO:0051099	positive regulation of binding	60	2	0.31	6.45161	0.03787	0.324221
purple	GO:0051247	positive regulation of protein metabolic...	756	8	3.88	2.06186	0.038	0.324221
purple	GO:0018212	peptidyl-tyrosine modification	146	3	0.75	4	0.03887	0.328968
purple	GO:0045471	response to ethanol	61	2	0.31	6.45161	0.03903	0.329638
purple	GO:0044093	positive regulation of molecular functio...	905	9	4.64	1.93966	0.03968	0.332787
purple	GO:0034641	cellular nitrogen compound metabolic pro...	4679	31	24.01	1.29113	0.04124	0.342439
purple	GO:0007270	neuron-neuron synaptic transmission	63	2	0.32	6.25	0.04139	0.343334
purple	GO:0048015	phosphatidylinositol-mediated signaling	150	3	0.77	3.8961	0.04158	0.343859
purple	GO:0048017	inositol lipid-mediated signaling	150	3	0.77	3.8961	0.04158	0.343859
purple	GO:0030003	cellular cation homeostasis	257	4	1.32	3.0303	0.04254	0.350703
purple	GO:0043200	response to amino acid stimulus	64	2	0.33	6.06061	0.04258	0.350703
purple	GO:0007596	blood coagulation	375	5	1.92	2.60417	0.04268	0.351171
purple	GO:0007599	hemostasis	377	5	1.93	2.59067	0.0435	0.356297
purple	GO:0050817	coagulation	378	5	1.94	2.57732	0.04392	0.358834
purple	GO:0033993	response to lipid	379	5	1.94	2.57732	0.04434	0.36154
purple	GO:0009628	response to abiotic stimulus	649	7	3.33	2.1021	0.04714	0.379428
purple	GO:0007612	learning	68	2	0.35	5.71429	0.0475	0.382137
purple	GO:0055065	metal ion homeostasis	271	4	1.39	2.8777	0.04999	0.398037
purple	GO:0000098	sulfur amino acid catabolic process	10	1	0.05	20	0.05017	0.398265
purple	GO:0009086	methionine biosynthetic process	10	1	0.05	20	0.05017	0.398265
purple	GO:0018065	protein-cofactor linkage	10	1	0.05	20	0.05017	0.398265
purple	GO:0021889	olfactory bulb interneuron differentiati...	10	1	0.05	20	0.05017	0.398265
purple	GO:0045822	negative regulation of heart contraction	10	1	0.05	20	0.05017	0.398265
purple	GO:0065008	regulation of biological quality	2225	17	11.42	1.48862	0.05065	0.40016
purple	GO:0043279	response to alkaloid	71	2	0.36	5.55556	0.05132	0.404471
purple	GO:0042592	homeostatic process	804	8	4.13	1.93705	0.05153	0.405145
purple	GO:0006816	calcium ion transport	168	3	0.86	3.48837	0.05493	0.425547
purple	GO:0002675	positive regulation of acute inflammator...	11	1	0.06	16.6667	0.05504	0.425547
purple	GO:0006821	chloride transport	11	1	0.06	16.6667	0.05504	0.425547
purple	GO:0007214	gamma-aminobutyric acid signaling pathwa...	11	1	0.06	16.6667	0.05504	0.425547
purple	GO:0009299	mRNA transcription	11	1	0.06	16.6667	0.05504	0.425547
purple	GO:0032354	response to follicle-stimulating hormone...	11	1	0.06	16.6667	0.05504	0.425547
purple	GO:0032757	positive regulation of interleukin-8 pro...	11	1	0.06	16.6667	0.05504	0.425547
purple	GO:0042219	cellular modified amino acid catabolic p...	11	1	0.06	16.6667	0.05504	0.425547
purple	GO:0044058	regulation of digestive system process	11	1	0.06	16.6667	0.05504	0.425547
purple	GO:0045922	negative regulation of fatty acid metabo...	11	1	0.06	16.6667	0.05504	0.425547
purple	GO:0051187	cofactor catabolic process	11	1	0.06	16.6667	0.05504	0.425547
purple	GO:0008033	tRNA processing	74	2	0.38	5.26316	0.05524	0.426688
purple	GO:0006767	water-soluble vitamin metabolic process	75	2	0.38	5.26316	0.05657	0.434897
purple	GO:2001236	regulation of extrinsic apoptotic signal...	75	2	0.38	5.26316	0.05657	0.434897
purple	GO:0051262	protein tetramerization	76	2	0.39	5.12821	0.05791	0.441652
purple	GO:0032869	cellular response to insulin stimulus	172	3	0.88	3.40909	0.05815	0.442564
purple	GO:0001101	response to acid	77	2	0.4	5	0.05927	0.449916
purple	GO:0003333	amino acid transmembrane transport	12	1	0.06	16.6667	0.0599	0.452663
purple	GO:0006544	glycine metabolic process	12	1	0.06	16.6667	0.0599	0.452663
purple	GO:0010762	regulation of fibroblast migration	12	1	0.06	16.6667	0.0599	0.452663
purple	GO:0030852	regulation of granulocyte differentiatio...	12	1	0.06	16.6667	0.0599	0.452663
purple	GO:0046697	decidualization	12	1	0.06	16.6667	0.0599	0.452663
[truncated: 601 more rows]

## Sheet: ApP - IR
module	GO.ID	Term	Annotated	Significant	Expected	fold_enrichment	classic	BH
yellow	GO:0006281	DNA repair	393	42	16.63	2.52556	2.6e-08	1.19534e-06
yellow	GO:0006974	response to DNA damage stimulus	612	53	25.89	2.04712	4.4e-07	1.69692e-05
yellow	GO:0000278	mitotic cell cycle	771	58	32.62	1.77805	1.1e-05	0.000337783
yellow	GO:0022402	cell cycle process	1011	71	42.78	1.65965	1.2e-05	0.00036573
yellow	GO:0006259	DNA metabolic process	764	57	32.33	1.76307	1.7e-05	0.000503045
yellow	GO:0000724	double-strand break repair via homologou...	58	11	2.45	4.4898	2.6e-05	0.000746296
yellow	GO:0000725	recombinational repair	59	11	2.5	4.4	3.1e-05	0.000872881
yellow	GO:0033554	cellular response to stress	1139	76	48.19	1.57709	3.4e-05	0.00095241
yellow	GO:0007049	cell cycle	1321	83	55.89	1.48506	0.00012	0.00286784
yellow	GO:0006260	DNA replication	247	24	10.45	2.29665	0.00013	0.00305744
yellow	GO:0006310	DNA recombination	194	20	8.21	2.43605	0.00021	0.00460613
yellow	GO:0006261	DNA-dependent DNA replication	97	13	4.1	3.17073	0.00021	0.00460613
yellow	GO:0090304	nucleic acid metabolic process	3758	194	159.01	1.22005	0.00035	0.00708489
yellow	GO:0006302	double-strand break repair	119	14	5.04	2.77778	0.00049	0.00942642
yellow	GO:0000738	DNA catabolic process, exonucleolytic	10	4	0.42	9.52381	0.00054	0.0101484
yellow	GO:0051028	mRNA transport	112	13	4.74	2.74262	0.00088	0.0151235
yellow	GO:0006996	organelle organization	2102	116	88.94	1.30425	0.00095	0.016022
yellow	GO:0050657	nucleic acid transport	128	14	5.42	2.58303	0.00102	0.0168191
yellow	GO:0050658	RNA transport	128	14	5.42	2.58303	0.00102	0.0168191
yellow	GO:0051236	establishment of RNA localization	128	14	5.42	2.58303	0.00102	0.0168191
yellow	GO:0044772	mitotic cell cycle phase transition	373	29	15.78	1.83777	0.00115	0.0184397
yellow	GO:0000018	regulation of DNA recombination	40	7	1.69	4.14201	0.00129	0.0201485
yellow	GO:0015931	nucleobase-containing compound transport	146	15	6.18	2.42718	0.0013	0.0202658
yellow	GO:0006289	nucleotide-excision repair	76	10	3.22	3.10559	0.0013	0.0202658
yellow	GO:0044770	cell cycle phase transition	436	32	18.45	1.73442	0.00169	0.0244922
yellow	GO:0006997	nucleus organization	79	10	3.34	2.99401	0.00175	0.0251601
yellow	GO:0006403	RNA localization	136	14	5.75	2.43478	0.00183	0.0258535
yellow	GO:0006399	tRNA metabolic process	122	13	5.16	2.51938	0.00193	0.0267098
yellow	GO:0009067	aspartate family amino acid biosynthetic...	14	4	0.59	6.77966	0.00226	0.0299768
yellow	GO:0044786	cell cycle DNA replication	33	6	1.4	4.28571	0.00232	0.0304992
yellow	GO:0070588	calcium ion transmembrane transport	33	6	1.4	4.28571	0.00232	0.0304992
yellow	GO:0000280	nuclear division	325	25	13.75	1.81818	0.00285	0.0350595
yellow	GO:0007067	mitosis	325	25	13.75	1.81818	0.00285	0.0350595
yellow	GO:0006312	mitotic recombination	35	6	1.48	4.05405	0.00317	0.0376857
yellow	GO:0051325	interphase	225	19	9.52	1.9958	0.00323	0.0380103
yellow	GO:0000722	telomere maintenance via recombination	25	5	1.06	4.71698	0.00349	0.0399737
yellow	GO:0006405	RNA export from nucleus	73	9	3.09	2.91262	0.00352	0.0401176
yellow	GO:0032387	negative regulation of intracellular tra...	73	9	3.09	2.91262	0.00352	0.0401176
yellow	GO:0022403	cell cycle phase	247	20	10.45	1.91388	0.00412	0.0442594
yellow	GO:0033260	nuclear cell cycle DNA replication	26	5	1.1	4.54545	0.00418	0.0447268
yellow	GO:0007077	mitotic nuclear envelope disassembly	37	6	1.57	3.82166	0.00423	0.0451431
yellow	GO:0051168	nuclear export	120	12	5.08	2.3622	0.00479	0.0492154
yellow	GO:0051052	regulation of DNA metabolic process	184	16	7.79	2.05392	0.00499	0.0508212
yellow	GO:0030397	membrane disassembly	39	6	1.65	3.63636	0.00553	0.0545459
yellow	GO:0051081	nuclear envelope disassembly	39	6	1.65	3.63636	0.00553	0.0545459
yellow	GO:0051329	interphase of mitotic cell cycle	221	18	9.35	1.92513	0.00596	0.0571591
yellow	GO:0000226	microtubule cytoskeleton organization	273	21	11.55	1.81818	0.006	0.0572056
yellow	GO:0006338	chromatin remodeling	95	10	4.02	2.48756	0.00676	0.061645
yellow	GO:0006396	RNA processing	633	40	26.78	1.49365	0.00701	0.0626168
yellow	GO:0001823	mesonephros development	10	3	0.42	7.14286	0.00723	0.0637423
yellow	GO:0006999	nuclear pore organization	10	3	0.42	7.14286	0.00723	0.0637423
yellow	GO:0009086	methionine biosynthetic process	10	3	0.42	7.14286	0.00723	0.0637423
yellow	GO:0048285	organelle fission	350	25	14.81	1.68805	0.00734	0.064225
yellow	GO:0006998	nuclear envelope organization	54	7	2.28	3.07018	0.00735	0.0642779
yellow	GO:0001510	RNA methylation	19	4	0.8	5	0.00739	0.0645237
yellow	GO:0006297	nucleotide-excision repair, DNA gap fill...	19	4	0.8	5	0.00739	0.0645237
yellow	GO:0031572	G2 DNA damage checkpoint	30	5	1.27	3.93701	0.00788	0.0674984
yellow	GO:0051298	centrosome duplication	30	5	1.27	3.93701	0.00788	0.0674984
yellow	GO:0007098	centrosome cycle	42	6	1.78	3.37079	0.00799	0.0678337
yellow	GO:0046823	negative regulation of nucleocytoplasmic...	55	7	2.33	3.00429	0.00813	0.0685219
yellow	GO:0006139	nucleobase-containing compound metabolic...	4389	211	185.71	1.13618	0.0087	0.0718379
yellow	GO:0051276	chromosome organization	643	40	27.21	1.47005	0.00902	0.0737691
yellow	GO:0009066	aspartate family amino acid metabolic pr...	31	5	1.31	3.81679	0.00907	0.0740664
yellow	GO:0000082	G1/S transition of mitotic cell cycle	197	16	8.34	1.91847	0.00946	0.0762941
yellow	GO:0006356	regulation of transcription from RNA pol...	11	3	0.47	6.38298	0.00963	0.0769407
yellow	GO:2000104	negative regulation of DNA-dependent DNA...	11	3	0.47	6.38298	0.00963	0.0769407
yellow	GO:0045839	negative regulation of mitosis	44	6	1.86	3.22581	0.01002	0.0787804
yellow	GO:0051784	negative regulation of nuclear division	44	6	1.86	3.22581	0.01002	0.0787804
yellow	GO:0002312	B cell activation involved in immune res...	32	5	1.35	3.7037	0.01039	0.0804459
yellow	GO:0042992	negative regulation of transcription fac...	33	5	1.4	3.57143	0.01183	0.0880756
yellow	GO:0006283	transcription-coupled nucleotide-excisio...	46	6	1.95	3.07692	0.01239	0.0913671
yellow	GO:0006400	tRNA modification	22	4	0.93	4.30108	0.01262	0.0925916
yellow	GO:0008033	tRNA processing	74	8	3.13	2.55591	0.01263	0.0925916
yellow	GO:0030307	positive regulation of cell growth	74	8	3.13	2.55591	0.01263	0.0925916
yellow	GO:0006360	transcription from RNA polymerase I prom...	34	5	1.44	3.47222	0.0134	0.096115
yellow	GO:0051297	centrosome organization	61	7	2.58	2.71318	0.01408	0.0994152
yellow	GO:0006725	cellular aromatic compound metabolic pro...	4506	214	190.66	1.12242	0.01449	0.101343
yellow	GO:0016070	RNA metabolic process	3311	162	140.09	1.1564	0.0145	0.101369
yellow	GO:0006397	mRNA processing	390	26	16.5	1.57576	0.01465	0.102067
yellow	GO:0032201	telomere maintenance via semi-conservati...	23	4	0.97	4.12371	0.01478	0.102665
yellow	GO:0070509	calcium ion import	23	4	0.97	4.12371	0.01478	0.102665
yellow	GO:2000779	regulation of double-strand break repair	23	4	0.97	4.12371	0.01478	0.102665
yellow	GO:0042308	negative regulation of protein import in...	48	6	2.03	2.95567	0.01512	0.104403
yellow	GO:0051301	cell division	449	29	19	1.52632	0.01536	0.105612
yellow	GO:0008380	RNA splicing	317	22	13.41	1.64057	0.01561	0.1067
yellow	GO:0006555	methionine metabolic process	13	3	0.55	5.45455	0.01568	0.106756
yellow	GO:0007099	centriole replication	13	3	0.55	5.45455	0.01568	0.106756
yellow	GO:0010569	regulation of double-strand break repair...	13	3	0.55	5.45455	0.01568	0.106756
yellow	GO:0032483	regulation of Rab protein signal transdu...	13	3	0.55	5.45455	0.01568	0.106756
yellow	GO:0045005	maintenance of fidelity involved in DNA-...	13	3	0.55	5.45455	0.01568	0.106756
yellow	GO:0034641	cellular nitrogen compound metabolic pro...	4679	221	197.98	1.11627	0.01605	0.108387
yellow	GO:0010564	regulation of cell cycle process	394	26	16.67	1.55969	0.01649	0.110579
yellow	GO:0006308	DNA catabolic process	63	7	2.67	2.62172	0.01662	0.110981
yellow	GO:0006406	mRNA export from nucleus	63	7	2.67	2.62172	0.01662	0.110981
yellow	GO:0090317	negative regulation of intracellular pro...	63	7	2.67	2.62172	0.01662	0.110981
yellow	GO:0032886	regulation of microtubule-based process	94	9	3.98	2.26131	0.01778	0.115517
yellow	GO:0044260	cellular macromolecule metabolic process	5654	262	239.23	1.09518	0.01779	0.115536
yellow	GO:0046483	heterocycle metabolic process	4505	213	190.61	1.11746	0.01819	0.117617
yellow	GO:0006473	protein acetylation	127	11	5.37	2.04842	0.01871	0.119388
yellow	GO:0034645	cellular macromolecule biosynthetic proc...	3494	169	147.84	1.14313	0.01878	0.119473
yellow	GO:0007283	spermatogenesis	249	18	10.54	1.70778	0.01882	0.119553
yellow	GO:0006513	protein monoubiquitination	37	5	1.57	3.18471	0.01893	0.119958
yellow	GO:0000097	sulfur amino acid biosynthetic process	14	3	0.59	5.08475	0.01934	0.121188
yellow	GO:0032482	Rab protein signal transduction	14	3	0.59	5.08475	0.01934	0.121188
yellow	GO:0035510	DNA dealkylation	14	3	0.59	5.08475	0.01934	0.121188
yellow	GO:0045737	positive regulation of cyclin-dependent ...	14	3	0.59	5.08475	0.01934	0.121188
yellow	GO:0031023	microtubule organizing center organizati...	65	7	2.75	2.54545	0.01947	0.121501
yellow	GO:0048232	male gamete generation	250	18	10.58	1.70132	0.01952	0.121673
yellow	GO:0007059	chromosome segregation	145	12	6.14	1.9544	0.02	0.123529
yellow	GO:0043543	protein acylation	146	12	6.18	1.94175	0.02099	0.127007
yellow	GO:0006284	base-excision repair	38	5	1.61	3.10559	0.02107	0.127301
yellow	GO:0006913	nucleocytoplasmic transport	308	21	13.03	1.61167	0.02133	0.128193
yellow	GO:0045927	positive regulation of growth	114	10	4.82	2.07469	0.02248	0.132415
yellow	GO:0090329	regulation of DNA-dependent DNA replicat...	26	4	1.1	3.63636	0.02259	0.132966
yellow	GO:1900087	positive regulation of G1/S transition o...	15	3	0.63	4.7619	0.02343	0.136148
yellow	GO:0032088	negative regulation of NF-kappaB transcr...	53	6	2.24	2.67857	0.02374	0.137059
yellow	GO:0030001	metal ion transport	369	24	15.61	1.53748	0.02414	0.138581
yellow	GO:0051169	nuclear transport	312	21	13.2	1.59091	0.02419	0.138677
yellow	GO:0034599	cellular response to oxidative stress	100	9	4.23	2.12766	0.02552	0.143666
yellow	GO:2001020	regulation of response to DNA damage sti...	100	9	4.23	2.12766	0.02552	0.143666
yellow	GO:0006282	regulation of DNA repair	54	6	2.28	2.63158	0.02579	0.144343
yellow	GO:0044265	cellular macromolecule catabolic process	690	40	29.2	1.36986	0.02591	0.14466
yellow	GO:0006816	calcium ion transport	168	13	7.11	1.82841	0.02604	0.145336
yellow	GO:0051254	positive regulation of RNA metabolic pro...	856	48	36.22	1.32523	0.02649	0.146791
yellow	GO:0007346	regulation of mitotic cell cycle	278	19	11.76	1.61565	0.02706	0.14939
yellow	GO:0006301	postreplication repair	16	3	0.68	4.41176	0.02795	0.15251
yellow	GO:0010812	negative regulation of cell-substrate ad...	28	4	1.18	3.38983	0.02896	0.155604
yellow	GO:0009059	macromolecule biosynthetic process	3562	170	150.71	1.12799	0.02979	0.158656
yellow	GO:0045893	positive regulation of transcription, DN...	801	45	33.89	1.32783	0.03027	0.16068
yellow	GO:0071312	cellular response to alkaloid	17	3	0.72	4.16667	0.0329	0.170037
yellow	GO:0009451	RNA modification	73	7	3.09	2.26537	0.03426	0.17284
yellow	GO:1901360	organic cyclic compound metabolic proces...	4644	216	196.5	1.09924	0.03505	0.175628
yellow	GO:0031396	regulation of protein ubiquitination	176	13	7.45	1.74497	0.0361	0.179617
yellow	GO:0070838	divalent metal ion transport	176	13	7.45	1.74497	0.0361	0.179617
yellow	GO:0000289	nuclear-transcribed mRNA poly(A) tail sh...	30	4	1.27	3.14961	0.0363	0.180095
yellow	GO:0071897	DNA biosynthetic process	30	4	1.27	3.14961	0.0363	0.180095
yellow	GO:0043170	macromolecule metabolic process	6064	276	256.58	1.07569	0.03634	0.180095
yellow	GO:0032507	maintenance of protein location in cell	90	8	3.81	2.09974	0.0364	0.180338
yellow	GO:0010467	gene expression	3722	176	157.48	1.1176	0.03683	0.181859
yellow	GO:0034660	ncRNA metabolic process	289	19	12.23	1.55356	0.03802	0.18554
yellow	GO:0030890	positive regulation of B cell proliferat...	18	3	0.76	3.94737	0.03827	0.185979
yellow	GO:0031122	cytoplasmic microtubule organization	18	3	0.76	3.94737	0.03827	0.185979
yellow	GO:0042994	cytoplasmic sequestering of transcriptio...	18	3	0.76	3.94737	0.03827	0.185979
yellow	GO:0046718	viral entry into host cell	18	3	0.76	3.94737	0.03827	0.185979
yellow	GO:0072511	divalent inorganic cation transport	178	13	7.53	1.72643	0.03899	0.187069
yellow	GO:0045935	positive regulation of nucleobase-contai...	944	51	39.94	1.27692	0.04062	0.192177
yellow	GO:0007017	microtubule-based process	409	25	17.31	1.44425	0.04131	0.193846
yellow	GO:0043412	macromolecule modification	2303	113	97.44	1.15969	0.04174	0.195487
yellow	GO:0001818	negative regulation of cytokine producti...	93	8	3.94	2.03046	0.04293	0.198942
yellow	GO:0009411	response to UV	93	8	3.94	2.03046	0.04293	0.198942
yellow	GO:0034614	cellular response to reactive oxygen spe...	61	6	2.58	2.32558	0.04343	0.20046
yellow	GO:0070507	regulation of microtubule cytoskeleton o...	77	7	3.26	2.14724	0.04389	0.202114
yellow	GO:0000959	mitochondrial RNA metabolic process	19	3	0.8	3.75	0.04406	0.202678
yellow	GO:0045773	positive regulation of axon extension	19	3	0.8	3.75	0.04406	0.202678
yellow	GO:0051491	positive regulation of filopodium assemb...	19	3	0.8	3.75	0.04406	0.202678
yellow	GO:0050871	positive regulation of B cell activation	32	4	1.35	2.96296	0.04461	0.203883
yellow	GO:0071300	cellular response to retinoic acid	32	4	1.35	2.96296	0.04461	0.203883
yellow	GO:0010948	negative regulation of cell cycle proces...	257	17	10.87	1.56394	0.04566	0.207285
yellow	GO:1901987	regulation of cell cycle phase transitio...	257	17	10.87	1.56394	0.04566	0.207285
yellow	GO:0006418	tRNA aminoacylation for protein translat...	47	5	1.99	2.51256	0.04739	0.211816
yellow	GO:0008156	negative regulation of DNA replication	33	4	1.4	2.85714	0.04914	0.217265
yellow	GO:0032480	negative regulation of type I interferon...	33	4	1.4	2.85714	0.04914	0.217265
yellow	GO:0006595	polyamine metabolic process	20	3	0.85	3.52941	0.05026	0.220834
yellow	GO:0051646	mitochondrion localization	20	3	0.85	3.52941	0.05026	0.220834
yellow	GO:0000723	telomere maintenance	64	6	2.71	2.21402	0.05285	0.228334
yellow	GO:0048639	positive regulation of developmental gro...	34	4	1.44	2.77778	0.0539	0.230648
yellow	GO:0051173	positive regulation of nitrogen compound...	963	51	40.75	1.25153	0.05449	0.232506
yellow	GO:0010557	positive regulation of macromolecule bio...	942	50	39.86	1.25439	0.05479	0.233248
yellow	GO:0032200	telomere organization	65	6	2.75	2.18182	0.05624	0.237846
yellow	GO:0030260	entry into host cell	21	3	0.89	3.37079	0.05686	0.239052
yellow	GO:0044409	entry into host	21	3	0.89	3.37079	0.05686	0.239052
yellow	GO:0051806	entry into cell of other organism involv...	21	3	0.89	3.37079	0.05686	0.239052
yellow	GO:0051828	entry into other organism involved in sy...	21	3	0.89	3.37079	0.05686	0.239052
yellow	GO:0052126	movement in host environment	21	3	0.89	3.37079	0.05686	0.239052
yellow	GO:0052192	movement in environment of other organis...	21	3	0.89	3.37079	0.05686	0.239052
yellow	GO:0006325	chromatin organization	484	28	20.48	1.36719	0.05735	0.240188
yellow	GO:0006275	regulation of DNA replication	82	7	3.47	2.01729	0.05816	0.242024
yellow	GO:0043433	negative regulation of sequence-specific...	99	8	4.19	1.90931	0.05822	0.242026
yellow	GO:0051651	maintenance of location in cell	99	8	4.19	1.90931	0.05822	0.242026
yellow	GO:0010628	positive regulation of gene expression	861	46	36.43	1.2627	0.05847	0.242289
yellow	GO:0034109	homotypic cell-cell adhesion	35	4	1.48	2.7027	0.05891	0.242786
yellow	GO:0043488	regulation of mRNA stability	35	4	1.48	2.7027	0.05891	0.242786
yellow	GO:0043038	amino acid activation	51	5	2.16	2.31481	0.06341	0.255762
yellow	GO:0043039	tRNA aminoacylation	51	5	2.16	2.31481	0.06341	0.255762
yellow	GO:0016568	chromatin modification	428	25	18.11	1.38045	0.06379	0.256859
yellow	GO:0006298	mismatch repair	22	3	0.93	3.22581	0.06384	0.256859
yellow	GO:0010165	response to X-ray	22	3	0.93	3.22581	0.06384	0.256859
yellow	GO:0015698	inorganic anion transport	22	3	0.93	3.22581	0.06384	0.256859
yellow	GO:0050848	regulation of calcium-mediated signaling	22	3	0.93	3.22581	0.06384	0.256859
yellow	GO:0051220	cytoplasmic sequestering of protein	22	3	0.93	3.22581	0.06384	0.256859
yellow	GO:0007094	mitotic spindle assembly checkpoint	36	4	1.52	2.63158	0.06415	0.257353
yellow	GO:0016445	somatic diversification of immunoglobuli...	36	4	1.52	2.63158	0.06415	0.257353
yellow	GO:0000090	mitotic anaphase	10	2	0.42	4.7619	0.0642	0.257353
yellow	GO:0009113	purine nucleobase biosynthetic process	10	2	0.42	4.7619	0.0642	0.257353
yellow	GO:0015937	coenzyme A biosynthetic process	10	2	0.42	4.7619	0.0642	0.257353
yellow	GO:0032897	negative regulation of viral transcripti...	10	2	0.42	4.7619	0.0642	0.257353
yellow	GO:0046040	IMP metabolic process	10	2	0.42	4.7619	0.0642	0.257353
yellow	GO:0051654	establishment of mitochondrion localizat...	10	2	0.42	4.7619	0.0642	0.257353
yellow	GO:0071470	cellular response to osmotic stress	10	2	0.42	4.7619	0.0642	0.257353
yellow	GO:0060255	regulation of macromolecule metabolic pr...	3509	164	148.47	1.1046	0.06467	0.258283
brown	GO:0006396	RNA processing	633	120	43.71	2.74537	1.2e-25	8.87727e-23
brown	GO:0016071	mRNA metabolic process	594	103	41.02	2.51097	5.3e-19	1.39125e-16
brown	GO:0006397	mRNA processing	390	79	26.93	2.93353	9.3e-19	2.2933e-16
brown	GO:0000278	mitotic cell cycle	771	115	53.24	2.16003	5.4e-16	9.65769e-14
brown	GO:0008380	RNA splicing	317	61	21.89	2.78666	1.2e-13	1.33767e-11
brown	GO:0022402	cell cycle process	1011	130	69.81	1.8622	6.4e-13	6.59241e-11
brown	GO:0000375	RNA splicing, via transesterification re...	212	45	14.64	3.07377	7e-12	6.02778e-10
brown	GO:0006259	DNA metabolic process	764	103	52.75	1.95261	1.4e-11	1.12241e-09
brown	GO:0007049	cell cycle	1321	153	91.21	1.67745	2e-11	1.55e-09
brown	GO:0022613	ribonucleoprotein complex biogenesis	251	48	17.33	2.76976	6.9e-11	4.8825e-09
brown	GO:0000377	RNA splicing, via transesterification re...	207	42	14.29	2.93912	1.6e-10	1.0805e-08
brown	GO:0000398	mRNA splicing, via spliceosome	207	42	14.29	2.93912	1.6e-10	1.0805e-08
brown	GO:0042254	ribosome biogenesis	151	34	10.43	3.25983	5.2e-10	3.293e-08
brown	GO:0006139	nucleobase-containing compound metabolic...	4389	381	303.06	1.25718	2.2e-09	1.24323e-07
brown	GO:0090304	nucleic acid metabolic process	3758	334	259.49	1.28714	4.3e-09	2.30965e-07
brown	GO:0022403	cell cycle phase	247	44	17.06	2.57913	4.5e-09	2.39338e-07
brown	GO:0006725	cellular aromatic compound metabolic pro...	4506	387	311.14	1.24381	6.1e-09	3.13178e-07
brown	GO:0034660	ncRNA metabolic process	289	48	19.96	2.40481	9.4e-09	4.70723e-07
brown	GO:0044770	cell cycle phase transition	436	63	30.11	2.09233	1.3e-08	6.39199e-07
brown	GO:0046483	heterocycle metabolic process	4505	385	311.07	1.23766	1.4e-08	6.78125e-07
brown	GO:0034470	ncRNA processing	204	38	14.09	2.69695	1.5e-08	7.22263e-07
brown	GO:0048285	organelle fission	350	54	24.17	2.23417	1.6e-08	7.61404e-07
brown	GO:0034641	cellular nitrogen compound metabolic pro...	4679	397	323.08	1.2288	1.6e-08	7.61404e-07
brown	GO:0044772	mitotic cell cycle phase transition	373	56	25.76	2.17391	2.3e-08	1.06342e-06
brown	GO:0051437	positive regulation of ubiquitin-protein...	70	20	4.83	4.14079	2.8e-08	1.27291e-06
brown	GO:0051443	positive regulation of ubiquitin-protein...	78	21	5.39	3.8961	4.1e-08	1.81819e-06
brown	GO:0000280	nuclear division	325	50	22.44	2.22816	6e-08	2.58333e-06
brown	GO:0007067	mitosis	325	50	22.44	2.22816	6e-08	2.58333e-06
brown	GO:0051351	positive regulation of ligase activity	81	21	5.59	3.75671	8.3e-08	3.46365e-06
brown	GO:0006310	DNA recombination	194	35	13.4	2.61194	1.2e-07	4.90704e-06
brown	GO:0031124	mRNA 3'-end processing	90	22	6.21	3.54267	1.3e-07	5.27618e-06
brown	GO:0051439	regulation of ubiquitin-protein ligase a...	76	20	5.25	3.80952	1.3e-07	5.27618e-06
brown	GO:0016072	rRNA metabolic process	113	25	7.8	3.20513	1.5e-07	6.02778e-06
brown	GO:0006364	rRNA processing	107	24	7.39	3.24763	2e-07	7.95844e-06
brown	GO:1901360	organic cyclic compound metabolic proces...	4644	388	320.67	1.20997	2.3e-07	9.08556e-06
brown	GO:0044260	cellular macromolecule metabolic process	5654	458	390.4	1.17316	2.3e-07	9.08556e-06
brown	GO:1901990	regulation of mitotic cell cycle phase t...	184	33	12.71	2.59638	3.3e-07	1.28487e-05
brown	GO:0031145	anaphase-promoting complex-dependent pro...	81	20	5.59	3.57782	4e-07	1.55e-05
brown	GO:0031123	RNA 3'-end processing	104	23	7.18	3.20334	4.7e-07	1.80833e-05
brown	GO:0006403	RNA localization	136	27	9.39	2.8754	4.9e-07	1.87641e-05
brown	GO:0050657	nucleic acid transport	128	26	8.84	2.94118	5e-07	1.90129e-05
brown	GO:0050658	RNA transport	128	26	8.84	2.94118	5e-07	1.90129e-05
brown	GO:0051236	establishment of RNA localization	128	26	8.84	2.94118	5e-07	1.90129e-05
brown	GO:0000082	G1/S transition of mitotic cell cycle	197	34	13.6	2.5	5.6e-07	2.12448e-05
brown	GO:0006974	response to DNA damage stimulus	612	75	42.26	1.77473	5.9e-07	2.2279e-05
brown	GO:0051325	interphase	225	37	15.54	2.38095	6.2e-07	2.33576e-05
brown	GO:0051438	regulation of ubiquitin-protein ligase a...	91	21	6.28	3.34395	7e-07	2.61897e-05
brown	GO:0006807	nitrogen compound metabolic process	4965	407	342.83	1.18718	8.9e-07	3.28452e-05
brown	GO:0006260	DNA replication	247	39	17.06	2.28605	8.9e-07	3.28452e-05
brown	GO:1901987	regulation of cell cycle phase transitio...	257	40	17.75	2.25352	9.5e-07	3.49802e-05
brown	GO:0051340	regulation of ligase activity	94	21	6.49	3.23575	1.2e-06	4.39865e-05
brown	GO:1901991	negative regulation of mitotic cell cycl...	151	28	10.43	2.68456	1.3e-06	4.74383e-05
brown	GO:0010564	regulation of cell cycle process	394	53	27.21	1.94781	1.9e-06	6.75164e-05
brown	GO:0051436	negative regulation of ubiquitin-protein...	67	17	4.63	3.67171	2e-06	7.07609e-05
brown	GO:0015931	nucleobase-containing compound transport	146	27	10.08	2.67857	2.1e-06	7.35e-05
brown	GO:0044265	cellular macromolecule catabolic process	690	80	47.64	1.67926	2.3e-06	8.03273e-05
brown	GO:1901988	negative regulation of cell cycle phase ...	228	36	15.74	2.28717	2.4e-06	8.36403e-05
brown	GO:0051726	regulation of cell cycle	658	77	45.43	1.69492	2.5e-06	8.69391e-05
brown	GO:0051329	interphase of mitotic cell cycle	221	35	15.26	2.29358	3e-06	0.000103006
brown	GO:0051352	negative regulation of ligase activity	71	17	4.9	3.46939	4.7e-06	0.000155157
brown	GO:0051444	negative regulation of ubiquitin-protein...	71	17	4.9	3.46939	4.7e-06	0.000155157
brown	GO:0007093	mitotic cell cycle checkpoint	136	25	9.39	2.66241	5.6e-06	0.000184494
brown	GO:0006271	DNA strand elongation involved in DNA re...	33	11	2.28	4.82456	7.5e-06	0.000243638
brown	GO:0006353	DNA-dependent transcription, termination	81	18	5.59	3.22004	7.6e-06	0.000245905
brown	GO:0006281	DNA repair	393	51	27.14	1.87915	8.4e-06	0.000268059
brown	GO:0000075	cell cycle checkpoint	212	33	14.64	2.2541	8.4e-06	0.000268059
brown	GO:0070647	protein modification by small protein co...	610	70	42.12	1.66192	1.5e-05	0.000450415
brown	GO:0010948	negative regulation of cell cycle proces...	257	37	17.75	2.08451	1.5e-05	0.000450415
brown	GO:0031398	positive regulation of protein ubiquitin...	127	23	8.77	2.62258	1.7e-05	0.000503045
brown	GO:0006302	double-strand break repair	119	22	8.22	2.6764	1.8e-05	0.000528791
brown	GO:0022616	DNA strand elongation	36	11	2.49	4.41767	1.9e-05	0.00055616
brown	GO:0051028	mRNA transport	112	21	7.73	2.71669	2.3e-05	0.000667246
brown	GO:0051301	cell division	449	54	31	1.74194	4e-05	0.00110339
brown	GO:0006996	organelle organization	2102	188	145.14	1.2953	4.2e-05	0.00115465
brown	GO:0043170	macromolecule metabolic process	6064	471	418.72	1.12486	4.6e-05	0.00125612
brown	GO:0007059	chromosome segregation	145	24	10.01	2.3976	5.2e-05	0.00139194
brown	GO:0010467	gene expression	3722	307	257	1.19455	5.3e-05	0.00141406
brown	GO:0043632	modification-dependent macromolecule cat...	391	48	27	1.77778	6.5e-05	0.00170076
brown	GO:0007346	regulation of mitotic cell cycle	278	37	19.2	1.92708	8.5e-05	0.00214145
brown	GO:0032446	protein modification by small protein co...	545	61	37.63	1.62105	0.00011	0.0026601
brown	GO:0031397	negative regulation of protein ubiquitin...	98	18	6.77	2.65879	0.00011	0.0026601
brown	GO:0009057	macromolecule catabolic process	841	86	58.07	1.48097	0.00012	0.00286784
brown	GO:0006378	mRNA polyadenylation	24	8	1.66	4.81928	0.00014	0.00327842
brown	GO:0016070	RNA metabolic process	3311	274	228.62	1.1985	0.00015	0.00345786
brown	GO:0000288	nuclear-transcribed mRNA catabolic proce...	59	13	4.07	3.1941	0.00015	0.00345786
brown	GO:0007051	spindle organization	84	16	5.8	2.75862	0.00017	0.003875
brown	GO:0043631	RNA polyadenylation	25	8	1.73	4.62428	0.00019	0.00423016
brown	GO:0044237	cellular metabolic process	7133	538	492.53	1.09232	0.00019	0.00423016
brown	GO:0000209	protein polyubiquitination	167	25	11.53	2.16826	0.00019	0.00423016
brown	GO:0071103	DNA conformation change	148	23	10.22	2.25049	0.0002	0.00442857
brown	GO:0044238	primary metabolic process	7135	538	492.67	1.09201	0.0002	0.00442857
brown	GO:0070979	protein K11-linked ubiquitination	26	8	1.8	4.44444	0.00025	0.00539622
brown	GO:0009128	purine nucleoside monophosphate cataboli...	70	14	4.83	2.89855	0.00025	0.00539622
brown	GO:0009158	ribonucleoside monophosphate catabolic p...	70	14	4.83	2.89855	0.00025	0.00539622
brown	GO:0009169	purine ribonucleoside monophosphate cata...	70	14	4.83	2.89855	0.00025	0.00539622
brown	GO:0006511	ubiquitin-dependent protein catabolic pr...	382	45	26.38	1.70584	0.00028	0.00594133
brown	GO:0000738	DNA catabolic process, exonucleolytic	10	5	0.69	7.24638	0.00029	0.00610576
brown	GO:0006626	protein targeting to mitochondrion	55	12	3.8	3.15789	0.0003	0.00626765
brown	GO:0044085	cellular component biogenesis	1573	142	108.61	1.30743	0.00031	0.00644349
brown	GO:0033554	cellular response to stress	1139	108	78.65	1.37317	0.00032	0.00660076
brown	GO:0031570	DNA integrity checkpoint	134	21	9.25	2.27027	0.00033	0.00678982
brown	GO:0009125	nucleoside monophosphate catabolic proce...	72	14	4.97	2.8169	0.00035	0.00708489
brown	GO:0006354	DNA-dependent transcription, elongation	107	18	7.39	2.43572	0.00035	0.00708489
brown	GO:0000819	sister chromatid segregation	56	12	3.87	3.10078	0.00036	0.00726022
brown	GO:0019941	modification-dependent protein catabolic...	387	45	26.72	1.68413	0.00038	0.00761638
brown	GO:0045786	negative regulation of cell cycle	290	36	20.02	1.7982	0.00042	0.00825543
brown	GO:0031396	regulation of protein ubiquitination	176	25	12.15	2.05761	0.00044	0.00860697
brown	GO:0006200	ATP catabolic process	66	13	4.56	2.85088	0.00049	0.00942642
brown	GO:0051168	nuclear export	120	19	8.29	2.29192	0.00054	0.0101484
brown	GO:0034655	nucleobase-containing compound catabolic...	699	71	48.27	1.47089	0.00057	0.0106385
brown	GO:0051603	proteolysis involved in cellular protein...	406	46	28.03	1.6411	0.00058	0.0108127
brown	GO:0051310	metaphase plate congression	17	6	1.17	5.12821	0.00068	0.0123103
brown	GO:0006521	regulation of cellular amino acid metabo...	52	11	3.59	3.06407	0.0007	0.0126163
brown	GO:0007077	mitotic nuclear envelope disassembly	37	9	2.55	3.52941	0.00073	0.0130701
brown	GO:0009126	purine nucleoside monophosphate metaboli...	123	19	8.49	2.23793	0.00074	0.0131767
brown	GO:0009167	purine ribonucleoside monophosphate meta...	123	19	8.49	2.23793	0.00074	0.0131767
brown	GO:0033238	regulation of cellular amine metabolic p...	69	13	4.76	2.73109	0.00077	0.0135478
brown	GO:0006368	transcription elongation from RNA polyme...	78	14	5.39	2.5974	0.00081	0.0141446
brown	GO:0006369	termination of RNA polymerase II transcr...	45	10	3.11	3.21543	0.00081	0.0141446
brown	GO:0030071	regulation of mitotic metaphase/anaphase...	45	10	3.11	3.21543	0.00081	0.0141446
brown	GO:1902099	regulation of metaphase/anaphase transit...	45	10	3.11	3.21543	0.00081	0.0141446
brown	GO:0000070	mitotic sister chromatid segregation	53	11	3.66	3.00546	0.00083	0.0144011
brown	GO:0009161	ribonucleoside monophosphate metabolic p...	134	20	9.25	2.16216	0.00085	0.0147011
brown	GO:0071840	cellular component organization or bioge...	3845	306	265.49	1.15259	0.00091	0.0154596
brown	GO:0044774	mitotic DNA integrity checkpoint	79	14	5.45	2.56881	0.00092	0.0155969
brown	GO:0071704	organic substance metabolic process	7336	546	506.55	1.07788	0.00093	0.0157336
brown	GO:0000726	non-recombinational repair	18	6	1.24	4.83871	0.00096	0.0161238
brown	GO:0032786	positive regulation of DNA-dependent tra...	18	6	1.24	4.83871	0.00096	0.0161238
brown	GO:0007091	metaphase/anaphase transition of mitotic...	46	10	3.18	3.14465	0.00097	0.0162582
brown	GO:0044784	metaphase/anaphase transition of cell cy...	46	10	3.18	3.14465	0.00097	0.0162582
brown	GO:0006977	DNA damage response, signal transduction...	63	12	4.35	2.75862	0.00109	0.0177753
brown	GO:0072413	signal transduction involved in mitotic ...	63	12	4.35	2.75862	0.00109	0.0177753
brown	GO:0072431	signal transduction involved in mitotic ...	63	12	4.35	2.75862	0.00109	0.0177753
brown	GO:0030397	membrane disassembly	39	9	2.69	3.34572	0.0011	0.0178312
brown	GO:0051081	nuclear envelope disassembly	39	9	2.69	3.34572	0.0011	0.0178312
brown	GO:0051276	chromosome organization	643	65	44.4	1.46396	0.0011	0.0178312
brown	GO:0044257	cellular protein catabolic process	419	46	28.93	1.59004	0.00113	0.0181727
brown	GO:0000279	M phase	25	7	1.73	4.04624	0.00116	0.0185452
brown	GO:0032784	regulation of DNA-dependent transcriptio...	32	8	2.21	3.61991	0.00118	0.0188279
brown	GO:0071826	ribonucleoprotein complex subunit organi...	128	19	8.84	2.14932	0.00121	0.019175
brown	GO:0007080	mitotic metaphase plate congression	13	5	0.9	5.55556	0.00125	0.0197129
brown	GO:0032968	positive regulation of transcription elo...	13	5	0.9	5.55556	0.00125	0.0197129
brown	GO:0072401	signal transduction involved in DNA inte...	64	12	4.42	2.71493	0.00126	0.0197748
brown	GO:0072422	signal transduction involved in DNA dama...	64	12	4.42	2.71493	0.00126	0.0197748
brown	GO:0034243	regulation of transcription elongation f...	19	6	1.31	4.58015	0.00132	0.0204795
brown	GO:0050685	positive regulation of mRNA processing	19	6	1.31	4.58015	0.00132	0.0204795
brown	GO:0007088	regulation of mitosis	91	15	6.28	2.38854	0.00133	0.0205954
brown	GO:0051783	regulation of nuclear division	91	15	6.28	2.38854	0.00133	0.0205954
brown	GO:0009123	nucleoside monophosphate metabolic proce...	139	20	9.6	2.08333	0.00135	0.0208456
brown	GO:0072395	signal transduction involved in cell cyc...	65	12	4.49	2.67261	0.00145	0.0220755
brown	GO:0044270	cellular nitrogen compound catabolic pro...	724	71	49.99	1.42028	0.00149	0.0224535
brown	GO:0046700	heterocycle catabolic process	724	71	49.99	1.42028	0.00149	0.0224535
brown	GO:0033260	nuclear cell cycle DNA replication	26	7	1.8	3.88889	0.0015	0.0225416
brown	GO:0019439	aromatic compound catabolic process	725	71	50.06	1.4183	0.00154	0.0229519
brown	GO:0006401	RNA catabolic process	213	27	14.71	1.83549	0.00156	0.0230809
brown	GO:0016567	protein ubiquitination	509	53	35.15	1.50782	0.00164	0.0239381
brown	GO:0008152	metabolic process	7671	566	529.68	1.06857	0.00166	0.0241434
brown	GO:0002479	antigen processing and presentation of e...	66	12	4.56	2.63158	0.00167	0.0242455
brown	GO:0022618	ribonucleoprotein complex assembly	122	18	8.42	2.13777	0.00173	0.0248946
brown	GO:0042590	antigen processing and presentation of e...	67	12	4.63	2.59179	0.00191	0.0265686
brown	GO:0002474	antigen processing and presentation of p...	85	14	5.87	2.38501	0.00192	0.0266394
brown	GO:0044773	mitotic DNA damage checkpoint	76	13	5.25	2.47619	0.00194	0.0267799
brown	GO:0044403	symbiosis, encompassing mutualism throug...	635	63	43.85	1.43672	0.00206	0.0279155
brown	GO:0044419	interspecies interaction between organis...	635	63	43.85	1.43672	0.00206	0.0279155
brown	GO:2000045	regulation of G1/S transition of mitotic...	105	16	7.25	2.2069	0.00218	0.0292253
brown	GO:0006312	mitotic recombination	35	8	2.42	3.30579	0.0022	0.0294207
brown	GO:0006457	protein folding	176	23	12.15	1.893	0.00227	0.0300849
brown	GO:0050000	chromosome localization	21	6	1.45	4.13793	0.00235	0.0307693
brown	GO:0051303	establishment of chromosome localization	21	6	1.45	4.13793	0.00235	0.0307693
brown	GO:0072655	establishment of protein localization to...	78	13	5.39	2.41187	0.00246	0.0317498
brown	GO:0006261	DNA-dependent DNA replication	97	15	6.7	2.23881	0.00255	0.03255
brown	GO:0006458	'de novo' protein folding	52	10	3.59	2.78552	0.00259	0.0329314
brown	GO:0043161	proteasomal ubiquitin-dependent protein ...	232	28	16.02	1.74782	0.00269	0.0339849
brown	GO:0006997	nucleus organization	79	13	5.45	2.38532	0.00277	0.0345719
brown	GO:0070585	protein localization to mitochondrion	79	13	5.45	2.38532	0.00277	0.0345719
brown	GO:0031571	mitotic G1 DNA damage checkpoint	70	12	4.83	2.48447	0.0028	0.0346277
brown	GO:0044783	G1 DNA damage checkpoint	70	12	4.83	2.48447	0.0028	0.0346277
brown	GO:0048002	antigen processing and presentation of p...	158	21	10.91	1.92484	0.00282	0.0347957
brown	GO:0044764	multi-organism cellular process	608	60	41.98	1.42925	0.00296	0.0360991
brown	GO:0000077	DNA damage checkpoint	128	18	8.84	2.0362	0.00297	0.0360991
brown	GO:0032508	DNA duplex unwinding	29	7	2	3.5	0.00297	0.0360991
brown	GO:0043928	exonucleolytic nuclear-transcribed mRNA ...	29	7	2	3.5	0.00297	0.0360991
brown	GO:1901361	organic cyclic compound catabolic proces...	745	71	51.44	1.38025	0.00309	0.0371142
brown	GO:0046034	ATP metabolic process	99	15	6.84	2.19298	0.00312	0.0373093
brown	GO:0090305	nucleic acid phosphodiester bond hydroly...	62	11	4.28	2.57009	0.00314	0.0375209
brown	GO:0031577	spindle checkpoint	45	9	3.11	2.89389	0.00317	0.0376857
brown	GO:0006513	protein monoubiquitination	37	8	2.55	3.13725	0.0032	0.0378764
brown	GO:0045841	negative regulation of mitotic metaphase...	37	8	2.55	3.13725	0.0032	0.0378764
brown	GO:1902100	negative regulation of metaphase/anaphas...	37	8	2.55	3.13725	0.0032	0.0378764
brown	GO:0000076	DNA replication checkpoint	10	4	0.69	5.7971	0.00338	0.039097
brown	GO:0000090	mitotic anaphase	10	4	0.69	5.7971	0.00338	0.039097
brown	GO:0006998	nuclear envelope organization	54	10	3.73	2.68097	0.00345	0.0397654
brown	GO:0006303	double-strand break repair via nonhomolo...	16	5	1.1	4.54545	0.00356	0.0404602
brown	GO:0006308	DNA catabolic process	63	11	4.35	2.52874	0.00357	0.0405173
brown	GO:0000291	nuclear-transcribed mRNA catabolic proce...	30	7	2.07	3.38164	0.00365	0.041053
brown	GO:0016574	histone ubiquitination	30	7	2.07	3.38164	0.00365	0.041053
brown	GO:0071705	nitrogen compound transport	434	45	29.97	1.5015	0.00388	0.0427246
brown	GO:0019882	antigen processing and presentation	173	22	11.95	1.841	0.00393	0.0430712
brown	GO:0006405	RNA export from nucleus	73	12	5.04	2.38095	0.004	0.0435743
brown	GO:0016032	viral process	606	59	41.84	1.41013	0.0043	0.0456209
black	GO:0007126	meiosis	116	10	3.13	3.19489	0.0012	0.0190351
black	GO:0071704	organic substance metabolic process	7336	222	198.13	1.12048	0.0016	0.0234595
black	GO:0008654	phospholipid biosynthetic process	187	13	5.05	2.57426	0.0017	0.0245715
black	GO:0007131	reciprocal meiotic recombination	33	5	0.89	5.61798	0.0018	0.0255183
black	GO:0035825	reciprocal DNA recombination	33	5	0.89	5.61798	0.0018	0.0255183
black	GO:0051321	meiotic cell cycle	123	10	3.32	3.01205	0.0018	0.0255183
black	GO:0046474	glycerophospholipid biosynthetic process	166	12	4.48	2.67857	0.0018	0.0255183
black	GO:0014067	negative regulation of phosphatidylinosi...	10	3	0.27	11.1111	0.002	0.0273529
black	GO:0045017	glycerolipid biosynthetic process	197	13	5.32	2.44361	0.0027	0.0339849
black	GO:0044238	primary metabolic process	7135	215	192.7	1.11572	0.0034	0.0392725
black	GO:0007127	meiosis I	55	6	1.49	4.02685	0.0035	0.0399737
black	GO:0051056	regulation of small GTPase mediated sign...	334	18	9.02	1.99557	0.0042	0.0448818
black	GO:0045185	maintenance of protein location	103	8	2.78	2.8777	0.0067	0.0613633
black	GO:0036151	phosphatidylcholine acyl-chain remodelin...	15	3	0.41	7.31707	0.007	0.0626168
black	GO:0044237	cellular metabolic process	7133	213	192.64	1.10569	0.007	0.0626168
black	GO:0006650	glycerophospholipid metabolic process	197	12	5.32	2.25564	0.0072	0.0636156
black	GO:0042307	positive regulation of protein import in...	46	5	1.24	4.03226	0.0077	0.0663407
black	GO:0051084	'de novo' posttranslational protein fold...	47	5	1.27	3.93701	0.0084	0.0702518
black	GO:0046486	glycerolipid metabolic process	252	14	6.81	2.0558	0.0085	0.0705804
black	GO:0048193	Golgi vesicle transport	180	11	4.86	2.26337	0.0097	0.0773182
black	GO:0046578	regulation of Ras protein signal transdu...	256	14	6.91	2.02605	0.0097	0.0773182
black	GO:0008610	lipid biosynthetic process	449	21	12.13	1.73124	0.0102	0.0797794
black	GO:0032507	maintenance of protein location in cell	90	7	2.43	2.88066	0.0108	0.0830263
black	GO:2000649	regulation of sodium ion transmembrane t...	18	3	0.49	6.12245	0.0118	0.0879327
black	GO:0032446	protein modification by small protein co...	545	24	14.72	1.63043	0.0126	0.0924966
black	GO:0034453	microtubule anchoring	34	4	0.92	4.34783	0.0128	0.0933644
black	GO:0006458	'de novo' protein folding	52	5	1.4	3.57143	0.0128	0.0933644
black	GO:0008152	metabolic process	7671	225	207.18	1.08601	0.013	0.0943153
black	GO:0006644	phospholipid metabolic process	241	13	6.51	1.99693	0.0139	0.098744
black	GO:0070647	protein modification by small protein co...	610	26	16.47	1.57863	0.0142	0.100132
black	GO:0034613	cellular protein localization	917	36	24.77	1.45337	0.0144	0.10093
black	GO:0016197	endosomal transport	142	9	3.84	2.34375	0.0148	0.102673
black	GO:0070727	cellular macromolecule localization	922	36	24.9	1.44578	0.0156	0.106676
black	GO:0007264	small GTPase mediated signal transductio...	557	24	15.04	1.59574	0.0161	0.10868
black	GO:0051235	maintenance of location	170	10	4.59	2.17865	0.017	0.11206
black	GO:0051651	maintenance of location in cell	99	7	2.67	2.62172	0.0176	0.11499
black	GO:0044260	cellular macromolecule metabolic process	5654	171	152.7	1.11984	0.0184	0.11827
black	GO:0090304	nucleic acid metabolic process	3758	119	101.49	1.17253	0.0185	0.118743
black	GO:0090316	positive regulation of intracellular pro...	78	6	2.11	2.8436	0.0187	0.119388
black	GO:0016567	protein ubiquitination	509	22	13.75	1.6	0.02	0.123529
black	GO:0033143	regulation of intracellular steroid horm...	39	4	1.05	3.80952	0.0204	0.125145
black	GO:1902110	positive regulation of mitochondrial mem...	39	4	1.05	3.80952	0.0204	0.125145
black	GO:0006807	nitrogen compound metabolic process	4965	152	134.09	1.13357	0.0204	0.125145
black	GO:0033157	regulation of intracellular protein tran...	150	9	4.05	2.22222	0.0205	0.125522
black	GO:0030501	positive regulation of bone mineralizati...	22	3	0.59	5.08475	0.0205	0.125522
black	GO:0070169	positive regulation of biomineral tissue...	22	3	0.59	5.08475	0.0205	0.125522
black	GO:0045667	regulation of osteoblast differentiation	80	6	2.16	2.77778	0.0209	0.126637
black	GO:0016070	RNA metabolic process	3311	106	89.42	1.18542	0.021	0.127007
black	GO:0000288	nuclear-transcribed mRNA catabolic proce...	59	5	1.59	3.14465	0.0212	0.127742
black	GO:0035794	positive regulation of mitochondrial mem...	40	4	1.08	3.7037	0.0222	0.131623
black	GO:0031123	RNA 3'-end processing	104	7	2.81	2.4911	0.0224	0.132338
black	GO:0032388	positive regulation of intracellular tra...	104	7	2.81	2.4911	0.0224	0.132338
black	GO:0046824	positive regulation of nucleocytoplasmic...	60	5	1.62	3.08642	0.0226	0.132977
black	GO:1902305	regulation of sodium ion transmembrane t...	23	3	0.62	4.83871	0.0232	0.135285
black	GO:1902108	regulation of mitochondrial membrane per...	41	4	1.11	3.6036	0.0241	0.138547
black	GO:0043170	macromolecule metabolic process	6064	181	163.77	1.10521	0.0243	0.138677
black	GO:0048610	cellular process involved in reproductio...	317	15	8.56	1.75234	0.0252	0.143102
black	GO:0019048	modulation by virus of host morphology o...	318	15	8.59	1.74622	0.0259	0.144654
black	GO:0006661	phosphatidylinositol biosynthetic proces...	84	6	2.27	2.64317	0.0259	0.144654
black	GO:0043001	Golgi to plasma membrane protein transpo...	24	3	0.65	4.61538	0.0259	0.144654
black	GO:0043470	regulation of carbohydrate catabolic pro...	24	3	0.65	4.61538	0.0259	0.144654
black	GO:0043471	regulation of cellular carbohydrate cata...	24	3	0.65	4.61538	0.0259	0.144654
black	GO:0044003	modification by symbiont of host morphol...	320	15	8.64	1.73611	0.0271	0.14956
black	GO:0007265	Ras protein signal transduction	349	16	9.43	1.69671	0.0275	0.151306
black	GO:0014066	regulation of phosphatidylinositol 3-kin...	43	4	1.16	3.44828	0.0282	0.153253
black	GO:0034641	cellular nitrogen compound metabolic pro...	4679	143	126.37	1.1316	0.0283	0.153253
black	GO:0007141	male meiosis I	10	2	0.27	7.40741	0.0283	0.153253
black	GO:0043046	DNA methylation involved in gamete gener...	10	2	0.27	7.40741	0.0283	0.153253
black	GO:0051654	establishment of mitochondrion localizat...	10	2	0.27	7.40741	0.0283	0.153253
black	GO:0046467	membrane lipid biosynthetic process	86	6	2.32	2.58621	0.0287	0.154462
black	GO:0006890	retrograde vesicle-mediated transport, G...	25	3	0.68	4.41176	0.0289	0.155333
black	GO:0008333	endosome to lysosome transport	25	3	0.68	4.41176	0.0289	0.155333
black	GO:0032856	activation of Ras GTPase activity	25	3	0.68	4.41176	0.0289	0.155333
black	GO:0001649	osteoblast differentiation	110	7	2.97	2.3569	0.0293	0.157068
black	GO:0046483	heterocycle metabolic process	4505	138	121.67	1.13422	0.0301	0.15983
black	GO:0006725	cellular aromatic compound metabolic pro...	4506	138	121.7	1.13394	0.0303	0.160734
black	GO:0006351	transcription, DNA-dependent	2621	85	70.79	1.20073	0.0312	0.163484
black	GO:0034629	cellular protein complex localization	11	2	0.3	6.66667	0.034	0.172237
black	GO:0070935	3'-UTR-mediated mRNA stabilization	11	2	0.3	6.66667	0.034	0.172237
black	GO:0032880	regulation of protein localization	330	15	8.91	1.6835	0.0343	0.172985
black	GO:0051817	modification of morphology or physiology...	333	15	8.99	1.66852	0.0367	0.181382
black	GO:0006139	nucleobase-containing compound metabolic...	4389	134	118.54	1.13042	0.0372	0.182358
black	GO:1901360	organic cyclic compound metabolic proces...	4644	141	125.42	1.12422	0.0373	0.182794
black	GO:0046902	regulation of mitochondrial membrane per...	47	4	1.27	3.14961	0.0375	0.183553
black	GO:0035821	modification of morphology or physiology...	334	15	9.02	1.66297	0.0375	0.183553
black	GO:0070201	regulation of establishment of protein l...	277	13	7.48	1.73797	0.0378	0.184799
black	GO:0051656	establishment of organelle localization	168	9	4.54	1.98238	0.0385	0.186429
black	GO:0045778	positive regulation of ossification	28	3	0.76	3.94737	0.0388	0.187069
black	GO:0007030	Golgi organization	48	4	1.3	3.07692	0.0401	0.190883
black	GO:0006893	Golgi to plasma membrane transport	29	3	0.78	3.84615	0.0425	0.197512
black	GO:0035725	sodium ion transmembrane transport	29	3	0.78	3.84615	0.0425	0.197512
black	GO:0043928	exonucleolytic nuclear-transcribed mRNA ...	29	3	0.78	3.84615	0.0425	0.197512
black	GO:0032318	regulation of Ras GTPase activity	145	8	3.92	2.04082	0.0428	0.198623
black	GO:0019637	organophosphate metabolic process	963	35	26.01	1.34564	0.0429	0.198917
black	GO:0009966	regulation of signal transduction	1559	53	42.1	1.25891	0.043	0.199097
black	GO:0000291	nuclear-transcribed mRNA catabolic proce...	30	3	0.81	3.7037	0.0463	0.208216
black	GO:0006342	chromatin silencing	30	3	0.81	3.7037	0.0463	0.208216
black	GO:0007040	lysosome organization	30	3	0.81	3.7037	0.0463	0.208216
black	GO:0072337	modified amino acid transport	13	2	0.35	5.71429	0.0466	0.20916
black	GO:0046907	intracellular transport	1171	41	31.63	1.29624	0.0491	0.217206
black	GO:0006457	protein folding	176	9	4.75	1.89474	0.0493	0.2175
black	GO:0008033	tRNA processing	74	5	2	2.5	0.0495	0.218146
black	GO:0034470	ncRNA processing	204	10	5.51	1.81488	0.0501	0.220416
black	GO:0032386	regulation of intracellular transport	261	12	7.05	1.70213	0.051	0.222646
black	GO:0051701	interaction with host	349	15	9.43	1.59067	0.0515	0.224048
black	GO:0044248	cellular catabolic process	1511	51	40.81	1.24969	0.0521	0.226174
black	GO:0036152	phosphatidylethanolamine acyl-chain remo...	14	2	0.38	5.26316	0.0534	0.2298
black	GO:0045880	positive regulation of smoothened signal...	14	2	0.38	5.26316	0.0534	0.2298
black	GO:0046337	phosphatidylethanolamine metabolic proce...	14	2	0.38	5.26316	0.0534	0.2298
black	GO:0048557	embryonic digestive tract morphogenesis	14	2	0.38	5.26316	0.0534	0.2298
black	GO:0070076	histone lysine demethylation	14	2	0.38	5.26316	0.0534	0.2298
black	GO:0090407	organophosphate biosynthetic process	411	17	11.1	1.53153	0.0537	0.230206
black	GO:0090100	positive regulation of transmembrane rec...	53	4	1.43	2.7972	0.0544	0.232256
black	GO:0051641	cellular localization	1825	60	49.29	1.21729	0.056	0.236973
black	GO:0006396	RNA processing	633	24	17.1	1.40351	0.0582	0.242026
black	GO:0019369	arachidonic acid metabolic process	33	3	0.89	3.37079	0.0587	0.242289
black	GO:0051568	histone H3-K4 methylation	33	3	0.89	3.37079	0.0587	0.242289
black	GO:0006892	post-Golgi vesicle-mediated transport	78	5	2.11	2.36967	0.0595	0.244845
black	GO:0032774	RNA biosynthetic process	2704	85	73.03	1.16391	0.0606	0.248179
black	GO:0034067	protein localization to Golgi apparatus	15	2	0.41	4.87805	0.0606	0.248179
black	GO:0035196	production of miRNAs involved in gene si...	15	2	0.41	4.87805	0.0606	0.248179
black	GO:0008104	protein localization	1462	49	39.49	1.24082	0.0623	0.253117
black	GO:0040029	regulation of gene expression, epigeneti...	130	7	3.51	1.9943	0.0624	0.253126
black	GO:0045814	negative regulation of gene expression, ...	34	3	0.92	3.26087	0.0631	0.25508
black	GO:0090003	regulation of establishment of protein l...	34	3	0.92	3.26087	0.0631	0.25508
black	GO:0030148	sphingolipid biosynthetic process	56	4	1.51	2.64901	0.0641	0.257353
black	GO:1901575	organic substance catabolic process	1602	53	43.27	1.22487	0.0648	0.258567
black	GO:0048011	neurotrophin TRK receptor signaling path...	244	11	6.59	1.6692	0.0671	0.264405
black	GO:0014065	phosphatidylinositol 3-kinase cascade	57	4	1.54	2.5974	0.0676	0.265811
black	GO:0030282	bone mineralization	57	4	1.54	2.5974	0.0676	0.265811
black	GO:0006636	unsaturated fatty acid biosynthetic proc...	35	3	0.95	3.15789	0.0677	0.265986
black	GO:0043488	regulation of mRNA stability	35	3	0.95	3.15789	0.0677	0.265986
black	GO:0030857	negative regulation of epithelial cell d...	16	2	0.43	4.65116	0.068	0.266354
black	GO:0031050	dsRNA fragmentation	16	2	0.43	4.65116	0.068	0.266354
black	GO:0031146	SCF-dependent proteasomal ubiquitin-depe...	16	2	0.43	4.65116	0.068	0.266354
black	GO:0032402	melanosome transport	16	2	0.43	4.65116	0.068	0.266354
black	GO:0070918	production of small RNA involved in gene...	16	2	0.43	4.65116	0.068	0.266354
black	GO:0010467	gene expression	3722	113	100.52	1.12415	0.0697	0.271575
black	GO:0016570	histone modification	275	12	7.43	1.61507	0.0698	0.271704
black	GO:0044255	cellular lipid metabolic process	678	25	18.31	1.36537	0.0698	0.271704
black	GO:0038179	neurotrophin signaling pathway	247	11	6.67	1.64918	0.0718	0.276775
black	GO:0046488	phosphatidylinositol metabolic process	108	6	2.92	2.05479	0.0721	0.277734
black	GO:0009056	catabolic process	1787	58	48.26	1.20182	0.073	0.279601
black	GO:0033036	macromolecule localization	1684	55	45.48	1.20932	0.0731	0.279601
[truncated: 4,856 more rows]

## Sheet: ApP - IS
module	GO.ID	Term	Annotated	Significant	Expected	fold_enrichment	classic	BH
[truncated: 5,400 more rows]

[truncated: 2 more sheets: Selected modules, Column names key]
